# Supplementary material for: Generating Novel Aroma Phenotypes Using Commercial Wine Samples to Characterize an F1 Population
Source: Front Plant Sci. 2022 Jun 21;13:894492. doi: 10.3389/fpls.2022.894492 (PMC9253817; doi:10.3389/fpls.2022.894492)
Supplement: Supplementary file 3 [file Data_Sheet_1.xlsx]

## Sheet: supplementary table 1 
Wine features
Table S1 showing wine feature differences between Norton and Cabernet Sauvignon with fold change >1.5 and p-value <0.005.
Features (m/z,time)	fold change	log2fold	tstat	pvalue	qvalue	updown	mzmed	mzmin	mzmax	rtmed	rtmin	rtmax	Cab_1b	Cab_2b	Cab10a	Cab10b	Cab11a	Cab11b	Cab1a	Cab2a	Cab3a	Cab3b	Cab4a	Cab4b	Cab5a	Cab5b	Cab6a	Cab6b	Cab7a	Cab7b	Cab8a	Cab8b	Cab9a	Cab9b	Nor10a	Nor10b	Nor11a	Nor11b	Nor1a	Nor1b	Nor2a	Nor2b	Nor3a	Nor3b	Nor4a	Nor4b	Nor5a	Nor5b	Nor6a
M146T23	170.272	7.4117	6.25967	3.29546e-06	1.07169e-05	UP	146.1	146.1	146.1	23.1762	23.1696	23.183	425.784	479	188.119	77.4733	417.062	507.564	595.266	327.467	1389.86	1082.51	323.144	366.955	215.336	422.78	583.03	652.39	300.717	437.356	784.532	366.936	734.147	260.834	127968	0	2924.06	3592.64	72760.8	76784.6	80976	79667.7	145539	141797	60241.1	62663.8	220922	218518	81663.9
M146T18	103.247	6.68996	6.0639	5.11e-06	1.53481e-05	UP	146.1	146.1	146.1	17.7207	17.2218	18.0237	218.995	162.842	40.8649	127.687	235.971	424.275	174.887	132.54	1293.32	1117.96	152.963	240.791	179.276	502.03	308.238	239.738	48.7157	307.206	748.891	505.594	585.581	1070.41	42532.1	0	5254.93	1870.77	29530.8	36707.3	61372.6	45391.7	36463.1	34584.3	36891.9	36485.9	114339	106454	68803
M164T31	41.1844	5.36403	9.67645	3.322e-09	2.02005e-08	UP	164.1	164.1	164.1	31.0384	31.0344	31.0461	20630.1	5136.11	6313.01	9346.68	28669	26777.8	10135.7	3961.49	10048.9	12582.3	7576.44	9452.42	1694.99	2476.93	5872.87	7867.52	13151.8	18795.3	15178	30216.4	45001.7	42127.9	979328	270.594	986441	1.04421e+06	481846	563311	378962	445866	620555	683872	606844	615858	686466	740260	697443
M166T17	30.3055	4.92151	6.62029	1.47893e-06	5.33961e-06	UP	166.1	166.1	166.1	17.2907	17.2714	17.3197	1028.5	683.986	806.971	601.582	1573.54	1493.67	1431.69	1227.45	2904.5	1696.3	1466.42	1125.79	1976.18	1491.38	1079.4	1168.74	936.337	599.539	1937.21	1040.48	596.26	1379.11	69663.2	43.1771	4112.98	6370.33	24030.2	21165.2	34139	32690.1	69947.7	62998.5	29015.1	28879.2	73392.3	70255.3	46117.2
M195T27	28.7279	-4.84438	-4.81399	9.27867e-05	0.000115809	DOWN	195	195	195	26.9643	26.9492	26.9678	33794.4	1294.99	27134.3	27931.2	39334	38541.7	35128.7	1362.32	4334.57	7370.59	37138.6	39746.7	51.6843	0	0	0	30903.8	29312.9	81205.4	76132.8	13221.4	10548.9	0	0	0	0	159.057	43.8275	53.1905	37.1951	39.1312	155.871	0	0	41.3826	114.927	1049.42
M63T31	26.9402	4.75169	4.61436	0.000149325	0.00017343	UP	63	63	63	31.0384	31.0344	31.1812	1076.83	4152.91	975.324	1348.97	2315.75	1685.53	1954.92	5443.3	1530.83	1710.92	1458.69	876.092	886.475	616.278	1189.84	1506.8	1402.27	1333.83	2285.5	2707.33	2388.91	2499.97	39750.6	0	38875.2	38870.7	168294	150125	24109.2	22322.7	140518	138246	23128	27109.6	40825.7	39529.9	26256.4
M50T31	22.0193	4.4607	4.96206	6.3058e-05	8.75817e-05	UP	50	50	50	31.0384	31.0344	31.1812	465.75	2199.5	513.497	400.199	808.703	1286.66	999.06	3058.54	883.944	651.29	299.811	385.528	797.244	381.413	899.376	527.856	619.76	577.87	554.339	1383.77	11479	1722.61	22897.7	0	28119.2	29439.3	97768.5	88533.8	16509	11936.2	77564.4	76315.2	18366.4	16507.1	25359.8	29249	18970.8
M165T31	19.6083	4.29339	10.1527	1.42394e-09	1.01809e-08	UP	165.1	165.1	165.1	31.0384	31.0344	31.0462	4851.91	3595.69	2539.8	2728.64	4923.29	6453.68	4045.9	3470.25	1644.35	2905.47	2623.71	3928.15	2623.66	2491.36	4503.69	1744.21	4777.92	2941.95	5517.42	5051.96	4052.43	7501.55	110869	185.852	113937	117711	64410.1	64622.9	51687.3	56211.4	82609.6	86181.1	70283	79108	84418.7	96529.5	83303.4
M175T27	17.8442	-4.15739	-4.37551	0.000256521	0.000264743	DOWN	175	175	175.1	26.9623	26.0927	26.9719	35101.4	1913.01	30364.7	25299.7	39087.8	37910.2	31979.4	3777.15	7309.77	7964.33	45297.1	38133	452.636	289.804	518.677	186.375	4326.64	28525.8	84541.1	80366.1	14473	12218.5	357.839	0	214.642	269.208	833.044	850.961	869.155	812.888	651.325	661.914	566.036	450.86	782.085	920.707	2159.72
M131T30	16.3095	4.02764	6.58824	1.5826e-06	5.61765e-06	UP	131	131	131	30.3746	30.3692	30.3941	15128.4	13644.2	9972.54	10558.1	22317.6	24697.2	18548.1	13892.6	19644.7	15643.6	14236.6	13259.6	9896.88	10603.7	14615.1	10466	11790.9	10703.6	13691.4	12177.4	13247.3	18246.7	253585	740.933	160300	169218	137507	133036	142163	140575	180026	179254	401100	398749	119697	120227	185178
M80T23	13.4247	3.74682	5.83113	8.45271e-06	2.32736e-05	UP	80.1	80	80.1	23.4311	23.1048	23.439	1126.22	1226.67	1197.61	858.464	1020.25	1119.97	1068.89	1271.01	1188.06	686.073	775.203	942.043	3910.6	619.616	1355.37	1021.13	895.01	882.204	1157.75	1133.72	937.338	586.816	35897.6	0	8045.58	9293.81	12141.9	12931.3	6063.76	7129.57	16322	13899.7	9706.47	9988.44	23050.6	21262.7	34617.1
M107T31	13.1999	3.72246	2.29193	0.0321179	0.0142213	UP	107	107	107	31.178	31.0306	31.3131	11394.2	3034.6	3621.06	3962.79	37960.8	33602.3	12342.2	3920.75	121891	141281	4553.65	4554.27	2786.87	4068.8	13862.1	10651.5	6401.72	8066.5	3279.83	6726.67	879277	869343	88001	1107.8	2166.03	3120.15	6.99763e+06	6.57528e+06	29574.2	25050.1	5.97422e+06	5.93071e+06	90202.6	93071.3	1.0784e+06	1.22166e+06	134164
M77T31	10.0774	3.33305	4.13565	0.000453148	0.000414672	UP	77	77	77	31.0422	31.0304	31.3168	17473.5	14697.1	8839.6	37647.8	20243.6	15691.3	25828.6	23562.3	55079.6	15397.8	12206.5	36645.9	11194.4	9101.13	14658.5	28158.2	12871.3	12646	15560.3	35179.7	32855.7	143180	222085	1261.29	261127	250793	1.03553e+06	977022	138824	147958	167649	776270	163605	151985	205112	223496	175519
M120T24	9.07981	3.18266	4.6796	0.000127234	0.000151692	UP	120	120	120	23.9468	23.9362	23.9764	32913.8	21531.3	16908.4	18342.1	29009.4	29327.1	36804.1	18461.2	47549.8	47938.4	28038.3	25710.5	24957.9	19454.9	31439.9	30869.5	27948.5	20495.5	20591.2	27205.6	21325.2	22324.7	261618	129.025	129106	139270	120113	111203	136285	127703	177256	169517	259719	250478	209513	206161	840088
M120T11	8.41849	3.07356	5.07565	4.14106e-05	6.99901e-05	UP	120.1	120	120.1	10.8001	10.7619	11.0161	458.231	50.8965	470.385	202.613	726.69	857.517	494.923	488.139	2748.68	3103.45	711.421	779.191	1527.12	1629.93	2834.37	3806.66	318.661	448.418	1347.39	1079.91	9427.75	6073.56	26267.1	0	2580.58	2176.65	9450.71	5304.27	20896.3	14326.3	6462.59	4369.42	14358	13172.7	24035.5	20326.7	13050.2
M134T11	7.86573	2.97558	4.96262	5.61752e-05	8.26534e-05	UP	134.1	134.1	134.1	10.7973	10.7619	10.8226	1132.63	1444.26	959.801	681.388	2423.86	2252.49	1345.97	813.998	9102.53	9516.85	2597.82	2553.07	5349.22	5267.98	9565.48	6057.94	1145.01	1267.66	4494.22	6153.19	21719.3	18664.9	75033.1	174.386	6654.07	8312.7	12230.3	19297.3	39899.4	46907.3	12045	10660.5	38329.1	32633.4	58453	57356.7	50998.7
M82T14	7.50513	2.90788	6.33799	2.59022e-06	8.72462e-06	UP	82.1	82.1	82.1	13.7781	13.2431	13.7931	8633.76	7743.77	8002.48	7953.2	17703	16728.8	9756.96	3195.09	12149.3	10181.2	4195.89	9340.27	13950.1	11772.5	15795.2	14712.4	12453.8	10018.2	20736.4	18141.7	8928.69	6446.15	86672.1	0	23514.1	94929.2	68942.1	59666.1	34117	41724.4	149807	152754	173728	178820	57584.4	57206.2	103692
M137T24	7.13316	2.83454	5.58734	1.39175e-05	3.43054e-05	UP	137.1	137	137.1	23.6189	23.168	23.9315	6524.18	4779.76	2672.59	2402.74	10831.6	8925.33	5938.03	6911.64	18337.5	21203.2	6451.64	2630.94	8236.29	6985.68	10623.4	8979.1	4525	4400.93	7195.63	9217.37	12577.8	11320.2	98762.1	75.9553	1306.68	9298.74	44209.9	56785.3	52662.5	65116.1	100507	117396	45527.8	46272.1	143905	141622	59304.8
M121T24_1	6.55562	2.71273	4.57503	0.000162569	0.000185933	UP	121	121	121	23.9468	23.9324	23.9687	13307.6	8487.6	6399.29	8136.38	12117.9	9684.55	13763.4	11463.9	16671.4	13570.6	14870.5	10217	10749.2	9851.44	15860	17681.8	10167.2	10513	11022.4	19856.9	9379.28	9288.78	78407.5	447.22	39549.9	44376.6	35753.6	38063.9	42511.8	43495.6	60846.6	55050.2	82190.9	76405.4	64039.7	60969.7	249476
M83T16	6.45902	2.69131	2.07063	0.0508693	0.020215	UP	83.1	83.1	83.1	16.453	16.4426	17.0223	9476.31	6012.11	10218.3	7866.79	5881.14	25890.7	9041.16	8630.27	15920.7	20600.7	10019.9	5195.54	8680.22	5000.68	13376.5	8207.14	13500.9	12258.9	5519.4	7450.95	18761.7	14940.7	35769.2	4502.51	27638.1	15883.9	20762.8	28076.6	6314.54	13279.2	40832.3	25612.6	42417.8	49943.4	642980	52748.8	21094.1
M65T17	5.81415	2.53957	2.46287	0.0224393	0.0105807	UP	65	65	65.1	17.4012	17.0147	17.8896	61576.1	45652.5	26266.8	28959.5	105946	96082.7	73685.6	64969.6	203445	185803	54143	50207.2	50320.8	44870.4	80210	74714.4	48497.5	63146.8	119621	101815	84003.5	115210	431390	51.1603	8892.08	20130.4	225705	183845	357027	306233	377747	301220	161306	8025.67	2.76061e+06	2.64091e+06	346414
M92T31	5.63176	2.49359	6.787	7.50382e-08	3.5663e-07	UP	92.1	92	92.1	31.0384	30.5689	31.1802	2226.66	2494.07	2164.95	1586.17	1989.73	2367.79	1798.96	28667.6	1925.64	2596.55	1841.88	2515.44	1767.22	1341.83	1824.12	2564.55	928.379	1433.66	3164.7	5594.04	2060.21	2784.52	27742	0	22368.9	25356.2	31623.6	34575.3	13516.5	10694.7	16906.1	26453.8	15717.4	16046.2	27912.9	23780.9	16890.3
M152T23_1	5.38329	2.42849	4.79037	9.09624e-05	0.000114031	UP	152	152	152	23.1969	23.1853	23.2065	19411.6	5813.74	9298.72	8695.45	22646.3	18012.4	23011.5	8776.93	45581.6	43226	14119.4	14659	20007.3	17759.2	19076.5	18383.6	35494.9	31696.1	14014.5	15512	17273.3	11124.1	51648.9	800.768	143858	157240	64685.2	59178.1	108400	88469.6	187689	178527	106791	103716	52354.1	49652.4	46529.5
M138T17_1	5.22966	2.38672	9.20402	3.15612e-09	1.94459e-08	UP	138.1	138.1	138.1	16.7568	16.6997	16.7847	5119.66	1952.7	1933.36	1969.52	3778.38	5860.86	5346.86	3610.47	6578.87	3199.75	4381.12	2676.18	2941.1	2449.53	4609.33	2624.15	3982.59	2697.49	5067.83	4685.14	9500.61	9251.92	32764	236.535	10297.9	13187.4	24739.4	25592.6	31378.3	28856.9	24514	28578.3	28724.2	32957.2	18095.8	19094.5	23746.5
M41T14	4.93629	2.30343	7.95286	8.04082e-08	3.80291e-07	UP	41	41	41	13.7801	13.7742	13.9733	31629.4	22143.6	25804.8	25824	39352	42151.5	37727.3	23445.5	31978.8	33585.2	25962.8	27195.1	38575.9	24306.4	40709.3	32095.8	36707.6	30937.6	43646.7	31363.7	23889.8	25209.8	132126	1984.44	176452	171602	126300	111520	105467	108880	231027	229689	280414	272458	91719.8	110539	193345
M120T23	4.87426	2.28518	4.93473	6.33522e-05	8.77949e-05	UP	120	120	120	23.1953	22.7908	23.2051	50507.1	18845.9	24913.6	25360.3	46289.5	43203.6	51606.7	23907.7	102021	102205	37384.7	35388.2	37377.1	37401.7	41673.8	33483.9	82495.2	77062.1	40855.4	38819.1	39182.3	38499.9	115717	1473.74	297797	321265	143097	134043	234858	212058	389174	366894	221666	221296	140765	123766	100768
M57T16	4.77464	2.25539	3.60544	0.00160583	0.00119158	UP	57.1	57.1	57.1	16.4539	16.4419	16.7488	27044.5	13832.8	21437.9	14264.7	24074.4	22437.4	25836.6	24365.3	56887.1	56803.8	28214.3	18719.6	62891	15485.1	44164.1	29397.3	55530.9	61523	22079.1	46750.5	96988.6	68754.2	122832	313544	72224.2	58299.9	69737.6	116497	47897.9	49891.1	101932	136169	188220	183566	157662	182729	93143.3
M53T23	4.68526	2.22813	6.33843	2.39377e-06	8.14404e-06	UP	53	53	53	23.1893	23.1767	23.4384	4028.59	2462.28	4049.64	2448.54	2734.19	3388.64	4576.94	3436.52	7819.68	5813.91	4736.22	2926.03	3170.08	3343.51	3589.01	2139.56	4507.79	3095.27	3161.48	3901.04	3864.43	2764.88	17117.1	0	13886.9	14619.9	12062.7	13194.2	16519.3	14675.7	26553.2	26581.2	12167.4	17395.9	22173.2	19878.9	26116
M178T26	4.61926	2.20766	6.10954	3.77762e-06	1.20016e-05	UP	178.1	178	178.1	25.5204	25.5126	25.5245	3403.31	1838.1	1906.85	2523.16	7455.6	7400.99	6287	2378	5863.91	7591.84	3393.16	2926.44	3978.35	3619.8	3826.86	2723.47	4622.8	5506.51	5028.26	7553.69	4041.21	4224.84	27376	0	25040.4	16204.9	12385.2	10849.5	23722.5	26065.6	44714.4	37799.6	29981.2	37384.7	15123.1	13776.5	8581.31
M108T17	4.58419	2.19667	5.22724	2.93585e-05	5.65583e-05	UP	108.1	108.1	108.1	17.4017	17.0124	17.4617	68936.1	66280.2	32232.5	36664.6	149579	155918	61446.3	59999.2	172698	197484	47308.3	63036.8	43555.6	50165.6	86574.3	74919.6	65515.8	68330.5	157495	155441	151184	157844	1.00284e+06	0	14305.5	20874.6	342505	370163	365256	495037	388843	674133	329482	140058	764952	743301	703524
M94T17	4.57756	2.19458	4.45512	0.000182735	0.000204253	UP	94.1	94.1	94.1	17.3922	16.9902	17.4547	64243.2	50749.3	20583.9	6934.7	9818.66	145922	39758.4	56003.6	16099.4	202180	43659.7	49875.7	12294.3	42798.9	80237.6	76649.9	12724.2	64899.4	124184	139291	123038	138738	659683	0	8466.85	11840.7	211239	246440	358249	319770	13910.7	326769	16881.2	159910	765888	750195	462050
M138T17_2	4.56645	2.19107	5.55262	1.22691e-05	3.1215e-05	UP	138.1	138.1	138.1	17.4223	17.3639	17.6881	3716.06	2474.13	861.849	1111.16	7828.63	6505.73	3922.29	3752.17	10408.4	11802.8	3220.35	2009.9	2975.54	2836.66	3606.43	3774.81	3384.67	3466.47	8244.18	9157.06	7805.43	7564.51	44165.3	0	26236.6	585.501	12431.7	17560	21441.9	19362.8	24281.7	22314.1	9641.67	12567.2	47643.5	50377.9	29502.2
M145T23	4.49934	2.16971	5.78932	7.41571e-06	2.09599e-05	UP	145.1	145.1	145.1	22.6763	22.6699	22.691	6920.44	4675.93	3251.47	2646.12	7144	5756.03	5753.09	4072.06	9695.41	16094.5	5096.94	4591.89	7464.59	6424.82	12828	12131.5	6824.1	8791.14	14121	14160.2	5787.27	3432.44	27047.8	0	2115.1	2226.08	20127.1	20845.2	66870.2	56888.6	43768.6	38053.2	46957.5	47485.1	42905.6	36464.4	47041
M105T17	4.49392	2.16797	5.26952	2.41731e-05	4.99083e-05	UP	105.1	105	105.1	17.4223	17.3785	17.8915	73936.8	68203.6	21240.9	26203.3	133355	125135	43257.6	41199.4	151548	200976	44096.3	47769	44935.2	48504	77321.7	48978.4	64656.7	4787.88	162114	130524	156823	138932	751706	6009.64	91806.8	102605	188423	263725	388383	341767	461955	361735	177351	160992	855998	822267	502605
M110T19	4.47773	2.16277	3.87525	0.000789208	0.000665769	UP	110	110	110	18.5884	18.5848	18.5934	22241.1	10055.1	14599.6	12552.5	50905.4	47979.4	20859.5	13227.5	8063.29	8623.94	10227	9107.89	6725.65	4773.91	5360.1	3360.06	22681	24837.7	15003.4	19288	8181.47	9188.68	22121.4	1112.3	1043.25	955.211	53823.5	48343.6	266693	241742	92530	88958.1	82835.5	86957.1	55786.2	52378.3	71317.4
M133T17	4.40565	2.13935	4.94435	4.99984e-05	7.77774e-05	UP	133.1	133	133.1	17.424	17.1167	17.6089	37067.2	9557.1	15254.6	7727.94	73792.8	84850.3	23914.2	10654.1	109483	119966	38909.3	29248	22516.2	25853	39886.2	36549	37223.7	8623.17	91903.1	7402.31	78132.4	76653.5	372006	167.274	8054.32	8575.48	10460.1	144013	199163	196995	224080	215751	110157	182438	429884	419278	360016
M121T23	4.36672	2.12655	4.65402	0.00012581	0.000150251	UP	121	121	121	23.1931	22.7982	23.2025	13068.2	21345.4	8016.27	7144.94	28581	13127.2	15327.2	9130.43	32505.5	31368.6	12973.4	16853.1	11162.7	13017.2	15206.3	20824.7	21993.8	22777.3	12859.3	11787.3	11496.3	11892.7	37438.2	544.444	86773.9	96561.4	51223.9	22232.3	80827.4	71501	124606	115863	73497.8	75160.2	41071.1	45289.7	34657.9
M150T31	4.29994	2.10432	5.84934	1.02485e-06	4.00044e-06	UP	150.1	150	150.1	31.0422	31.0328	31.6285	1662.8	1394.77	2052.56	1664.53	1757.72	2720.08	2388.31	816.194	2189.42	2347.05	1550.19	2942.03	4073.5	1696.89	10044.2	14073.1	1382.86	7297.66	4979.57	31799.9	1742.4	1984.18	32452.3	0	30470.5	30549.6	1145.53	19327.5	16410.7	10526.6	23002.9	21457.8	20692.4	19712.6	23474.4	28503.2	23599.6
M47T10_1	4.29657	2.10319	2.74854	0.0094735	0.00516362	UP	47	47	47	10.4781	10.4739	10.5394	1178.7	410.46	323.607	288.675	519.176	929.92	1388.72	468.619	1929.83	1852.87	231.448	132.905	217.186	132.187	2179.84	2753.84	349.841	212.807	608.794	913.378	78810.1	74041.3	14824.8	0	95.3313	132.84	84695.7	74451.7	102762	93661.2	76354.6	72523.8	1645.01	1094.77	65972.4	63726.9	11802.6
M164T17	4.11001	2.03914	4.94128	5.14906e-05	7.90058e-05	UP	164.1	164.1	164.1	17.4099	17.384	17.9426	8774.01	5916.09	2259.43	2695.95	17741.5	16732.5	5616.83	5634.86	27706.4	25036.8	5661.68	5061.17	4600.63	3169.88	8474.54	8304.86	7526.64	6857.17	17645.4	16778.5	16095.5	17355.2	87341.5	0	894.853	1720.85	26340.4	29128.5	44942.3	43408.9	48099.7	47171.1	19022.5	22659.1	97355.6	97988.7	57989.7
M131T31	4.10887	2.03874	8.82781	7.03619e-09	3.95819e-08	UP	131	131	131	31.0344	30.9143	31.0423	60261.1	55511.5	27504.8	32096.8	50441.5	58251.2	73678.7	106740	46326.2	55240.2	57928.7	35044.6	42554	47469.2	47623.1	50330.3	45177.5	38791.6	38580	57836.1	63677.9	106741	308516	614.849	268996	292312	213048	202832	122675	198045	266507	280702	188066	191039	280357	343082	237551
M78T17	4.09441	2.03365	4.9461	5.05042e-05	7.81975e-05	UP	78.1	78.1	78.1	17.4154	17.0308	17.4584	20376.2	23452.6	10541.4	14428.6	48872.9	55083.8	2719.8	18325.9	80925.4	83314.4	16954.8	17147.1	15929.3	15253.3	30305.1	20683.4	20267.8	25272.6	65256	51145.4	52894.9	56866.7	279444	2696.23	8813.57	12844	77456	97824.8	127358	125195	147458	148001	82370.2	70111.4	313318	304279	187781
M120T17	4.09107	2.03248	5.01692	4.56911e-05	7.4033e-05	UP	120.1	120.1	120.1	17.4581	17.4216	17.4926	20035	17267	7578.42	5563.89	40856.7	45013.8	15203.4	16091.3	51360	58205.5	14068.1	16806.8	12519.7	13746.8	25727.2	15805.9	17224.7	16226.8	40777.3	36723	36345.7	35439.6	201342	0	1073.86	2803.33	62041.9	68474.1	115504	102027	117241	107965	53236.7	53167.4	234278	226943	139919
M70T14	4.05513	2.01975	6.67655	9.26632e-07	3.68165e-06	UP	70.1	70.1	70.1	13.7819	13.515	14.0945	4533.3	5669.95	8430.42	7979.54	7265.9	19099.3	6418.45	6839.53	6519.46	6792.16	9879.88	8969.19	10726.3	7790.18	8818.72	7230.38	10252.5	9532.82	6706.84	5987.33	5117.82	3326.25	25633.4	714.009	32618	27778.4	19841.7	41214.3	16319.1	27312.1	38563.9	56233.5	44990.7	71991.1	23271.1	31516.3	32287
M177T26	4.04032	2.01447	3.21775	0.00400878	0.00260352	UP	177.1	177.1	177.1	26.0908	26.0827	26.1028	6143.54	3920.5	5627.69	5058.05	4094.98	3036.32	5883.97	6030.47	8965.45	9253.9	6226.86	5007.73	5418.55	6192.65	15505.5	11972.4	7892.62	5009.54	2326.26	1612.71	1829.92	1970.52	20224.3	0	1293.08	1101.68	10356.9	10821.6	33053.8	28701.3	20166.9	20863.7	2519.21	3710.34	43386.1	40215.9	13738.4
M107T17	4.02094	2.00753	4.90439	5.88437e-05	8.46003e-05	UP	107.1	107.1	107.1	17.4101	17.019	17.4584	119777	111008	44477.8	59760.9	244555	222666	21784.3	79409.9	294788	331666	84337.3	89640.3	69814.3	64959.5	122210	118744	93944.2	100453	259552	235854	227250	267958	1.19854e+06	876.01	17748.9	28705.5	319565	439799	536099	603407	694288	628734	284273	307265	1.38016e+06	1.26665e+06	829919
M91T17	3.99411	1.99787	4.49605	0.000163816	0.00018709	UP	91.1	91	91.1	17.4174	16.9884	17.4584	144597	130813	63172.7	74786	281833	371383	71948.6	103195	400233	451482	88621.9	118218	95328.3	121179	206515	119114	155891	21077.2	329918	331403	296076	390004	1.67174e+06	354.359	29000.2	28635	519693	551624	739024	644676	934159	855811	409409	30482.9	1.8835e+06	1.82113e+06	1.19319e+06
M185T33	3.99401	1.99784	3.16799	0.00379596	0.00249074	UP	185.1	185.1	185.1	32.6105	32.3314	32.616	7177	5329.17	4474.14	6328.41	2234.23	6120.14	807.897	2440.81	948.305	1828.71	2273.5	9406.39	1651.28	3791.51	2720.74	2116.18	2143.42	2732.6	8221.96	7636.35	42968.6	45062	50310.7	0	112923	118547	13769.3	14153.8	9763.17	25943.9	12699.2	12794.1	15284	21898.1	12788.2	21361.5	14773.4
M159T17	3.96956	1.98898	5.69871	7.71847e-06	2.1648e-05	UP	159.1	159.1	159.1	17.4487	17.2379	18.058	16801.8	16002.8	5166.12	8254.14	35607.2	35772.8	17322.4	16727.2	57889.7	55914.1	13893.5	16477.3	14627.4	13056.9	23463.4	18505.1	16535.9	18633.3	39562.3	40191.9	35525.5	35941.2	172690	0	8609.3	9828.97	74726.4	79265.6	114611	96356.8	117088	110106	62542.6	72526.9	197553	193851	140780
M147T23_1	3.96059	1.98572	4.14492	0.000295351	0.000293962	UP	147.1	147	147.1	23.1777	23.1695	23.5837	2925.42	3435.57	3399.06	3312	3604.56	27674.1	4261.58	28401.6	3009.73	3540.12	1107.98	3614.98	21129.3	2593.77	2508.79	2592.32	3820.19	3911.09	3028.5	19950.9	3081.66	2703.68	36718.3	0	2082.92	2392.2	23898.2	23196.6	23593.8	27337	44689.4	44436.5	20237.7	20016	75066.5	83722.1	27820.4
M109T19	3.94688	1.98071	3.86771	0.000803555	0.000675957	UP	109	109	109.1	18.5888	18.4772	18.7814	19176.2	10902.1	12727.5	13339.9	47414.8	49877.2	24074.1	14409.3	9864.33	11858	11271.5	11149.9	5371.25	9092.64	8756.12	6339.38	22026.8	27250.8	17832.8	21135.5	9018.44	19402.7	21452.7	2358.7	2151.41	3278.46	50164.7	51889.8	247462	230839	87869.9	87183.9	81167.2	83357.6	49284.4	58807.4	72299.1
M119T17	3.93183	1.9752	4.80355	7.35194e-05	9.68536e-05	UP	119.1	119.1	119.1	17.4592	17.4235	17.4965	73579.1	61801	25312.7	25630.5	167333	169479	50531.5	45254.1	215144	243286	50559.4	56954.1	55165.2	46452.8	65399.3	70681.2	59773	78588	175320	165554	151049	141547	765566	201.606	9704.12	17072.1	215992	298383	404759	365850	464490	407426	196300	185674	901335	887503	539396
M89T13	3.90594	1.96567	3.81692	0.000815698	0.000684536	UP	89.1	89	89.1	12.5138	12.4517	12.7635	8211.65	3583.8	3140.11	3175.9	3940.28	6263.05	6293.28	5694.48	32170.8	5066.08	5831.55	19888.3	5345.42	4098.25	8643.34	2887.16	3645.93	915.152	23654.5	843.775	9719.07	9263.42	54086.7	34.7011	5473.08	19504.8	51536.1	35723.5	11560.6	8633.72	22036.1	16957	16144.7	16872.6	61106.5	54902.5	10208.2
M134T17	3.88763	1.95889	4.9661	4.92846e-05	7.71777e-05	UP	134.1	134.1	134.1	17.4577	17.4235	17.497	19717.3	16492.6	9700.76	10378.5	48986.1	49106.1	17835.9	23769.6	73234.2	70085.1	19588.2	18528.5	14932.4	14361.9	23568.1	24233	26773	18214.2	57604.8	43683.3	42139.3	52770.2	234016	126.072	4329.29	5348.31	71736.4	88439.3	135230	124381	141669	136060	61359.9	57459.5	272274	269784	164972
M96T16	3.80513	1.92794	5.19811	3.12441e-05	5.88847e-05	UP	96	96	96	15.9334	15.9101	16.4289	69830.4	36296.6	45746.4	47494.4	98738.3	97102.6	71504.2	38204.4	65029.7	57378	58550.8	58515.5	60918.1	54976.5	46768.2	46746.1	79572.1	83128	76941.5	157073	28380.6	32218.4	220248	1372.47	6117.11	4926.21	78232.7	67698.4	479171	454058	375239	367867	360107	352711	277065	273521	258483
M171T33	3.79185	1.9229	3.04201	0.00517718	0.00321771	UP	171.1	171.1	171.1	32.6082	31.9362	33.0846	4301.12	1794.12	1411.11	9463.61	937.909	2522.09	481.571	838.953	264.36	742.287	1263.8	3090.05	5325.79	1666.84	1052.78	1493.09	601.237	685.97	2971.71	1767.58	21655.2	20403.4	22515.8	394.778	55514.1	57757.5	5826.02	6291.16	4818.81	14523.7	7302.11	4819.5	6334.44	8267.25	7031.95	7933.27	6191.36
M241T33	3.78739	1.9212	3.21276	0.00329853	0.00221783	UP	241.2	241.2	241.2	32.6085	32.5976	32.616	26697.9	16072	17718.5	19996.9	7969.49	20222.4	3093.93	6559.12	2523.16	5186.74	5634.11	29384.7	6419.35	11653.3	9196.96	8719.49	7996.25	8841.51	26085.4	18704.3	145510	131486	145203	0	329201	342017	43086.1	47176.8	28367.1	89641.3	42811.6	40460.6	53043.3	64126.7	41632.2	59988.5	48164.5
M92T17	3.78644	1.92084	5.0924	3.32178e-05	6.1214e-05	UP	92.1	92	92.1	17.412	16.9909	17.9017	8925.89	32810.4	8830.51	17789.5	79503	74212.4	12753.1	23802.8	102175	96292.6	25820.1	24233.4	20971.9	21895.1	42682.8	42746.5	33558.9	31078.2	72187.9	76189.9	71017.3	72943.5	325588	0	5368.51	9568.44	121680	124887	182598	158930	188466	176261	89694.3	86574.5	365864	357981	234152
M101T33	3.77009	1.9146	3.14674	0.00412047	0.0026618	UP	101	101	101	32.6123	32.6016	33.0947	118774	118971	100617	73808.2	67476.3	105727	49041.5	66384.6	123009	40189.8	57462.6	70137.1	50435.5	62323.3	51243.3	57420.2	53385.4	55549.9	128703	128662	712177	648513	809869	525.661	1.8224e+06	1.92722e+06	266862	277940	148567	442408	242072	218597	107915	378168	247995	348286	249791
M122T17	3.75113	1.90732	4.88213	5.41837e-05	8.114e-05	UP	122.1	122.1	122.1	17.2965	16.9903	17.4623	14460.5	11183.3	9302.18	12420.7	57028.4	63841.6	15922	25943.8	82262.2	79218.2	14366.4	13214.8	14489.4	14533.3	30315.5	28188.6	14351.6	24460.6	64633.2	61379.3	60679.8	59985.8	266356	0	5082.63	9034.01	97134.1	100873	151587	136404	157728	149128	71260	76841.4	302438	55434.9	189077
M95T16	3.74493	1.90494	5.28469	2.53961e-05	5.14372e-05	UP	95	95	95	15.9334	15.9101	16.3657	66739.6	38507.2	47774.7	42871.3	96441.8	93288.9	83209.5	38049.4	62107	59275	60848.1	51014.8	59043.5	50838.8	46262.4	46822.3	77137.8	79560.9	76281.2	152894	45974.8	29350.9	210627	2268.49	7442.74	7777.35	77195.2	79670.8	461381	440781	362176	369222	345368	361578	274385	276763	259465
M88T33	3.73197	1.89994	3.2013	0.00333722	0.00223954	UP	88	88	88.1	32.6082	32.5976	33.0947	289706	212302	172917	188339	92777.2	141302	61477.9	99153.9	48763	68206.2	90042.3	284926	84673.6	114985	96031.7	100860	95292.6	30972.9	269058	29984.3	1.5241e+06	1.36684e+06	1.46026e+06	866.176	3.29635e+06	3.38219e+06	489423	380023	313306	903530	422025	404318	546250	675754	413025	629570	504797
M63T23	3.67658	1.87836	3.68861	0.00133168	0.00102765	UP	63	63	63	23.4196	22.7986	23.4279	13379.9	11312.9	10138.1	9130.39	7184.16	9921.05	13088.1	16109.1	8695.98	20007.1	12398.5	11393.2	13587.8	13380.8	15112.2	4778.38	6990.77	9753.67	11128.5	13784.6	18586.3	20023	44544.1	0	28201.2	20488.1	22011.3	24600.9	32227.4	29138.9	81508.4	76597	16936.5	16435.6	146123	153440	20320.3
M182T26	3.66201	1.87263	6.47588	1.37287e-06	5.04515e-06	UP	182.1	182.1	182.1	26.1025	26.0983	26.1065	3940.9	2389.89	1535.72	1979.64	5236.58	3889.03	2952.73	2186.46	3500.88	5410.32	2359.75	2853.96	1746.39	1539.19	1898.27	1940.13	1871.3	2667.04	2908.58	3473.53	2532.96	2573.65	14759	0	2236.88	5657.21	9840.02	6540.26	5746.14	4930.81	11611.2	9552.95	8893.25	13354.9	16372.4	20452	10508.7
M145T26	3.64186	1.86467	2.82006	0.0100588	0.00541521	UP	145.1	145.1	145.1	26.0908	25.7534	26.3444	9385.36	5346.72	9286.03	5500.77	6772.01	9343.96	9576.48	6386.58	8856.32	13498.5	10804.3	7859.78	9615.78	8093.03	22971.7	17104.7	11056.9	8299.92	2155.47	2318.01	2525.12	3965.61	22108.3	169.997	1768.55	2867.27	13391.1	14535.6	48395.1	44478	25441.6	8406.22	2988.52	4555.21	58189.4	56234.1	18668
M151T17	3.63788	1.8631	5.00443	4.38999e-05	7.23826e-05	UP	151.1	151.1	151.1	17.4108	17.2888	17.4547	36260	29323.1	15052.7	18828	78866.7	74559.8	35939.4	35278.8	107609	103245	25569.4	29247.7	23617.5	19754.9	38942.3	40392.1	35509.9	36146	83480.7	81742.9	75965.3	78530.7	346030	88.198	4841.04	8339.01	129581	129198	194211	174151	199083	189894	97750.1	102234	394050	385994	243484
M106T17	3.62706	1.8588	6.18129	1.96823e-06	6.84546e-06	UP	106.1	106	106.1	17.4022	17.3677	17.9346	20086.4	17068.2	20915.9	13366.5	40464.6	42946.8	16767.2	9154.27	54826.7	7376.54	15350.5	13265.7	12582.7	21659.6	13637.7	21039.3	14076	20898.8	35472	45403.7	32215.6	41829.9	166746	29892	76311.1	91612	50715.6	59463.4	81072.1	83831.5	97924.6	94392	51504.8	46854.7	180286	19515	118074
M127T11	3.62257	1.85701	3.37679	0.00238095	0.00167947	UP	127.1	127.1	127.1	11.3386	11.2964	11.3982	2802.35	1461.52	1692.65	4295.38	18311.3	18329.9	2592.44	1472.16	6063.12	5557.17	4699.61	3605.32	1170.4	914.309	2111.65	1094.14	17931.4	18300	1480.09	1327.92	4452.17	5517.48	26079	0	131.506	0	57724.2	56473.4	14786.3	13043.1	55143.3	52368.2	29490.5	30432.5	6236.55	7237.69	24380.9
M157T33	3.56205	1.83271	3.17779	0.00358245	0.00237523	UP	157.1	157.1	157.1	32.6082	32.5966	33.0885	48095.4	28756.4	29400.9	32798.6	12536.5	30948	11345	13158.8	5070.85	9965.71	14671	47740.3	13572.3	20016.9	17371.3	14753.6	13354	16199.5	44989.8	35698.6	235253	212464	231464	1801.92	519701	539275	73652.2	75216.5	48662.6	144323	67022.5	65590	81564	104934	70358.3	99516.1	78232.2
M109T17	3.55704	1.83068	4.96425	4.88004e-05	7.67663e-05	UP	109.1	109.1	109.1	17.4101	17.3712	17.4547	70196.2	67191.9	39381.9	32375.7	163606	157396	70367.2	69571.5	215474	201022	61430.9	67078.1	51649.7	37719.1	82962.4	75771.3	65835.1	70947.2	153469	168098	150952	151938	675027	1045.66	11684.5	14203.7	251775	257689	370822	343084	416239	385975	203217	211789	786233	765416	468813
M51T23	3.54639	1.82635	3.85679	0.000885638	0.000733158	UP	51	51	51	23.4202	23.1891	23.4312	6065.55	6880.74	6539.16	4687.02	5660.81	8534.66	8371.88	11296.9	11726.7	12209.1	8130.49	4581.66	8212.99	7879.06	8422.8	8570.91	4579.68	6492.45	9332.07	9902.79	14291.9	12599.6	38614.5	0	12866.5	14667.9	18627.2	16968.6	18360.4	17814.9	51867.3	50816	12586	14491.3	99400.3	93963.3	21777
M149T17	3.53432	1.82143	4.94603	4.80296e-05	7.61037e-05	UP	149.1	149	149.1	17.4061	16.4989	17.4541	149115	131311	63954.7	73420.7	306943	303908	132320	148426	417890	423798	3924.38	119515	40090.2	108802	178691	159352	146705	148665	323828	307329	301760	302936	1.30102e+06	219.545	18469	34383.6	474136	492858	734464	659041	764405	725094	372255	388000	1.49474e+06	1.46058e+06	912923
M137T17	3.51075	1.81178	4.95245	4.84539e-05	7.64697e-05	UP	137.1	137.1	137.1	17.4096	16.9983	17.4547	42603.3	38342.8	18869.5	18301.8	92030.7	87510.5	44319.8	8826.14	122940	123876	33248.4	37080.3	33237.6	29496.8	55276.9	45896.1	42861.8	40216.5	93634.7	92924.6	84750.2	87315.4	382329	592.237	6571.06	12170.6	139235	144907	215678	191099	225394	213440	110962	115555	437952	429344	268981
M89T33	3.4965	1.80591	2.98917	0.00571709	0.00349044	UP	89.1	89.1	89.1	32.6082	32.5926	33.0984	41465.7	33424.5	35225.9	31164.4	15243.7	28652.5	9107.35	11057.2	5161.05	9394.21	13108.3	44826.1	13165	17619.6	15190.6	10683.9	11767.7	14967.8	45878.8	40732.5	249445	223780	246552	1044.94	533075	552077	51645.9	71219.7	29785.9	146452	68137.2	65691.7	84082.4	101545	54386	91363.1	76489.6
M163T17	3.47137	1.7955	4.86039	6.17065e-05	8.65923e-05	UP	163.1	163	163.1	17.4123	17.3714	17.6274	47822.5	49595.2	17118.6	23778.6	115654	111478	44873	52931.5	154570	154713	37120.4	39380.3	39537	37956.9	63215.4	54108.6	47053.7	52860.8	114175	107037	106919	112771	472176	0	7625.57	9858.26	164270	179644	267777	240768	276133	264057	133217	132871	547015	534608	331811
M239T33	3.46925	1.79463	2.99679	0.00579842	0.00353069	UP	239.2	239.2	239.2	32.6082	31.5773	33.0947	22128.3	15335.8	13076.6	17335.3	3967.48	15042.7	13673.5	13528	7293.73	4914.69	3955.03	23671.7	6556.97	24477.7	7749	7751.45	6314.06	8406.23	22274.8	19187.2	121699	100917	118121	0	271172	291743	5581.06	39133.2	24892.6	72052.9	34581.6	32749.9	39433.6	53771.8	36548	51094.6	38708.5
M122T21	3.46013	1.79083	6.68565	5.63637e-07	2.39773e-06	UP	122	122	122	20.75	20.7416	21.0297	14538	5663.6	6038.99	6027.02	23108.6	22008.8	13641.5	9301.82	14432.4	12353.9	10208.1	9568.66	10158.7	9652.4	8182.71	7024.01	8761.87	6590.33	23549.8	23244.7	9570.08	9926.11	32398.6	38.6594	21754.8	23973.7	47688.6	46305.4	51169.3	50517.2	32991.7	33150.6	45857.3	43070.7	53127.3	50890.2	18906.6
M242T33	3.45906	1.79038	2.26318	0.0319582	0.0141643	UP	242.2	242.2	242.2	32.612	32.6041	32.616	3632.33	0	1689.16	2317.31	1006.75	2641.22	557.181	521.781	222.518	821.264	1203.78	3661.92	818.911	0	1641.42	914.646	626.709	741.052	4387.09	3639.06	22646.3	19859.2	0	3890.54	47381.1	58819.1	0	7064.38	0	12905.3	6448.62	0	8517.39	9630.19	0	9138.06	6756.97
M158T33	3.45803	1.78995	3.12178	0.00393922	0.00256691	UP	158.1	158.1	158.1	32.612	32.6004	33.0924	2953.25	2293.21	1959.53	3006.89	889.672	2252.68	891.622	1030.01	350.822	416.691	859.554	3827.76	870.042	1456.88	1723.44	721.92	964.57	655.266	3116.94	2531.88	18907	18337.6	15107.4	314.974	45501.9	4535.06	6748.78	7040.07	1863.65	14739.5	5785.44	5816.27	6473.82	8583.49	5906.89	8977.12	8363.21
M150T17	3.45453	1.78849	4.88088	6.0747e-05	8.59353e-05	UP	150.1	150.1	150.1	17.4099	16.738	17.4541	66317.1	54288.4	24250.7	30138.7	128227	127356	62032.1	60213.4	174548	169873	50846.2	47571	49795.5	42205.7	75017.9	63536.4	58069.1	57258.2	127596	127709	120973	128998	547939	0	5849.82	16353.1	196375	202671	307695	277179	320711	303865	152027	161991	633753	622545	385389
M136T17_1	3.44312	1.78371	4.91325	5.53384e-05	8.20239e-05	UP	136.1	136.1	136.1	17.4137	17.2714	17.9021	227200	197407	102858	121892	490618	490332	210191	222968	642471	670437	170786	181905	177729	187259	270715	251514	235336	230966	496971	500191	479304	480110	2.09133e+06	0	36989.9	66602.9	756687	795877	1.16842e+06	1.06052e+06	1.22313e+06	1.16711e+06	588099	596043	2.37213e+06	2.32648e+06	1.47797e+06
M93T23	3.42344	1.77545	4.56265	4.95059e-05	7.73645e-05	UP	93.1	93	93.1	23.4286	23.1931	23.6853	4921.8	5135.05	4769.67	5445.02	4175.47	5805.76	32819.6	4843.66	73746.3	8107.86	6558.05	7002.98	7637.01	5782.11	7397.84	5114.55	5572.74	3785.55	9023.56	7039.96	5670.52	5900.69	68784.8	171.56	31619.2	38464.6	11472	30286.5	19282.7	19880.5	45198.7	45818.1	14868	26749.2	64403	63611.3	57523.7
M97T23	3.34857	1.74354	1.99401	0.059224	0.022584	UP	97.1	97	97.1	22.7999	21.8722	22.8218	56028	41142	33984.2	22738.7	28534.4	26913	57938.1	55562.8	55361.3	54174.8	43435.4	33843.2	30678.6	33212.9	30612	30087.7	44898.2	41498.6	41536.2	38444.1	28960.6	23202.9	37396.8	2583.37	30944.3	40350.8	37107.3	41137.2	52492.9	53498.3	52047.2	61204.2	73854.6	86373.9	808594	707994	43817.7
M192T17	3.31012	1.72688	4.84332	6.61157e-05	8.99385e-05	UP	192.1	192.1	192.1	17.4094	17.3751	17.4508	546482	475926	236751	245930	1.06786e+06	1.0674e+06	556385	548088	1.49938e+06	1.46974e+06	459152	448303	419461	402920	646544	570666	509039	515292	1.10334e+06	1.07072e+06	1.0501e+06	1.09162e+06	4.52088e+06	0	93164	170425	1.65354e+06	1.69532e+06	2.57453e+06	2.28197e+06	2.67951e+06	2.52372e+06	1.27617e+06	1.3495e+06	5.22575e+06	5.14257e+06	3.15918e+06
M164T23	3.29734	1.7213	2.77049	0.0113222	0.00595776	UP	164.1	164.1	164.1	23.4223	23.4119	24.0211	58668.5	79620.6	51222.4	60223.8	81168.8	52701.4	46782.8	91842	125307	145326	78626.3	58723.3	81590.1	58818.8	81264.3	90156.1	66912.3	50803.1	95799	62856.6	139536	163559	318720	0	105025	110212	111085	149916	197174	161050	527601	490300	97252.5	93117.6	1.11025e+06	1.1082e+06	30042.6
M126T11	3.28875	1.71754	3.39675	0.0022745	0.00161526	UP	126	126	126	11.3506	11.3131	12.0398	48779.7	31705	24643.8	69941.2	261576	213783	62457.5	41497.2	75948.6	75477.3	83791.7	75123.8	16202.8	13042.1	43374.3	32321.3	259064	214946	22493.1	25422.2	56068.3	65722.3	348318	36.0029	471.679	242.962	788713	664329	212596	166432	713313	683186	423647	398139	112063	117486	286920
M157T29	3.28376	1.71535	4.84988	6.17442e-05	8.66179e-05	UP	157.1	157.1	157.1	28.7739	28.7694	29.4082	20675.9	15969.7	12788.2	16317.1	6026.03	12680	7964.8	19243.3	6398.94	5799.77	10960.8	23558.3	13193	12532.5	7883.9	4299.86	8507.18	8698.56	31411	24401.2	32346.6	24016.9	48265.3	25924	110881	118174	37410.2	22265.5	43203.1	42376.3	47887.6	28336	45344.4	41844.7	40571.4	48014.1	25466.8
M125T21	3.27418	1.71113	5.29216	1.86978e-05	4.22685e-05	UP	125.1	125.1	125.1	20.9906	20.9823	21.2911	8700.97	2966.66	3158.82	2605.67	4741.59	5254.35	5922.94	4599.85	16637.3	15212.7	6230.99	11087.4	5423.79	4134.31	14360.1	6856.42	5316.95	4437.48	8041.53	11614.3	6204.08	5657.67	18548.9	721.851	8240.7	8522.51	12135.2	13730.8	47899.5	44271.1	32973.4	31596.7	23759.9	26946.7	24689.3	27025.4	18472.2
M177T17	3.2719	1.71013	4.83153	6.83518e-05	9.19754e-05	UP	177.1	177.1	177.1	17.4099	17.3751	17.4547	325805	289202	157328	168616	639992	646372	327276	328984	885497	876484	274610	264569	256716	245318	382163	342199	312175	310288	667536	642055	621218	647752	2.67876e+06	55.8011	64019.7	105186	978427	1.00682e+06	1.52612e+06	1.36366e+06	1.58206e+06	1.49947e+06	767946	798344	3.10777e+06	3.05713e+06	1.87403e+06
M68T14	3.27061	1.70956	4.92448	1.54827e-05	3.70667e-05	UP	68.1	68	68.1	13.78	13.5145	14.0669	16080.1	1885.3	1529.48	2013.79	4445.61	3485.28	3503.19	1955.04	18785.9	4153.12	2429.04	1959.72	4090.08	3258.27	5006.04	3014.82	2857.16	3139.04	33964.6	6571.86	2383.41	1670.53	17214.7	0	22523.5	20688.8	22210.1	13967.3	9222.08	12101.3	29386.7	28814.5	30914.2	30256.4	12924.8	12699.5	24781.6
M65T23	3.25427	1.70233	3.26875	0.00362256	0.00239711	UP	65	65	65	23.4198	23.1815	23.4282	40031.2	41429.3	32745.9	30432	33255.2	26543.1	44687.3	54813.7	65217.5	63506.9	45536.2	42492.7	42450.9	38498	46319.8	44633	34426.2	29106.5	43035	53822.9	57274.8	67160.1	177620	0	42234.6	67786.9	88116.5	61030.6	107998	95668.4	245995	248437	60585.4	50097.2	514407	518145	67701.1
M88T27	3.22628	1.68987	3.75358	0.00103789	0.00083828	UP	88.1	88	88.1	26.9843	26.7264	27.0044	2477.01	1236.58	5173.5	2878.25	5734.62	6100.33	3693.53	876.692	2398.37	3755.02	3690.27	3760.33	818.461	1010.87	2611.32	2646.02	4838.91	4287.86	7297.88	7586.17	8090.5	8942.01	8230.03	40.8003	869.116	41534.8	28917.4	10403.2	22122.4	18871.9	29297.1	29392.7	8460.79	7570.64	11844.7	12438.5	15798.3
M147T23_2	3.22586	1.68968	5.27557	2.30602e-05	4.84646e-05	UP	147.1	147.1	147.1	22.6738	22.2557	22.691	3784.63	1740.51	2733.17	2348.32	3045.39	4734.57	3278	3826.91	6243.42	6629.65	3779.95	2360.45	4948.15	3588.51	8621.38	5980.2	3714.3	3449.53	7558.96	6548.03	2672.94	2519.28	10190.7	42.3603	2073.67	1152.18	7810.64	9663.16	22982.9	24927.2	16838	18116.5	18875.4	14663.4	17403.9	14330	18366.4
M95T11	3.21771	1.68603	3.55751	0.00151448	0.0011372	UP	95	95	95	11.3488	11.2936	11.3945	5535.09	5599.86	7425.9	6918.83	25334.6	26137.9	5971.54	2454.6	7161.71	6490.43	11298.4	8517.57	3125.16	1544.96	5033.67	4038.61	25559.6	26624.8	5070.21	3174.36	5429.23	6915.05	36349.6	902.995	1008.61	1336.94	77661.3	79030.6	23501.7	18632.5	75603.2	75557.3	38496.9	45204.2	14908.8	20248.5	32266.3
M82T11	3.20774	1.68156	3.0386	0.00570462	0.00348425	UP	82	82	82	11.3501	10.892	11.3945	65831.4	53788	58729.3	49825.9	294163	209624	69839.8	57451.6	99849.6	97768.5	139418	102277	25672.7	24782.7	52549.5	51865.1	310099	244461	33931.8	23726.8	80731.7	77815	355582	1670.76	2248.49	1316.81	1.05541e+06	843631	275611	192953	957544	915394	4751.72	475698	165398	166766	393591
M102T33	3.15484	1.65757	3.31531	0.00266035	0.00184753	UP	102.1	102	102.1	32.6082	32.3444	33.0885	44598.6	15561.6	8329.3	13881.1	2791.78	14022.9	47926.3	8424.31	5140.32	5200.54	8481.64	41444.4	5834.47	5345.49	6488.7	6583.47	8623.83	20480.9	17227.9	12876.9	67817	73398.5	79389	137.831	161420	169389	24069	28190.6	18636.1	54485.6	117431	25807.3	26765.6	33021.6	24093.4	34787.2	33732.1
M98T11	3.13359	1.64781	3.29932	0.00287804	0.00197639	UP	98	98	98	11.3488	11.2982	11.3945	17908.6	8273.95	16251.1	19005	79804.7	76145.4	13692.1	13340.1	24834.1	23023.6	31148.2	24249.8	6995.94	6264.39	13538.1	9521.16	83287.1	75410.2	7556.36	7924.03	26782.1	21325.2	111452	804.773	330.589	257.27	240656	228263	64720.7	56205.4	226544	218756	119073	122504	33613.8	38248.2	94485.2
M92T23	3.09295	1.62898	3.27123	0.00357323	0.00237019	UP	92.1	92	92.1	23.4158	23.1777	23.4235	26318.8	57553.7	41599.7	42652.2	51175.6	47049.7	24496.1	53183.8	72760.1	77112.5	51545	45083.6	57940.5	52459.7	62420.2	55689.8	37968	40483.3	56904.1	54477.2	90536.6	87653.1	212277	0	71546.1	80834.9	90756.9	86814.9	124144	117404	304721	287768	67013.2	67036.4	586927	582333	79817.3
M51T11	3.08253	1.62411	3.28078	0.00293488	0.00200962	UP	51	51	51	11.3411	10.7694	11.3945	7376.33	5710.97	12855.9	13280.8	50739	49457.5	9402.98	7156.81	13988.7	13710.9	15791.5	12839.6	4687.37	2039.04	6355.65	4734.16	46120.9	43727.4	5149.66	3022.51	11117.7	11898.3	66469.7	0	338.59	155.811	135981	119039	34833.7	35146.2	133560	125339	63979	73818.4	23221.6	18194	55042.5
M53T11	3.0775	1.62176	3.40677	0.0021992	0.0015693	UP	53	53	53	11.3497	10.9097	11.3945	27844.1	27720.5	53390	53272.5	202383	164024	48685.3	38717.6	74805	53696.9	76697	70947.7	17639.4	15506.2	42082.8	33529.3	219186	184653	27796.2	15458.7	63105.6	40829.7	273829	591.249	2267.72	10101.9	583126	508827	166568	159687	569379	546772	314723	334238	98011.9	94931.8	221163
M100T27	3.05586	1.61158	3.6136	0.00135079	0.00103938	UP	100.1	100.1	100.1	26.9896	26.9441	26.9994	12468.7	1797.76	11811.9	14375.8	25764.6	25203.4	9522.75	1515.48	3508.69	6723.61	14096	14715.1	2846.08	3964.39	8426.15	5723.83	14499.7	18661.3	29555	33736	36497.2	35436.2	34872.8	0	856.869	773.918	46254.3	45129	93896	90936.8	131096	127156	40123.3	39230.6	50657.1	57233.6	65077.6
M56T18	3.0093	1.58943	4.93812	5.15102e-05	7.90217e-05	UP	56.1	56.1	56.1	18.1029	17.6401	18.4358	183170	120078	96176.7	88720.1	113721	17342.9	115252	92987.8	114574	135912	16121.8	119950	120949	111348	118659	84300.3	111763	128879	169038	147395	22479.2	22313.5	333019	5405.7	256663	281401	301800	356626	173468	197005	329854	291645	756829	801053	261415	236800	485663
M151T37_2	2.99823	1.58411	3.94757	0.000626377	0.000546636	UP	151	151	151	36.7287	36.7242	36.7488	4962.69	4378.21	4816.19	7656.37	7949.56	15580	7822.51	8742.96	1516.16	1552.95	8603.97	5081.45	15260.5	8134.08	5065.41	2969.25	6502.12	3136.36	5564.12	5002.82	5916.93	7127.47	9563.28	1007.5	4896.31	2602.16	26307	18172.8	27260.3	22063.8	18304.1	17686.6	38454.2	55355.3	29013.5	54223.9	13576.2
M88T29	2.9753	1.57303	4.21238	0.000344183	0.000330278	UP	88	88	88.1	28.7772	28.7694	28.9609	107386	104920	49058.7	90714.7	64466.4	73012.3	85822.4	126231	64699.2	36658.2	78454.2	156351	109737	97534.3	68693.2	68996.7	86460.3	43528.5	161150	155734	170188	149494	308035	288.106	699584	714483	250250	111371	264013	248773	329074	160812	246125	249580	240142	292960	158194
M87T27	2.96644	1.56873	3.45559	0.00199633	0.00144325	UP	87.1	87	87.1	26.9915	26.8326	26.9998	49383.4	6319.73	53955.7	41404.9	95728.5	80942.9	34585.4	3854.24	13650.2	26842.1	47940	58230.4	13059.7	14224.8	23703.8	17865.9	55614.4	50147.6	94450.2	121894	131126	136110	120548	297.664	1369.03	12508.2	164210	176037	296690	331296	452250	479225	147495	136478	179308	200122	227951
M97T11	2.94406	1.55781	3.3072	0.00280021	0.00193058	UP	97	97	97	11.353	11.2946	11.6928	40540.5	26826.1	44749.4	42251	180298	165811	44232.5	30523.9	51091.9	54909.8	57316.3	60627.6	14271.3	13990.1	30027.5	31728.3	168473	167165	21252.6	19410.6	55751.8	49510.4	230726	134.663	2137.28	2125.91	506276	471090	135826	118063	463916	438987	267266	269307	82358.7	84345.6	212601
M50T11	2.93708	1.55438	3.133	0.00425565	0.0027315	UP	50	50	50	11.3462	11.2898	11.3772	4910.99	3919.55	7125.31	6880.02	24872	25966.6	3686.73	2396.92	8560.15	7918.67	8311.73	8528.66	1818.79	1387.78	4291.18	4074.62	23701.6	24646.8	1758.11	2050.9	6944.88	5790.5	34011.4	0	236.022	39.131	74376.1	64444.9	19271.3	19122.7	67340.9	64535.4	36176.7	31056.6	9606.64	10366.7	28251.9
M182T24	2.90875	1.5404	5.59067	9.71957e-06	2.6023e-05	UP	182.1	182.1	182.1	24.3835	24.3723	24.6252	16567.8	9112.92	6444.43	7059.82	21929.8	20972.7	17683.4	16537.9	22033.9	24418.8	14342.5	14056.5	8188.86	6472.87	11536.5	5782.17	15296.2	12586.9	19816.2	10809.3	14071.7	12610	57217.9	0	3856.09	12463.9	32977.6	27727.5	34366.5	30825	48596.1	51698.2	29255.8	39878.7	82729	91377.3	43306.7
M119T23	2.89471	1.53342	3.32541	0.00317226	0.00214639	UP	119	119	119	23.4202	23.1786	23.4282	11099.5	14495.1	12593.7	9779.63	9617.78	9975.19	11724	16501	17094.1	14690.5	12674.9	11609.3	14212.1	12864.3	13958.9	13257.5	8067.49	7605.55	13635.7	13191.9	16899.1	17317.9	48882.4	42.2341	15369.9	19744.6	24623.2	23273.3	28054.5	25219.5	66653.7	64015.8	13908.6	18134.7	125054	127805	17573.4
M69T27	2.86756	1.51982	4.30656	0.000233507	0.000246896	UP	69.1	69.1	69.1	26.9905	26.9441	27.1223	58994.8	50526.8	59205.6	59328	112655	124593	50705.7	12182.4	82468.3	97558.6	63760.9	54891.9	15968.3	60486	48824.1	32536.6	84654	96426.2	145393	175399	155145	156812	152613	1295.72	88677	5549.58	164569	200627	412057	408821	589767	582838	290395	160035	228744	217656	287089
M81T11	2.86415	1.51811	3.25751	0.00315443	0.00213623	UP	81	81	81	11.3506	11.2898	11.3945	277145	174920	300031	296300	1.16431e+06	1.10262e+06	273229	200670	355003	355519	436419	412787	102132	92339.5	194223	189777	1.11666e+06	1.07547e+06	131790	123016	372224	332755	1.50628e+06	1979.22	4779.39	8627.59	3.20754e+06	3.01242e+06	888549	782684	3.00436e+06	2.89427e+06	1.72808e+06	1.74306e+06	554285	539377	1.34154e+06
M172T24	2.85661	1.51431	4.7268	8.06711e-05	0.000103702	UP	172.1	172.1	172.1	24.321	24.3001	25.0052	6038.38	6699.27	2937.21	2267.73	10854.6	10550.3	2341.34	3880.56	9185.03	3062.97	4435.85	3549.99	4573.69	6707.71	7460.87	8961.58	3471.66	8855.03	11352.5	7485.26	3656.85	3182.45	23758.9	0	37861.7	39525.7	11409.9	18340.3	15329.3	4711.46	22807.5	26641.1	6717.44	8003.29	22233	24358.6	22363.8
M52T26	2.83898	-1.50537	-8.49406	1.38692e-10	1.67477e-09	DOWN	52.1	52	52.1	26.0361	25.997	26.968	342509	434087	390455	436809	279747	274986	251568	338329	286701	389623	321082	403331	429219	522594	421593	322419	224104	321724	467274	543042	478034	444814	71709.7	63.2973	108837	79316.1	129429	253949	249201	78108.2	98289.2	116375	128632	125313	154752	231502	34529.4
M105T21	2.82157	1.4965	6.4862	7.76025e-07	3.17011e-06	UP	105	105	105	20.7447	20.3758	20.7717	58240.2	32204.3	30915.3	29214.1	89266.1	84417.5	64987.9	45403.6	75503.4	68831.7	48375.5	44786.5	35532.7	33222.6	39242	28981.6	39152	35013.3	97228.9	88912.3	52733.1	47015.3	131722	464.2	84258.3	92185.8	169861	160463	202554	181548	132745	121885	152766	152946	191060	174940	68440.3
M158T25	2.81569	1.49349	4.05234	0.000488121	0.000441396	UP	158.1	158.1	158.1	25.4696	25.4625	25.4736	7520.43	6514.83	3876.83	3130.92	12736.9	14405.6	6099.09	9340.28	15113.6	19177.2	6156.2	6008.11	6178.93	4781.85	12703.6	11263.4	5417.3	6437.67	7397.23	8662.89	11929.1	12072.7	50780.9	0	421.925	296.652	15002.1	15873.8	19422.1	17137.1	38813.8	36035.3	17275	18568.4	46375.9	45162.8	34784.6
M227T32	2.81491	-1.49309	-5.28119	5.99743e-06	1.75893e-05	DOWN	227.2	227.2	227.2	31.9333	31.9287	31.9416	17852.5	15270.3	12427.2	11516.4	6316.77	9696.44	25705.2	21119.2	13359.1	9357.15	19502	4456.26	15407.6	12181.7	6209.15	17182.7	19609.6	11915.4	4379.16	3309.36	7984.91	11702.8	7007.13	1057.9	1350.02	2550.36	8830.07	1347.33	8429.54	1462.31	8160.67	495.661	11261.8	727.861	868.177	560.874	9840.47
M99T27	2.81488	1.49307	3.55863	0.00156613	0.00116811	UP	99	99	99	26.9928	26.9398	26.9994	245647	43061.1	248026	241630	482801	456899	229922	52133	122904	151950	275701	289352	70145.4	87605.9	155684	131153	306746	352764	515834	587374	624197	619622	642330	187.368	3486.19	2828.62	853903	802390	1.62761e+06	1.59929e+06	2.24777e+06	2.21414e+06	681090	686232	884704	968222	1.11102e+06
M133T19	2.80186	1.48639	3.41136	0.0024561	0.0017243	UP	133	133	133.1	18.702	18.2837	18.7142	5631.13	7686.15	6490.08	3167.35	9696.28	12859.4	8316.82	8361.62	12448.1	12426.6	5339.23	3373.01	7201.08	7643.38	12337	10620.4	9091.28	5771.86	11381.3	9365.24	19973.5	17763.4	17624	0	13255.9	14477.8	17137.5	14199.4	29514.3	23739.4	27821.7	23277.3	30135.7	27842.3	67224.9	70848.2	12967
M72T27	2.79686	1.48381	3.60934	0.00138027	0.00105735	UP	72.1	72.1	72.1	26.9883	26.9441	26.9983	4744.13	1650.5	4264.47	2791.19	8166.66	7086.01	4086.62	1861.39	2245.51	2524.4	5402.98	3766.67	973.818	1579.99	2741.26	2389.96	5350.17	6512.84	8155.54	10285.4	10409.5	11423.6	11126	154.623	798.76	775.09	12894.2	13584.8	27863.3	27265.7	38299.8	37168.8	11987.3	10483.1	16189.1	16966.1	20533.3
M91T23	2.7513	1.46012	3.17135	0.00446561	0.0028429	UP	91	91	91	23.4197	23.4119	23.4312	248444	370117	301141	266068	320772	306411	466229	536892	679233	622993	473113	433893	515343	402125	440513	412412	237488	298793	297899	336412	660790	701037	1.28861e+06	1075.3	544198	687168	849212	486254	1.12582e+06	654493	2.68914e+06	2.36876e+06	495762	516774	2.32044e+06	4.51158e+06	394555
M83T11	2.72907	1.44841	3.30479	0.00281125	0.00193708	UP	83.1	83	83.1	11.3351	10.967	11.3906	5713.45	4164.43	5968.8	5402.03	19224.6	25356.6	5537.48	4198.41	14011	10822.3	8392.01	6792.24	3998.31	2863.93	6191.77	3107.67	25123.5	22187.6	5357	3246.86	9956.44	6433.24	33361.8	199.626	586.549	359.891	64202.5	62514.5	17148	17407.7	64325.3	61952.4	37566.9	37737.4	10953.2	9742.3	28773.2
M165T23	2.68804	1.42655	3.01265	0.00588935	0.00357544	UP	165.1	165.1	165.1	23.4197	23.4082	23.693	21675	9620.37	6456.12	6215.3	8570.87	9592.31	9068.23	14228	56043.1	16341.5	9164.77	10367.4	11099.8	10236.3	12375	11745.3	6738.93	6334.13	26401.4	12342.8	19462.4	17473	39638.9	0	11884.7	15338.3	18843.1	35342.3	26184.2	25889.2	76978.4	63970.8	12165.5	12838.6	131716	125624	16126.2
M126T17	2.63304	1.39673	4.34823	0.000200009	0.000219298	UP	126.1	126	126.1	17.4151	16.3607	17.4932	76612.5	182530	41214.8	30537	141187	127522	63657.6	212476	168506	171293	49560.3	48018.7	51504.5	55065.9	88428	73465.2	67451.4	54318.1	155737	133787	115494	132869	509640	12098	24836	23892.9	186651	192183	282555	282086	307187	280070	153966	148272	553626	546578	383092
M115T19	2.61654	1.38766	3.79066	0.000938551	0.000770281	UP	115	115	115	18.702	18.0458	18.7099	11442	9404.61	5724.08	5693.72	16792.2	17614.1	10675.4	12511	19060.8	19490.2	8842.13	7772.01	11997.1	9831.91	17330.9	15573.3	10864.5	10660	15804	18194.8	31401.4	24036.4	29280.3	0	26635.2	25315.9	23063.8	24295.7	47722.9	41437.4	43333.6	42068.8	47825.2	51179.1	111467	108674	24360
M94T28	2.58597	1.3707	1.98412	0.0598353	0.0227565	UP	94	94	94	27.9529	27.9455	28.8553	6916.78	9330.91	11028.6	7851.74	7845.27	6766.63	10342.2	10216.7	28925.3	25722.5	10398.8	9858.02	9173.76	8060.21	7209.95	8014.56	7671.85	6119.25	6659.9	11161.6	5802.41	6066.42	14492.7	22263.2	6096.93	5490.12	13027.5	179109	13026.5	9056.76	77896.6	18327.9	24761.5	27034.6	21213.2	24400.5	13235.9
M228T29	2.57011	-1.36183	-5.84153	6.72406e-07	2.8011e-06	DOWN	228.2	228.2	228.2	28.5399	28.5316	28.5471	62505.7	58721	45841.9	40515	32647.7	38268	94242.7	80325.4	62099.6	40544.7	67446	38693	65109.1	48366.7	64236.5	51859.5	63910.9	53763.2	29298	24483.6	35601	32387.6	31670.7	808.651	5263.39	8708.85	38808.3	3018.06	40997.3	4617.21	45713.1	2837.57	37632.6	1953.59	3106.8	2008.62	38588.8
M71T25_1	2.56415	1.35848	2.64482	0.0129127	0.00662749	UP	71.1	71	71.1	25.009	24.9932	25.3175	79594.9	77952	68337.3	51607.9	43638.2	36578.7	99171.5	115948	64723.6	594926	57921.6	43241.9	84138.2	52507.4	109066	66414.2	103669	80173	76232	59547.6	77164.8	75684.2	489096	721.375	418376	465683	56397	44557.2	91571.1	75631.8	982433	440454	63145.6	93311.6	84134.4	380690	117516
M229T29	2.55764	-1.35481	-5.69586	1.10553e-06	4.25403e-06	DOWN	229.2	229.2	229.2	28.5398	28.5316	28.5464	41252.3	38647.1	28083.3	21941.7	21750.8	24877.9	62398.1	51709.9	40790.2	23130	43682.9	22682.2	42283.9	29915.4	35356.2	33692.4	44158.4	34052	17541.7	16367.4	21860.5	21724.8	19011	741.726	4118.97	4498.92	21791.1	3416.2	26113.3	2687.62	28953.1	1998.29	23015.4	2178.62	3408.2	1457.67	27692.1
M83T18	2.55671	1.35429	4.80977	8.55183e-05	0.000108632	UP	83.1	83.1	83.1	18.101	18.0941	18.1125	87200.6	46927.6	54482.7	53039.8	67486.1	67977.8	79198	64273.4	70102.9	87471.9	70513.4	65455.3	76399.5	57244.8	65189.9	52750.1	67121.5	64417.3	80319.5	78151.4	38408.9	41497.1	179044	6311.92	89503.9	99981.3	213983	206376	105039	104212	180522	165498	388412	412005	149855	125476	253043
M41T11	2.55015	1.35058	4.73566	7.63146e-05	9.94078e-05	UP	41	41	41	11.3719	11.2936	11.7006	27384.8	22169.4	33846.6	30410.2	73143.6	47366.6	27204.5	25347.7	40525.9	35601	30823.8	34655.2	25132.4	18875.2	33893.4	22714.7	67701.2	65061.6	23590.3	21248.5	32238.5	30353.5	100572	7063.48	93609.4	121650	193667	204709	52442.7	62577.6	152677	148257	108535	99372.8	37623.4	47994.2	79797.7
M57T27	2.54324	1.34667	4.19555	0.000235684	0.000248622	UP	57.1	57.1	57.1	26.9925	26.9441	27.1177	24514.9	13507	31364.5	31695.6	36051.6	124048	28327.9	15034.6	13211.5	81526.6	28989.6	28209.4	19223.6	13229.3	38252.5	12065.7	37698.9	31548.5	58160.3	63128.3	61762.3	60393.9	67953	1551.95	11127.4	58052.7	90968.6	71758.1	154457	157500	209801	197117	70343.7	58353.3	126636	75712.4	100868
M103T26	2.53599	-1.34255	-8.62982	2.16919e-10	2.30995e-09	DOWN	103.1	103	103.1	26.036	25.9813	26.0438	1.03079e+06	1.23672e+06	1.0706e+06	1.15177e+06	991926	951115	608391	1.13564e+06	819769	1.14961e+06	1.10424e+06	1.06725e+06	1.29108e+06	1.4139e+06	1.2533e+06	1.25683e+06	1.01343e+06	997288	1.24789e+06	1.53758e+06	1.35884e+06	1.42974e+06	396368	1308.86	300467	285625	519192	664581	145389	402314	219211	264423	400615	448561	740349	824524	261235
M149T31	2.52191	1.33451	3.68662	0.000698285	0.000600014	UP	149	149	149	31.0535	31.0344	31.1126	24774.6	32967.7	47042.7	40088.3	35797.4	37188.2	32195.1	20565.1	55074.6	56305.1	22761.8	38015.4	80859.3	47251	158909	246581	30452.6	59288.2	97150.3	640988	45802.5	41226.6	346305	261.85	267420	309291	215287	226175	161828	148749	187417	194436	217344	211642	194793	254477	297261
M152T20	2.48897	1.31555	4.42802	0.000171985	0.000194592	UP	152.1	152.1	152.1	19.6435	19.627	20.1314	5926.68	4961.04	4683.75	4467.98	6066.46	7202.53	7158.25	7253.3	7673.3	10260.1	9012.59	6189.3	6473.28	6189.53	8313.57	6969.79	19766.6	4601.21	9788.83	5922.11	6365.44	6222.54	25400.7	154.715	5510.03	3232.71	16712.9	15613.8	20845.2	16037.6	30080.4	35125.5	16606	18416.4	39546.5	37016	21843.8
M41T27	2.48862	1.31535	3.67641	0.00122385	0.000960127	UP	41	41	41	26.9885	26.5773	27.125	49698.2	24696.4	55846.1	60140.3	90230.3	91089.1	59207.2	61331.3	120187	34931.5	68162.7	62650.6	37055.3	32611.7	45801.4	30601.6	53191.5	75514.1	94841	105402	122135	114927	105769	2602.19	20180.5	81461.9	185419	145769	344780	245784	472597	454008	145549	136792	184024	221563	192869
M77T21	2.47771	1.30901	5.83309	4.73131e-06	1.44261e-05	UP	77	77	77	20.7502	20.7332	21.442	23242.9	16586.1	20061.9	18291.9	29562.5	31525.4	30907.1	39196	28610	26756	20952.8	17194.6	17383.5	14000	14199.7	12360.3	16254.5	15559.9	27756.7	29858.1	20303.6	35026.1	54809.2	15227.6	26847.3	30648.5	67442.9	50592.5	81303.3	65708.6	46119.5	44597.7	55341.5	52736.1	74421.9	62752	22815.5
M51T21	2.47512	1.3075	7.29813	9.07656e-08	4.25284e-07	UP	51	51	51	20.7541	20.5814	21.2913	9010.23	6716.93	5721.22	5691.73	12845.4	12537.5	7573.38	4567.91	9408.55	10124.2	9891.58	10033.7	6671.66	6267.52	6856.37	6811.51	5557.35	6940.6	13548.9	12535.6	6953.2	9080.67	18676.5	0	22544.9	19990	23091	22895.8	26440.3	26222.9	18552.6	17221	17871.9	17886.5	25574.1	21247.8	14989.7
M148T26	2.46638	-1.3024	-12.0577	1.84297e-14	4.31764e-12	DOWN	148.1	148.1	148.1	25.8716	25.8583	25.8775	13461	14425.7	13035.7	13102.3	14300.2	13123.8	12393.5	18303.8	9321.32	13956	15588.4	14804.1	12236.9	14478.8	16739.1	12377.9	12010.4	15506.2	13337.1	15027	13927.6	12887.8	11432.7	0	2829.39	3335.44	8957.12	9986.75	6753.41	6222.68	5299.54	5197.08	1958.18	2530.31	7183.38	6468.13	4550.31
M193T17_1	2.45819	1.29759	3.4561	0.00211371	0.00151658	UP	193.1	193	193.2	17.3945	17.3489	17.4547	73094.8	77199.4	40039.7	54605	152051	141461	83292.7	19691.6	187165	185395	62118.3	55510.5	76644.3	66273.2	111538	88762.1	88171	88224.5	133885	106999	98633.6	127707	424647	258.366	29942.2	31507.2	239414	178777	193114	205394	183749	150351	110487	123984	678243	608195	225414
M84T18	2.45167	1.29376	4.70885	0.000108143	0.000131954	UP	84.1	84.1	84.1	18.101	17.6327	18.1127	102763	74886.3	63054.1	70113	81682.3	80160.4	114248	89675	99270.8	103858	77452.9	82067.3	80252.1	82834.5	77060.6	59728.5	74734.9	75209.9	97506.7	99969.5	50265.9	50948.8	205541	2562.74	116987	132210	260089	239660	131187	125082	213294	201113	467140	484076	174554	166697	299159
M88T7	2.44793	-1.29156	-5.09772	2.47061e-05	5.05819e-05	DOWN	88.1	88	88.1	7.15907	7.14362	7.4633	213776	186931	391912	375870	118961	122061	183252	168895	101939	77773.9	314623	310581	253109	280207	142838	131549	165519	173586	87691.7	89014.3	106764	100185	68953.9	45.4063	125457	113625	50125.3	88098.5	92615.1	89247.5	105570	85647.5	55240.9	130194	41680.7	47160.8	73666.4
M53T26	2.41077	-1.26949	-7.46307	3.47788e-09	2.08919e-08	DOWN	53.1	53	53.1	26.0398	26.0282	26.0445	164234	187730	146693	184659	136109	115848	173360	131676	133654	144695	155390	165069	202133	235708	140761	197735	96657	109565	202271	248695	208259	211927	57472	0	61289.6	34526.8	72596.8	104595	105088	49368.6	112939	49169.2	46223.6	94381.5	64836.6	52369.8	38475.6
M151T37_1	2.40172	1.26407	3.95845	0.000511155	0.000458654	UP	151	151	151	37.4309	37.1263	37.4426	9489.46	3239.22	5125.02	12258.4	19831	27054.6	13362.8	5491.9	20507.9	27123.7	12458	16452.7	11860	11172.4	8691.67	13305.5	8345.4	7404.04	7754.59	6280.07	18521.4	29891.4	38868.8	417.504	21549	30786.2	18203.7	16649.1	20465.1	19648	17906.7	26899.3	43573.8	68204.7	52157.8	76923.2	13699.3
M126T26	2.39329	1.259	5.34283	1.30642e-05	3.273e-05	UP	126.1	126.1	126.1	26.2527	26.244	26.2585	24574	15522.4	18755.7	14227.9	42577.5	45373.6	20722.2	15044.9	35218.3	34904.5	17471.9	23926.3	15534.8	19453	19453	16129	25879.4	21127.6	38944.9	48841.9	22486.1	27209.3	89527.7	0	11499.5	15100	66867.9	63086.1	45175.2	41318.3	69771.2	70331	42659.5	48803.5	82326.6	65558.8	107589
M76T26	2.38317	-1.25288	-8.54539	1.95484e-10	2.15133e-09	DOWN	76.1	76.1	76.1	26.0361	26.0321	26.0436	203025	241877	192865	213846	181600	155977	160106	201682	162361	210922	214606	202945	252279	277315	238461	220371	134858	186763	261856	272502	257838	257743	84840.2	0	87092.4	92056.6	134878	144212	70780.6	67857.9	56358	59857.9	55675.7	63834.9	96839.7	145157	37130
M74T32	2.383	-1.25278	-5.33194	3.92826e-06	1.23909e-05	DOWN	74	74	74	31.9327	31.9116	32.3537	168127	133796	113945	120696	84593	97745.7	249993	213784	150014	109097	185285	73838.3	134464	118531	67161.8	157913	171646	144394	62434.4	49276.8	93656	109984	78707	13951.7	24038.5	23468.6	99145.6	10757.5	96255.6	18209.3	106706	12160.1	109396	14691.3	19519.4	12851.9	110736
M60T29_2	2.37985	-1.25087	-5.64254	1.32045e-06	4.89568e-06	DOWN	60	60	60	28.5361	28.5272	28.5432	68824.9	61083.2	46059.6	40850.6	35070.2	39919.3	102605	86815.7	63803	45114	72794	42363.9	68860.4	54429.8	64759.8	50410.8	68541.4	55837.4	29294.6	27179.2	38483.6	32233.9	34536.2	1325.08	7154.29	7621.54	39298.7	7357.98	46203.6	6739.77	47654.7	7944.64	38678.9	7110.5	7066.57	3659.22	40158.6
M143T32	2.34643	-1.23046	-5.24025	4.90324e-06	1.48481e-05	DOWN	143.1	143.1	143.1	31.9333	31.9277	31.9412	26764.2	19713.6	17442.5	16641.8	15479.5	17712.1	39522.9	25815.7	20031.7	17575.2	25225.4	11713.4	21032.6	19388.8	12424.6	27269.7	28199.5	21065.8	8561.77	7094.48	14027.5	17665.9	14278.6	2875.87	2865.66	4251.66	10477	1112.24	12412.1	2205.96	18808.2	2799.51	18701	2315.38	3109.75	2011.61	17560.1
M102T26	2.33078	-1.22081	-9.5875	5.11302e-12	8.84168e-11	DOWN	102.1	102.1	102.1	25.872	25.8602	26.0445	331365	412093	314318	287245	311063	327173	167329	223405	240082	347081	264201	344176	255927	319629	403141	355027	276851	317400	301907	339749	319914	316680	280619	0	72518.5	52233.7	132773	235888	201473	168355	92988	123172	61057.6	68920.5	155774	163550	95337.6
M55T7	2.32114	-1.21484	-5.16484	2.13629e-05	4.61604e-05	DOWN	55.1	55	55.1	7.15361	7.13558	7.17555	4.31308e+06	3.93992e+06	7.72913e+06	7.44324e+06	2.64478e+06	2.71206e+06	2.89801e+06	3.11848e+06	1.93914e+06	1.84449e+06	5.93017e+06	6.49751e+06	5.55623e+06	5.6246e+06	3.03632e+06	2.80983e+06	3.79139e+06	3.54208e+06	1.78645e+06	1.79923e+06	2.40353e+06	2.31558e+06	1.66173e+06	744.85	2.61879e+06	2.37348e+06	1.34564e+06	1.90059e+06	1.50972e+06	1.70566e+06	1.78563e+06	1.8474e+06	2.87624e+06	2.42803e+06	701154	954135	1.72354e+06
M155T23	2.30342	1.20378	2.51056	0.0183076	0.00890384	UP	155.1	155.1	155.1	22.6863	22.4454	22.709	8630.9	10227.4	6900.88	3039.64	4556.57	3288.57	11792.9	13255.1	7664.64	41043.8	5933.53	4641.84	7777.72	5179.94	17613.9	6424.98	10411.6	9852.91	6992.26	28450.9	5600.14	4351.45	2076.22	0	64034.7	82173.7	6289.61	12002.6	44410.3	51514	13286.4	10237.1	9110.67	16416.2	65951.9	7525.78	15096
M127T17	2.25741	1.17467	4.07346	0.000335948	0.000323983	UP	127.1	127	127.1	17.3149	17.0147	17.4926	26088.6	4646.14	7863.52	16739.7	11485.9	10257.1	33544	10793.4	21311.1	26467.3	17413	11776	5393.19	5287.67	17690.1	5315.21	24090.8	6356.95	18508	12526.2	8900.81	9684.78	54092.2	550.978	626.308	37179.7	8134.88	13103.4	26576.8	20685	51177.9	58513.9	25179.9	23853.5	64063.7	63935.6	31853.1
M171T26	2.25408	-1.17254	-11.4911	1.4122e-13	1.59577e-11	DOWN	171.1	171.1	171.1	25.8684	25.8622	25.8775	76584.7	96819.6	74673.9	69517.2	82112.6	77911.3	66621.9	94675.1	60735.2	83612	89786.1	90792.7	69627.5	81469.2	96543.6	84791.4	71714.2	82555.2	69936.4	78941.8	79479.6	76755.5	66234.6	0	21210.4	23326.9	58154.1	56018	46525.4	42341.3	33027.2	36665.6	17223.3	16994.1	41341.9	46058.6	22940
M86T7	2.24484	-1.16662	-5.00625	3.93103e-05	6.78761e-05	DOWN	86.1	86.1	86.1	7.15432	7.14355	7.43202	53340.6	48924.5	105555	98906.7	32009.9	34561.7	57512.8	46021.2	31323.2	25167.3	78258.5	86266.9	74325.4	75000.6	42679.2	34355.1	44731.4	43974.8	22284.5	22347.2	24276	28709.1	19256	0	32229.4	29151.6	24617.2	24951.2	26412.1	23400.6	25699.1	23815.1	31463.7	30601.1	15223.8	13453.1	20398.6
M99T26	2.23392	1.15958	3.25077	0.00303959	0.00207036	UP	99	99	99	25.5667	25.5578	25.8753	163432	29835.8	115844	105602	167882	149999	165357	33109.3	58340.6	69835.7	102611	106616	37309.2	47851.8	86332.4	75517.3	143195	161192	149816	182637	342068	347493	146339	42.1787	6033.08	8934.99	714114	670594	385376	371250	562961	547346	346726	349402	292951	315032	252894
M173T18	2.22378	-1.15301	-2.0439	0.0472807	0.0191649	DOWN	173	173	173	18.2313	18.2185	18.2443	9747.02	197.879	28320.1	26089.4	60549.2	60769.7	12465.5	193.538	44645.1	43168.7	39026.4	36579.3	544.186	938.934	237.57	156.39	1466.8	2364.62	12636.6	13360.4	53210.6	54526.6	0	0	0	0	35011.3	32542.9	0	0	0	0	67768.7	68241.4	0	0	0
M50T24	2.19537	-1.13447	-3.96393	0.000308307	0.000303483	DOWN	50	50	50	24.0561	24.0485	24.0679	34352.5	28777.1	63929.7	65026.4	20017	15923	36734.6	30628.6	16392.5	18739.1	56787.1	53683.4	48687.5	39611.5	22166	21700.2	21433.4	23106.6	15223.9	17136.9	19933.1	19413.2	9748.13	0	12728.2	16087.2	13737.4	11929	11266.5	9437.32	12859.8	11400.5	16207.3	16997.1	6816.1	8624.05	6307.56
M43T24	2.1827	-1.12611	-4.33646	9.56672e-05	0.000118585	DOWN	43	43	43	24.0562	23.5525	24.0757	951393	860564	1.78613e+06	1.74552e+06	581717	569943	1.02302e+06	971775	545745	550229	1.60042e+06	1.47535e+06	1.42334e+06	1.36113e+06	796574	715214	676387	671169	502481	508589	626993	618482	247111	5712.69	331264	348082	500177	481637	336287	339588	357696	369514	512166	537129	279362	286977	196389
M130T26	2.17907	-1.12371	-11.8464	4.10783e-13	2.17267e-11	DOWN	130.1	130.1	130.1	25.869	25.8622	25.8775	154208	189660	155736	143997	154900	149693	143237	183717	133555	160780	175342	173189	138920	156959	188216	172188	145296	160612	149461	158849	155007	150620	131676	0	48738	47954.6	120487	113942	90372.6	95090.3	72302.1	73149.6	32498.7	34773.1	85661.7	85227.2	54777
M63T24	2.16975	-1.11753	-4.05512	0.000235596	0.000248552	DOWN	63	63	63	24.0598	24.0522	24.6308	54735.7	49323.4	103329	107880	30043.1	29765.5	61684.2	59554.7	25328.2	31527.3	88224.3	57566	85939	82006.9	42929	37656.1	34699.1	35442.5	28011.5	23555.4	34132.4	35125.8	8847.66	0	15634.4	19467.3	31511.9	33294.1	18488.9	15797.1	21809.6	20385.1	33310.8	28534	15758.7	12397	11068.2
M136T29	2.162	-1.11237	-2.61372	0.0136902	0.00695715	DOWN	136.1	136.1	136.1	28.6028	28.5952	28.6095	38432.4	13979.1	51195.7	55062.1	6948.51	7259.19	17053	11250.6	1413.53	3365.55	42302.7	52307.8	15271.2	17068	6194.22	5345.28	25679.7	25933.6	22409.7	19015.5	1882.32	2871.84	6654.8	506.553	6714.18	7658.65	8512.74	9783.87	5449.2	5519.33	8532.14	6687.27	11898.2	12802.6	5684.45	3228.78	6256.73
M76T17	2.15587	1.10827	3.15785	0.00423103	0.00271887	UP	76	76	76	17.1504	17.1424	17.1673	7412.33	5839.25	3603.57	3293.65	9037.66	11860.2	7951.73	8534.96	11880.3	9232.89	6953.97	4828.98	9131.5	9007.83	13332.9	10210.7	4669.79	5064.42	7429.32	8135.75	14751.9	20198.7	39549	0	6205.77	5277.55	15887.2	13788.8	17492.8	15046.8	45978.7	43786.5	6591.53	6605.21	38391.2	35942.2	12943.7
M54T7	2.15372	-1.10683	-4.76238	6.10551e-05	8.61475e-05	DOWN	54.1	54.1	54.1	7.15432	6.57517	7.16793	96796.1	95524.5	190975	188464	61285.7	67923.1	93553.9	68105.6	45985.2	55734.4	157843	157081	149082	133702	78459.7	64831.7	91612.4	90496.2	47310.3	47010.3	50796.2	49928.3	38371.3	0	62195.6	62488.4	41044.4	47179.5	48667.3	45875.8	49052	51651.5	66417.7	67330.8	11229.5	18298.2	43260.5
M40T7_1	2.14299	-1.09962	-4.91384	3.77313e-05	6.62257e-05	DOWN	40.1	40.1	40.1	7.15299	7.14062	7.16402	96739.4	88554.5	177118	162872	57877.9	58296.1	78839.5	79026.7	45528	44337.3	142835	138912	125444	118815	69296.3	73999.5	86019.2	94058.8	36295.3	42040.4	50457.5	45859.1	35632	245.507	65436.4	61729.8	59372.6	37829	31401.7	44406.5	40055.3	46712.6	59004.4	60939.4	20773.2	13497.1	33826.1
M88T12	2.14162	1.0987	2.71113	0.0128346	0.00659528	UP	88	88	88	12.4749	12.3985	12.524	102879	76101.9	103148	97761.3	69171.2	97368.9	157734	133659	124459	108720	125597	83303.8	104946	71562.8	110775	75539.2	117138	79041.8	132944	112339	149389	174855	121017	0	206456	278544	161848	94438.6	139169	120829	298572	268667	243537	223782	867278	778779	119950
M51T17	2.1414	1.09855	3.20188	0.00263229	0.00183072	UP	51	51	51	17.4056	16.9694	17.4508	31746.7	226715	2092.49	14662.9	64809.5	57467.2	33899.8	273581	86927	87018.1	28796	23948.8	24568.2	21819.4	36511.1	28855.6	30045.2	25487.6	63046.6	62622.2	47618.8	47303.6	242565	8925.48	29020.9	33825.3	95471.6	89219.5	140601	117348	137786	125987	78844.8	77969	260816	261314	165196
M107T43	2.13993	-1.09756	-3.94013	0.000483208	0.00043768	DOWN	107	107	107	43.2377	43.2107	43.2456	53689.4	63447.2	41159	46489.3	36767.2	30890.4	95663.5	106177	88810.7	26877.7	94957.5	51110.6	83461.6	28471	19935.1	44653.2	37821.4	14618.3	10265	6488.28	72589.7	51182.3	28322.6	655.806	15018.6	13069.6	54481.3	34858.5	15599.3	29934.3	16249.2	27106.5	18491.9	26560	17739.9	21693.4	11926.6
M100T26	2.12571	-1.08794	-11.575	4.76064e-13	2.23061e-11	DOWN	100	100	100	25.8686	25.8607	25.8794	79144.7	97749.8	80305.4	75229.4	81797.7	75059.4	75177.1	96794.1	70585.5	82849.6	91935.8	85007.3	70793.2	81093.9	97770.2	88192.6	73743.2	76728.7	77348.2	81352.3	74166	77459.3	63846.8	0	23405.6	26933.7	60376.4	58852.2	47006.7	45546.7	37469.7	38030	18501.4	17963.9	47219.6	47436.5	29763
M113T12	2.12442	1.08707	2.53789	0.0186904	0.00906136	UP	113.1	113.1	113.1	12.477	12.3985	12.524	38792.9	29204.8	23055.6	32155.5	40042.4	35810.7	34298.1	41801.2	39107.7	31181.5	29565.6	36832.9	33139.5	26772.7	49661.1	31161	44799	19902.1	49839.1	42567.7	72988	70340.4	41127.8	0	94903.8	91113.2	25738.9	47014.8	36050.8	38253.2	114469	102673	86021.9	86385.1	320709	276373	37920.2
M89T26_2	2.12417	-1.0869	-9.02158	9.7339e-11	1.265e-09	DOWN	89.1	89.1	89.1	26.036	26.0243	26.0405	1.34516e+06	1.56134e+06	1.36987e+06	1.46855e+06	1.21463e+06	1.20201e+06	1.23488e+06	1.46077e+06	1.16889e+06	1.39888e+06	1.51282e+06	1.4776e+06	1.70446e+06	1.84391e+06	1.56109e+06	1.50438e+06	1.13082e+06	1.29374e+06	1.67222e+06	1.92703e+06	1.63756e+06	1.68576e+06	580897	1358.63	626239	663083	838711	1.01904e+06	514804	525744	483295	489118	688733	667481	956599	971416	510278
M89T29	2.12362	1.08652	3.12116	0.00434108	0.00277704	UP	89.1	89	89.1	28.7602	28.4328	28.7815	19162.5	30875.8	10452.6	12123.4	6713.83	12901	11403.6	46310.1	32483.8	7426.67	8733.4	20516.3	22953.8	7994.83	23365.1	26310.1	18752.8	4957.6	26823.4	13856.8	24037	11146.9	44193.8	404.35	102425	91969.1	27039	19755.4	35053.1	27580.9	41883.3	22381.8	29804.8	24489	33975.8	34569.8	20497.3
M155T22	2.1175	-1.08236	-3.65495	0.000721493	0.000616892	DOWN	155.1	155.1	155.1	22.1207	21.9904	22.146	37673	19010	24406.9	21266.7	9356.61	7474.39	41450.7	28381.6	39100.2	36791.3	24534.6	25089.7	16731	15691.7	17265.8	16518.6	22523	19041.7	24890.1	23460.5	1902.84	1170.89	1325.53	74.4527	2822.54	15601.4	2569.54	1887.36	14016.6	13582.2	25567.2	27846	28376.5	20784.3	1937.55	1803.43	1781.54
M65T24	2.11607	-1.08138	-3.90393	0.000383337	0.000359465	DOWN	65	65	65	24.06	23.9354	24.0679	147464	121601	274400	279217	77189.6	77222.3	179484	165000	85534.2	68956.9	279625	168535	227930	225866	127100	100403	100759	103242	80395.1	68528.9	76073.1	68639.9	30974.3	229.501	51592.7	59672.5	79443.9	59713.8	48981.9	48753.9	36818.8	43062.7	84430.2	76070.7	46499	41810.4	97284.8
M70T26	2.11342	-1.07958	-11.8737	4.04121e-13	2.16591e-11	DOWN	70.1	70.1	70.1	25.8686	25.5554	25.8775	954632	1.16297e+06	962560	908554	990476	927283	921665	1.1606e+06	856056	996625	1.09668e+06	1.0915e+06	864358	971710	1.18096e+06	1.04332e+06	904937	999735	940682	971592	959214	939281	800911	471.057	318371	330002	743547	712049	581122	582157	470124	454991	224775	235716	548170	560618	368351
M166T24	2.11192	1.07855	2.44304	0.0222937	0.0105229	UP	166.1	166	166.1	23.6853	23.4268	24.9263	20915.5	14158.7	5474.58	4417.36	36886.2	34633.9	9797.34	19920.1	50921.8	14786.1	13476.8	8180.26	21223.3	22715.5	32117.5	25616.3	12123	13225.3	24494.1	24115	37041.1	37330.1	78579.3	0	9731.18	222.349	31566	30597.3	40214.5	37848.8	74291	72138.7	10876.9	11993.1	68917.2	68699.6	35674.5
M104T24	2.11172	-1.07842	-3.29565	0.00225305	0.00160221	DOWN	104	104	104.1	24.06	24.0519	24.0756	966113	1.45413e+06	4.03664e+06	4.61982e+06	1.35156e+06	552944	3.01094e+06	2.80858e+06	1.42389e+06	1.31154e+06	4.77734e+06	1.70532e+06	3.60937e+06	2.33021e+06	1.61459e+06	1.8817e+06	1.36204e+06	1.02276e+06	1.07055e+06	719139	1.2317e+06	902863	617329	205.893	632414	861249	1.38319e+06	1.02277e+06	736296	719831	906538	794579	1.17492e+06	1.32547e+06	524242	618549	351980
M109T25	2.11085	1.07783	4.28974	0.000204348	0.000222987	UP	109.1	109	109.1	24.9816	24.6028	25.304	29072.6	7058.32	16274.9	18464.6	32463.8	30982.4	17886.6	11981.9	20627.8	12181.8	25099.2	16708.7	45154.5	42302	24953.3	19438.6	23874.3	20543.6	22317.7	21581.5	11716.2	13024.5	40118.9	1091.27	43955.4	47219.2	27230.5	32928.6	30035.2	50648.7	51244.1	53829.4	69285.5	69298.9	51972.7	54683.1	47010.7
M175T24	2.10729	1.07539	3.35671	0.0024176	0.00170139	UP	175.1	175	175.1	24.1438	23.8708	24.6179	6647.08	5444.31	16341.3	14339.9	16617.7	3762.56	6355.66	8388.96	4307.3	5428.53	12040.9	8961.96	10909.2	12832.8	4831.39	5663.58	14447.4	14027.1	10032.3	7408.77	3251.57	1501.36	24453.7	0	13392.5	14509.6	22217.2	20550.2	6017.22	6956.98	16543.5	13730.5	51240.8	51137	15365.6	12460.4	25689.7
M101T26	2.10715	-1.07529	-11.5514	7.32303e-13	2.44148e-11	DOWN	101	101	101	25.8718	25.8641	25.8794	2.86557e+06	3.52034e+06	2.90906e+06	2.74125e+06	2.97482e+06	2.78365e+06	2.78027e+06	3.51986e+06	2.54531e+06	3.01543e+06	3.29664e+06	3.31373e+06	2.57406e+06	2.93814e+06	3.55975e+06	3.14881e+06	2.70544e+06	2.98422e+06	2.8263e+06	2.92009e+06	2.89892e+06	2.82931e+06	2.46738e+06	477.988	952805	1.00004e+06	2.31762e+06	2.16402e+06	1.76072e+06	1.74314e+06	1.41143e+06	1.35865e+06	696394	694589	1.64166e+06	1.70222e+06	1.08308e+06
M129T26	2.10489	-1.07374	-11.4675	8.55316e-13	2.50475e-11	DOWN	129	129	129	25.8718	25.8641	25.8814	2.36755e+06	2.91751e+06	2.40129e+06	2.26461e+06	2.45996e+06	2.30072e+06	2.29395e+06	2.89936e+06	2.09213e+06	2.49014e+06	2.72963e+06	2.74232e+06	2.1224e+06	2.42753e+06	2.94036e+06	2.60103e+06	2.22564e+06	2.46614e+06	2.32723e+06	2.41587e+06	2.3898e+06	2.3437e+06	2.03779e+06	261.243	780483	824819	1.92108e+06	1.79555e+06	1.45231e+06	1.44603e+06	1.16791e+06	1.1227e+06	566638	575408	1.35976e+06	1.41876e+06	893018
M101T21_2	2.10442	-1.07342	-4.21344	0.000183891	0.000205278	DOWN	101.1	101.1	101.1	21.0141	21.0015	21.0243	1.54606e+07	1.55639e+07	1.30696e+07	1.14678e+07	2.71876e+07	2.86424e+07	9.44024e+06	1.38881e+07	1.76502e+07	2.49768e+07	1.75942e+07	1.93058e+07	1.54605e+07	1.5638e+07	2.34509e+07	2.1339e+07	1.55121e+07	1.72719e+07	2.32581e+07	2.70318e+07	2.33767e+07	2.3316e+07	2.91106e+07	0	0	0	1.9411e+07	1.90768e+07	1.13685e+07	1.68436e+07	1.72342e+07	1.50411e+07	0	0	1.72248e+07	1.73317e+07	0
M42T18	2.10274	1.07227	3.17111	0.00442043	0.00281908	UP	42	42	42.1	17.6695	17.4298	19.0695	32383.6	33864.8	31384.6	42696.7	37185.5	39275.6	43319.5	43140.1	56882.4	32014.9	29657.7	31651.2	43750.9	45221.4	18509.2	30411.5	44478.8	49368.1	41232.5	61392.5	33576.5	31175.2	42216.5	24029.9	115105	63856.1	72692.5	60990.7	58480.1	56319.9	132533	71017.2	49498.3	44801.1	266983	245578	39289.7
M62T7	2.10122	-1.07123	-5.07458	2.61368e-05	5.23353e-05	DOWN	62.1	62.1	62.1	7.15455	7.14045	7.17153	36289.7	30984.8	62284.6	60313.6	22898.1	21490.6	37642.1	32474.6	17272.5	18781.4	55397.3	52780.3	49558.3	46849.9	27856.6	24674.5	31869	30949.3	15363.6	15530	18990.7	18626.4	13237.9	0	21903.7	21716.4	18034.2	16468.9	17906.8	15695.7	18044.3	17192.9	23948.5	22437.1	8853.61	7974.6	12613.4
M122T26	2.09289	-1.0655	-8.88656	8.57865e-11	1.13912e-09	DOWN	122.1	122.1	122.1	26.0359	26.0242	26.0436	1.18774e+07	1.36136e+07	1.21008e+07	1.32464e+07	1.03485e+07	1.05405e+07	9.62111e+06	1.28204e+07	1.0291e+07	1.27703e+07	1.17888e+07	1.28777e+07	1.47553e+07	1.651e+07	1.35026e+07	1.3611e+07	1.04927e+07	1.10887e+07	1.52347e+07	1.68734e+07	1.44226e+07	1.51527e+07	5.59243e+06	6554.1	5.72759e+06	5.15761e+06	7.37201e+06	8.43881e+06	4.74378e+06	5.5405e+06	4.74881e+06	5.38454e+06	6.1315e+06	5.85244e+06	7.68374e+06	8.63851e+06	3.94627e+06
M114T26	2.08073	-1.05709	-9.67077	4.78861e-12	8.54739e-11	DOWN	114	114	114	25.8761	25.5571	25.8851	27116.1	32281.4	23227.5	24981.3	25303.1	16758.3	22779.5	32774.2	23856.5	25218.3	30261.7	32785.7	21377.2	26590.7	33662.9	27043.2	22919	23108.6	25125.2	25140.9	27394.3	27017.7	22178	0	8287.7	9231.51	20219.1	19199.9	14995.9	16090.6	12189	12301	3552.52	15133.5	15073.2	14773.8	9276.86
M71T26	2.07988	-1.0565	-11.6614	6.91891e-13	2.41669e-11	DOWN	71.1	71.1	71.1	25.8681	25.8607	25.8775	1.0554e+06	1.28572e+06	1.06902e+06	994342	1.11172e+06	1.03339e+06	1.03353e+06	1.29099e+06	945006	1.1081e+06	1.20417e+06	1.21006e+06	960772	1.07784e+06	1.31028e+06	1.15089e+06	1.00539e+06	1.10654e+06	1.04571e+06	1.07555e+06	1.05879e+06	1.04094e+06	897670	893.647	351030	367977	833590	784410	657652	646274	527909	516107	267195	270189	632697	635855	412963
M87T7	2.07893	-1.05584	-4.77814	6.0506e-05	8.57686e-05	DOWN	87	87	87	7.15692	7.14418	7.174	1.45999e+06	1.2896e+06	2.58926e+06	2.46889e+06	917255	810238	1.52057e+06	1.32553e+06	635521	615428	2.25772e+06	2.13866e+06	2.00581e+06	1.84223e+06	1.06916e+06	977104	1.2519e+06	1.22152e+06	617262	614976	768237	718888	475354	454.652	867623	859634	722179	640658	716394	634121	736957	692548	993385	923753	381058	353649	582147
M105T24	2.07817	-1.05531	-4.02721	0.000246868	0.000257363	DOWN	105.1	105.1	105.1	24.0562	24.0483	24.146	334609	305117	646016	633635	204841	196605	354036	337839	179704	191521	561529	531276	501576	492581	271260	244206	246923	239139	177545	181917	210493	216352	110138	272.952	122477	140299	198584	180558	122451	120424	126538	128301	238068	183075	98099.2	89613.3	94731.7
M73T26	2.07813	-1.05528	-10.9567	2.05258e-12	5.03e-11	DOWN	73	73	73	25.8686	25.8622	26.0397	223817	287547	246646	226674	251024	208331	235190	292571	218803	245386	273073	281096	217474	248206	289829	256050	220495	243418	224647	228540	226454	226812	196508	910.929	88723.2	79795.8	198825	180840	153125	127109	123039	103235	50384.2	51375.4	139812	137096	81334
M128T26	2.07786	-1.0551	-10.1251	4.30544e-12	8.07216e-11	DOWN	128	128	128	25.8688	25.8602	25.8775	81259.8	125448	106996	111336	125444	115440	114121	143182	101609	115919	135442	136393	104948	105873	142729	126889	105336	121399	114131	116413	118006	94153.9	101640	0	30647.1	42208.5	91370.5	77114.3	72248.4	73470.9	56586.8	57644.8	25367.8	28438.4	68676.8	67568.6	40088.2
M87T26	2.0743	-1.05263	-6.06752	3.18308e-07	1.42203e-06	DOWN	87.1	87	87.1	26.0322	25.5614	26.0445	58274.2	82107.5	77138.6	67293.9	46217.4	42396.3	40523.1	58229.7	56939.4	89130.1	82965.6	84534.6	101103	108788	84315.4	81699.1	63998.8	74335.7	110003	112942	97975.8	98003	39083.5	321.385	13416	37289.2	79264.6	55623.6	38613.8	45341.2	54042.2	12443.5	38104.6	27533.7	34113.3	50632.1	39010.4
M158T28	2.07075	1.05015	3.60558	0.00143498	0.00109029	UP	158.1	158.1	158.1	27.9958	27.9887	28.0121	8834.18	8287.62	2321.67	4536.67	10797.8	10541.3	7215.68	9883.03	11434.9	11518.4	8511.13	5697.68	6013.73	6844.2	7761.66	6537.32	6671.06	7265.37	10289.7	7782.88	3875.03	3492.09	27288	0	335.971	397.847	14365.5	13457	19495.6	23171.5	31330.9	30544	15314.1	14214.1	27731	30103.4	18732.4
M69T7	2.06291	-1.04468	-4.84123	5.03167e-05	7.80423e-05	DOWN	69.1	69.1	69.1	7.15551	6.58392	7.174	743998	672889	1.31402e+06	1.25986e+06	493800	437965	765029	675386	312660	318038	1.1331e+06	1.08611e+06	1.0338e+06	963674	554074	493428	651689	634425	324718	312785	400922	397742	265594	484.145	466721	462782	363978	349094	343068	328313	361409	367480	487217	471266	195039	180812	310424
M122T24	2.06202	1.04406	3.78749	0.000838364	0.000700439	UP	122.1	122.1	122.1	24.1421	24.1343	24.1563	8839.8	7246.81	16182.6	13291.8	7960.53	6367.96	6558.38	9548.11	6466.69	6901.63	14224	9320.06	12162.9	10585.6	5032.03	5222.84	12733.3	12127.3	9407.55	9816.13	3139.44	2525.97	22386	0	13446.6	17218.9	20029.7	18631.9	7420.7	8222.29	15734.4	15618.6	46477.9	47209.8	15974.2	15196.6	24302
M72T26	2.05384	-1.03832	-10.9588	3.29048e-12	6.89946e-11	DOWN	72.1	72.1	72.1	25.8679	25.8602	25.8775	64105.2	80180.7	59372.6	61977	66599.3	64612.1	63709.7	78530.9	58608.6	68204.4	74722.3	75617.8	57137.3	67289.7	78459.9	70040.9	61871.8	63544.6	64201.4	66827.4	63443.1	63904.9	55747.3	181.089	22225.7	20565.2	51175.8	50408.9	38050.1	40581.9	33746.4	34381.5	14755.5	16597.9	39806.2	40272.2	23899.9
M78T26	2.03449	-1.02467	-8.61269	3.16134e-10	3.04904e-09	DOWN	78.1	78	78.1	26.0358	25.5197	26.0405	1.43619e+06	1.58916e+06	1.47632e+06	1.60446e+06	1.26396e+06	1.29756e+06	1.27587e+06	1.68117e+06	1.25426e+06	1.40363e+06	1.55621e+06	1.5798e+06	1.74384e+06	1.97419e+06	1.64428e+06	1.56934e+06	1.22522e+06	1.35864e+06	1.81618e+06	2.01017e+06	1.74998e+06	1.80865e+06	670891	381.765	758123	712768	1.00352e+06	1.05963e+06	125294	667864	647421	697038	788981	740700	884231	1.13448e+06	554066
M87T32	2.03194	-1.02286	-4.856	2.22179e-05	4.73371e-05	DOWN	87	87	87	31.9354	31.9116	31.9389	121002	92023.9	85268.5	92155.8	50890.8	68427.4	185574	169095	113365	70020.2	140754	57109	106775	89908.8	50754.1	113157	120899	105150	55686.2	40641	60277.6	80624.7	61871.2	10744	19336.1	27138.1	79924.9	21924.7	73171.8	31133.7	73258.5	31280.5	77582.9	16059.4	27703.6	18803.5	73240
M41T18	2.02472	1.01772	5.01619	4.09412e-05	6.95254e-05	UP	41	41	41	18.1049	18.0904	18.4302	108278	83903.8	73956.5	81504.4	123736	90914.2	156625	124823	137928	126841	103699	89556.9	144100	102572	78174.3	68527.8	102207	89680.6	120847	105553	134184	72856.1	203071	15219	165964	183782	297184	231146	179699	204502	252571	229784	489711	142132	194669	205881	311643
M55T26	2.01866	-1.0134	-10.5025	5.46962e-12	9.14469e-11	DOWN	55	55	55	25.8681	25.861	25.8775	626650	838836	750114	672138	747515	684854	738115	917949	676258	737170	853310	647648	676619	626001	772012	723682	707844	714304	614117	670270	672533	655802	620859	2089.45	201936	247193	590006	512492	457626	396441	378930	357257	193729	184289	449242	377343	250076
M60T12	2.0186	1.01336	2.79926	0.0105532	0.00563045	UP	60	60	60	12.4721	12.084	12.8291	37287	26080.5	26477.8	27593.6	31745.2	28694.9	40656.3	33607.5	35778.5	31339.2	33878.9	28966.8	24455.2	24640.7	35357.1	25437.3	31982.8	25740.5	34931.8	35503	51468	44425	36389.1	0	67718.8	76083.7	40764.6	35398	46071.9	29301.9	83609.7	68109.6	69343.4	64955.6	227702	204786	40715.4
M61T7	2.00843	-1.00607	-4.87647	4.37012e-05	7.21959e-05	DOWN	61	61	61	7.15551	7.14355	7.4633	1.49912e+06	1.34539e+06	2.60207e+06	2.48362e+06	984924	913861	1.57814e+06	1.37979e+06	683191	671893	2.29377e+06	2.16208e+06	2.06424e+06	1.91036e+06	1.12699e+06	1.02288e+06	1.32339e+06	1.27865e+06	688556	672985	826578	785004	556693	0	941923	942018	777803	704155	766462	693173	790604	739070	1.04098e+06	960490	415401	390157	624868
M156T22	2.003	1.00216	2.43273	0.020595	0.00983941	UP	156.1	156.1	156.1	22.478	22.4454	22.9042	3495.52	7098.87	1360.91	1227.19	12567.1	8834.05	6116.64	5896.07	30086.8	32632.4	3081.32	3947.82	2800.9	3239.74	11449.5	10768.3	4160.75	3422.03	18072.4	22976.3	8006.43	7891.14	26101.3	0	6485.81	6958.7	4062.99	6546.22	45048.9	37871.4	22225	21009.1	14257	10766.1	56237	52244.2	18412.4
M190T24	1.99802	0.998571	3.65089	0.00121228	0.000952747	UP	190.1	190.1	190.1	24.1422	23.8622	24.4903	20178.4	19440	41010.6	37571.4	21321.8	21227.7	14032.1	21489.3	19168.2	12759.4	31166.7	27557.7	31237.5	29048.6	17705.8	14381.2	31885.1	29097.4	23706.6	22819.3	8984.23	9505.4	55422.3	0	33686	41343.2	46831.3	52081.4	22069.1	21076.3	39691.3	38224	117302	117706	41588.7	37952.1	59375.6
M77T26	1.99568	-0.996882	-6.94691	1.96712e-08	1.00185e-07	DOWN	77	77	77.1	26.0321	25.9812	26.5757	1.43533e+06	1.65849e+06	1.46743e+06	1.69265e+06	1.25168e+06	1.2968e+06	962815	1.41826e+06	1.11268e+06	1.7082e+06	1.54147e+06	1.64073e+06	2.036e+06	2.11945e+06	1.629e+06	1.66402e+06	1.26396e+06	1.42784e+06	1.91514e+06	2.43029e+06	2.0591e+06	1.83321e+06	798104	741.548	423796	847928	1.04986e+06	803738	1.08267e+06	709215	930382	928075	943423	966599	692949	970373	777235
M77T22	1.99136	0.993758	2.21884	0.0329428	0.0145136	UP	77.3	77.2	77.3	22.4741	22.4454	22.503	1347.09	1484.65	1044.71	0	25476.5	22026.7	4364.21	4981.56	74359	69561.3	4794.62	7203.01	4965.96	8017.95	22861.2	15372.4	11382.2	10167.9	51476.1	48545.1	21610.9	18483.8	53298.6	0	0	0	4312.51	11810.6	91287	82669.8	49623.2	43950.6	28806.5	27401.1	112795	110868	42469.1
M173T22	1.98695	0.990557	2.82709	0.00783595	0.00447364	UP	173.1	173.1	173.1	22.4781	21.9868	22.7091	7293.32	5541.35	1486.36	2774.62	14345.1	14472.4	7687.32	11759.7	41872.7	40566.9	7816.6	5185.48	6444.79	5823.47	13758.6	12140.9	7297.32	8163.76	27233.4	22171.6	13355.2	14037.7	32954.2	0	38838	40677.5	8101.98	8909.65	51288	43488.6	23982.9	22446.5	17331.7	15923.9	70049.7	63170.1	24880.2
M172T28	1.9867	0.990371	3.48962	0.00190318	0.00138426	UP	172.1	172.1	172.1	27.999	27.9882	28.7773	17158.5	15949.4	8467.3	7359.2	22669.7	20321.6	16138.3	19765.5	25700	28754.2	16717.2	13572.1	13788.7	16149.7	19526.4	11426.5	16176.6	16913.7	21815.9	18918.8	8347.32	9742.74	55488.8	0	3447.82	518.065	29275.7	28305.4	42087.1	45956	65985.8	66931.2	28393.7	32835.2	61374.2	62355.8	43110
M64T26	1.98188	-0.986872	-7.84728	1.61222e-09	1.13295e-08	DOWN	64.1	64.1	64.1	26.0359	26.025	26.0436	412835	445604	438391	461932	356384	353872	337614	395178	327625	399582	439181	444251	492249	570668	463636	468845	301181	384152	525271	580285	498581	530097	206649	75.8577	157467	200729	277849	290315	165068	188530	170368	166211	226615	224722	287256	334256	104469
M61T12	1.98028	0.985705	2.4009	0.0252874	0.0116902	UP	61	61	61	12.476	12.0976	12.7596	23072.5	13784.2	19618.3	19088.2	17456.4	19183.5	22012	17477	20801.1	21274.7	24436.4	18436.5	19122.8	14807.1	24059.8	16941.5	18819.1	6780.91	20791.3	19562.6	35110.8	30310.1	10005.9	0	39194.4	44280.5	27515.7	23999.2	30884.7	13622.2	56015.2	6083.44	41719.9	39943.1	152138	136594	26139.7
M185T29	1.96099	-0.971582	-4.12601	0.000175625	0.000197889	DOWN	185.1	185.1	185.1	28.5402	28.5359	29.0429	14638	13461.9	9591.21	8486.66	8634.47	9572.56	25837.4	22858.3	15397	9870.95	16364	9784.85	13689.8	11695	17240.3	12938.8	10689.1	11559.7	7466.21	4540.8	6399.34	6512.4	5636.09	0	1635.21	754.258	9385.86	1202.78	12151.5	1625.47	12746.2	1663.49	7638.28	10580.4	1203.98	5091.51	9026.52
M43T13	1.9596	0.970556	4.86944	3.18467e-05	5.9607e-05	UP	43	43	43.1	12.7399	11.9531	13.2525	578605	893697	543495	569514	788480	836369	711160	754932	776911	754823	551129	547311	75360	668257	103868	855053	800771	861126	52063.6	1.06824e+06	753429	687081	1.34435e+06	19054.9	2.30683e+06	476504	1.17014e+06	956329	1.41478e+06	1.65663e+06	1.25893e+06	1.28165e+06	1.10752e+06	966009	306407	1.20632e+06	1.72326e+06
M84T26	1.95906	-0.970161	-8.5399	1.63485e-10	1.89375e-09	DOWN	84	84	84	25.8756	25.8716	26.25	18997.2	21560.5	22876.1	21502.3	15344.1	21032.2	20456.8	28560.6	29258.8	21846.1	25598.2	22034.1	19263.1	17706.4	24333.6	24304.7	16445.5	22666.5	22006.6	17833	18973.9	18706	14992.1	0	7031.33	7371.78	15570.3	16004.5	12453.8	11407.8	10734.3	11629	7134.7	8320.28	10773.7	14221.4	9198.59
M70T7	1.94924	-0.962909	-4.80053	5.24454e-05	7.97744e-05	DOWN	70.1	70.1	70.1	7.15432	7.14045	7.8048	7.52361e+06	6.69507e+06	1.29552e+07	1.23291e+07	5.00324e+06	4.65344e+06	7.8179e+06	6.88032e+06	3.43333e+06	3.40545e+06	1.13745e+07	1.07513e+07	1.01261e+07	9.43025e+06	5.61942e+06	5.06018e+06	6.51887e+06	6.30621e+06	3.45659e+06	3.37088e+06	4.29844e+06	4.13292e+06	2.98806e+06	550.551	4.94566e+06	4.94454e+06	4.10599e+06	3.76937e+06	4.03932e+06	3.65019e+06	4.06159e+06	3.82609e+06	5.16249e+06	4.76687e+06	2.15559e+06	2.03414e+06	3.21404e+06
M51T24	1.94444	-0.959357	-3.59248	0.000883444	0.000731653	DOWN	51	51	51	24.0561	24.0457	24.0648	92807.1	78084.5	188661	142664	57701.1	46852	103377	100585	49988.5	45765.8	167878	101161	133905	132547	73064.5	59074	69094.8	53088.1	49875.3	44866.8	52423.2	57511.7	30926.8	41.8014	40236.6	46709.9	52302.1	43766.1	26661	31041.1	39066.4	34003.2	64080.5	53660.5	21281.5	26603.9	17594.8
M104T26	1.93678	-0.953663	-8.71835	1.9067e-10	2.11423e-09	DOWN	104.1	104.1	104.1	26.0358	26.0282	26.0405	968264	1.10344e+06	986811	1.05447e+06	853194	884612	972004	1.17085e+06	883163	1.03351e+06	1.06886e+06	1.06658e+06	1.25273e+06	1.34565e+06	1.15578e+06	1.08663e+06	866949	926267	1.24214e+06	1.39101e+06	1.19202e+06	1.22334e+06	476491	670.723	478457	538902	727180	721095	412263	474272	505226	458920	581078	570117	687726	776668	354638
M71T7	1.93299	-0.95083	-4.77263	5.63204e-05	8.27616e-05	DOWN	71.1	71.1	71.1	7.14911	6.58107	7.36155	557575	494315	961745	917014	372406	346876	579707	512121	257446	249719	839248	793979	750334	696628	416211	375179	481919	467155	257847	252127	320497	309581	220962	466.035	369432	370840	307310	280622	301978	269741	304408	285190	385293	355475	163827	158896	240704
M173T28	1.90782	0.931926	3.35699	0.00227837	0.00161761	UP	173.1	173.1	173.1	27.9987	27.9915	28.1654	7649.35	10010.1	3166.48	3923.92	10500.3	11595	7841.7	8761.57	14027	12161.3	7617.56	5406.39	4518.67	8040.64	8612.35	4960.95	7815.96	8748.87	16289.4	7045.33	2685.18	19621.7	24888.4	0	3085.95	3453.81	12880	12196.5	24337.7	22267	29714.9	33606.7	15958.3	18254.4	31269.1	29055	23368.9
M127T26	1.89924	-0.925423	-7.53654	2.50903e-09	1.63009e-08	DOWN	127	127	127.1	25.8719	25.3137	26.2587	12953.3	22665.2	17220.3	17345.3	6702.51	18279.4	19634.2	26976.6	17719.3	21057.2	21851.9	21363.7	14862.9	20676.8	19230.8	19711.1	17652.4	18554.7	18534.1	16637.2	19200.5	16906.1	12748.3	0	4920.33	5573.56	10883.7	9067.08	14481	8956.7	10214.4	10411.1	4271.62	7926.16	15706.4	13596.6	6922.73
M121T24_2	1.89767	0.924227	3.68149	0.00110172	0.00088089	UP	121.1	121.1	121.1	24.1407	23.665	24.6302	88892.7	85565.6	169605	165038	96011.6	94586.3	69642.9	94718.5	70609.7	78491	135897	133343	128955	123783	70713.2	63762.2	132973	132088	107291	103367	41195	43923.2	225767	91.762	149352	169926	211980	209065	98242.9	97215.8	157382	153384	476489	475676	167711	160350	245691
M44T24	1.89434	-0.921696	-3.727	0.000574923	0.000507405	DOWN	44.1	44	44.1	24.0562	24.0446	24.1116	29889.6	26247.3	47745.6	48998.5	16752.2	20657.4	31051.2	31806.6	18439.3	17974.6	43334.5	42746.9	42914.7	38350.5	25600.9	21483.5	21188	18306.1	16423.4	13785.2	18515.4	20009.2	6622.56	836.599	9526.53	8826.11	13646.4	14134.8	9344.82	11674	13074.7	7653.82	16594.8	15953.8	12409	11102.8	7727.16
M45T26_1	1.88359	-0.913481	-10.7256	6.22746e-12	9.7263e-11	DOWN	45	45	45	25.8699	25.8622	25.8794	113640	136619	110255	106055	116810	110669	110419	136904	103592	113299	123940	127411	101498	113158	134074	123168	108902	115641	101927	110093	111209	109926	101679	5020.58	43861.3	46328.9	88919.2	87899.7	74046.8	74954.9	62805.7	57411.8	36560.5	35810.3	69521.5	72995.5	44456
M43T7_1	1.87873	-0.909757	-4.92058	3.45251e-05	6.27008e-05	DOWN	43	43	43	7.15357	7.13963	7.49347	9.88134e+06	8.93016e+06	1.67105e+07	1.56502e+07	6.7631e+06	6.31206e+06	1.02901e+07	9.18614e+06	5.07666e+06	4.65106e+06	1.4633e+07	1.3796e+07	1.31456e+07	1.21185e+07	7.51553e+06	7.16066e+06	8.63066e+06	8.78229e+06	4.73076e+06	4.94081e+06	5.86203e+06	5.62731e+06	4.16446e+06	5567.76	6.75092e+06	6.6492e+06	6.13133e+06	5.35453e+06	5.51693e+06	5.00103e+06	5.54007e+06	5.20349e+06	6.87898e+06	6.35716e+06	2.97616e+06	2.8202e+06	4.43646e+06
M57T19	1.87765	0.908928	4.12488	0.000365445	0.000346295	UP	57	57	57.1	18.542	18.5304	19.0968	56996.5	63764.4	50568.3	70563.6	75488.2	80233.1	88127.4	74704	97557.8	44640.9	60507.7	61772.9	83876.3	81255.2	41690.6	67442.8	70691.8	113198	76269.9	124056	44899.6	68271.5	108676	391842	110861	109020	138832	150951	129022	118766	107125	147157	90178.3	99604.4	64987.5	118456	86520.5
M157T28	1.87144	0.904146	3.41542	0.00225642	0.00160426	UP	157.1	157.1	157.1	27.9963	27.9894	28.0156	41444.5	46344.2	20919.3	19250	60263.6	58981.2	34675.5	45566.9	62882.8	68938.8	38602.8	38697	39077.6	38764.3	49315.6	35886.1	43326.9	38571.4	51358.7	48398.4	20878.6	27815.9	125250	0	2580.52	2226.39	68953.2	73618	105778	112456	151804	154588	75272.6	78532.9	140420	141418	101495
M183T32	1.86629	0.900175	2.7724	0.0109007	0.00577949	UP	183.1	183.1	183.2	32.0615	31.5733	32.0733	16908.3	25809.9	13684.4	12987.7	16264.2	13766.4	16868	33125.9	32503	34583.7	25356.8	21957.5	22968.4	21426.4	33190.3	27350.1	18128.9	17437.7	28256.7	27672.5	24824	26466.5	19494.5	39.5139	6901.45	10898.5	18642.9	20650.8	85120.2	87943.8	28739.4	30755.2	117407	114169	45695.5	47348.7	67592
M77T24	1.85638	-0.89249	-3.55739	0.00102328	0.000828413	DOWN	77	77	77	24.06	23.9354	24.0757	148317	104816	236945	292511	78310.4	75232.5	168859	161203	97779.6	73295.7	255904	208644	219044	216415	204418	223846	95783.5	93696.3	71818.8	95827	61739.5	64583.9	54192.1	1023.72	51637	65681.8	115694	76452.1	62224.4	52999.9	60648.1	68802.8	94220.5	103579	49782.6	53069.7	98789.8
M94T20	1.85428	-0.89086	-3.98499	0.000288244	0.000288771	DOWN	94.1	94.1	94.1	20.1043	20.077	20.1472	43675.3	41017.4	28176	19175.6	20345.2	21490.2	40392.6	52483	46984.1	37145.1	31888.6	23634.5	50211.8	45070.4	50897.6	36131.8	60126.8	52756.9	46537.8	40988.8	25390.1	22283.2	7770.36	247.519	26489.5	27833.2	11637.2	8453.45	22759.7	17305.1	14847.4	11290.2	22325.9	21230.3	10800.4	8241.68	25708.8
M60T27	1.85015	0.88764	2.9367	0.00759576	0.00436864	UP	60	60	60	26.8364	26.82	26.8521	16909.7	16022.7	11942.6	13033.8	15563.4	16601.9	20972.6	19547.5	14710.8	16895.4	12413.9	11503.2	9369.26	9634.06	18390.6	13221.1	13034.8	14050.7	13582	21062.9	12162.1	13710	18902	1086.03	32539	33197.6	19720.8	11678.3	14352.6	16320.1	28878	28326	28101.2	26665.7	75397.3	82516.8	18964.1
M56T7_1	1.84251	-0.881671	-4.88694	3.62622e-05	6.46403e-05	DOWN	56.1	56.1	56.1	7.14777	7.13572	7.16402	332735	304862	574502	530596	231268	219947	343001	306733	179177	159834	486116	462296	438085	404472	250249	249594	284610	307605	161534	176381	200328	196715	144658	383.978	232900	229468	222030	195284	193535	173021	188873	181184	233373	211193	102278	96256.3	152234
M84T11	1.84062	-0.880191	-2.65137	0.0114199	0.00599867	DOWN	84.1	84.1	84.1	10.9155	10.8815	11.6874	89462.1	60244.5	159648	151644	45424.3	42137.5	83935.6	66056	31132.4	23301.5	177534	161557	111760	94946.4	80094.5	71356.9	152551	148685	30094.3	27494.6	21509.1	24420.4	12606.3	40.3641	60808.9	60727.8	15290.8	23199.9	18508	12397.7	54212.7	45636	129037	132668	16089.3	16826.3	33557.3
M69T24	1.83927	0.879129	3.56986	0.0014597	0.00110499	UP	69	69	69	24.1422	24.0174	24.1606	121326	111923	227007	216845	128227	109905	136487	133392	108222	112525	190830	183828	179345	179097	94839.1	82270.8	178933	178925	152232	133221	62805.5	53075.7	308552	926.237	184330	229120	298845	290416	147081	125627	221319	207184	632633	633957	246941	242004	305144
M44T7_2	1.83646	-0.876928	-5.0614	2.23168e-05	4.74711e-05	DOWN	44.1	44.1	44.1	7.15138	7.13963	7.89093	291504	268457	494482	457602	204661	195668	304098	270345	159493	147001	426236	401346	386609	357840	228328	226695	257511	273593	149259	168242	174669	166771	130641	1745.19	202751	199363	193342	169061	163498	151652	166268	156181	206198	190265	96961.1	90742.5	138137
M57T7	1.83524	-0.875966	-4.71603	5.63967e-05	8.28185e-05	DOWN	57.1	57.1	57.1	7.14457	7.132	7.46225	328431	308164	585367	520685	222413	227430	310520	306088	161279	134605	469167	448644	412380	394463	251943	234373	257380	276836	158637	172362	201914	212623	171650	1188.33	259546	234113	226587	196195	196032	178222	174432	154379	198517	197980	97709	85210.9	157756
M135T23	1.83129	-0.872864	-4.3485	8.66411e-05	0.000109757	DOWN	135	135	135.1	22.8014	22.5597	23.181	85644.6	129990	174374	105649	172458	105212	105515	55831.2	165608	120680	65703.4	90682.2	119249	114736	136133	112204	156472	170623	123936	22290.8	77853	65242.7	18927.2	1382.09	113366	40672.2	146025	95371.1	16480.4	56626.2	41915.2	25247.1	69108.2	44600.7	49351.8	59866	112678
M73T7	1.82777	-0.870083	-4.68167	6.56507e-05	8.95718e-05	DOWN	73	73	73	7.14777	7.13572	7.44357	1.43302e+06	1.28757e+06	2.41256e+06	2.2878e+06	984043	923036	1.4974e+06	1.32499e+06	698286	667227	2.11971e+06	1.99321e+06	1.86039e+06	1.72844e+06	1.07194e+06	968625	1.21196e+06	1.18747e+06	672842	668546	881568	848716	623994	2846.07	1.00954e+06	1.01996e+06	877686	803918	846656	760907	837028	788027	993393	921877	442753	428305	655587
M123T26	1.82315	-0.86643	-8.55514	4.33172e-10	3.75965e-09	DOWN	123.1	123.1	123.1	26.0321	26.0243	26.0405	1.10044e+06	1.23809e+06	1.13576e+06	1.18358e+06	990172	969699	1.11841e+06	1.31325e+06	1.06391e+06	1.17938e+06	1.22747e+06	1.20078e+06	1.40043e+06	1.49786e+06	1.26318e+06	1.21405e+06	983682	1.05681e+06	1.36563e+06	1.5243e+06	1.33057e+06	1.35513e+06	565198	873.095	577333	621535	872154	828181	583794	556361	572483	574220	647527	676354	813882	928228	442470
M81T17	1.81938	0.863444	2.1975	0.0336052	0.0147462	UP	81	81	81.1	16.7811	15.9863	16.9862	23535.9	13609	16802.8	21007.5	53970.1	43310.5	27956.2	236669	22768.9	19174.4	30894.4	29223.8	18203.6	14627	21155.4	15817.8	54418.6	46068.5	13868.2	13578.6	26706.9	27251.6	24254.3	10807.8	9352.35	10804.1	141009	117115	72326.8	48084.3	133225	121604	105755	95345.6	65623.9	48588	65652.4
M40T26	1.818	-0.86235	-8.65144	4.35286e-10	3.77118e-09	DOWN	40.1	40.1	40.1	26.0321	26.0242	26.0401	158346	174306	159428	168869	143567	139655	149923	176547	148988	164116	165047	172540	190839	208734	175982	168466	133970	157459	191426	210243	189482	190924	82422.7	313.898	80458.9	80599.1	122887	118177	76261.6	80357.4	81155.6	78385.5	96773.5	96383.3	120183	129897	56312.1
M42T11	1.81697	0.861538	3.13627	0.00410083	0.00265159	UP	42	42	42	11.3169	10.9041	11.3906	34507.5	20864	46450.5	41468.7	77132.1	75953.6	61806.7	56195.1	53345.2	36796.2	36215.2	38011.2	25944	18261.8	30834.7	48842	64109.7	66752	20498.2	21235.4	27219.7	26800.6	75569.5	4246.04	15869.8	56265.8	186224	157545	76056.5	66458.6	163540	153131	84318.4	88638.3	45832.5	62436.8	79524.6
M66T26	1.80587	-0.852691	-8.53814	4.51559e-10	3.85856e-09	DOWN	66.1	66.1	66.1	26.0321	26.0243	26.0399	422629	472045	431666	449643	380630	370303	424372	501317	409219	451188	467231	458618	534609	566904	482462	465798	374092	400676	523468	581046	505167	516643	216549	0	224577	238277	331931	318079	225101	216242	219868	223325	250738	255589	312214	355868	174109
M47T16	1.80479	0.85183	3.77841	0.000956956	0.000783045	UP	47	47	47	16.0035	15.9863	16.0397	10766.5	12814.4	4155.56	7071.45	12950.9	13639.6	10374.5	12852.8	7780.91	11102.5	12062.4	12208.2	14126.4	13788.3	11497.3	10412.2	11766.5	13742.3	9486.46	7951.16	12071.7	10903.7	23025.6	0	216.832	677.397	17713.2	15547.7	26416.7	25307.7	37105.9	33567.4	18163.1	23293.1	18194.2	18310.6	16788
M79T26	1.79852	-0.846813	-8.34291	8.41815e-10	6.36184e-09	DOWN	79.1	79.1	79.1	26.0322	26.025	26.0405	388793	442667	405291	415268	361927	347247	396407	456279	382139	417057	435330	432286	495349	537013	453411	423912	350353	368161	486222	542837	473606	484277	213029	290.314	203100	213575	318476	298194	207210	201492	197075	201537	230987	246349	305881	340950	167055
M61T29	1.79037	-0.840259	-3.62942	0.00082441	0.000690665	DOWN	61	61	61	28.5359	28.5286	28.5401	20703.9	24458.6	13962.2	18697	12586.5	16403.6	46348.5	41515	27888.8	14284.3	26063.5	15238.6	24709.7	17715.4	18591	20396.3	23492.8	20494.7	9475.22	8559.69	12728.1	12155.3	13722.5	654.223	4465.39	4453.85	21148.9	5888.77	13271.5	12213	16372.7	18281.1	9995.87	4224.57	3841.22	4855.02	13393.5
M92T26	1.79032	-0.84022	-8.6664	4.04428e-10	3.59864e-09	DOWN	92.1	92.1	92.1	26.0322	25.5171	26.5812	2.37413e+07	2.6422e+07	2.44378e+07	2.52956e+07	2.16132e+07	2.09979e+07	2.30255e+07	2.71094e+07	2.28797e+07	2.52119e+07	2.61348e+07	2.56385e+07	2.96686e+07	3.13375e+07	2.69578e+07	2.59356e+07	2.11744e+07	2.27741e+07	2.89951e+07	3.19007e+07	2.82698e+07	2.8658e+07	1.2448e+07	9160.19	1.28295e+07	1.37528e+07	1.86427e+07	1.7963e+07	1.27117e+07	1.21344e+07	1.26037e+07	1.24716e+07	1.43197e+07	1.46507e+07	1.74936e+07	1.9716e+07	9.86018e+06
M91T18	1.79008	0.840026	4.58132	0.000100122	0.000123404	UP	91	91	91	18.4368	18.4298	18.4455	10647.6	11326.7	10094.2	9293.48	10665.5	9591.47	13672.8	14725.1	13027.1	15975.1	11746.5	9702.8	13835.5	11196.5	16018.2	14732.8	9232.58	11363.5	13441.1	15370.1	23667	19168.2	18513.7	736.326	12016.8	16560.7	16220.4	13310.1	27544.2	25163.2	31196.8	30526	24605.9	18593.8	30813.8	50584.7	28798.1
M61T26	1.7873	-0.837784	-8.5961	6.70285e-10	5.23439e-09	DOWN	61	61	61	26.0321	25.5895	26.0405	210536	236664	213472	227123	185135	183776	216846	255329	202552	223543	231670	226828	263312	262250	235227	230360	184414	195911	255509	267228	247107	253597	110281	709.144	111852	119849	167528	155880	110190	108652	110346	110987	124411	128682	152353	175170	84512.8
M93T26	1.78636	-0.837022	-8.57746	5.20137e-10	4.20192e-09	DOWN	93.1	93.1	93.1	26.0321	26.0243	26.0397	1.74598e+06	1.95234e+06	1.80173e+06	1.86932e+06	1.5853e+06	1.54812e+06	1.78659e+06	2.07063e+06	1.7043e+06	1.86518e+06	1.94345e+06	1.89656e+06	2.19915e+06	2.3263e+06	1.99429e+06	1.92085e+06	1.56359e+06	1.67595e+06	2.1447e+06	2.3649e+06	2.08911e+06	2.12565e+06	919190	948.203	940683	1.00771e+06	1.40584e+06	1.32518e+06	952546	906215	933116	931360	1.05849e+06	1.07888e+06	1.30835e+06	1.47525e+06	731205
M65T26	1.7863	-0.836972	-6.17467	2.2948e-07	1.04417e-06	DOWN	65	65	65.1	26.0282	25.9891	26.0445	4.29511e+06	5.20978e+06	4.43891e+06	4.97063e+06	3.47619e+06	4.04248e+06	4.73944e+06	4.06108e+06	2.44166e+06	4.56738e+06	4.14237e+06	4.6114e+06	5.79191e+06	6.54121e+06	5.51174e+06	4.82978e+06	3.47175e+06	3.67603e+06	5.65769e+06	6.86153e+06	5.58504e+06	6.09909e+06	2.99234e+06	2073.29	2.48361e+06	3.06115e+06	4.29457e+06	2.2414e+06	3.33556e+06	2.75226e+06	3.25092e+06	235791	2.95835e+06	3.28902e+06	2.82701e+06	2.70557e+06	2.54345e+06
M129T21_2	1.78485	-0.835806	-4.18578	0.000224297	0.000239506	DOWN	129.1	129.1	129.1	21.0084	20.9903	21.0168	1.759e+07	1.88008e+07	1.58204e+07	1.67711e+07	2.87578e+07	2.89461e+07	1.42015e+07	1.71511e+07	2.02609e+07	2.50368e+07	2.11025e+07	2.12495e+07	1.69954e+07	1.77722e+07	2.68515e+07	2.24974e+07	1.89092e+07	2.01547e+07	2.59424e+07	2.84629e+07	2.6512e+07	2.55884e+07	3.03456e+07	936.78	1796.43	1162.76	2.07825e+07	2.08282e+07	1.83294e+07	1.90787e+07	1.92189e+07	1.75447e+07	1140.44	2217.78	1.94048e+07	1.96709e+07	6.32895e+06
M51T25	1.77727	-0.829663	-4.65741	3.28297e-05	6.07642e-05	DOWN	51	51	51	25.2983	25.2903	25.5221	23650.7	16597.6	14678.3	16145.9	35715.8	33920.9	28175.8	21275.4	30703.6	36564.7	21373	20721.1	26042.2	26932.5	44351.6	38494.8	19923.1	20085.9	35505.9	47205.7	26762.8	24034.7	23262.5	5372.53	8730.91	10006.7	16637.9	12705.6	8133.12	7456.77	18378.8	19421.9	9545.85	9945.44	17440.4	24807.9	30310.7
M124T26	1.77118	-0.824709	-8.00517	2.60503e-09	1.67889e-08	DOWN	124.1	124.1	124.1	26.0322	26.0243	26.0405	70524.8	79021.3	71230.5	73717.8	62221.8	60574.7	71392.5	83812.9	69680.6	72582	77952.2	75537.3	87706.2	95182.6	83320.5	78509.1	62348.6	65549	85541.7	94663.7	81983	85768.2	34002.1	0	34946	37818.6	55708.4	54731.4	38798.4	38151	35198.5	40367	41506.2	45198.6	55875.2	61563.5	28087.5
M80T25	1.77053	-0.824183	-4.13554	0.000168969	0.000191838	DOWN	80.1	80.1	80.1	25.2984	25.2903	25.3037	12420.4	8221.02	6541.23	6203.71	15718.5	16558.9	13280.1	9466.25	16809.8	16552.5	7882.96	9204.24	8908.47	10896.2	21472	18545.3	8881.75	10901.6	14932.5	23302.4	12553.4	11528	10452.3	1696.37	3617.59	3637.7	7111.55	4600.48	5304.83	3143.21	8947.63	9525	4622.74	4538.14	10623.9	11532.5	14890.9
M61T21	1.76871	-0.822695	-2.02479	0.0493636	0.0197795	DOWN	61	61	61	21.2758	20.9828	21.2874	78497.1	15285.6	209162	179564	48688.8	37377.5	92058.6	19754.9	196218	171498	219147	178211	64704.4	56338.3	216912	168018	61375.5	54689.4	32304.1	24772.3	34220.2	32153.9	16586.3	689.488	146675	145950	17924.7	16707	58059.2	46929.7	35019.5	32500.1	32283.8	32319	13254.1	14169.1	246174
M57T23	1.76799	0.822113	2.09486	0.0476588	0.0192775	UP	57.1	57.1	57.2	22.8057	22.4147	22.8251	66843	52195.8	45561.3	37799.2	5725.24	37301	50398.9	60171.3	55947.8	70941.7	52305.5	43616.5	38357.4	38794.3	42540.4	32953	51724.5	55721	63272.4	61458.3	38269.6	26072.6	39450.5	3434.44	90024.4	54684	36391.6	57887.1	69154.4	65612.5	45750.6	63895.9	83089.1	116302	20364.6	201808	44169.9
M44T13	1.76397	0.818827	5.00532	3.0881e-05	5.84447e-05	UP	44.1	44.1	44.1	12.7444	12.7233	12.9619	129108	196280	90430.4	116339	151995	196612	81486.7	133270	148002	168715	102711	108869	181220	132402	197960	198763	164082	203736	136163	195279	167014	181254	299554	787.25	141007	91221.7	219618	224291	304985	374643	294493	279399	241341	213906	264154	274068	376763
M58T7	1.75059	-0.807841	-4.49444	7.44455e-05	9.77063e-05	DOWN	58	58	58.1	7.16099	7.1476	7.43202	161869	110402	187967	235029	111982	125056	230913	223611	151446	77860	266136	204082	245857	233138	145114	133599	174127	139003	67435.4	103790	97263.5	79227.7	49583.1	1132.05	111374	135586	129050	74780.9	112654	107065	93093.4	88796	129779	137456	10720.5	54726.5	89670.5
M101T18	1.74571	0.803817	2.36768	0.0264053	0.012114	UP	101	101	101	17.6358	17.1664	17.6502	64634.1	64355.5	72273.5	37838.6	59848.5	43139	106733	103712	130787	124138	100562	80720.2	48172.5	40782	77249.6	38183.9	68046.1	78819.7	56337.1	62480	62326.5	77961.1	36536.7	0	325562	420253	95326.9	66570.7	107995	69238.4	302215	233337	125816	122406	140154	138242	70776.2
M103T13	1.74357	0.802046	4.9496	4.38232e-05	7.23106e-05	UP	103	103	103	12.7407	12.7244	12.7635	62083.7	112448	71103.7	69931.5	92558.8	113336	88807.3	94433.3	102244	96246.4	68004.8	63019.8	103421	84062.9	120663	119579	95088.6	121370	89615.5	120599	95882.6	99793.1	182473	41.1231	75428.9	56322.2	156228	133598	191877	228883	173616	175707	142896	131413	159169	166136	234554
M141T22	1.74073	0.799692	2.09674	0.0441612	0.0182174	UP	141.1	141.1	141.1	22.4742	22.4454	22.8026	52923.9	61555.1	17023.1	20879.9	116127	112940	41706.3	58637.8	196338	275724	46620.9	39695.4	35820.5	38069.1	114787	92724.8	53914	39008.9	201811	178873	92453.8	90898.4	212968	0	2224.53	28361.7	39513.1	63253	336976	328474	187194	167753	119875	114133	452247	448883	171899
M41T7_2	1.74055	-0.799541	-4.22864	0.000155354	0.000179169	DOWN	41	41	41.1	7.15498	7.14042	7.43202	663662	595611	1.66986e+06	1.62943e+06	772008	567122	1.38851e+06	1.25345e+06	1.22491e+06	617347	1.16153e+06	1.32688e+06	1.55426e+06	810369	851467	1.07679e+06	860430	1.19178e+06	416886	893361	464294	538666	539083	2032.03	630762	658126	1.084e+06	891726	732602	595139	665434	584266	569393	602959	101947	90195.3	506852
M107T25	1.74044	-0.799449	-4.58473	4.32058e-05	7.17273e-05	DOWN	107	107	107	25.2989	25.2903	26.0204	90351.7	54500.2	54746.2	57090.4	122840	109360	100873	79369.9	122277	126931	62773.2	70809.9	85876.3	83178.2	154117	150910	71917.9	85040.8	119066	162634	73630.3	94138.6	80430.7	17670.3	31143.2	36880.2	61015.4	44766.7	34873.7	34931.8	72397.6	74677.6	39949.8	37270.5	72801.5	68359.4	94577.8
M57T12	1.7301	-0.790857	-4.887	2.36508e-05	4.92371e-05	DOWN	57.1	57.1	57.1	12.2802	11.9566	12.2906	37701.4	45687.1	24014.9	24811.9	29641.4	25966.3	31685	44072.3	43669.9	34079.1	22040.7	21840.6	31731.2	24954.9	70203.8	53536.4	21935.9	25001	30878.9	34579.9	41951.9	42673.5	21247.6	998.224	17726.2	15205.4	35043.3	30712.1	22180.7	25632.8	11105.4	16084.2	14217.4	18707.4	17899	22414.6	25164.7
M70T27	1.72664	0.787963	2.38903	0.0248466	0.0115214	UP	70.1	70.1	70.1	27.1157	26.9441	27.1246	56944.1	34963.4	49113.5	59988	51044.9	139146	81879.1	42332	57707.1	70326.8	71698.8	50391.1	31680.6	38443.2	37542.4	40131.5	47415.1	47850.1	52130.9	61483.8	42533.6	81439.3	83786.3	813.571	65317.5	70729.1	37524.8	113878	56857.7	226760	88842.7	275925	88174.8	44774.4	111972	36827.4	132836
M143T22	1.72332	0.78519	2.12132	0.0413051	0.0173199	UP	143.1	143.1	143.1	22.4733	22.4454	22.5012	14668	18123.2	6013.88	6345.71	34744.5	30669.1	11967	22005	83011.1	79823.8	14096.5	12764.9	11277.7	10425.6	35318.3	29135.9	16127.2	13867.7	61704.7	55676.4	22308.4	25825.2	65704.6	0	2029.82	2450.49	19056.9	21582.6	105232	92230.2	59439.6	53265.6	37248.5	32881.6	133444	129301	54988.9
M112T24	1.72027	-0.782635	-4.32113	9.34674e-05	0.000116469	DOWN	112.1	112.1	112.1	23.7819	23.7684	23.795	26759.2	21185.3	16458.7	11573.8	14205.5	15967.5	29660.8	32518.6	27580.7	24357.1	24138.4	10700.2	16294.2	13725.8	27196.5	16781.5	24734.1	18256.2	14274.5	16143.7	18245.8	11110.5	14747.7	35.5279	6278.69	9970.64	15652	6753.62	25445.4	8154.84	17415.9	6225.58	17318.1	7232.55	6293.11	6308.27	19569.2
M88T26	1.71629	-0.779297	-8.33684	3.17418e-09	1.9529e-08	DOWN	88.1	88	88.1	26.0321	25.5908	26.0401	26305.5	29854.6	26564	27310.1	23538.2	25496.3	25363.1	28852.2	26132.3	24621.4	29466.5	21797.7	28766.5	28172.6	25901.7	26649.5	23406.7	24768.8	28861.5	27673.4	25480.1	33643.2	14491	149.256	12786.5	18253.1	21098.4	17931.9	11315.1	11308.9	15115.3	14922.6	16020.6	20129.5	16306.6	18647.2	10843.8
M159T24	1.71386	-0.777246	-3.97004	0.000295789	0.00029428	DOWN	159.1	159.1	159.1	24.3745	23.7833	24.6223	19871	32937.4	14095.2	12595.8	14386.7	17393.4	20654.4	32565.3	30302.8	28882.5	17911.6	20868.6	19890.2	17844.3	31293.7	24494.9	17121.8	21503	26627	22064.5	43071.3	50723.7	13588.4	45.4418	4021.57	4760.55	7223.17	7466.88	28844.2	19733	12211.4	10236.9	22800.2	13963.8	19909.1	20431	18170.9
M80T26	1.70809	-0.772383	-7.39581	1.68108e-08	8.7385e-08	DOWN	80.1	80.1	80.1	26.034	26.025	26.5773	30064.5	35832.7	30743.4	32533.8	28593	27718.3	33942.4	39244.3	29959.1	35221.1	36041.6	34558.3	40549.5	41046.7	36685.2	34926.2	28016.2	29718.3	38513.3	43298.4	34551.2	37525.4	17475.7	0	16234.8	17085.9	25182	24883.8	18028.2	19796.7	17652.1	17692.1	16934.5	20381.4	25959.4	34588.3	12951.7
M105T26	1.70262	-0.767755	-7.32033	1.35246e-08	7.20109e-08	DOWN	105.1	105.1	105.1	26.0359	25.505	26.5812	217050	239401	214198	216670	183553	180999	215048	256103	200352	228940	223250	236639	276878	295891	250969	232662	184906	200565	266466	286392	254360	259705	109824	698.831	104444	112632	167709	159338	110801	118552	116255	116823	117782	125813	189302	206485	90159.3
M121T26	1.70156	-0.766854	-8.61844	4.83593e-10	4.02375e-09	DOWN	121.1	121.1	121.1	26.0359	26.0268	26.6261	141008	144634	145067	140554	127631	121214	127010	157520	124292	152868	156107	153752	167276	119721	166349	148156	127989	133442	167093	171986	162605	154299	80064.8	275.521	70269.8	77871.3	110030	108256	78961	73445.8	76939.7	80997.1	78052.6	87740.4	114076	130342	52869.4
M108T25	1.70155	-0.76685	-4.01415	0.000250616	0.000260246	DOWN	108	108	108	25.2986	25.2903	25.3059	117769	62423.5	49528.4	68468.6	129502	133988	133342	100981	163653	182608	91386.3	75235.5	104949	106305	183682	211582	100081	89873.7	144416	204849	115944	101491	98181.4	37013.7	38029.9	44093.3	72951.5	64354.5	43529.8	37202.6	93803.9	79597.5	39943	32964.4	80391.5	110938	131552
M41T26	1.70032	-0.765807	-4.56385	4.33256e-05	7.18411e-05	DOWN	41	41	41.1	26.0243	25.3096	26.0477	265432	198094	162601	304962	189700	167786	404833	367581	384783	211539	239968	272960	242302	359712	164442	183564	178089	272113	373724	349124	336527	337298	160125	2262.34	157519	182421	121817	103094	53298.9	71657.6	71983.3	186377	222569	249985	83472.1	270542	191766
M94T26	1.70019	-0.765694	-7.82257	6.6814e-09	3.78256e-08	DOWN	94.1	94.1	94.1	26.032	26.0242	26.5757	62982.9	65595.8	73910	75282.2	64106.5	65475	76662.1	85105.2	72385.8	76115.6	79574.7	81563.4	89598.9	81832	85364.4	73946.4	63515.6	71917	86703.3	87103.4	79830.3	91428.7	36117.9	273.342	37315.1	42773.7	60934.5	51316.4	41971.2	37236.7	40111.2	41335.2	46335.4	45674	52908.2	65014.6	32308.9
M76T13	1.68654	0.754068	4.73237	7.71063e-05	0.000100121	UP	76.1	76.1	76.1	12.7393	12.7233	12.7596	25641.4	39217.3	24543.6	25007.4	36201.1	40397.3	31118	33211.6	38156.1	35241	23866.9	24008.1	36773.1	29663.6	42031.8	42852.5	35601.9	42831.2	30772.4	43911.4	34252.2	36373.2	61968.6	0	27474.9	19046.5	54088.7	47246.8	66492.4	79913.1	61522.2	60106.7	49672.3	45235.4	55591	58887.6	82236.3
M47T13	1.68409	0.751965	4.81314	5.69693e-05	8.32422e-05	UP	47	47	47	12.7407	12.7244	13.5554	146629	229556	137634	121500	204670	235869	186374	198143	224840	207555	140712	135754	212661	165811	241331	245841	206326	248692	181691	250179	186171	157453	361313	0	157872	118698	312974	270650	379895	447137	351261	347957	276354	260684	316366	338190	461141
M75T13	1.679	0.747605	4.76075	7.16867e-05	9.51471e-05	UP	75	75	75	12.7429	12.7244	12.7635	820473	1.3179e+06	820290	808113	1.14638e+06	1.28603e+06	1.0173e+06	1.08161e+06	1.21899e+06	1.14178e+06	766089	769330	1.16552e+06	944040	1.34882e+06	1.34598e+06	1.16627e+06	1.37949e+06	988477	1.40668e+06	1.11281e+06	1.16741e+06	2.0225e+06	281.765	877659	651974	1.74447e+06	1.50947e+06	2.1223e+06	2.53237e+06	1.98459e+06	1.95502e+06	1.59255e+06	1.45555e+06	1.78743e+06	1.87758e+06	2.62772e+06
M139T33	1.67892	0.747532	3.85682	0.000425971	0.00039346	UP	139	139	139.1	32.8074	32.6042	33.4126	7959.33	4286.02	8348.61	8142.91	7946.54	9330.99	5378.77	4633.6	5501.62	5406.85	9422.35	8832.82	17395.3	18630.2	3351.79	3561.08	8248.45	5249.05	6924.79	6322.96	8940.11	8297.2	15948.9	1163.74	20216.6	21669.8	11554.5	7385.98	17630.3	5106.91	11984.3	12399.5	12574	14273.9	12767.2	10637.5	10817.4
M88T15	1.67757	-0.746377	-5.00216	1.78079e-05	4.08877e-05	DOWN	88.1	88	88.1	15.1735	15.0713	15.6012	4.96285e+07	3.55624e+07	3.33545e+07	3.028e+07	3.68167e+07	3.40089e+07	5.30228e+07	3.9972e+07	4.93934e+07	4.61187e+07	3.98792e+07	3.47992e+07	3.63246e+07	3.09144e+07	5.14681e+07	3.98338e+07	5.27476e+07	4.88442e+07	4.66648e+07	4.15698e+07	3.29154e+07	3.23103e+07	2.08812e+07	9939.3	2.64619e+07	2.62135e+07	2.04001e+07	2.01434e+07	3.6225e+07	2.9549e+07	2.44169e+07	2.10425e+07	3.57076e+07	3.25957e+07	1.69653e+07	1.27473e+07	4.51254e+07
M134T23	1.67728	-0.746122	-4.07492	0.000199976	0.00021927	DOWN	134	134	134.1	22.7987	22.7817	23.4824	48639.5	86267.5	106036	69058.2	109870	69796.9	78746.4	38749.1	96306.4	78947.9	49336.3	54707.6	74961.5	72555.6	77204.2	70306.8	80050.5	106960	83817.4	18477.2	52214.7	42809	50987.6	837.532	68483.9	27442.4	108245	58853.9	32610.6	38938.5	36697.8	13811.4	51026.6	10379.8	34141.2	39769.2	68046.2
M143T18	1.67079	0.740529	2.06122	0.0511616	0.0202987	UP	143.1	143.1	143.1	17.6376	17.6061	17.6526	20223.1	22032.9	18719.7	18161.7	13603.3	10542.2	23780.1	25311.3	14586.9	17844.8	23582.2	20997.8	11795.4	10067.7	17811	10106.7	24131.8	19409.6	21159.1	17128.3	21709.9	17962	12036.4	0	99193.2	114877	21366.4	12571.5	24655.5	19115.1	31140.1	20604.2	38160.4	39624.1	40447.6	37067.7	19466.8
M43T20	1.66791	-0.738043	-2.95032	0.00599823	0.00362868	DOWN	43.1	43	43.1	20.1101	19.927	20.1433	3.34553e+06	3.2355e+06	2.50191e+06	2.04457e+06	2.10527e+06	1.90041e+06	2.50177e+06	2.76044e+06	2.06828e+06	2.31612e+06	1.8922e+06	1.76396e+06	2.44368e+06	2.28971e+06	4.18514e+06	2.84757e+06	4.69572e+06	3.74477e+06	2.83152e+06	2.51803e+06	2.34349e+06	2.24317e+06	403678	10402.5	2.30173e+06	2.34037e+06	1.47506e+06	546122	1.16986e+06	1.27244e+06	927763	693468	1.33942e+06	1.17281e+06	596677	1.11821e+06	2.78567e+06
M157T18	1.66695	0.73721	2.06412	0.050904	0.020225	UP	157.1	157.1	157.1	17.6375	17.6061	17.6476	20156.1	13222.7	18173.5	14339	13309.3	9321.2	17843.2	21788.5	17519.3	15587.9	21004.4	19262.7	8628.77	9226.97	16647.3	10001.9	19056.6	18018.4	17262	13601.4	18794.8	17657.3	11316.3	0	83804.7	101695	19644.3	13470.2	24686.6	15370.3	29648.6	19507.9	34240.9	33582.1	34810.9	33136.9	12054.1
M115T20	1.66494	-0.735472	-2.56056	0.0155675	0.00774717	DOWN	115.1	115	115.1	20.1121	20.0304	20.5498	1.82943e+06	1.80961e+06	1.30944e+06	1.15311e+06	1.11811e+06	951474	1.74849e+06	1.59759e+06	1.05904e+06	1.3984e+06	1.15323e+06	977051	1.34005e+06	1.04052e+06	2.57594e+06	1.69766e+06	2.55798e+06	1.93787e+06	1.5446e+06	988568	1.14296e+06	1.07777e+06	206270	0	1.34602e+06	1.29801e+06	948176	317004	692286	694424	504663	273802	10671.9	706750	141259	590360	1.36602e+06
M106T26	1.66337	-0.73411	-6.21756	6.30558e-07	2.6479e-06	DOWN	106.1	106.1	106.1	26.0359	26.0282	26.0438	14446.3	16211.5	16245.4	16691.9	12193.6	12501.7	16159.7	16476.4	16563.4	16249.6	16580.1	16900.9	19106.8	19449.6	17077.2	16180.5	12600.1	14478.6	17594.1	21558.5	16203.4	19236.8	8105.11	0	4554.68	7896.66	11462.7	11129	9006.44	8593.23	5765.52	7026.54	7816.79	7858.91	17254.9	16569.3	7165.9
M158T20	1.66202	-0.732937	-3.79676	0.000524284	0.000468372	DOWN	158.1	158.1	158.1	20.1003	20.0652	20.1314	473382	430737	360566	284462	322485	243433	624425	626034	483734	348299	401208	291191	409010	334933	611972	418248	448859	515906	384882	329713	298917	281242	83576.2	0	313361	377966	165347	108270	301682	244777	212323	141940	269303	235303	131042	120990	331398
M74T21	1.65948	-0.73073	-4.05381	0.0002778	0.000281018	DOWN	74.1	74	74.1	20.9921	20.6255	21.2641	2.40905e+06	2.37797e+06	2.03862e+06	2.32633e+06	3.46085e+06	3.52158e+06	1.55123e+06	1.41901e+06	2.29398e+06	3.0585e+06	2.44867e+06	2.85665e+06	1.90627e+06	2.22428e+06	3.29846e+06	2.81682e+06	2.51033e+06	2.63838e+06	3.03965e+06	3.52778e+06	3.20634e+06	3.3064e+06	3.65538e+06	510.634	240625	920494	2.26447e+06	2.60255e+06	2.09291e+06	2.30476e+06	2.28731e+06	2.10234e+06	839919	67448.3	2.49497e+06	2.46892e+06	22324
M58T13_1	1.65859	0.729957	4.81158	5.7806e-05	8.38539e-05	UP	58	58	58	12.741	12.7244	12.7635	30470.1	44328	30123.5	23656.7	39696.9	43925.1	32824.1	37570	42508.8	40773.4	29635.4	24876	40145.4	35060	48873.8	49846.5	40192.2	49869.5	33539.6	48633	38239.8	41069.4	66458.4	1122.13	32277.3	27772.3	63019.8	50938.7	77763.1	83974.2	64766.5	69595.6	54090.2	47470.1	61572.1	62686.2	91800.4
M91T26	1.65811	-0.729539	-8.19865	7.5128e-09	4.19064e-08	DOWN	91.1	91.1	91.1	26.0321	26.0282	26.5757	3.55603e+07	3.89312e+07	3.74894e+07	3.85682e+07	3.40779e+07	3.41945e+07	3.33145e+07	3.83282e+07	3.34326e+07	3.79362e+07	3.73287e+07	3.75676e+07	4.11596e+07	4.34992e+07	3.93228e+07	3.83974e+07	3.41826e+07	3.50436e+07	4.08596e+07	4.42937e+07	4.06285e+07	4.10417e+07	2.06213e+07	17217.5	2.09619e+07	2.19343e+07	2.94845e+07	3.02551e+07	1.92428e+07	1.99581e+07	1.94069e+07	2.02925e+07	2.31677e+07	2.35281e+07	2.92653e+07	3.12142e+07	1.6033e+07
M45T26_2	1.65767	-0.72916	-7.44727	1.05401e-08	5.74158e-08	DOWN	45.3	45.3	45.3	26.0322	26.0243	26.0405	45636.3	51439.2	45946.8	45270.6	41558.7	45108	46423.3	58359.5	47616.8	48544.9	56142.8	40746.8	58652.5	60185.4	44737.5	51312.9	41527.6	42630.4	54721.6	57978.6	47190.6	59627.3	24537.3	0	27401.2	27300.6	44514.5	35731.3	30223.9	25927	23362.4	28638.3	33091.5	31674.6	34004.6	41531.1	18075.5
M158T22	1.65612	0.727804	2.0122	0.0522795	0.0206165	UP	158.1	158.1	158.1	22.4737	22.4454	22.5012	28932.5	36001.7	10572.7	9227.92	62688.9	60985.6	28605.8	42347.9	153172	149335	27556	26375.3	22938.2	24014.5	66621	54601.2	32107.1	30817.8	115504	106992	49950.1	51694.7	122680	0	1911.78	2102.82	38207.9	39270.6	197245	171941	107444	98774.8	70540.4	68212.8	246537	240206	97998.4
M70T18	1.65443	0.726338	5.65592	6.5821e-06	1.9009e-05	UP	70.1	70.1	70.1	18.4291	18.0933	19.0733	213845	293316	143889	159987	220903	222562	204203	285786	239623	251207	187893	192185	222506	211219	269881	235308	218100	216532	214651	243522	256647	280425	386318	48127.2	264372	286013	238384	219928	462461	439930	471079	453116	340161	350323	466768	465927	454620
M157T26	1.65398	-0.725944	-2.97527	0.00502894	0.0031411	DOWN	157.1	157.1	157.1	26.1376	26.1259	27.0111	22487.8	75428.4	19938.6	20539.5	17940.8	18368.9	24205.7	73342.7	45894.9	49211.8	34119.9	35636.6	32961.2	35981.9	62514.4	43933.7	31037.2	30486.9	52424.2	52056.8	86656.1	86100.2	15308.9	0	7487.08	13430.8	9712.04	10307.6	45666	46055.7	16575.3	18576.5	52789.3	53661.3	42378	39138.6	28693.7
M100T20	1.65192	-0.724144	-5.73561	9.83657e-07	3.8681e-06	DOWN	100.1	100.1	100.1	20.1003	20.0615	20.1277	29544.4	38866	33127.1	23776.4	26802.1	24308.7	52304.9	47886.7	38894.3	30604.3	36129.3	27415.2	35416.8	29001.4	45939.8	41359.4	35086.2	39361.2	34553.1	34229.1	31402.4	27677.4	9646.83	0	33079.5	23020.7	17871.2	15650	29337.6	23787.9	21299.7	16969.6	23477.7	23629.2	17045	14997.4	33158.1
M73T20	1.65167	-0.723926	-5.11737	8.88373e-06	2.42005e-05	DOWN	73	73	73	20.1003	19.7838	20.1238	4.10229e+06	3.80061e+06	3.79955e+06	3.23422e+06	3.39842e+06	2.81822e+06	6.27406e+06	6.28358e+06	4.99818e+06	4.00418e+06	4.20349e+06	3.27928e+06	4.38026e+06	3.54594e+06	4.69294e+06	4.70886e+06	3.88664e+06	4.74113e+06	4.13076e+06	3.82859e+06	3.69191e+06	3.28185e+06	1.06643e+06	1031.21	3.87561e+06	3.80565e+06	2.01268e+06	1.57317e+06	3.4056e+06	2.64262e+06	2.36903e+06	1.85007e+06	2.96358e+06	2.67733e+06	1.5575e+06	1.44171e+06	3.6514e+06
M43T32	1.65005	-0.722509	-3.60612	0.00105811	0.000851856	DOWN	43	43	43	31.9243	31.5656	31.935	90276.3	79723.7	71669.1	81866.9	55603.9	85661.9	127536	117617	99289.2	59516	110204	83706.6	72392.5	225881	58714.2	67330	88427	70746.1	71214.3	55133.6	38471.5	50862.3	51967.2	15091.5	30638.8	34975.5	72463.1	44536.7	121924	47192.3	54754.9	49468.8	51996.8	37314	53963.3	47120	40025.8
M151T23	1.64906	-0.721647	-4.06137	0.000208755	0.000226698	DOWN	151	151	151	22.7988	22.7854	22.8213	269340	445494	557437	357976	572637	364991	417355	185047	516360	410882	271793	297189	424452	397246	434559	396217	448472	561144	446352	100788	283032	215800	251044	3820.02	375864	150201	566180	323764	174129	204300	205626	66434.2	241064	157207	174322	203588	369564
M74T9	1.64836	0.721029	4.14133	0.00030812	0.000303346	UP	74	74	74	8.71737	8.71043	8.73318	34532.3	36354	17814.2	16197.2	26631.8	26053.3	42109.8	39583.3	35997.3	34795.6	24052.7	25770.3	39159.9	36970	33820.6	37969.3	32977.6	32756.8	37840.8	33270.7	18177.9	18460.2	34722.4	0	76284.3	81427.7	49676.5	43064.1	47169.7	36561.9	46764.1	37860.4	63703.4	56027.7	45848.8	36279.8	69052.4
M152T23_2	1.64696	-0.719804	-3.75164	0.00053293	0.000474725	DOWN	152	152	152	22.7962	22.4789	22.8179	30101.3	40819.8	57686.4	40999.1	65815.9	41824.7	50469.2	22757.7	64877.6	49011.6	31206.1	31642.1	45199.9	49645.4	53703.9	46464.7	55249.2	62927.5	45781.3	7897.44	33037.2	24047.9	29863.8	274.14	45080	11476.3	69389.4	35892.1	22410.8	22217.4	23463	6531.91	28897.5	17617.4	18100.9	20884.1	45063.3
M172T22	1.64645	0.719358	2.01627	0.051839	0.0204917	UP	172.1	172.1	172.1	22.4767	22.4495	22.5012	60071.1	80931.9	22662.4	24194.1	130667	127355	57986.2	89043.8	317186	308733	61030.9	57415.9	47293.9	50922.4	134056	113688	63566.3	66639.5	245483	218004	107639	109469	255233	0	3005.69	5165.08	78876.8	80945	408889	356845	222550	202028	148552	141464	510714	495591	203443
M133T23	1.64299	-0.716327	-4.1772	0.000145837	0.000170072	DOWN	133	133	133	22.7984	22.355	22.8213	406163	644050	771412	515796	797034	526760	596434	307316	725489	573829	383195	420929	592773	551566	600818	567039	631939	776659	622710	145510	388035	311388	362514	6810.62	531680	218233	796208	450259	259740	293999	288631	99699.4	346902	222951	252570	293870	519340
M45T12	1.64257	0.715959	5.54523	1.24548e-05	3.15729e-05	UP	45	45	45	12.1038	12.0912	12.1336	70346.9	73288.1	72075.6	58405.5	67230.7	74970.8	74580.3	74073	83852.5	70078.9	77897.9	66732	71186.3	61346.5	74348.5	71928.9	75241.2	80070.8	76976.5	87525.3	55021.6	59112.9	146882	7946.85	98245.8	97384.7	126683	117030	93033.1	107597	138893	133854	134101	133320	120388	127820	154196
M44T18_2	1.64251	0.715899	5.20083	1.60941e-05	3.81025e-05	UP	44.1	44	44.1	18.4299	18.0891	19.0733	24754.5	35858.2	23227.7	23338	28156.5	30639.5	23258.5	33140.3	28028.2	27771.9	30976.6	26149.4	33729.5	27035.4	38347.9	32095.6	30137.5	40647.5	31229.4	53893.6	31748.9	34842.3	44488.9	11019.7	68353.1	60277.2	31284.9	51880.6	59107.9	52031.7	58711.3	54291.4	35644.1	34080.7	56511.7	48258.7	53813.6
M77T25	1.64091	-0.714496	-4.75236	2.59935e-05	5.21631e-05	DOWN	77	77	77	25.3016	25.291	25.5171	92847.6	64831.5	46667.7	50493.8	94227.8	103873	103405	72180.8	110232	97711.3	64868	60851.5	62791.6	81823.5	122753	127552	67695.4	58914.9	94239.6	125296	74875.1	54490.9	71580	20985.2	35958.9	31662.7	48612.9	53271.4	33335.7	35866.5	33098.7	67069.4	38318.4	44195.6	68789.1	75928.5	87186.3
M75T26	1.63937	-0.713139	-5.58201	3.52648e-06	1.13399e-05	DOWN	75	75	75.1	26.0359	25.5908	26.0478	132365	153819	109577	220367	145267	162219	163609	169596	197693	114701	163452	210219	135337	289960	207526	197780	190524	177769	258985	310150	263086	249751	133571	2068.28	118949	123331	158196	105474	141255	134351	123024	131635	119908	117571	114859	125543	94749.2
M56T13_1	1.63282	0.707369	4.50329	0.000139153	0.000163562	UP	56	56	56	12.7363	12.7244	12.7635	90560.4	130397	83579	90758.7	108031	138371	105940	114629	123972	122460	83525	85275.9	117105	94553.2	145823	138933	118158	148694	109495	148511	103761	106452	208501	1342.38	107339	73398	132074	154611	216364	257929	192712	203312	148017	145608	188414	198650	268354
M50T26	1.62996	-0.704838	-7.66963	2.39498e-08	1.1938e-07	DOWN	50	50	50	26.0321	26.025	26.0377	864687	919019	894228	927359	831367	764211	936412	1.09517e+06	895833	873525	1.0235e+06	942796	959994	832244	986193	1.01521e+06	812274	768932	942598	913931	851515	932480	484464	211.501	488563	529401	733138	693628	502093	471992	488447	489540	554182	565667	681295	771313	384463
M87T20	1.62979	-0.704684	-2.80573	0.00856018	0.00478463	DOWN	87.1	87	87.1	20.1083	20.0574	20.1472	844228	756381	641083	522420	488129	441749	867556	928065	719529	676069	615991	526935	661006	565078	1.14532e+06	778963	1.19575e+06	992892	761618	597610	554092	463923	110066	68.4055	594770	605811	132906	176328	520406	386566	305249	131478	456551	376779	188492	128415	676945
M136T20	1.62789	-0.703003	-3.244	0.00247017	0.00173264	DOWN	136.1	136.1	136.1	20.1081	20.0846	20.14	46989.1	43933.9	37684.6	29544.3	32214.4	24184.2	62955.4	64344	50640.2	39568.3	40644.5	28765.8	41278.9	29723.5	67035.7	47744.4	72256.7	59335.5	42273.3	35638.9	29829.4	29852.8	8248.14	0	39170.5	38988.5	16105.8	10906.8	31868.4	23585.4	23243	17671.8	26673.4	25063.4	14747.9	11938.9	37762.6
M88T18	1.62565	0.701013	2.06182	0.0504939	0.0201071	UP	88	88	88	17.6364	17.19	17.6526	225927	10192.7	201369	178606	157334	144137	281769	289103	248030	177903	248326	209151	125144	103755	189450	121955	232631	182509	210037	183387	192009	201103	114477	38.8011	943066	1.1266e+06	275175	129919	291628	183189	277459	168034	379799	353901	377967	360219	182280
M61T24	1.62325	-0.698884	-4.46741	6.4095e-05	8.8329e-05	DOWN	61	61	61	23.7668	23.7571	23.9528	20643.7	19140.4	19951.7	18166.2	9222.6	13976.4	20496	23000	15201.1	11886.3	15956.3	14121.2	11395.8	10355.7	9556.14	11825.8	12156	9573.59	14453	13426.7	7200.38	8765.52	10680.6	157.099	10449.9	12560.4	12122	6817.95	9750.63	7126.87	8666.44	7921.3	9723.95	11252.7	5720.88	7242.74	17637.9
M44T21	1.6231	-0.698748	-3.84369	0.000455058	0.000416148	DOWN	44.1	44	44.1	21.0051	20.9712	21.2874	93607.1	94467.5	82390.7	79276.5	155449	148035	48165.8	97570	97720.8	135043	93391.9	116687	78183.5	83855.6	129324	96825.1	93330.6	94741.6	129682	163723	131809	122272	152592	1191.4	16885.4	23502.3	90859	113783	82733.4	97042.6	101196	83426.2	45402.1	16620.9	91984	97635.4	13444.9
M157T22	1.61905	0.695144	1.97074	0.0570332	0.0219584	UP	157.1	157.1	157.1	22.4747	22.4454	22.5012	232721	308458	95753.1	91206.3	496175	490025	228933	340661	1.20448e+06	1.17313e+06	232150	220571	198612	195524	515889	432522	256741	254182	914578	843558	416373	419384	973239	0	27679.6	20277.7	297210	306981	1.53873e+06	1.33862e+06	843844	766865	551747	526562	1.91929e+06	1.86192e+06	778072
M75T20	1.61897	-0.695073	-2.83088	0.00797948	0.00453564	DOWN	75.1	75.1	75.1	20.1085	20.0922	20.1433	141383	142808	96194.5	78832.8	87131.9	75763.5	148112	153847	121688	102729	94349.9	83672.6	98338.7	90799.6	195926	130287	170520	164013	121054	93873.8	93796.7	79448.8	19046.6	0	105628	104126	38780.8	31975.8	85875.4	74768.6	54837.9	26575.9	55970.5	59965.7	25209.8	30667.8	109164
M53T20	1.61583	-0.692278	-2.42602	0.0211264	0.010055	DOWN	53.1	53.1	53.1	20.1141	20.1002	20.1472	337960	300956	199332	199421	201546	154651	293616	294247	216810	222261	165851	173164	194314	182022	407824	234185	426997	343616	265852	123948	211318	156150	40407.9	300.327	209691	214868	39349.2	60467.8	132757	132337	91035	65717.1	174509	115822	55295	29635.3	211676
M61T18_2	1.61506	0.691585	2.14296	0.042618	0.0177361	UP	61	61	61	17.6278	16.3984	18.0237	32550.3	34604.7	29699.2	25401.7	23707.3	24545.7	41865.9	42412.1	37595.5	27643.4	38529.8	28905.9	24590	19470.2	28047.6	5241.06	35907.2	32885.6	33585.9	26544.9	8748.9	22908.4	25495	0	134868	164844	37811	20760.4	43961	31960.1	42673.5	29538.2	58001.9	52777.9	60564.8	51170.7	29497.9
M54T20	1.61375	-0.690413	-3.01578	0.00503222	0.0031428	DOWN	54.1	54	54.1	20.1081	19.5025	20.5185	315470	281890	235681	199868	198766	168184	333717	371414	271144	238639	223447	192038	268652	215917	407064	290744	424041	358039	275787	228200	218110	187925	43357.8	372.349	236756	240939	89270.4	80680	179340	156418	124519	102944	179770	147845	82865.4	17882.2	227930
M89T18	1.6126	0.689392	2.31032	0.0303406	0.0135814	UP	89.1	89	89.1	17.6374	17.2131	17.6563	19107.3	20176.3	12593.1	19598	15093.4	12786	19269.5	23295.7	21674.7	18221.6	24067.5	17288.5	11506.4	10875.9	17139	9271.97	22624.8	18770.3	19734.6	14260.9	20828.2	15751.6	16076.2	0	81946	92252.5	23021.7	12650	27429.4	17474.5	26103.5	18095	33994.3	33532	36622.3	36462.5	17496.2
M71T18	1.61216	0.688999	5.95618	2.75243e-06	9.19537e-06	UP	71.1	71.1	71.1	18.428	18.0932	18.4368	144991	192720	111926	114412	148412	149981	161870	215671	157256	172557	149169	134634	156545	147884	170915	157887	146071	150970	138813	168823	193856	192711	259746	47918.7	219243	208262	171558	164427	316825	294629	312367	307917	222352	237379	305330	311859	294795
M46T13	1.61162	0.688512	4.60874	0.000103946	0.000127498	UP	46.1	46.1	46.1	12.7393	12.7233	12.7596	201053	313056	198640	195533	272976	304158	243201	256732	291498	270479	187887	184623	282319	228983	321275	320090	277088	326533	239175	331827	264696	277590	466237	206.198	209524	155382	405301	353111	487783	569683	457845	450157	370408	339702	414324	434686	593363
M60T24	1.61018	-0.687225	-4.17556	0.000152085	0.000176067	DOWN	60	60	60	23.7618	23.7514	23.7965	18382.4	17204.3	29219.5	27131.7	15189	16284.6	20372.7	21245.1	14209	10808.1	25158.3	20779.9	13953.8	10330.4	12833.3	12867.8	16415.5	8754.27	23397.4	23295.6	12769	12328.5	14352.1	0	14090.3	24249.9	9173.14	9429.87	13913.4	10658.7	11821.8	10627.5	14638.2	16650.1	11234.5	8548.29	6117.9
M55T20	1.60606	-0.683527	-2.85139	0.00777279	0.00444618	DOWN	55.1	55	55.1	20.1081	20.0257	20.5464	3.88027e+06	3.40744e+06	2.80554e+06	2.40374e+06	2.58416e+06	2.21119e+06	3.9501e+06	3.82396e+06	2.9235e+06	3.04375e+06	2.51115e+06	2.45247e+06	3.22135e+06	2.5838e+06	5.2072e+06	3.69331e+06	5.27888e+06	4.65406e+06	3.4755e+06	2.91769e+06	2.81192e+06	2.49321e+06	485167	7142.11	3.02053e+06	3.12769e+06	1.41621e+06	768940	1.97004e+06	2.01178e+06	1.5427e+06	1.1231e+06	2.05131e+06	1.76704e+06	530080	469255	3.06667e+06
M47T19	1.60499	0.682565	3.72491	0.000835967	0.000698764	UP	47	47	47	18.5402	18.5305	18.5463	23724.3	33092.2	21726.4	27497.3	29120.9	33122	38048.4	28964.8	41678.9	21912.4	22947.7	22727.6	33713.3	34305.5	9136.2	21602.7	33139.1	30968.2	36004.6	52980.2	18952.5	36487.5	47944.7	0	43274.3	45339.9	52366.6	40593.5	54067.5	43531.1	40625	58271.1	35074.8	40912	32473.9	42023.6	32343.5
M156T20	1.59947	-0.677592	-2.76376	0.00949574	0.00517261	DOWN	156.2	156.2	156.2	20.1081	20.0691	20.1472	555903	473779	404264	343101	323509	277339	601224	650234	497748	390024	419035	327066	455293	381813	712427	530717	765273	633946	496692	376415	362971	345958	85258.7	0	420432	405097	138317	145867	297940	244985	205494	169611	247924	273262	124297	93915	433461
M87T24	1.59602	-0.674478	-3.8685	0.000382286	0.000358699	DOWN	87	87	87	23.7563	23.7462	24.1346	57153	48900.4	81785.6	89346.6	41548.8	42321.6	63569.8	73307.5	45782.7	35955.1	72486.2	66754.8	42718.8	46659.2	33837	42055.6	40273.7	32471.1	65959.5	67182.8	28986.7	27570.3	46023.5	243.871	44644.4	61698.2	35409.9	30172.6	47060.6	34557.6	27331.2	28668.3	56942	7282.89	34316.7	30140	21394.4
M112T20_1	1.59546	0.673973	2.29634	0.0306975	0.013711	UP	112	112	112	19.7431	19.7303	19.9345	12965.1	16849.6	9061.54	8557.46	17437.1	14959.2	16700.5	15157.8	26909.4	25217.7	12163.3	11385.7	27044.6	15732.2	20514.2	18424.3	12976.9	12974	12425.6	15154.9	18967.2	15655.7	29607.3	603.542	2970.44	3932.02	21772.1	24026.8	26124.7	24512.6	40195.2	38822.4	14648.9	15665.1	73662.5	72422.4	14011.8
M67T20	1.59452	-0.673119	-2.85273	0.00752665	0.00433814	DOWN	67.1	67.1	67.1	20.112	20.0848	20.1472	537234	503559	389096	339198	345510	293692	566861	608405	467305	417089	436800	325437	393058	346250	741610	528724	748073	615722	481487	369568	378887	300027	90192.7	2196.14	396675	392773	103294	163025	304968	227025	225602	178545	266143	255035	157711	105721	440381
M79T20	1.5936	-0.672292	-2.80351	0.00844868	0.00473703	DOWN	79.1	79.1	79.1	20.1103	20.0963	20.1472	168024	140720	100677	82477.5	103205	77353.6	159306	187938	146975	128446	102978	102686	133563	125197	230912	152787	205387	188163	145376	117589	95480.4	107315	27308.4	1281.1	115455	126074	38804.5	36208.3	92954.3	66309	69732.8	47514.1	86817.3	92978.2	39601.3	37516.1	122446
M69T18	1.58482	0.664318	2.71592	0.0102776	0.00551096	UP	69.1	69.1	69.1	18.0934	17.4541	18.4415	110260	86127.9	78813.9	85181.7	88212.1	100591	108365	229267	261457	122453	237353	93452.7	93343	246581	97824	256613	218073	97629.3	226780	256069	65344.2	328287	259412	10077.1	143057	148478	313179	305928	293061	155718	252533	234892	566252	592506	210007	200342	373962
M45T20	1.58301	-0.662675	-4.00242	0.000298209	0.000296031	DOWN	45	45	45	20.1042	20.0652	20.1238	1.17061e+06	1.11337e+06	953163	770171	822764	691554	1.42878e+06	1.43535e+06	1.17551e+06	953710	1.00056e+06	785210	1.04097e+06	851252	1.51305e+06	1.15213e+06	1.44588e+06	1.3853e+06	1.08555e+06	937311	882176	786877	290184	4634.77	904433	927856	521405	407375	817263	644830	585913	471227	709823	644168	404250	376951	958142
M132T21	1.58163	-0.661412	-3.98639	0.000373058	0.000351932	DOWN	132.1	132	132.1	20.9989	20.979	21.2522	10172.9	12020	9853.17	11561.3	17286.6	16545.5	10630	11828.9	13561.2	15326.7	13638.8	13559	10946.5	11293.9	14878.1	11920.4	8666.96	12347.8	15810	17364.3	15529.9	17605.1	19207.5	0	2263.69	2608.11	12637.9	12462.8	11637.8	13300.8	12934.1	9882.7	2796.81	2939.8	14071.7	12635.3	6719.13
M107T20	1.58115	-0.660976	-2.84362	0.00748366	0.0043191	DOWN	107.1	107.1	107.1	20.112	19.9302	20.1472	70195.9	52768.1	44784.6	34149.8	34991.1	29625.8	82872.2	76419	56656.3	47229.2	57386.3	42764.3	50686.8	48506.7	89107.1	60801.7	88165.5	74008.8	58041	43050.6	44704.1	46389.9	19339.5	221.916	44201.9	44029.3	14363.3	16966.8	39030.3	28211.9	26595.8	18113.4	35054.8	29589.6	19433.7	19343.1	43956.7
M61T20	1.58048	-0.660362	-3.58539	0.00102597	0.000830231	DOWN	61	61	61	20.1081	20.0652	20.5495	3.178e+06	3.01233e+06	2.57361e+06	2.07456e+06	2.18029e+06	1.82445e+06	3.92938e+06	3.93179e+06	3.17756e+06	2.55748e+06	2.68697e+06	2.10726e+06	2.79158e+06	2.27035e+06	4.14487e+06	3.12226e+06	4.09651e+06	3.76499e+06	2.91406e+06	2.48279e+06	2.35893e+06	2.11115e+06	691518	134.806	2.45769e+06	2.52955e+06	1.32216e+06	1.02804e+06	2.17093e+06	1.70515e+06	1.53116e+06	1.20265e+06	1.9134e+06	1.7207e+06	1.01878e+06	937520	2.59232e+06
M61T11	1.5793	-0.659288	-2.21867	0.0322412	0.0142652	DOWN	61	61	61	10.9119	10.4437	11.4057	133029	74172.4	172775	163026	41412.3	31044.4	100704	146239	36121.5	33076.7	243322	178598	113856	106083	94955.3	79217	161454	160103	32790.3	31352.5	77641.2	26677.2	20884.1	64.9229	63485.6	107978	4418.28	18364.1	37800.3	23773.1	93645.6	79278.5	150996	177719	65973.5	58789	27761.6
M43T18_2	1.57645	0.65668	3.13227	0.00394583	0.0025704	UP	43	43	43	18.4213	18.0904	18.4343	328871	429173	322269	315409	397428	303516	403011	640221	537517	133161	470629	367553	481970	411887	394739	306173	344477	102918	410234	128569	434840	327479	503439	26005.3	921984	910205	634203	436446	852515	166109	868262	901485	430431	571269	629182	715885	261106
M60T35	1.57418	-0.654604	-3.44387	0.00132129	0.00102123	DOWN	60	60	60	34.5646	34.5569	34.5763	73872.6	68251.5	26558.4	63469.5	41055	70617.6	115572	132283	79903.4	60251.4	83770.2	53610.9	72967.6	46864	62692.4	67828.6	62448	45639.1	61502.4	66074.2	25131.4	79020	40077.9	1168.44	19065.9	18960	41692.4	52334	63402.7	58581.9	23692	49595.1	22905	20395.7	48715	47870.7	39756.3
M131T20	1.57131	-0.651972	-2.80484	0.00815192	0.00460942	DOWN	131.1	131.1	131.1	20.1082	20.0848	20.1314	16552.6	17047.8	11941.7	9662.8	9691.37	9393.86	19493.6	20779.4	12773.6	12917.5	9968.67	9820.92	14129.3	12434.8	25095.6	16908.2	23377.6	21956.2	14437	12454.2	11351.7	11785.4	3002.59	0	10909.8	11507.2	4117.75	5147.99	9351.11	9570.61	6174.45	6897.24	9423.77	6046.2	4036.21	3750.43	14800.1
M103T20	1.56709	-0.648091	-2.91742	0.00633593	0.00379143	DOWN	103.1	103.1	103.1	20.1042	20.073	20.1472	106010	100047	82891.7	68606.1	64810.5	54338.9	128189	130807	103670	83642.9	87419.9	66202.1	93417.3	76928.2	141712	99851.3	144659	126550	93834.2	78128.6	73649.3	63742.2	17386.4	0	79544.5	82522.9	36484.2	31010.4	66431.4	55210.5	45919.1	34208.5	59084.5	55048.2	28158.8	26386.9	84613.7
M126T20	1.56579	-0.646895	-2.71789	0.0104224	0.00557391	DOWN	126.1	126.1	126.1	20.1082	19.9383	20.1472	77141.3	67009	58276.3	45964.7	48884.8	35198	96085.6	93657.3	73840.1	59802.1	59756.9	46423.9	61630.4	49907.3	102817	67834.9	103524	93078.7	69136.3	53571.7	54696.3	46592.1	11529.5	458.505	55490.3	57397.1	18544.2	20379.9	47242.8	38576.8	34164.3	26292.7	44160.8	37511	18334.6	20960.2	59291
M43T18_1	1.56443	0.64564	3.35493	0.00253133	0.00176984	UP	43	43	43	17.6441	16.7673	17.8237	213985	239511	192676	263887	265115	308172	273890	235205	328463	332784	156304	182429	262953	276762	172517	178699	248198	327218	309139	383872	229981	227711	131229	40801.8	362003	373605	432159	404117	362497	358791	196912	479723	298197	319671	936116	351279	620703
M98T20	1.55988	-0.641436	-2.8445	0.00767871	0.00440508	DOWN	98.1	98.1	98.1	20.1043	20.0652	20.1472	803983	764214	625521	492332	526559	429437	949013	1.01912e+06	787818	636932	678390	516888	681496	552477	1.09068e+06	780938	1.12574e+06	958170	739455	593998	582748	528472	142361	3015.25	626844	638817	257636	213956	520458	419420	348390	260286	464847	419052	236256	210760	658188
M40T20	1.55986	-0.641414	-2.81685	0.00832931	0.00468575	DOWN	40.1	40.1	40.1	20.1043	20.0652	20.1472	184757	171306	144150	113365	121866	98772	215605	219429	179697	139901	149797	120844	153934	129852	249346	178385	254707	222035	165970	145554	134535	117192	36266.9	762.232	141394	152272	49985.7	49578.1	109878	93838.5	77310.9	58491.6	108637	90544	47973.3	50806.1	145622
M120T32	1.55965	-0.641224	-3.23402	0.00246427	0.00172914	DOWN	120	120	120	31.8467	31.8207	31.8546	61105.9	37445	31461.6	31022.9	32169.4	39307.4	54487.5	62016.3	74535.5	73783	48436.7	37177.7	30173.9	30887.3	37211.9	33176	42066.8	39907.1	52829.3	53760.9	32452.8	31856	40182.6	1820.93	32926.6	40173.7	42366	7824.52	47008.8	9824.43	63340.8	12884	51247.7	9817.15	8442.78	9717.06	39928.2
M46T20	1.55759	-0.639317	-3.36853	0.00192278	0.00139674	DOWN	46.1	46.1	46.1	20.1004	20.0652	20.1433	33714.6	31903.1	26872.1	22434.2	22655.4	19334.5	38980.5	40731.1	33038.5	26965.9	28326	22299.2	29522	25186.3	43882.4	32535	45241.1	40295.9	31145.7	25840.7	25125.1	22264.6	7998.14	0	25832.5	24570.6	13652.8	11253.4	22781	18500.6	16649.1	12633.6	19898.8	18078.1	11231.8	10055	26965.2
M74T20	1.55546	-0.637345	-2.91407	0.00642944	0.00383587	DOWN	74.1	74.1	74.1	20.1042	20.0652	20.1472	640108	601910	496076	407531	413748	349981	782577	750964	621291	493775	503483	406449	550384	442011	858749	582916	879419	749728	576237	481673	456743	408655	114442	0	493066	497664	214219	187549	402516	330012	283758	206537	354880	332025	189505	166462	512027
M84T20	1.55397	-0.635961	-2.90538	0.00660345	0.00391787	DOWN	84.1	84.1	84.1	20.1062	20.0652	20.1472	1.0974e+06	1.01604e+06	844903	691794	726037	597284	1.31614e+06	1.28318e+06	1.02354e+06	846430	863101	702400	946378	765384	1.44766e+06	1.03018e+06	1.51668e+06	1.30448e+06	941333	813696	798698	710954	178105	6585.88	820697	854930	336924	327495	702136	561607	484211	371780	613313	580778	325907	259183	876942
M90T20	1.55359	-0.635605	-2.98333	0.00535058	0.00330636	DOWN	90.1	90.1	90.1	20.1004	20.0652	20.1433	183801	173581	145456	116397	121838	101643	227136	230202	183202	145669	151538	119238	159778	129974	246282	180640	252650	220001	167174	138670	135110	119099	35573.1	0	140197	145104	72430.4	54951.9	119926	94050.2	84200.5	64917.2	107119	96235.3	55244.8	51005.4	147883
M97T20	1.55346	-0.635489	-2.81842	0.00818587	0.00462386	DOWN	97.1	97	97.1	20.1062	19.9345	20.1472	1.01181e+06	954098	790395	630380	667428	549281	1.25149e+06	1.23882e+06	965616	802302	830841	640863	863154	704706	1.37759e+06	963609	1.40065e+06	1.22825e+06	918385	724470	727382	653687	173059	10165.6	770648	817570	298246	293065	657873	528059	443153	339342	565502	539501	279782	283703	831651
M93T20	1.55307	-0.635123	-2.57343	0.0146962	0.00737626	DOWN	93.1	93.1	93.1	20.1121	20.0806	20.1472	101416	89400.9	60953.7	54437.6	48934.1	42540.9	103411	110880	89017	74935.3	66336.2	43634.1	79610.1	60403.7	123644	86129.5	128277	109974	81826.6	63421.9	65333	56987.1	11778.3	755.068	76040.4	74847.6	22376.4	24278.2	62768.9	45901	37299.6	14883.9	52481.8	32827.8	30624.2	28209.2	67986.9
M200T20	1.5507	-0.632921	-2.49496	0.0181922	0.00885618	DOWN	200.2	200.2	200.2	20.1081	20.077	20.1511	824247	723200	628153	509399	526680	432910	666397	972061	642341	624490	601495	424871	686139	567319	1.06311e+06	782506	1.18816e+06	962327	726943	562390	568532	481371	111027	0	597853	612153	220300	197869	456710	413658	292239	225210	464966	347624	200495	186985	667785
M45T9	1.55043	-0.632672	-5.12645	8.79157e-06	2.4004e-05	DOWN	45.1	45	45.1	9.3313	9.24113	9.3577	2.88826e+06	4.20317e+06	3.59335e+06	3.69594e+06	2.63273e+06	3.16704e+06	1.52233e+06	2.34349e+06	2.59475e+06	3.10926e+06	2.38596e+06	2.95488e+06	3.50213e+06	2.83813e+06	3.69317e+06	3.63724e+06	3.03015e+06	3.26784e+06	2.74884e+06	3.17174e+06	3.01074e+06	2.73498e+06	2.47107e+06	2735.43	3.45171e+06	2.4884e+06	1.98415e+06	2.5277e+06	2.84734e+06	2.11051e+06	1.17555e+06	1.22104e+06	1.45135e+06	1.45284e+06	1.87815e+06	1.60055e+06	2.84485e+06
M80T20	1.55038	-0.632625	-2.65715	0.0120833	0.00628172	DOWN	80.1	80	80.1	20.1083	19.4237	20.1472	45949.7	42782.9	36649.6	28282.7	28035.3	21831.9	55426.7	59337.9	43644.7	35185.6	39012.6	27445.1	38370.4	34457.4	59222.3	44104.4	67208.3	52509.4	38563.2	29552.7	33026.3	26065.4	9785.64	138.681	31216	35811.5	14668.1	9854.82	30177.3	21345	18443	7816.72	24665.1	25480.4	12595	9852.44	36794.8
M42T20	1.5501	-0.63236	-2.9756	0.00557645	0.00342033	DOWN	42.1	42.1	42.1	20.1042	20.0691	20.5262	1.24155e+06	1.1494e+06	969800	798411	809152	682115	1.34052e+06	1.41716e+06	1.16244e+06	976205	991626	802994	1.04623e+06	867205	1.61445e+06	1.16185e+06	1.68639e+06	1.46152e+06	1.12493e+06	918210	896678	783650	263088	1074.32	915235	918156	426330	375776	797902	637354	534664	409448	700976	656411	352237	343085	997685
M130T20	1.54912	-0.631447	-2.75191	0.00962496	0.00522465	DOWN	130.1	130.1	130.1	20.1042	20.0691	20.1472	170769	162952	134228	107170	110286	90658.6	215472	217909	164924	134443	141738	109392	145079	117614	227652	167298	242280	207638	156413	124250	122869	105819	31460.1	0	130953	137110	58486.5	46232.5	113949	86597	73400.5	60277.3	97942.3	85986.4	46116	42422.8	137053
M147T21	1.54904	-0.631374	-2.7302	0.00935398	0.00511509	DOWN	147.1	147	147.1	21.0008	20.6255	21.4481	630954	617136	562944	586356	1.03924e+06	1.02597e+06	206564	138445	442222	873213	433313	641098	464637	561458	826254	856092	522246	566165	852313	952330	986234	954713	995264	177.693	210506	51017.2	183288	798614	1.21146e+06	652272	605647	93693.6	270101	280595	462599	635117	290531
M59T20	1.54882	-0.631168	-2.63245	0.0128825	0.00661503	DOWN	59.1	59	59.1	20.112	20.0273	20.1433	187177	174249	166796	125658	147921	88899.4	196180	215780	189870	156093	160410	117407	170664	126151	298347	185051	283471	258579	192747	133036	154373	124948	74950.5	343.724	129833	130781	106313	43702.3	102633	89727.9	65528.9	60961.5	85135.7	104799	40765.9	30872.2	180528
M177T22	1.54875	-0.631103	-3.92493	0.000573404	0.000506234	DOWN	177.1	177.1	177.1	21.8535	21.8483	22.4486	98947	84338	69496.2	70252.5	101577	98794.8	105116	100168	93887.6	91719.8	96092.7	87792.2	109184	102266	117467	96901	85536.3	77207.9	107067	102335	74479.2	86583.8	62456.1	0	10185.6	9633.51	116282	111956	65994.9	62597.1	102363	100276	75117.7	74949.5	59455.1	53037.6	106675
M149T22	1.5481	-0.630494	-3.90459	0.00064634	0.000561621	DOWN	149.1	149.1	149.1	21.8546	21.4398	22.4658	78134.1	68237.6	56879	56555.6	82796.2	78117.2	74794.8	75298.2	72310.4	68410.3	77888.7	70828.3	87320.6	77003.2	88486.8	78263.7	66843.9	65678.8	85302.5	83052.5	65307.2	68047.9	51177.8	445.569	5400.14	7839.55	91109.7	91110.3	51489	48805.2	80976.4	80819.3	61604.8	59341.2	52294.4	44871	83549.1
M117T20	1.54768	-0.630107	-2.63246	0.0129907	0.00665955	DOWN	117.1	117	117.1	20.1081	19.6598	20.1433	22008.3	20559.3	17378	11388.9	15992.4	11855.7	26958.6	29763	20222.1	17654.8	16547.2	14730	21511.2	16948.2	30544.4	22109	32505.9	25949.3	21771.7	15799.9	15540.2	15253.1	4847.56	0	16267.6	14985.1	4943.22	6126.18	16123.7	13369.3	8769.85	7860.27	12643.5	12377.5	4505.21	4729.55	15896.8
M129T20	1.54765	-0.630084	-2.66407	0.0119923	0.00624322	DOWN	129.1	129.1	129.1	20.1082	20.0691	20.5378	896574	861636	696989	537227	601015	486192	1.15201e+06	1.08551e+06	868717	718274	688494	587718	780892	621620	1.24528e+06	912574	1.30516e+06	1.09248e+06	836015	667460	638004	574108	161702	0	705242	720397	263486	257910	606736	462738	398933	299447	513655	451155	231711	218321	748603
M81T20	1.54512	-0.627722	-2.81897	0.00820564	0.00463225	DOWN	81.1	81	81.1	20.1083	20.077	20.5924	607518	586334	483014	360569	411690	349055	741127	728022	585495	488005	471810	405348	517869	444198	843438	607769	862864	730919	556194	473393	437216	397603	117195	5326.7	477833	451554	89826.4	175383	391894	338607	282563	223989	367541	338826	214994	172505	509182
M62T20	1.54484	-0.627455	-3.09042	0.00406013	0.00263039	DOWN	62.1	62.1	62.1	20.1003	20.0652	20.1433	86832.9	83188.7	70396.7	56162	59828.4	49242.3	107262	108329	86472.6	70022.8	73905.3	58442.6	76614	62731.8	115513	84971.9	120201	105755	80491.3	67923.9	65707.9	58373.8	18175.5	0	67784.3	69298.2	36087	27687.2	60302.2	46565.3	40155.4	32397.7	52726.6	47010.8	27298.5	25378.5	71883.6
M89T20	1.54287	-0.625617	-2.96213	0.00565438	0.00345926	DOWN	89.1	89.1	89.1	20.1042	20.0652	20.5414	2.37989e+06	2.2449e+06	1.88673e+06	1.51625e+06	1.59471e+06	1.31755e+06	2.96026e+06	2.95393e+06	2.34445e+06	1.88115e+06	1.97434e+06	1.54181e+06	2.06122e+06	1.66667e+06	3.15655e+06	2.32353e+06	3.2582e+06	2.82932e+06	2.16679e+06	1.79517e+06	1.73487e+06	1.54507e+06	483174	155.939	1.82656e+06	1.88806e+06	930000	722967	1.59004e+06	1.23953e+06	1.09754e+06	853514	1.39429e+06	1.24912e+06	718202	662178	1.93661e+06
M60T20	1.5415	-0.624332	-3.11749	0.00377644	0.00248028	DOWN	60	60	60	20.1042	20.0652	20.1472	3.43287e+06	3.2451e+06	2.76516e+06	2.2327e+06	2.34537e+06	1.96153e+06	4.24319e+06	4.25583e+06	3.42464e+06	2.75303e+06	2.89213e+06	2.26163e+06	3.00932e+06	2.44252e+06	4.49206e+06	3.36965e+06	4.63865e+06	4.07349e+06	3.1405e+06	2.67167e+06	2.54246e+06	2.26958e+06	743637	190.81	2.65331e+06	2.73062e+06	1.41669e+06	1.10302e+06	2.33491e+06	1.82927e+06	1.64396e+06	1.28553e+06	2.05748e+06	1.8465e+06	1.09029e+06	1.00814e+06	2.79389e+06
M153T20	1.5393	-0.622275	-2.59353	0.0141452	0.00714799	DOWN	153.1	153.1	153.1	20.1081	20.0691	20.1511	139758	128734	105242	84968.1	84766.4	71983.5	174499	176239	134956	108101	112456	79995.4	118018	89223.5	189077	135499	190721	167029	123812	96062.9	96949.1	87163.3	22561.3	33.7911	101893	110810	48399.4	36157.6	87961.8	68892.9	60665	46689.9	73927.4	70917.2	35002.2	34416.2	112981
M72T20	1.5362	-0.619366	-3.41485	0.00161265	0.00119559	DOWN	72.1	72.1	72.1	20.1083	20.0652	20.6182	144346	134532	114242	94105.2	96603.8	81198.4	176439	177550	141222	113915	120658	95086.7	125563	101615	181218	139865	195613	170145	130681	110931	104823	94630.4	33594.8	1465.47	111537	116882	61795	49051	97964.3	77633.9	68935.3	56699.1	87778.3	81634.8	51506	47516.2	118189
M175T21	1.5357	-0.618899	-3.11742	0.00362473	0.0023983	DOWN	175.1	175.1	175.1	21.005	20.975	21.4418	15116.6	13078.7	9872.4	12340	27558.6	28036.9	16382.3	14099.6	21997.1	22455.2	21399	20515.8	15503.6	17119.6	22845.3	20493.9	16385.7	15848.3	24349.9	29768.3	23023.6	24956.1	33641.7	132.033	3261.01	2945.62	20277.6	21790.2	18436.6	17718.6	17182.7	15815.5	3540.61	3128.52	20696.6	19126.1	5886.6
M57T20	1.53503	-0.618263	-3.08039	0.00416756	0.00268618	DOWN	57.1	57.1	57.1	20.1042	20.0652	20.1472	2.26924e+06	2.13432e+06	1.81724e+06	1.46162e+06	1.54149e+06	1.28318e+06	2.75557e+06	2.79021e+06	2.24492e+06	1.80471e+06	1.86255e+06	1.48507e+06	1.98907e+06	1.6121e+06	2.96678e+06	2.20825e+06	3.03443e+06	2.68232e+06	2.05205e+06	1.76511e+06	1.67415e+06	1.47927e+06	494180	15112	1.74345e+06	1.7915e+06	915085	742995	1.51311e+06	1.21007e+06	1.08447e+06	863788	1.32863e+06	1.21197e+06	730244	663276	1.84413e+06
M141T18	1.53488	0.618128	1.98688	0.0592938	0.0226038	UP	141.1	141.1	141.1	17.6374	17.6206	17.6563	53183.4	49256.1	47665.1	41255.7	40153.3	29627.5	61991.4	66333.7	55733	42277.2	60775.8	51150.5	29447.3	29148.9	45148.6	36258.9	54428.2	47097	49703.6	33997.4	51020	42086.9	37410.2	3261.83	215620	251380	62845.8	39570.9	64673.6	45384.6	67836.1	43447.9	88399.6	83583.9	86244.1	88927	44977.4
M102T20	1.53468	-0.617938	-2.82885	0.0079243	0.00451187	DOWN	102.1	102.1	102.1	20.1042	19.607	20.1472	975887	914124	763875	612113	639969	530154	1.21507e+06	1.21529e+06	956612	765683	803409	622028	835071	675510	1.30655e+06	946748	1.34963e+06	1.16236e+06	881023	721356	702322	624184	195278	0	744355	776840	370206	289166	650116	498319	444320	344285	564923	507908	285691	266639	790667
M44T14	1.53348	0.616813	4.59748	5.89159e-05	8.46517e-05	UP	44	44	44	14.0718	13.7703	14.0931	35799.1	25304.1	18721.5	27784.1	23667.8	36449.9	25520.2	30780	26145.4	26022.2	24423.3	33525.7	24358.2	23144.2	29966.4	28306	20263.7	20724.6	54795	27973.8	25146	26153.8	45644.3	27542.5	22247.3	42582.2	36837.7	46035.6	42541.7	20974.5	54301.2	64367.3	48815.7	50109.1	41903.5	51720.8	42950.3
M117T26	1.53266	0.616039	2.51148	0.0189633	0.00917301	UP	117	117	117	25.5942	25.5875	25.6012	58166.3	41037.6	26654.9	32910.6	50190.5	57971.6	64047.9	61582	49629.4	49838.4	38572	39773.5	27015.4	21784.3	38106	40346.1	44401.2	42098.9	48646.9	38061.6	34250.3	25064.2	62212.2	1925.56	167574	177141	50466.4	39486.8	39876	48614.3	56012.4	60931	73103.9	78013.6	82242.7	98927.4	42649.4
M201T20	1.53226	-0.615661	-2.15745	0.0387151	0.0164801	DOWN	201.2	201.2	201.2	20.1082	20.0691	20.1511	141927	130714	102048	76814.4	81728.8	65993.3	179483	177403	128773	100012	108727	78731.6	110211	91062.9	191600	126734	213138	168971	118951	85083.3	94828.5	81064.8	18912.3	0	103805	103427	34510.3	28407.4	85311.8	63025	50887.7	38694.1	72783	65858.1	31054.4	27677.1	111225
M83T20	1.53203	-0.615443	-2.81924	0.00811912	0.00459545	DOWN	83.1	83.1	83.1	20.1043	20.0652	20.1472	1.45396e+06	1.36068e+06	1.1167e+06	901334	962446	780068	1.78888e+06	1.81017e+06	1.39733e+06	1.12202e+06	1.18188e+06	924515	1.24816e+06	1.0148e+06	1.9372e+06	1.41983e+06	2.00166e+06	1.73221e+06	1.30905e+06	1.08461e+06	1.04216e+06	929136	284473	7413.55	1.11072e+06	1.13567e+06	515486	444008	968174	746168	651794	506471	837122	773249	445388	410623	1.17781e+06
M155T20	1.53125	-0.614714	-2.68763	0.011258	0.00593075	DOWN	155.1	155.1	155.1	20.1081	20.0691	20.1472	5.12605e+06	4.80071e+06	3.93893e+06	3.15243e+06	3.31459e+06	2.70903e+06	6.42997e+06	6.44301e+06	4.99235e+06	3.98871e+06	4.16398e+06	3.21427e+06	4.3531e+06	3.50188e+06	6.90924e+06	4.94549e+06	7.16916e+06	6.08992e+06	4.60223e+06	3.67179e+06	3.62634e+06	3.21447e+06	955520	1263.76	3.90273e+06	4.08792e+06	1.87335e+06	1.45407e+06	3.34597e+06	2.5642e+06	2.26142e+06	1.75114e+06	2.91669e+06	2.61896e+06	1.44917e+06	1.34774e+06	4.14273e+06
M112T20_2	1.53058	-0.614082	-2.74891	0.0096602	0.00523878	DOWN	112.1	112.1	112.1	20.1043	20.0652	20.1472	173423	163394	137314	108920	114515	91428.9	221854	220916	171464	135807	141967	108708	152119	121096	234028	169462	239428	209238	156939	126060	123298	111460	29480.1	1345.95	131805	139274	62378.8	48976.5	115050	89951.2	76836.8	62786.5	100742	92122.3	54191.9	50858.1	141526
M74T22	1.52932	-0.61289	-5.70933	1.24364e-06	4.67179e-06	DOWN	74.1	74.1	74.1	21.6819	21.4357	22.1039	14856.8	10129.6	12201.6	9433.68	16742.9	10308	15661.2	10622.8	11571.7	11591.8	14436	12257.1	13392.3	14963.1	16214.5	12947.9	15779.6	12954.5	13873.8	11827.6	12205.1	8969.3	8081.83	44.1037	9888.79	6872.65	12748.4	9281.25	8067.75	9978.86	4850.75	6590.46	9945.92	6370.91	10132.6	12770.6	12141.9
M157T20	1.52878	-0.612381	-2.6528	0.0122678	0.00635938	DOWN	157.1	157.1	157.1	20.1081	20.0691	20.1511	4.69572e+06	4.39166e+06	3.58099e+06	2.87877e+06	3.02127e+06	2.47456e+06	5.87682e+06	5.88519e+06	4.55458e+06	3.63944e+06	3.79711e+06	2.93097e+06	3.96322e+06	3.1985e+06	6.33619e+06	4.51688e+06	6.57205e+06	5.57765e+06	4.20332e+06	3.33949e+06	3.31721e+06	2.93372e+06	867717	168.946	3.56361e+06	3.74927e+06	1.69504e+06	1.32005e+06	3.04748e+06	2.33295e+06	2.06166e+06	1.59335e+06	2.66341e+06	2.38613e+06	1.31588e+06	1.22257e+06	3.7905e+06
M69T20	1.52808	-0.611724	-2.89843	0.00664917	0.00393926	DOWN	69.1	69.1	69.1	20.1042	20.0652	20.1472	2.49245e+06	2.34785e+06	1.97289e+06	1.58508e+06	1.66235e+06	1.37496e+06	3.08802e+06	3.0948e+06	2.45182e+06	1.97357e+06	2.04701e+06	1.60058e+06	2.15679e+06	1.737e+06	3.2942e+06	2.42763e+06	3.41445e+06	2.96354e+06	2.25863e+06	1.87806e+06	1.81956e+06	1.61658e+06	524500	10223.7	1.90613e+06	1.97864e+06	946164	774003	1.67326e+06	1.30156e+06	1.15673e+06	923584	1.46369e+06	1.31826e+06	778206	729638	2.02604e+06
M85T20	1.52728	-0.610968	-2.90195	0.00656308	0.00389892	DOWN	85.1	85.1	85.1	20.1081	20.0652	20.5299	1.17737e+06	1.10038e+06	929292	740343	775404	644555	1.46945e+06	1.46779e+06	1.15178e+06	922041	976097	760118	1.01768e+06	824905	1.55667e+06	1.13659e+06	1.61308e+06	1.38968e+06	1.05632e+06	880349	856741	761398	242471	14961.9	896506	927841	460201	365483	790918	613552	538988	434086	691314	622923	377312	339228	958339
M111T20	1.52675	-0.610461	-2.69676	0.0110481	0.00584214	DOWN	111.1	111.1	111.1	20.1081	20.0691	20.1472	331520	318263	271983	208861	219426	181944	424602	415416	334962	264658	279424	215253	299168	239949	461182	329566	483161	401293	308836	250589	248062	209831	56178.3	4952.35	265878	272133	118999	102696	218890	172649	145102	116170	199550	182198	105762	89684.8	279796
M45T7	1.52584	-0.609602	-4.56237	6.68241e-05	9.0493e-05	DOWN	45	45	45	7.15114	7.14045	7.43413	252933	233896	417877	357039	188914	184055	264529	244250	169243	146773	351846	339929	315529	295526	207550	219796	226685	244577	153525	182734	173961	169702	147533	10104.1	176645	225673	191225	176353	163118	147785	166255	163339	203649	191484	130047	123123	139790
M135T20	1.52542	-0.609204	-2.5812	0.0145358	0.00731011	DOWN	135.1	135.1	135.1	20.1081	20.0691	20.1472	125043	116167	93755.9	75637.7	78310.9	61060.9	145590	153916	119556	95489	98772.1	75858.9	101558	83946.2	166859	119254	177626	147594	110663	85691	85871.4	72092.6	23052.3	515.61	93016.4	93392.5	44777.5	31474.6	80681.8	59345	53904.9	44040.4	69838.9	60636.7	33778.9	31886.4	103120
M171T20	1.52452	-0.608353	-2.59089	0.0142489	0.00719122	DOWN	171.1	171.1	171.1	20.112	20.0691	20.547	818833	768159	626510	498577	522527	426281	1.0303e+06	1.0266e+06	793921	632335	650857	510776	689418	559000	1.1064e+06	789895	1.15404e+06	976552	733727	577483	575690	499422	147641	0	621577	656260	293788	224543	529479	407658	354684	276048	461991	415235	226948	210608	661208
M47T18	1.52413	0.607986	2.6617	0.0124464	0.00643416	UP	47	47	47	17.6656	17.6482	17.6857	69027.2	71521.3	51751	90215.9	92731	130226	92014.5	72760.9	121251	69464.6	46243.9	56713.5	102458	113050	27670.8	57791.3	89738.9	133141	97266.2	159798	45204.7	76855.5	92433.7	0	115155	79062.9	188109	172778	120418	116824	125248	180310	92421.6	76747.9	59970.6	89242.6	80718.9
M68T20	1.52277	-0.606698	-2.75254	0.00956766	0.00520162	DOWN	68.1	68.1	68.1	20.1043	20.0652	20.5179	434836	399058	337869	266964	283341	231808	525796	539347	419352	326706	344696	272180	363520	296484	577562	420500	602813	514552	392701	321317	309167	273601	89219.1	766.792	328002	342021	162272	134956	272935	211371	200535	153030	251580	230648	133069	124227	354528
M192T22	1.52193	-0.605904	-3.53714	0.00148547	0.00112021	DOWN	192.1	192.1	192.1	21.8532	21.8497	21.8608	165388	170299	107541	118671	193404	173432	216807	193168	197755	156297	172144	152776	225305	190924	201432	187266	168574	149583	188199	195344	154909	172932	118856	0	16001	20231.8	236506	220970	128490	106244	199595	189037	129082	148986	109017	111380	204027
M48T18	1.52136	0.605361	2.30659	0.028075	0.012745	UP	48.1	48.1	48.1	17.6618	17.6419	17.6811	1248.04	2241.6	1264.41	2228.37	2874.68	2771.77	2291.84	1439.84	3071.77	1524.88	1012	1245.09	1794.36	2759.12	331.329	1471.75	1737.23	3348.93	2815.44	3703.42	989.535	1976.02	2103.99	0	2995.81	2229.55	4032.3	3939.14	2811.56	2965.68	3022.68	4396.83	1491.68	1913.64	1053.37	2407.35	1878.18
M174T21	1.52061	-0.60465	-3.83469	0.000602332	0.000528413	DOWN	174.1	174.1	174.1	21.0025	20.9789	21.0168	104878	118133	104438	104277	164671	167009	116156	110141	127095	148171	118291	125031	106245	115520	161977	143536	111906	114423	147715	172533	158067	151450	181808	0	27912.9	19846.4	134559	133077	107521	115073	118680	118586	29391.2	28633	124656	127150	53957.6
M143T20	1.51845	-0.6026	-2.64939	0.0123555	0.00639616	DOWN	143.1	143.1	143.1	20.1062	20.0691	20.5459	1.42515e+06	1.34155e+06	1.08988e+06	870995	922586	750797	1.77417e+06	1.77826e+06	1.38151e+06	1.1109e+06	1.15049e+06	892486	1.20962e+06	970891	1.91772e+06	1.37632e+06	1.99177e+06	1.69362e+06	1.27665e+06	1.01755e+06	1.00993e+06	893068	273639	0	1.07638e+06	1.12797e+06	515183	407794	932629	719249	629715	491379	837338	754483	410329	378440	1.16844e+06
M71T20	1.51774	-0.601922	-2.94198	0.00592995	0.00359534	DOWN	71.1	71.1	71.1	20.1042	20.0652	20.1472	2.12069e+06	1.99109e+06	1.69131e+06	1.35606e+06	1.42462e+06	1.18634e+06	2.63323e+06	2.64651e+06	2.09179e+06	1.67761e+06	1.76445e+06	1.38293e+06	1.84677e+06	1.49417e+06	2.79725e+06	2.0672e+06	2.88137e+06	2.50822e+06	1.9111e+06	1.61838e+06	1.55862e+06	1.38317e+06	465434	14934.5	1.63436e+06	1.69567e+06	848699	681086	1.43932e+06	1.12867e+06	991640	804996	1.26412e+06	1.15331e+06	700703	641904	1.73014e+06
M173T20	1.51766	-0.601848	-2.94198	0.00560446	0.00343435	DOWN	173.1	173.1	173.1	20.1081	20.0807	20.1314	162359	126680	133732	87081.2	113108	82170.4	223143	224951	187223	131315	147429	108510	141823	96025.7	185312	149520	201451	206875	133608	95785.6	118672	107958	23246.4	0	129599	147806	66376.1	51550.8	113514	85974.3	78987	66258.7	101495	89312.9	55414.8	50868.8	145073
M110T20	1.51662	-0.600858	-2.84088	0.00760289	0.00437178	DOWN	110.1	110.1	110.1	20.1042	19.4518	20.1472	132099	129323	101759	83794.8	84722.6	71462.4	169773	169288	130977	106612	112627	87574	115418	94291.5	182419	132788	182156	160272	122539	99786.7	98155.5	87703.2	26996.5	1489.59	101644	105334	48058.9	40136.3	87255	73561.8	59705.7	55939.9	80220.4	77018.5	45028.1	44989.9	108683
M86T20_2	1.51521	-0.599516	-2.9724	0.00539256	0.00332767	DOWN	86.1	86.1	86.1	20.1042	20.0652	20.1316	127997	122491	102036	80953	81896.8	67451.5	161251	154671	127741	98313.7	105567	82271.5	112013	91822.2	164788	126760	176377	148574	115338	90902.1	92257.3	82841.9	27236.6	985.017	98017.3	102747	52027.5	40009.7	85682	70371.2	59922	47302.5	75843.8	71551.9	45087.7	38417.2	103447
M113T20	1.51491	-0.599229	-2.83719	0.00740638	0.00428476	DOWN	113.1	113	113.1	20.1081	19.9139	20.1354	35511.6	24163.3	24314.9	19515.6	18280.3	17218.2	39604.8	42297.1	32686.9	24182.8	27876.2	19468.2	29181.7	20353.2	42105.1	28889.9	44623	36715.8	26430.6	24457.8	24699.7	16688.2	5962.83	1606.99	22940.2	24671.1	12381.3	10059.6	21460.2	18367.4	13387.3	11936.9	17825.5	17850.7	12403.1	10957.2	25898.1
M104T18	1.51445	0.598792	2.12403	0.0443776	0.0182842	UP	104	104	104.1	17.8159	17.1441	17.8291	16249.9	17220.7	13925.1	11402	21181.7	19419.6	21258.9	23435.4	24241.1	9971.41	15111.5	14816.9	22750	20769.7	16988.3	19180.7	13625	16750	14018.6	21805.3	31234.1	24657	59814.5	0	16860.3	16653.5	26052.5	16986.1	20478.7	16655.8	32120.6	38044.9	15547.1	14836.2	74564	70029.2	23802.4
M144T20	1.51393	-0.598299	-2.60302	0.0138195	0.0070116	DOWN	144.1	144.1	144.1	20.112	20.0652	20.5494	177661	169152	126768	107662	115470	93397.7	225849	224009	174219	128709	146509	112150	151330	123629	243366	173812	245634	203716	158690	125172	127549	113943	33245.7	0	134984	143184	61088.8	47445	118056	90704.5	80199.1	57269.1	104186	94825.3	51627.8	45806.7	144968
M75T18	1.51297	0.597386	2.67932	0.0125482	0.00647662	UP	75	75	75	17.6587	17.6451	17.6849	38066.7	66668.1	44673.8	72975.3	68829.9	85377.2	71682.3	53565.3	92547	54443.5	41127.9	48709.2	69920.5	68534.6	25405.3	41907	58145.2	74627.6	79531.2	93958.7	37220.2	65917.1	77087.3	38.4911	64934.4	74825.1	136467	102410	95648.9	93362.8	100275	131538	59043.6	72832.2	44247.4	65522.9	61441.8
M56T20_2	1.51243	-0.596871	-2.88051	0.00695944	0.00408282	DOWN	56.1	56.1	56.1	20.1179	20.0652	20.5575	1.00211e+06	935976	786550	637616	671171	558437	1.22659e+06	1.23892e+06	985562	793950	828481	648716	866254	705093	1.32786e+06	976653	1.36597e+06	1.18693e+06	905708	765771	732510	654845	225640	5334.4	766700	795491	412879	320871	682349	532751	470200	371262	587728	535633	326941	298341	816182
M131T21	1.51015	-0.594689	-4.12042	0.000278434	0.000281492	DOWN	131.1	131.1	131.1	20.9984	20.975	21.0131	212739	216636	195221	193882	304293	312871	210535	232035	254257	281172	252833	246738	212473	219871	298084	270232	201960	230050	284198	317254	279232	295545	328455	146.342	54154.2	55691.1	227076	243422	226556	217368	228984	216597	69738.5	70117.9	238901	243763	121365
M86T20_1	1.50711	-0.59178	-4.40931	7.71786e-05	0.000100186	DOWN	86	86	86	19.8792	19.8639	19.8996	64002.4	84601.9	81956.7	95099.1	90134.9	90407.7	70456.6	80209.4	77290	65459.1	68859.1	70217.1	61110.3	61746.7	57762.2	74306	41132.3	51845	79968.1	103213	49923.5	57060.1	100520	1328.83	25491.6	25958.9	73552.7	61110.6	64135.9	55949.3	50855.8	58265.7	59134.1	55795.7	56567.4	56726	30735.3
M72T7	1.5065	-0.591202	-3.45562	0.00137767	0.00105577	DOWN	72.1	72.1	72.1	7.13438	7.11593	7.14937	155523	134535	247009	246574	121739	125781	123688	134015	109712	80970.2	217109	214284	184711	172908	113396	106540	125419	121401	68764.5	64066.7	108115	112148	89507.9	354.981	156462	145298	142886	146262	113566	103172	109682	107841	101754	89520.8	49381.2	42701.3	87993.4
M146T21	1.50603	-0.590755	-3.38217	0.00168729	0.00124475	DOWN	146.1	146.1	146.1	21.0056	20.5359	21.4481	50375.9	53490.3	45295	50953	75681.7	74111.9	51136.3	49506.6	59191.3	61769.1	55280.4	56847.7	4745.75	54472.6	69165.8	66335.6	47852.4	54951	66912.8	81245.8	71048.7	68459.3	71504	0	11427.3	12469.4	53299.5	54835.5	54572	55935.3	56830.9	55381.9	17219.2	16118.5	57072.6	63203.8	7132.95
M44T20	1.5054	-0.590148	-3.10427	0.00388994	0.00254083	DOWN	44.1	44.1	44.1	20.114	20.0652	20.5456	180149	170835	148525	118341	124980	103612	218775	221818	180253	145922	151511	119547	156874	129891	233714	176265	241131	213595	166581	145913	134594	117082	44548	2613.71	140079	143535	78646.8	65590.1	125018	99134.2	90025	74435.3	109008	101849	61352.5	57757.2	146366
[truncated: 7 more columns]

## Sheet: supplementary table 2
Free Volatiles
Table S2 showing metabolic feature differences for free volatiles between Norton and Cabernet Sauvignon.
Features	fold	fold	tstat	pvalue	qvalue	updown	mzmed	mzmin	mzmax	rtmed	compounds	rtmin	rtmax	npeaks	cab free	Norton free	maxint	mean1	sd1	mean2	sd2	13f_MA	14f_MA	15f_MA	16f_MA	17f_MA	18f_MA	19f_correct	1f_MA	20f_correct_MA	21f_MA	22f_MA	23f_MA	24f_MA	2f_MA	3f_MA	40f_MA	41f_MA	42f_MA	4f_MA	5f_MA	6f_MA	10f_MA	11f_MA	12f_MA	25f_MA	26f_MA	27f_MA	28f_MA
M74T6	1.94735	2.94735	1.47843	0.153976	0.0411953	UP	74	74	74	6.29973		6.29148	6.72683	23	7	15	55176	12297.3	6242.03	23947.2	35566.6	19388.5	10729.1	6112.01	7292.11	10558	8646.08	14603.1	29638.5	13613.1	19538.7	21874	6206.37	5492.44	12521.1	14368	8057.56	6800.74	4876.93	14127.2	11530	12270.1	24067.1	25634.8	24488.7	11487.3	177635	12106.6	16571.5
M57T9	2.05656	3.05656	1.16865	0.251715	0.0648424	UP	57	56.9	57	9.31819		9.27378	9.86948	30	8	14	899648	127255	243463	261708	467640	52986.8	45042.5	390850	226212	834599	32401.2	20124.9	13795.3	19972.5	18475.1	17294.9	46846.6	53187.3	21941.5	10889	11808.1	13730.2	19361.6	20694.5	781251	20895.8	17269.1	1.39417e+06	15174.5	1.72352e+06	537628	62487.5	22717.2
M83T10	1.85603	2.85603	2.32433	0.0285834	0.00899879	UP	83	82.9	83	9.85461	2-hexenal,(E)-	9.09363	10.197	58	19	18	1584640	654229	365105	1.21427e+06	1.04205e+06	1.0706e+06	520284	619624	339177	573326	472959	884038	1.27868e+06	580404	1.62325e+06	1.0263e+06	244485	234129	584020	928202	432216	321035	237661	739211	563614	465591	1.13486e+06	838335	1.34101e+06	3.91404e+06	297648	557737	4.22416e+06
M119T11	2.33302	3.33302	1.64464	0.113955	0.03149	UP	119	118.9	119	10.8409	p-cymene	10.816	11.1264	20	12	8	185024	39040.1	35125.4	91081.4	140688	21315	40789.3	36247.7	39973.8	33159.6	26511.3	22065.9	16617.6	24864.9	52467.8	94921.7	68654.8	164328	6472.24	25191.2	14252.9	21401.2	46865.6	18702.3	15779.3	29260.3	7945.07	11355.4	10495.4	14507.6	34593.8	473183	9843.71
M75T11	1.54022	2.54022	-2.39108	0.0216873	0.00703495	DOWN	74.9	74.9	74.9	11.1262	Terpinolene	11.103	11.1461	28	16	12	104856	129739	57291.4	84234.4	65753.7	102951	97099.7	186232	83434.9	153932	127088	75826.8	34550.8	129456	192683	52101.6	117855	75014.6	115348	218530	81048.6	181231	184135	254527	155198	106281	112060	116987	166524	68006.1	228800	58556.7	50666
M77T11	1.54469	2.54469	-2.71665	0.00978815	0.00354216	DOWN	76.9	76.9	76.9	11.1267	Terpinolene	11.103	11.1586	41	21	20	185216	259739	99757.6	168150	117975	220836	191005	356753	218933	310652	245317	153192	93392.9	253055	358815	138238	257582	166736	229205	420356	163559	326260	339583	495205	304747	211104	218075	209758	336029	136951	413033	122049	107794
M61T11	1.70793	2.70793	-3.02197	0.00437705	0.00180927	DOWN	60.9	60.9	60.9	11.1282	Terpinolene	10.9234	11.1493	20	12	8	18344	23283.7	9962.18	13632.7	10720.8	18279.3	15740.4	31225.7	18094	26955.3	18137.5	12730.7	5454.03	20337.8	29849.8	8817.9	27342.4	38656	17499.6	33057.6	15007.9	28410.8	31684.4	44999.8	28993.7	17683.3	17165.4	19820.3	31775.5	10810.2	32851.8	8648.25	9157.53
M105T11	1.54839	2.54839	-2.6473	0.0116256	0.00411356	DOWN	104.9	104.9	104.9	11.1295	Terpinolene	11.103	11.1967	41	21	20	233024	313673	125913	202580	145354	262639	235585	414627	248430	392051	301370	178201	104485	275554	441729	161862	312328	196071	284331	513201	202451	389814	422876	620288	369457	259776	274074	264055	416084	148643	482280	142881	115008
M102T12	18.714	19.714	3.64183	0.00160279	0.0007504	UP	102	102	102	12.044		12.0171	12.0641	15	1	14	26632	799.669	1232.64	14965	17781.8	5370.86	323.972	2122.22	2660.29	304.762	378.988	181.923	1085.6	67.0491	353.782	189.478	92.0239	197.413	372.54	379.442	369.712	270.177	328.973	584.429	648.431	510.99	3694.91	4438.68	3972.87	10088.1	81846.6	19944	11465.6
M205T13	1.6144	2.6144	-2.48709	0.0203805	0.00666249	DOWN	204.9	204.9	204.9	12.6142		12.6027	12.6249	17	11	6	15523	12628.2	8484.64	7822.25	2534.86	9173.29	7358.51	24862.4	10836.6	12294.2	11998	5068.99	10025.6	12154.8	34636.5	7335.72	27873.9	7020.42	11974.5	9981.13	3016.49	4976.09	5966.02	26642.5	11951.6	10045.2	8689.44	11524.8	13197.4	5227.82	8055.21	7015.25	9386.98
M193T13	1.50838	2.50838	-2.76495	0.0107908	0.00385651	DOWN	192.9	192.9	192.9	12.6142		12.6027	12.6215	33	18	15	59224	55588.7	29623.9	36853.2	9308	48598	44901.5	104554	42558.2	51116	53727.3	30932.5	38423.9	49378.9	129116	34686.7	102077	31445.2	52175.9	47106.6	28533.5	30130.6	30577.3	110995	60172	46155.2	49388.2	53644.6	42332.7	30217.6	33131.4	25217.2	45438.1
M148T13	1.58459	2.58459	-2.63274	0.0143629	0.00492479	DOWN	148	148	148	12.6144		12.6027	12.6212	23	13	10	86512	73544.1	44586	46412.1	15569.7	68568.3	60339.1	131845	49822.3	64120.2	72394.1	35335.9	62772.4	65079.2	198074	40925.2	149890	38953.8	63422.5	56367.2	36441.9	37073.6	28299.9	143910	78776	62015.8	64190.9	61131.5	73571	32638.1	34302.8	36018.9	50575.1
M249T13	1.65317	2.65317	-2.55388	0.0166272	0.00558073	DOWN	248.9	248.9	248.9	12.6161		12.6027	12.6253	28	17	11	42856	36735.5	24328.7	22013.7	10292.3	33520.8	26861	76337.9	27997.7	32976.6	32723.7	18145.5	32090	32090.4	96390.7	23719.2	78809.8	21208.7	34654.1	25381.1	0	18479.3	15967.5	77207.1	36581.5	30302.9	24186.6	27705.6	35579.3	20518	19358.7	0	30848.1
M159T13	64.2213	65.2213	5.57419	1.86222e-05	1.92574e-05	UP	159	159	159	12.6746		12.6287	12.7352	20	0	20	79064	1034.56	721.352	75999.9	61625.2	1338.75	2254	839.452	1621.35	2101.6	274.095	712.297	2352.78	261.25	1216.94	1396.2	1591.86	1693.2	782.172	785.808	1067.93	55.1477	0	645.469	670.325	65.1089	177340	189688	130699	55365.9	5689.75	17521.3	37796.3
M68T13	3.82156	4.82156	4.72939	0.000104541	8.04789e-05	UP	68	68	68	12.6808		12.2881	12.6961	17	5	12	49952	16897.2	9457.96	64573.8	45218	29995	31412.8	15037.9	11087.3	15615	29263.8	2986.81	16601.4	3485.21	4364.74	3473.27	13491.6	18506	14223	37320	20535.5	20897	17102.9	19080.7	11581.1	18780.9	61411.4	37967	53189.7	1919.71	3850.08	4089.36	2768.92
M83T13	3.60498	4.60498	5.09949	4.59546e-05	4.12104e-05	UP	83	83	83	12.6822		12.6735	12.6961	14	2	12	37760	14272.2	5762.24	51451.2	32909.6	15819.7	12120.7	14596.1	12444	14775.6	12628.8	3256.51	17724.2	4216.76	14895.1	8287.66	16046	9428.45	11860.1	16790.6	15671.9	19751.6	18148.8	22570.5	10014	28669.9	50462.3	46297.3	50431.3	5867.68	4099.51	7051.95	6702.18
M93T13	5.23637	6.23637	4.9498	7.29673e-05	6.02714e-05	UP	93	92.9	93	12.6841		11.7665	13.1236	19	3	12	51520	11467	4523.53	60045.2	44746.1	9347.3	15778	10884.7	13068	14917.7	10516.6	3745.05	13217.4	5024.8	3425.76	4021.98	11791.8	9031.46	11429.3	12601.6	16500.6	12144	16471.5	18069.1	10728.7	18090.5	56631.4	47128.2	17841.9	1633.12	3230.26	1941.88	3203.15
M108T13	4.20568	5.20568	5.11954	4.52758e-05	4.07067e-05	UP	108	108	108	12.6846		12.6685	12.6996	30	15	15	165696	55394.6	24727.6	232972	157017	70689.9	73920.3	47270.5	61664.2	68823.3	63333.5	11387.5	73848.6	9815.48	13349.3	21878.7	44939.1	41426.6	56918.1	56445.4	74525	70455.7	71742.4	71011.6	53063.3	106778	249917	210257	245908	7770.38	14422.2	6359.73	11883.1
M109T13	4.35242	5.35242	5.27872	3.26407e-05	3.08314e-05	UP	109	109	109	12.6848		12.6735	12.6961	12	0	12	16528	4996.69	1890.34	21747.7	14418.5	5271.99	6091.46	4663.82	5249.82	5906.9	4683.78	1463.14	7652.03	1576.96	1994.64	2513.24	4977.25	3690.87	4435.36	6124	6059.64	5908.83	6417.87	7548.41	4732.81	7967.67	25468.4	17139.1	26866.9	1204.54	2081.97	848.386	1782.83
M126T13	5.12717	6.12717	5.22571	3.66039e-05	3.40348e-05	UP	126	126	126	12.6855		12.6735	12.6961	13	1	12	27328	6741.49	3297.61	34564.8	24175.2	9879.13	7981.16	6025.6	8309.67	6807.25	7400.34	1523.66	9322.08	1737.38	3052.21	1313.01	4931.58	4328.62	6381.1	6096.2	10391.5	8876.31	9854.15	9889.79	3959.61	13510.8	33718.7	22599.9	38757.9	329.897	2348.13	937.35	1730.31
M67T13	3.02762	4.02762	5.14754	1.55719e-05	1.65945e-05	UP	67	67	67	12.6888		12.2763	13.0672	22	8	13	63336	31363.9	25842.5	94957.8	50372	21630.1	21420.9	14707.5	23999.7	14458.5	18011.3	71663.4	18282.3	100451	6447.53	95903.1	23735.4	17419.4	16486.4	25613.2	32109.1	24936.1	21224.3	38993.3	14711.7	36436.1	77365.7	64618.6	71309.1	3089.65	116395	52225.2	3554.69
M139T13	8.9365	9.9365	5.79639	9.34211e-06	1.06845e-05	UP	139	139	139	12.9881		12.9573	13.3897	18	3	14	31880	2698.78	2684.43	24117.6	16719.4	2969.42	765.273	4005.46	7166.39	1987.49	1724.92	3156.48	713.184	3791.11	3002.99	3820.47	9842.24	7960.62	1093.99	609.947	506.597	691.724	376.062	1104.82	792.757	592.385	22306.5	17247.7	13520.1	7256.88	16106.5	10052.1	5757.22
M72T14	1.66694	2.66694	-2.08828	0.0485746	0.0146852	DOWN	72	72	72	14.1304		14.067	14.7782	32	13	12	57728	41912	35919.9	25143.1	7991.68	28686.8	30186.9	8266.28	31142.7	38861.6	29880.8	97643.2	41069.2	128652	28677	141642	26344.4	35488.7	42279.8	43703.3	7822.1	11786	26174.1	29916.3	32353.8	19574.5	42391.7	26185	26909.2	19403.9	27496	29649.3	27933
M86T15	2.50235	3.50235	0.935142	0.36085	0.0904139	UP	86	86	86	14.7622		14.7243	15.0392	25	14	11	182336	15766.4	3448.43	39453	116023	18043.7	20139.1	18878.5	18585	17029.6	13497.8	14558	8150.89	18808.7	15820.6	21960.9	17863.4	18300.6	10503.6	10860.9	15081.1	15969	12342.3	16721.9	13881.6	14096.7	14093.5	15228.1	9693.74	14781.6	25186.3	15392.8	545596
M159T15_2	70.6604	71.6604	4.49842	0.000219541	0.00015054	UP	159	159	159	14.815		14.7668	14.8484	16	0	16	44616	278.763	254.277	40732.7	41210	342.663	305.22	211.845	176.598	392.992	59.3866	165.828	269.709	660.709	330.132	1139.78	281.715	431.307	286.069	338.801	0	49.583	0	161.841	42.2713	207.568	117782	121045	82528.3	24139.3	7596.86	7091.49	20521
M89T15	2.31207	3.31207	3.61221	0.00114436	0.000561432	UP	89	88.9	89	15.1522	Ethyl octanoate	15.1034	15.6617	29	12	17	32448	12762.4	9185.88	29507.6	19154.8	19673.8	22121.6	32596.8	32698.8	23962.5	25345.3	6593.03	9516.79	4440.63	8328.79	6281.79	5322.62	7293.34	10850.9	9964.31	6056.5	4921.04	7366.23	7872.37	7015.35	9787.64	23779.7	27649	20021.7	5718.79	77837.7	19019.5	36168.7
M60T15	2.3299	3.3299	3.75223	0.000793225	0.000412694	UP	59.9	59.9	60	15.1523	Ethyl octanoate	14.571	15.3143	38	15	20	90896	35500.6	24754.9	82712.7	52075.4	57424.2	49651.6	94836.5	76789	59442.6	85489	17816.6	22798.7	16225.7	18941.5	22162.2	21112.5	22428.1	28353.1	27860.5	15275.9	14366.8	21686.5	21762.6	20107	30981.6	61854.7	69088.5	62565.1	24395.6	219441	51769.9	99661.9
M127T15	2.16389	3.16389	3.49392	0.00148082	0.000699659	UP	127	126.9	127	15.1524	Ethyl octanoate	14.7668	15.423	38	15	21	130960	55882.1	39997.7	120923	75348.4	82344.1	85930.3	149971	135786	98872.1	124440	26609.8	38429.4	23733.1	43447	29283.5	33016.3	28785.5	37301.4	37158.1	24855.5	18837.5	34371.9	42684	34115.3	43554.3	96850.9	101420	93767.2	35466.4	313219	71552.8	147464
M151T15	56.9433	57.9433	-10.5668	1.23308e-09	5.03693e-09	DOWN	151	151	151	15.3917		15.368	15.4039	19	19	0	34584	48796	20786.6	856.923	383.427	48526.6	50064.5	29011.9	29649.2	36664	48431.3	18104.1	71625.6	15791	30622.2	52840.8	76613.8	100668	31797.1	70082.1	51957.3	65387.7	56729	45642.6	35722.4	58785.2	652.445	819.022	994.743	1623.65	1328.89	510.044	648.927
M159T15_1	49.3312	50.3312	5.73701	1.29204e-05	1.41442e-05	UP	159	159	159	15.4008		15.3642	15.4309	26	5	21	486080	10159.9	7309.72	501202	392164	11951.3	20940.7	7247.88	9398.04	17813.1	1265.38	6453.07	13944	12551.1	17915.6	28857.5	16035.5	12815.1	5220.65	7804.25	9479.37	3585.15	492.906	4966.3	2098.35	2523.59	1.15843e+06	1.21689e+06	866771	361851	141245	122474	254643
M160T15	61.4483	62.4483	5.41959	2.63737e-05	2.55553e-05	UP	160	160	160	15.4039		15.3793	15.4196	14	0	14	62000	601.916	595.064	55279.5	46229.2	1049.57	661.945	613.609	936.433	1159.67	116.788	488.559	353.216	601.883	863.777	2645.76	636.015	835.422	70.7775	863.714	401.638	37.6822	0	199.398	104.374	0	129359	142574	95136.5	44961.6	12931.9	14498.5	26067.5
M174T15	73.1619	74.1619	5.54861	1.97077e-05	2.01673e-05	UP	174	174	174	15.4039		15.3603	15.4348	22	2	20	118096	1596.13	1497.5	116776	95114.5	2279.05	4200.52	1190.98	774.978	3327.62	155.094	688.072	1836.25	2002.23	1941.48	6103.13	2121.45	1581.74	492.621	1685.69	1708.03	200.96	152.01	414.656	150.248	511.818	277033	291228	207448	78546.2	31445.4	27398.5	50306.2
M144T15	74.9662	75.9662	5.58199	1.83016e-05	1.89849e-05	UP	144	144	144	15.4048		15.382	15.4309	20	0	20	92296	912.113	804.361	90694.6	73703.3	1117.9	1509.74	611.716	747.319	986.072	0	355.275	1021.15	1939.69	1952.36	2572.39	2325.52	1796.85	423.07	702.249	163.899	365.47	42.1984	330.099	191.427	0	213855	227593	158580	61326.8	24550.2	16992.7	44258.4
M71T16	1.55348	2.55348	-1.86692	0.0716234	0.0208977	DOWN	71	70.9	71	15.5742	1-octen-3-ol	15.2127	15.5782	26	16	6	89624	56898.9	23159.4	36626.7	44042.5	43765.6	79114.2	102060	73550.1	67341.3	86308.6	48185.4	25167.5	46919	79395.6	53483.2	100722	67345.3	36420	32362.6	35874.9	38798.3	49089.8	59238.1	24563.7	45171.3	16770.5	30595.8	28302.3	6124.91	38698.4	19985	16713.5
M72T16	1.501	2.501	-1.40645	0.171047	0.0452072	DOWN	72	72	72	15.5742	1-octen-3-ol	15.5702	15.5782	26	16	10	274304	130754	55202.1	87111	131048	143638	150476	221893	207908	151730	245620	116023	43456.2	104880	116257	139185	190389	191920	69912.7	53897.2	81044.7	102453	121605	96154	88845.4	108543	52278.9	41105.5	57419.9	11358.7	75032.4	55209.2	39574.4
M82T16	1.5328	2.5328	-1.84397	0.0755364	0.0219096	DOWN	82	82	82	15.5748	1-octen-3-ol	15.5703	16.0521	28	16	8	71416	43758.1	16311	28547.8	34099.8	44135.4	79561.7	67510.5	61211.7	51115.4	64469.5	40768.8	20760.9	33921.3	43156.2	50506.4	56910.7	53692.4	24924.7	21771.7	31070.1	31013.8	44843.2	36772.5	21274.4	39528.1	17891.8	16331.4	19485.5	8126.83	26122.5	21808.1	8716.19
M48T16	8.76202	9.76202	8.51879	2.70602e-08	7.22171e-08	UP	47.9	47.9	47.9	15.8143		15.7797	15.8236	16	1	15	11183	1742.05	1628.8	19176.5	9236.1	4804.32	4097.35	5341.25	2451.52	1120.2	4150.34	1363.68	538.672	701.248	1174.14	2631.36	0	0	0	520.681	276.126	357.554	1689.63	1827.77	1647.02	1890.1	8399.63	12641.1	9880.96	11817.2	19063.7	37254.7	19753.8
M68T16	3.06124	4.06124	6.196	2.04468e-06	2.82624e-06	UP	68	67.9	68	16.0347		15.9811	16.086	15	2	12	35568	16049.8	7554.81	49132.2	23272.3	27224.5	23112.9	14930.8	14460.7	17532.2	14039.3	8004.75	10112.2	13150.9	21274.6	27019.7	28821.7	31129.7	9927.76	9551.42	13162.9	9627.23	13018.9	9316.96	4832.85	16793.8	62270.3	80257.9	64645.5	54969.6	22969.2	18962.4	51146.8
M159T16	26.1015	27.1015	6.381	3.13693e-06	4.04665e-06	UP	159	159	159	16.2693		16.1829	16.7799	29	7	21	244032	9789.07	5641.22	255509	176376	17251.7	16024.6	8842.37	13822.4	13417.4	2964.18	7842.6	15961.6	6249.51	14702.8	19740	13464.2	10786.7	5519.38	11483.5	11904.2	4359.89	809.174	6578.39	667.447	3178.42	510677	510499	392163	146234	99206.3	93862.8	101803
M160T16	27.013	28.013	5.89304	9.10383e-06	1.0451e-05	UP	160	160	160	16.2694		16.2211	16.2852	11	0	11	31488	865.403	603.139	27397.9	20623.5	1493.38	2162.44	503.993	1285.8	1095.03	109.53	971.29	174.044	631.601	1525.17	1835.12	1028.03	995.066	370.222	1157.99	1184.81	338.489	92.9655	851.58	0	366.932	57186.2	58527.1	41453.6	16145.5	8231.8	9780.73	9289.89
M174T16	34.8358	35.8358	5.99018	7.35227e-06	8.68536e-06	UP	174	174	174	16.2769		16.2254	16.2889	18	0	18	90912	2492.76	1828.15	86837.4	64499	4286.9	4557.54	3772.03	3308.47	3689.31	737.281	1293.07	983.382	2360.52	5412.31	5980.89	4101.87	3438.13	484.599	2251.93	2989.6	618.039	135.782	1460.55	102.571	383.242	177377	181082	137840	49688.5	28988.3	27451.1	30941.5
M69T17_2	1.52003	2.52003	-2.82359	0.00769506	0.00290442	DOWN	69	69	69	16.5664		16.5495	16.598	31	13	18	69608	103618	47014.7	68168.6	33161.5	78221	152591	107891	132652	88124.4	74748.3	26330.5	113088	36630.3	79877.9	34658.4	84813.2	41354.7	155289	122979	179189	103461	173706	146260	83565.8	160550	53388.4	60561.1	71945.6	18892.1	34458.1	32468.5	49519
M84T17_1	1.51445	2.51445	-2.60995	0.0128643	0.00448573	DOWN	84	83.9	84	16.5664		16.2164	16.6012	44	20	21	66040	92147.4	42889.6	60845.4	34367.3	69985.2	136172	81518.6	115368	69723.2	59522	18917.8	94212.6	23242.1	67081.8	126422	58250	31230.6	132046	110099	159489	91166.8	155356	121180	64447.5	149666	40660.8	45198.4	64457.5	14206.1	19772.1	132611	44867.6
M57T17	1.59986	2.59986	-2.83955	0.00736192	0.00279861	DOWN	57	57	57	16.5687		16.5505	17.041	49	21	21	584128	823301	404954	514608	290166	639113	1.27659e+06	753502	1.09311e+06	670141	569174	192999	923553	231116	591821	241254	634601	306684	1.24532e+06	1.07821e+06	1.45214e+06	841259	1.40237e+06	1.12027e+06	633964	1.39213e+06	399657	464524	597547	114912	197325	180124	414498
M98T17	1.59294	2.59294	-2.52702	0.0161749	0.00545048	DOWN	98	98	98	16.57		16.5534	16.6012	38	18	20	52776	67179.1	37635.5	42173.1	25296	53950.2	109661	54674.3	90556.8	51289	44528.5	14479.9	75659.6	17181.6	32462.4	16848	38847.6	19421.2	107306	92977.1	126756	74151.6	123983	94095.9	52960.2	118972	31923.4	34810.5	48487.7	7808.28	15898	13307.4	31972.9
M56T17	1.55806	2.55806	-2.52109	0.0163603	0.00550399	DOWN	56	56	56	16.57		16.5505	17.0448	52	21	21	124728	163923	88116.7	105209	60210.5	124759	264878	150263	221053	137449	108552	25804.2	184106	42659	94204.4	47254.3	98388.9	56935.4	250620	226506	302948	174156	294596	231402	124154	281692	76203	93518.8	124398	24266.8	43254.4	36621.5	81512.1
M42T17	1.74	2.74	-3.03309	0.00449559	0.00184933	DOWN	42	42	42	16.5715		16.5495	17.0424	30	16	9	33872	47905.9	25288.7	27532.2	17550.1	38190.6	81561.4	49711.4	62546	45021.5	32778.5	12544	50201.7	11919.6	24574.6	13452.2	26139.4	18382.4	70499	65770.4	83636.4	51431.5	85280.3	69003.3	30556	82824.3	26061.3	26825.8	32908.5	5138.74	10538.5	7046.68	16371.6
M55T17	1.62224	2.62224	-2.81446	0.00799593	0.0029987	DOWN	55	55	55	16.572		16.5495	17.0449	36	16	15	149504	202221	105321	124656	69697.1	174665	286191	273967	281525	173335	143328	33351.8	206829	52876.2	78488.3	79536	140081	70728.4	306410	272145	364405	208734	364184	257502	134696	343666	106249	74738	142557	35853.3	75791.6	39572.9	107967
M83T17	1.57838	2.57838	-2.52244	0.016292	0.00548431	DOWN	83	82.9	83	16.5735		15.9968	17.2626	74	20	21	151744	201355	110477	127571	75914.8	155196	331829	171239	275228	159424	136002	37095.6	231490	49547.6	100581	55843.5	110539	78037.5	308787	276644	373971	215557	366958	278773	158298	357424	97989.2	106605	142478	32871.8	53430.8	19811.5	97740.5
M58T17	1.76496	2.76496	-3.36531	0.00199561	0.00091569	DOWN	58	57.9	58	16.576		16.5495	17.0894	23	13	10	25152	45680.5	23321	25881.8	13526.8	38258.1	66193.1	11261.8	61889.3	50132.2	36235.2	12967.7	66123.1	13681.4	37908.2	13503.2	38680.5	18715.1	92217.1	62036.7	66004.7	39325	58816.4	63383.8	35044.3	76912.9	24403.1	19284.9	34463.8	8227.84	7429.83	11757	22878.2
M70T17	1.59828	2.59828	-2.76632	0.00890919	0.0032796	DOWN	70	70	70	16.5892		16.5495	17.2689	70	21	21	151104	213197	108284	133392	75841.1	170966	336301	208538	290951	167549	166928	60665.2	235065	26026.2	128638	67287.5	149877	92750.8	311392	276390	403472	217116	366837	276856	163493	360037	104666	116678	149797	33014.3	60972.3	25762.9	106479
M112T17	1.53835	2.53835	-3.07602	0.00382549	0.00161765	DOWN	112	112	112	16.5969		16.5534	16.7895	38	18	11	23792	34227.5	13603	22249.4	11549.3	24010.8	46631.5	27051.8	47951.6	23136.7	17744.7	24039.4	35122.2	12649.4	23558.3	36851.5	27928.6	17193.9	45488.5	43336.2	56148.8	31490.4	56709.2	42985.4	24300.3	54447.6	26078.8	14096.8	21054.2	4598.29	8320.64	15478.7	16484.7
M71T17	1.78198	2.78198	-4.41609	9.76243e-05	7.58041e-05	DOWN	71	70.9	71	16.6467		16.2598	17.0725	51	16	13	38472	68795.2	26460.6	38606	16770	55015.8	94580.2	67062.2	72773	43584	53677	42161.1	69418.2	21200.1	102270	64039.6	96921.9	35338.5	134957	87846.8	72767.1	45540	76165.8	75025.4	46663.6	87691.2	29456	32926.5	50698.4	12531.5	37579.1	22807.1	40882.3
M189T17	1.57178	2.57178	-2.9645	0.00539123	0.00215041	DOWN	188.9	188.9	188.9	16.8785		16.8708	16.8863	15	11	4	11296	12859.1	5958.46	8181.26	4097.11	18197.7	12323	22211.1	14463.4	9125.31	13139.3	7887.9	14680.9	10663.8	21020.4	9595.11	19982.5	5442.25	19638.5	7321.56	4552.11	4376.21	4791.33	16943.3	20732.5	12954	9633.78	12620.2	10337.4	4906.42	7555.17	5059.57	13968.1
M72T17	1.54753	2.54753	-3.15362	0.00366973	0.00156194	DOWN	72	72	72	16.8786		16.566	16.8825	36	16	15	10858	16340.2	7483.54	10558.9	3817.28	19020.7	14959	21372.8	14226.9	12575.5	14744.3	9202.03	14907.2	10805.3	29505.2	11307.9	31157	6216.86	18554.4	10087.1	6629.99	7229.45	29865	22788.5	18628.4	19360.9	12164.7	12425.7	14931.1	6979.96	10361.8	8300.68	12838.9
M148T17	1.51651	2.51651	-3.12622	0.00373875	0.00158672	DOWN	148	148	148	16.8823		16.8708	16.8864	41	21	20	173120	227095	97932.8	149748	57130.2	296392	186536	349139	218355	198913	253895	134767	249713	179616	336664	172333	344888	101254	307848	129514	82420.2	105477	90020.4	375336	326358	329552	179017	220872	154366	110330	152148	125188	209286
M221T17	1.51031	2.51031	-2.92541	0.00615981	0.00240739	DOWN	221	221	221	16.8824		16.8708	16.8902	37	19	18	185984	243615	109864	161301	67497	318990	204106	370650	239868	205013	257532	141011	262233	185630	377121	187397	373916	107774	343034	132003	84435.5	96481.1	98828.4	415540	353121	361226	194417	236080	193149	103136	171396	123277	230068
M249T17	1.60175	2.60175	-3.25917	0.0025326	0.00113345	DOWN	248.9	248.9	248.9	16.8824		16.8708	17.5009	38	19	18	40328	53093.5	23760.5	32998.4	15289.9	69815.6	40710.7	81883.1	50863.5	45246.7	59800	30867.6	56433.7	40679.3	81163.7	42404.3	82117.9	24608.1	75748.9	31340.7	20128.4	23948.9	15072.8	86250.1	77503.1	78377	39881.3	47420.6	40262	26180	35715	28943.6	48856.7
M84T17_2	2.98993	3.98993	-2.73225	0.0127372	0.00444803	DOWN	84	84	84	17.0331		17.0236	17.2752	34	14	19	180224	139351	155025	46606.8	12788.9	308853	393333	472951	342817	380354	303277	93340.9	7736.54	80848.5	74400.5	56911.4	151194	98932.9	14896.7	8533.36	20511.9	22262.9	14928.7	36217.4	17079.2	26988.2	27354.3	35369.8	25767.6	36901.8	44884.5	66449.2	29018.3
M69T17_1	1.99979	2.99979	-2.25351	0.0353325	0.0109143	DOWN	69	69	69	17.0346		16.7624	17.2859	48	16	19	200640	168699	170507	84358.6	18516.1	355177	450797	536659	382415	435743	349530	112554	27129.3	102225	102196	88525.4	185133	126746	28657.6	21013.2	40047.4	34553.9	37999.7	49396	30189.5	46000.4	64902.2	73509.7	59058.4	72494.2	83460.3	104720	68383.6
M179T17	9.12799	10.128	-10.9589	4.68705e-11	2.51803e-10	DOWN	179	178.8	179	17.2229		17.0619	17.4925	17	15	2	28040	43542.2	15255.8	4770.18	5488	56432.6	52381.8	37228.2	26788.7	36558.8	34920.5	23922	77491.9	25880.1	15630.2	27737.3	43000.2	55922.9	52507.6	63602.6	59150.8	52846.5	45976.1	48548.8	34010.3	43847.7	1597.72	3417.37	1682.05	2779.62	3338.39	5408.05	2944.68
M113T17	3.91792	4.91792	7.45197	6.79658e-08	1.43557e-07	UP	113	113	113	17.2718		17.2635	17.2762	14	1	13	27376	8309.93	5368.68	32557.6	13911.1	18526.8	11499.8	13439.4	6794.85	9824.61	5931.48	9191.59	6347.51	7749.3	13408.6	11733.8	20185.3	12290.2	4112.77	2028.69	2448.95	1689.87	4233.46	8556.8	1703.72	2810.85	43383.3	54558.7	42021.2	25503.3	8639.46	10701.6	23539
M159T17	41.9899	42.9899	6.01984	6.92214e-06	8.24716e-06	UP	159	159	159	17.2911		17.2742	17.3002	16	0	16	39208	1306.73	609.085	54869.3	40769.7	2388.51	1041.79	2043.38	1941.98	1829.7	889.897	965.394	781.103	1126.51	1535.54	2158.8	2086.54	976.918	822.686	1672.08	1812.54	798.353	453.158	1031.61	470.088	614.682	115917	112442	93396.7	31858.6	17832.9	16285.4	22357.9
M108T17	14.6729	15.6729	12.1661	6.52458e-11	3.23924e-10	UP	108	108	108	17.3393		17.3113	17.991	25	2	21	106944	11938.1	8451.82	175166	60898.7	5720.93	13825.2	12947.1	25182.8	10047.6	11202.1	6662.69	8131.04	3496.66	3900.96	7265.03	23784.6	35909.5	5120.97	8106.34	6158.9	6312.02	6026.71	14265.9	13680.3	22952	148771	186198	155072	180242	121045	102860	169545
M121T17	12.545	13.545	10.1987	1.73829e-09	6.92074e-09	UP	121	120.9	121	17.3394		16.4688	17.5346	30	5	19	183936	24240.9	14316.1	304101	124932	17893.4	23023.6	26854.8	43058.2	20931.5	26223.6	17505.4	21509.5	9741.26	13894.6	19792.6	45520.2	66360.9	17050.1	12996.1	9457.33	7080.56	29557.7	40497.3	24844	15265.3	270271	333587	308749	13781.3	229461	181415	299341
M166T17	21.1025	22.1025	11.8448	1.32591e-10	6.12785e-10	UP	166	166	166	17.3403		17.3339	17.3475	18	0	18	24056	1672.87	1311.69	35301.7	12944.2	1550.75	1821.47	2444.88	3839.66	1399.48	1207.97	995.325	940.295	354.581	1211.39	648.324	2402.75	6164.78	1992.27	599.076	809.206	752.776	1241.3	1443.39	948.855	2361.83	25669.6	37409.2	30473.7	36295	21071.6	18253.6	35849.9
M93T17	12.6328	13.6328	12.1874	6.43323e-11	3.20598e-10	UP	93	93	93	17.3405		17.3301	17.5143	15	1	12	204352	27709.2	16356.6	350045	120092	19858.4	24377.7	27170.2	40030.4	20718.6	28610.7	13985.3	23670.1	6926.44	12744.3	19094	50669.9	58989.5	21308.3	15026.7	15903.7	73882	20315.8	25391.3	25599.7	37620.6	281127	383853	317688	351088	259824	182728	331782
M79T17	5.3616	6.3616	9.52687	3.83315e-09	1.43167e-08	UP	79	79	79	17.3434		17.3272	18.0147	19	3	11	63568	18506	7038.94	99221.7	38182.1	19449.1	29225.9	25786.7	28859.2	24351.7	17625.7	7145.4	20149.8	4763.68	9754.68	9357.49	17247.5	18805.2	17644.4	11966.2	25914.2	14999	21712.6	27219.7	18793.9	17853.3	24805.6	128566	87672.2	89007.7	87907.5	39636.1	78005.4
M149T17	6.61353	7.61353	7.76196	7.28244e-08	1.50713e-07	UP	149	148.8	149	17.4759	Benzaldehyde	17.0589	17.5104	22	5	15	51832	21198.6	18457.2	140198	67788	16193.6	10076	10141	13013	13333.2	15502.3	7079.55	26017.8	15911.4	11443	24975	60817	86217.2	18695.2	11304.7	15641.7	20634.3	20523.3	17397.4	15249.5	15004.8	192157	15487	187648	260723	120516	66983.7	121222
M192T17	4.70968	5.70968	8.46572	1.50483e-08	4.58206e-08	UP	192	192	192	17.4821	Benzaldehyde	17.4574	17.5078	23	9	14	182784	107222	58633.5	504979	207173	66530.7	95123.7	45152.1	73577.8	100515	81420.5	54411.6	133689	71592.4	70237.6	121322	181031	318593	120396	133325	65239.3	99463.2	85207.9	95034.4	95634.4	144156	612456	480491	650614	913448	397091	227333	452647
M177T17	4.49761	5.49761	8.48326	9.73743e-09	3.24923e-08	UP	177	177	177	17.4962	Benzaldehyde	17.4582	17.5078	35	14	21	102088	71247.5	42474.9	320443	127736	33168.4	60670.4	29816	52366.2	68843.3	52157.3	29959.9	92016.7	43898.2	43525.4	77836.5	130572	219500	72717.6	97832.1	48935.8	60076.1	54009.2	58497.4	65938.1	103860	393732	315053	405546	567119	244792	162249	296584
M163T17	1.94738	2.94738	2.42837	0.0234714	0.00753427	UP	162.95	162.8	163	17.4977	Benzaldehyde	17.0542	17.6952	26	12	9	18536	16693.2	7655.16	32508	28845.6	15256.6	15883.3	14983.1	20616.9	17641.5	11941.4	12852.9	14147.6	11187.9	10584.7	28963.6	11186	42296	15759.9	18526.8	10040.9	13131.7	7276.97	15076.1	22503.8	20699.1	22633	23413.5	34320.1	98910.1	14809.2	16932.1	16364
M78T18	1.84962	2.84962	4.78276	2.89756e-05	2.77771e-05	UP	78	78	78	17.5055	Benzaldehyde	17.4915	17.5222	19	7	12	28616	33517.9	15803.4	61995.3	22243	41811.6	46140	57239.1	75815.6	60044.8	41679.2	14554.4	22281.3	23917.4	28397.3	24774.3	31435.7	41235.7	20534.2	21510.9	18445.8	22128.9	21271	31492	24816	34350.6	91845.2	71895.4	80422	69075	31142.8	16169.1	41013.8
M136T18	4.3553	5.3553	7.01649	3.02607e-07	5.27414e-07	UP	136	135.9	136	17.5058	Benzaldehyde	17.0638	17.5222	30	5	16	85992	52736.9	34648.2	229685	110251	40718.4	40608.6	27345	38455.9	55371.5	45211.7	28497.2	51246	35040.1	39404.3	69748.8	111712	174616	38341	75433.8	43717.8	47359	49652.6	44931.6	43268.2	6795.43	6320.27	131323	313527	470701	195029	140810	229372
M137T18	5.78212	6.78212	8.56057	1.78038e-08	5.18565e-08	UP	137	137	137	17.507	Benzaldehyde	17.1383	17.519	16	2	13	34688	8487.94	4919.2	49078.3	21164.3	6775.31	7975.23	4908.49	7251.62	6543.99	5914.26	4681.6	10539.1	5155.87	5973.2	9112.27	19024.7	24127.1	7744.28	11599.4	3532.57	7028.25	6615.17	5099.19	7019.34	11625.9	53956.5	43247.8	59566.4	81753.5	34366	93765.5	39521.2
M119T18	5.30149	6.30149	8.38665	1.75899e-08	5.14068e-08	UP	119	118.9	119	17.5124	Benzaldehyde	17.4676	17.5268	16	3	13	50616	18854.4	12120.7	99956.4	42625.4	19358.4	15212.8	11054.2	12330	19265.9	20631.9	9974.55	23334	15532.4	13891.2	21063.4	21680.3	68414.4	11800.5	18357.2	14760.2	16524	11475.9	11609.6	15757.3	23914.5	124584	98592.4	134196	163780	70320.7	48397	86122.1
M89T18	5.13868	6.13868	4.38831	0.000235585	0.000159275	UP	89	88.9	89	17.6764	Ethyl nonanoate	17.0582	17.6908	41	18	21	260480	30426.8	28109.3	156353	128462	30730.4	28377.9	78776.6	120321	42260.7	78250.2	16066.9	11494.2	17331.1	13284.6	16839.5	14069.7	19984.4	12252.6	17368	18299.3	12618.4	12929.2	30209.8	24468.4	23029.6	101093	117252	100624	34195.8	640358	97328.6	139284
M60T18	5.22086	6.22086	4.44409	0.000203781	0.000141715	UP	59.9	59.9	59.9	17.6781	Ethyl nonanoate	17.6534	17.6908	32	12	20	525824	61093.8	58180.8	318962	259461	62974.1	55337.4	144668	254124	82690.5	164831	29853.2	28809	33655.4	26220.4	36302.4	27331.9	47071.5	29611.1	26195.6	34434.3	24796.1	22888.1	61687.2	47909.8	41578.1	210164	238306	206509	63636.1	1.29e+06	203068	282375
M141T18	5.2086	6.2086	4.34519	0.000263001	0.000173783	UP	141	141	141	17.6789	Ethyl nonanoate	17.6534	17.6908	41	20	21	763584	84924.7	79453.6	442339	368472	87226.8	80156.8	218497	342441	120440	214422	45837.5	34897.1	45522.1	37489.5	40748.7	38939.1	59934.2	34346.5	43685.1	42216.9	39926.7	30325.7	85696.8	71688.8	68980.7	285859	327800	278596	97938.2	1.83581e+06	274637	392016
M102T18	5.76589	6.76589	4.38573	0.00023344	0.000158122	UP	102	101.9	102	17.679	Ethyl nonanoate	17.661	18.0966	28	7	20	108536	11160.7	12373	64351.6	54183.5	10350.6	9917.56	32970.5	50786.7	15744.6	31891.1	4829.27	3258.21	4772.89	5660.13	6430.03	4661.63	5498.29	3985.93	5676.14	5571.59	4484.72	3114.41	12376.5	9348.2	3046.67	42060.3	46891.5	38271	11243.1	269582	40900.8	58143.4
M90T18	7.30672	8.30672	4.10037	0.000501529	0.000293876	UP	90	90	90	17.6791	Ethyl nonanoate	17.675	17.6869	13	0	13	20824	1524.72	1859.49	11140.7	10584.7	864.431	1823.87	5474.97	6929.06	2405.13	4679.25	508.34	361.061	794.94	260.393	1240.82	279.577	1187.41	308.582	521.893	467.876	389.634	617.271	1318.23	765.467	820.822	6069.76	7229.09	7692.3	1676.39	50460.2	7280.4	10342.7
M45T18	1.87417	2.87417	3.61625	0.000933687	0.000471728	UP	44.9	44.9	44.9	17.6791	Ethyl nonanoate	17.5207	18.2023	28	11	15	178944	104483	64406.8	195818	96166.6	253859	111173	108826	106641	80078.7	108511	88377.9	139962	45284.1	54502.4	302173	89591.4	142815	62734.2	61241.8	98205	87792.4	82031	70570.4	41795.1	57969.4	226130	137761	152453	74171.9	327828	200934	205228
M61T18	5.39711	6.39711	3.83181	0.000943879	0.000476191	UP	60.9	60.9	60.9	17.6792	Ethyl nonanoate	17.0786	17.6908	20	5	15	440576	43260.3	42024.3	233481	223575	49534.2	38369.9	120038	178523	53664.5	108716	19827.8	17092.9	18474.1	23037.6	26467.7	16897.9	30763	20830.9	20479.8	22002.2	20066.8	11294.8	47238.1	34263.3	30884.1	120988	167604	159999	47411.2	1.07238e+06	118608	199362
M157T18	5.6269	6.6269	4.36785	0.000248175	0.00016596	UP	157	157	157	17.6792	Ethyl nonanoate	17.6534	18.0925	36	13	21	309952	31749.3	32747.7	178650	150603	30058.5	25616.3	86965.4	137234	47565	86563.9	11008.2	8760.46	17412.5	12566.6	15716.1	14279.4	22236	13980	13105.6	18551.7	11067.5	10250.6	31052.8	28170.5	24575	111032	133006	113789	37270.6	749085	109670	159160
M62T18	5.21579	6.21579	4.48073	0.00016876	0.000121177	UP	62	61.9	62	17.6798	Ethyl nonanoate	17.4943	17.6908	16	2	13	12114	1333.17	1539.02	6953.52	5538.24	1562.82	1191.93	3270.41	6670.86	1335.56	4032.18	750.827	623.638	760.773	985.054	745.542	1131.58	549.769	167.978	691.337	393.511	445.779	360.345	481.155	1045.66	799.8	4483.28	4778.17	4587.56	1430.39	26646.5	4815.66	5750.53
M57T18_2	2.93404	3.93404	3.95978	0.00061183	0.00034176	UP	57	57	57	17.682	Ethyl nonanoate	17.6751	17.6975	30	9	21	457984	102763	63181.5	301512	221160	78155.8	96483.4	224535	282060	127415	164132	50871	49979.2	55760.4	111698	82246.8	153206	62812.7	60618.9	79980.7	47578.5	60664.3	34312.3	158106	77355.4	100060	208732	229498	219939	85450.3	1.13618e+06	195940	264725
M143T18	5.58477	6.58477	4.37655	0.000242717	0.00016308	UP	143	143	143	17.6827	Ethyl nonanoate	17.6534	18.1032	37	13	21	369408	37614.8	38477	210070	176426	40611.4	33462.2	103717	161578	46572.1	103869	20132.1	11528.3	22403.2	14847.1	19443.1	13393.2	23663.2	11380.8	21817.3	21152.8	17155.5	9989.3	29556	33707.8	29931.3	136787	155402	133490	45694.9	878824	127587	184594
M73T18	4.93187	5.93187	4.62474	0.00012495	9.38167e-05	UP	72.9	72.9	73	17.6828	Ethyl nonanoate	17.6637	18.2102	19	6	12	653440	68392.5	64442.8	337303	258548	61464	56765.5	193467	277713	86937.9	164102	46907.7	32663.1	34459.7	28346.5	35036.3	30018.9	55225.5	38524.3	28658.1	46961.1	25803.6	38442.1	54773.9	58806.3	41166.4	269871	256924	261660	85778.8	1.20558e+06	222850	303020
M42T18_2	3.04777	4.04777	3.70418	0.00124812	0.000603731	UP	42	42	42	17.6828	Ethyl nonanoate	17.675	17.6908	19	6	13	189504	38405.5	20504.9	117051	95110	41960.5	24932.4	62724	99006.5	43923.9	70255.5	28649.3	30838.8	29075.8	29198.3	30518.4	49693.5	30421	22074.1	44206.4	12330.3	18685.6	15804.6	55457.4	26058.6	40701	79519.3	77869.4	94511.9	24882.7	466779	78875.6	115405
M74T18	5.39107	6.39107	4.05985	0.000516215	0.000300477	UP	74	73.9	74	17.6829	Ethyl nonanoate	17.4945	18.0685	20	4	14	86584	9061.7	10113	48852.3	43760.5	7187.72	7823.65	25187.8	40095	27032	18342.7	3178.69	1652.55	4578.4	2658.09	5135.01	1641.17	7745.02	2737.93	4917.19	3675.4	4312.34	2472.55	9774.1	5754.78	4393.8	34777.7	32495.8	29206.6	7301.62	215515	27605.6	46371.6
M129T18	7.38186	8.38186	4.122	0.000488044	0.000287737	UP	129	129	129	17.683	Ethyl nonanoate	17.2775	18.0995	15	0	14	111912	7659.71	8211.06	56542.9	53721.3	9366.09	6888.6	22592.1	34524.4	5810.56	20546.3	4671.09	3264.17	5123.84	3390.55	4248.02	2142.65	3719.21	2342.07	3695.89	4075.68	4146.64	1142.71	6370.99	7762.76	5029.53	39845.3	37389.4	34357.2	7747.12	264813	34202.6	43928
M98T18	2.01719	3.01719	2.86372	0.00833633	0.00310391	UP	98	98	98	17.6836	Ethyl nonanoate	17.2449	17.6981	25	4	16	74232	23583.8	13009.7	47573.1	36116.4	20712.8	24524.9	46486.1	56653.8	9020.3	25377	17073.8	22101.4	21631.4	17700.2	21378	32348.5	24816.7	10174	19616.7	13125.1	8670.75	8231.57	48005.9	26695.6	20915.6	26850.2	31301	36116.1	14246.4	182854	32877.1	41859.7
M55T18_2	2.71232	3.71232	3.50351	0.00198462	0.000911121	UP	55	55	55	17.6854	Ethyl nonanoate	17.669	17.6913	19	7	12	602944	136522	70296.1	370293	297580	143200	134281	261804	345227	114511	206680	63812.6	101197	123881	87427.6	117033	160389	146306	74497.2	122690	80786.6	66480.4	47485.5	187746	114951	166586	224088	299804	242761	75952.7	1.48338e+06	235600	334799
M97T18_1	2.41475	3.41475	3.40893	0.00240539	0.00108284	UP	97	96.9	97	17.6859	Ethyl nonanoate	17.6751	17.969	22	5	16	132672	35191.3	17737.4	84978.1	64534.4	28952.1	31938.1	59168	90356.8	31823	49195.2	28456.7	37555.8	31562.4	28652	24754	50974.5	37146.2	20429.3	29665.2	16518.1	13956	14343.5	55055.4	28628.2	29887.1	51367.8	65375.9	56439.7	25907.4	332070	54880.3	77235.4
M69T18_2	2.15156	3.15156	3.36536	0.00260448	0.00116179	UP	69	69	69	17.6863	Ethyl nonanoate	17.677	17.6975	37	17	20	304256	95084.3	43200.5	204580	142703	94434.1	89719.4	167846	215164	102706	132773	78818.2	71847	82519.5	74832.8	71976.4	114703	79704	41683.5	93037	53857.5	52552.6	34415.4	152577	85193.3	106411	140507	156127	130901	56623.3	745076	140885	179391
M56T18_2	1.98158	2.98158	3.29025	0.00312513	0.0013616	UP	56	56	56	17.6867	Ethyl nonanoate	17.2572	17.7099	39	19	19	153408	56014.7	22227.7	110998	73282.3	52473.2	52033.8	96530.7	115497	61361.9	66203.5	46009.1	59481.4	50813.2	46130.4	44137	61099.5	52773.7	35339	49844.9	32213.9	27482.1	22037.9	89488.6	57896.1	57463.5	75802.5	81976.1	84108.7	34630.6	386654	75681.1	99868.1
M84T18_2	1.79426	2.79426	2.67409	0.0134072	0.00464612	UP	84	84	84	17.6868	Ethyl nonanoate	17.6729	17.7016	33	16	17	155008	55880.7	21658.9	100264	72911.2	60771.6	59132.5	99704.5	96884.4	56715.1	74473.2	49847.2	56382.2	47279.3	39807.9	49482.8	72706.2	51212.3	33460.6	49050.7	26595.3	26670.7	20474.8	90089.4	56691.8	56063.2	65205.6	80865.1	68364.4	25933.3	376240	56822.7	92196.6
M58T18	1.79066	2.79066	2.95102	0.00652428	0.00252615	UP	58	58	58	17.6868	Ethyl nonanoate	17.679	17.6946	23	6	17	27288	11564.6	5435.43	20708.2	13117.4	7313.01	10022.8	21790.2	24627	14048.9	13883.7	7872.75	9054.6	10431.7	9771.49	10150.6	15889.8	8504.25	7936.67	8664.74	7019.86	5897.9	4553.65	21629.4	13341.4	10451.7	16337.5	15055.4	12920	6906.27	70792.9	15838.4	17937.3
M71T18	3.09721	4.09721	3.90178	0.000701394	0.000377775	UP	71	71	71	17.6871	beta linalool	17.265	18.2296	78	20	21	340224	69481.1	47856.1	215198	164315	63286.5	59304.4	191530	182905	85130	112320	38288.4	31776.9	45105.4	114225	40186.2	67721.3	50753.6	29883.8	42232.9	36166.1	27947	28927.5	113826	50515.6	47071.8	140286	163817	146405	54700.5	835416	135886	196452
M83T18_2	1.76348	2.76348	2.93187	0.00732614	0.00278716	UP	83	83	83	17.6875	beta linalool	17.6791	17.6945	14	1	13	186880	76868.5	27212	135557	87601.3	79348.4	69638.7	101410	144714	80855.9	95332.2	74893.5	89276.9	71008.5	55041	75137.1	112672	81659.2	49556.8	75924.4	36757.4	38928.3	40486.8	115517	73480.2	52601.4	107779	95865	114340	41662	464880	89626.1	121010
M81T18	1.8722	2.8722	2.81864	0.00956407	0.00347607	UP	81	81	81	17.6908	beta linalool	17.3246	18.0004	28	9	11	99704	34406.3	14346.8	64415.2	46631.8	37501.6	25294.5	62184.9	78784.5	38407.6	15672.1	31818.4	32756.1	33924.5	34870.3	33740.8	39018.2	32878.5	20255.9	33154.4	22260.6	19226.6	19707.9	31556.5	36531.5	42985.8	43565.4	40257.4	45440.9	16378.4	236078	37304.1	60333.9
M138T18	2.43389	3.43389	5.00874	2.08109e-05	2.10729e-05	UP	138	138	138	17.7364	beta linalool	17.7082	17.7572	38	17	21	74416	46591	29451.1	113397	53558.9	70880.2	64762.5	13441.1	19469	35481.3	34220.7	30641.4	109468	39067.4	8869.98	12503.8	65897.4	76590.6	77312.6	103515	46468.1	56147.4	49555.5	20684.5	22555.6	20879.4	231826	207428	207946	113175	40235.1	51672.5	124564
M146T18	77.4028	78.4028	10.5471	1.27696e-09	5.20057e-09	UP	146	146	146	17.795	beta linalool	17.7881	17.804	14	0	14	24144	255.442	189.62	31293.1	13484.2	165.253	507.664	241.354	230.392	716.434	278.749	41.2219	271.319	94.4265	46.0711	541.389	463.559	474.826	326.303	249.264	133.234	115.427	147.307	0	90.6691	229.418	27883.6	28311.7	32006.6	68870	40969.2	21912	41943.8
M94T18	2.05253	3.05253	6.69306	2.21971e-07	3.98079e-07	UP	94	94	94	18.0005	beta linalool	17.9927	18.0202	15	3	12	12871	8984.01	2910.07	18440	5783.4	11052.5	14204	7346.2	8357.76	9931.43	6456.15	6783.35	9207.35	9093.18	9703.69	10822.7	13074.2	16082.9	5958.5	7007.82	9820.34	8075.33	4670.33	7763.14	4930.05	8323.39	12622	17969.7	15525.8	16735.9	13323.4	19483.9	18777.8
M121T18	2.13572	3.13572	7.05686	5.9632e-08	1.30571e-07	UP	121	121	121	18.0008	beta linalool	17.9915	18.0166	24	6	18	26440	20300.3	7288.57	43355.9	13077.9	23931.2	32191.5	12791.3	21266.1	20134.8	14811.1	15400.1	13698.9	15947.9	18422.5	28340.5	35948.1	35196.7	15865.1	11859.8	20289.2	19359.1	17275.7	23409.9	10966.7	19200.9	35332.7	35637	28479.5	38886.3	33595.7	46348.6	32230.6
M93T18	2.07033	3.07033	6.77479	1.78452e-07	3.31103e-07	UP	93	93	93	18.0025	beta linalool	17.9944	18.0202	25	6	19	84352	61059.1	19852.9	126412	39497.1	60468.6	96344.5	52993.6	55220	75136.6	42571.4	43371.5	50060.8	59009.1	62960.9	80192.8	79170.2	112774	49094.4	39526.9	55501.6	55030	65747.1	65073.1	22681.2	59313.5	93378.2	87666.3	72557.8	117133	96609.5	143643	127309
M144T18	37.8051	38.8051	5.27708	3.52243e-05	3.2931e-05	UP	144	144	144	18.0752		17.2817	18.113	23	1	17	37864	1032.84	2805.85	44673.9	37793.6	953.947	611.523	297.21	13172.4	533.63	54.449	123.535	501.765	308.981	755.21	1389.61	1025.78	719.602	129.642	265.512	202.517	0	134.334	279.773	93.6369	136.689	101149	104331	77425.6	25670	90019.7	7476.96	18539
M159T18	55.6513	56.6513	5.44478	2.49093e-05	2.43669e-05	UP	159	159	159	18.1017		17.6752	18.1242	27	2	21	228480	5433.89	3512.22	302403	249918	7483.7	8052.79	2482.03	5834.54	6761.87	10742.2	3848.75	8598.58	8655.74	8581.01	12911.3	7958.82	4018.73	2114.59	3867.11	5465.49	876.175	880.443	2805.46	940.124	1232.28	758103	722167	554987	205472	84955.6	74839.8	147607
M174T18	82.4429	83.4429	5.1076	5.36719e-05	4.67592e-05	UP	174	174	174	18.105		18.0752	18.1242	18	0	18	52912	634.461	500.189	64578.2	57368.6	1421.01	1190.66	330.202	1059.45	1031.18	95.794	367.803	417.056	992.327	777.323	1803.49	653.843	1156.09	367.056	438.438	545.307	78.8734	55.9494	373.314	0	168.517	171203	158886	122125	40891.9	16422.1	15562.3	32136.3
M69T18_1	1.76512	2.76512	10.1428	2.46558e-12	1.82232e-11	UP	69	69	69	18.2101	1-octanol	17.9956	18.2335	59	21	21	213888	217194	46186.3	383373	59194.3	202850	239676	254317	240428	210679	183997	194008	227209	189946	257535	280500	313456	313540	208371	199054	176428	170355	205121	164980	147033	181582	326708	324743	317882	473649	381078	534706	297506
M82T18	1.87042	2.87042	7.9928	2.44727e-09	9.41907e-09	UP	82	81.9	82	18.2102	1-octanol	17.271	18.2259	32	10	18	36728	32149.2	8718.84	60132.5	13468	30692.8	32751.2	32493.7	53625.7	34203.2	22228.9	42913.2	35649.8	24030.2	32108	42492.6	41814.1	40852.5	28507.3	26629.8	25941.9	30333.3	32141.4	24424.7	14566.9	26731.8	57073.6	45737.4	45855.6	76995.7	65156.2	87317.2	49577.6
M42T18_1	2.17949	3.17949	9.73371	2.18952e-11	1.32404e-10	UP	42	42	42	18.2102	1-octanol	18.2062	18.2296	24	7	17	112984	81054	24395.7	176656	37824.2	64178	87513.7	79948	111209	71745	74580.3	73495.8	104370	56291.9	105760	107230	127823	126274	69632.5	69560.3	56062.7	60440.8	81446.4	82888.7	46266.9	45416.3	132042	143112	114950	236627	186109	263465	126186
M55T18_1	1.97196	2.97196	10.4134	7.92255e-13	6.97147e-12	UP	55	55	55	18.214	1-octanol	17.9917	18.2297	35	13	21	253056	216640	60172.2	427206	70468	181337	242721	263679	202683	175181	163471	176208	196788	216938	297321	269620	347018	353017	181867	181914	178602	179471	228738	188046	114965	209849	364080	354868	350325	539900	433468	612577	313300
M68T18	2.02107	3.02107	9.97478	5.93969e-12	4.08728e-11	UP	68	68	68	18.2141	1-octanol	17.9917	18.2298	30	10	19	62856	50547.3	13867.2	102160	19233.8	43737.7	63884.4	57735.3	57364.2	42539.1	32885.7	46181.9	45673.7	50922.8	56739.8	65727.5	73110.1	86618.6	53765.2	46494.3	33949.4	37855.3	44120.1	37118.6	32235.2	52835	86653.7	80080.7	78560.4	131154	111844	152592	80102.7
M70T18	1.85773	2.85773	10.7029	7.69385e-13	6.80679e-12	UP	70	70	70	18.2178	1-octanol	17.6834	18.2296	47	21	21	217408	199235	43307	370126	58976.6	177905	218818	221335	229541	181279	165508	192970	202661	175822	236651	255645	288055	297484	180874	189969	153784	158714	191351	159026	130398	176141	320340	305372	302304	463618	362739	524872	286813
M57T18_1	1.59466	2.59466	7.91093	1.11963e-09	4.60925e-09	UP	57	57	57	18.2179	1-octanol	18.2062	18.2296	42	21	21	112032	129055	32975.4	205798	29814.3	119484	125490	170803	139684	125548	104932	113384	130355	109051	177791	147259	222080	173775	121027	117092	96451.6	94921.3	108267	116767	87103.2	108885	185020	172765	181982	247302	204608	284807	158253
M56T18_1	1.89258	2.89258	10.5131	1.14841e-12	9.35149e-12	UP	56	56	56	18.2179	1-octanol	18.2062	18.2296	42	21	21	288192	256584	59722.4	485607	79994.1	218673	279899	289502	291652	233850	206939	250633	259190	232991	307030	340808	370135	400432	230929	242100	206448	203956	243163	190966	163773	225196	415733	403814	391617	617599	472808	694894	370106
M83T18_1	1.84244	2.84244	10.4432	1.24523e-12	9.93978e-12	UP	83	83	83	18.2179	1-octanol	18.2062	18.2296	42	21	21	151296	140642	31474.9	259124	41381	133376	155406	164100	158011	128666	110404	137712	142933	127594	163014	179121	204199	213821	132631	130585	110768	110557	133595	103003	93217.2	120776	221034	215013	207653	325780	254158	366220	199244
M84T18_1	1.87111	2.87111	10.6293	8.52651e-13	7.39796e-12	UP	84	84	84	18.2179	1-octanol	18.2062	18.2296	42	21	21	183744	163557	36707.9	306033	49250.6	148637	179665	180008	187969	153009	135495	159089	161437	144844	190063	216724	232810	252595	150771	154241	132033	128785	156255	126966	102720	140584	264463	255018	247469	388932	303155	433385	232401
M133T19	6.15456	7.15456	11.7015	5.48672e-12	3.80984e-11	UP	132.9	132.9	133	18.8153	Ethyl decanoate	18.3483	19.327	30	5	20	58120	14192.6	10886.7	87349.4	26500.9	14029.6	8849.34	22766.1	10497.9	9391.77	8000.22	22451	6380.44	26159	30690.5	28709.2	32258.6	35153.3	6597.62	5667.37	2449.53	2439.19	2994.63	5474.3	8005.56	9079.96	85774.1	96462.7	93930.7	15433.2	102367	92192.7	71926.2
M42T19	3.45911	4.45911	13.0057	8.81517e-14	9.77297e-13	UP	41.9	41.9	41.9	18.8154	Ethyl decanoate	18.8076	19.0782	20	0	18	19656	10053.7	3939.04	34776.7	7769.72	8192.31	8073.8	11693	12746.1	10976	6597.37	13537.8	9592.57	14446.6	13850.6	14949.5	18190.7	15577.2	8305.69	7445.92	4648.94	4544.83	4991	7890.85	7578.29	7297.64	37215.8	39205.6	38361.9	27195.5	40806.3	36678.1	25929.4
M43T19	1.69284	2.69284	4.22474	0.000190356	0.000133996	UP	42.9	42.9	43	18.8155	Ethyl decanoate	18.8037	19.1903	22	5	17	81600	49927.1	32716.8	84518.6	18370.3	49245.1	32200.3	49124	52261.2	40727.1	31550	38445.4	32632.7	37507.2	95624.1	58488.6	166935	44395.3	36302.8	33379.6	18286.5	45967.3	90735.1	36713.8	27909.2	30038.5	87960.5	77281.3	84182.5	65850.6	93657.8	130701	67796.2
M115T19	7.62884	8.62884	15.1266	8.88178e-16	1.26602e-14	UP	114.9	114.9	114.9	18.8155	Ethyl decanoate	18.8079	19.2246	32	9	21	87720	18274.8	17415.5	139415	32303.8	7106.42	9486.9	9175.87	16315	12754.3	10575.5	37509.5	6945.51	46357.1	39078.5	42320.6	58972.2	39720	8249.58	6669.17	2386.84	3220.95	2780.3	9129.47	6139.87	8876.52	133703	146452	145300	110154	170787	142151	104423
M69T19	2.78799	3.78799	-6.15331	9.41787e-07	1.43675e-06	DOWN	69	69	69	18.9483	beta caryophyllene	18.9442	19.3114	29	21	7	79664	115849	49290.4	41553	25139	87731.4	131384	194963	141644	106001	71744.2	126630	127492	149449	126430	133446	219745	117966	55714.5	110827	48120.9	52323.4	32778.8	195830	103101	99512	28500.8	33304.2	32776.3	27914	120673	28577.5	27894.4
M85T19	2.07504	3.07504	-2.36986	0.0274388	0.00867545	DOWN	85	85	85	19.0652	beta caryophyllene	19.0455	19.0927	26	15	11	73208	46028.6	45532.2	22182	7288.72	37619.9	23629.6	135476	31667.5	77386	29477.1	21487.5	25027.5	23560.1	105983	21282	186034	22724.3	39145.3	22607.4	12263.6	10297.1	22536	74396.4	20811	23187.4	24352.9	17529.9	38938.1	17233.8	19714.2	18758.8	33128.5
M57T19	2.04898	3.04898	-2.45852	0.022777	0.00734118	DOWN	57	57	57	19.0689	beta caryophyllene	19.0471	19.0977	25	13	12	130256	89433.6	84424.3	43647.9	12485.3	104203	50004.6	259514	43544.9	167750	57985.2	47321.3	50287.5	42362.9	208774	39402.2	330344	37450.8	90328.3	37443	26435.8	19238	40675	132625	42067.7	50348.2	40560.1	49828.7	65204.5	31432.8	45880.2	45646.4	66774.8
M159T19	7.4129	8.4129	5.19528	4.15187e-05	3.7871e-05	UP	159	159	159	19.1901		18.8389	19.2069	22	2	16	34008	5513.74	2999.97	40872.8	31044.4	8443.49	10440.9	5064.11	7013.99	6990.68	4266.87	428.497	7839.23	1141.31	1818.27	2508.69	1832.58	1645.4	5280.36	5596.31	8505.1	9319.84	6582.1	6923.36	5090.36	9057.15	89103.9	85356.4	65071.2	22752.6	13833.6	10927.4	10738.3
M177T19	2.50768	3.50768	7.11314	4.2269e-08	1.00385e-07	UP	177	177	177	19.4188		19.1415	19.7611	28	7	17	14028	8158.42	4021.89	20458.7	6827.87	10015.9	15525.6	4855.29	6809.39	10166.8	5421.38	3122.27	9700.7	5382.37	2689.68	5898.72	9873.91	13438.8	4275.28	10917.3	15568.8	6498.18	4542.35	14014.7	4625.53	7983.9	10207.1	25880.1	26131.6	22989.5	13835	12715.8	18674.9
M72T20_2	1.93098	2.93098	4.61428	4.01382e-05	3.68082e-05	UP	72	72	72	19.5259		19.0571	19.6243	15	3	12	7342	5267.01	3410.31	10170.5	3476.3	6149.04	5618.93	10355.3	4046.08	7018.51	14121.1	3196.57	2932.46	3540.37	9689.04	4249.84	10791.2	6531.49	3406.79	2762.59	1921.79	2523.1	3465.33	4839.41	1248.92	2199.44	13037.5	17999.3	14040.8	10187.1	10641.9	4051.66	12207.8
M43T20	1.63811	2.63811	4.16413	0.000202912	0.000141221	UP	42.9	42.9	43	19.5265		19.5203	19.6165	16	1	15	63176	67343.3	25347.1	110316	39924.2	94035.8	75686.5	92727.2	66249.6	74287.7	137649	44442	49375.2	49966.5	73563.9	82474.2	104677	84231	47828.9	42867.2	42471.2	48865.1	43823.1	64447	43566.1	50974.4	166630	207616	144302	100346	64899	63486.9	114337
M82T20	2.43642	3.43642	5.74423	2.26269e-06	3.08358e-06	UP	82	82	82	19.5297		19.3231	19.6356	39	15	19	109512	59341.1	34088.2	144580	58839.6	140204	68553	92181.8	118681	45273.2	92067.1	30511.7	21181	39785.6	53585.5	56997	90425.9	79719	22212.4	25180.2	20198.7	27421.6	67541.6	24091.7	55592.9	74759.3	217712	266082	197958	142368	61833	47806.5	143209
M56T20_2	2.00728	3.00728	-6.06596	2.30234e-06	3.1296e-06	DOWN	56	56	56	19.6199	beta cyclocitral	19.6119	19.6276	14	13	1	32536	70283.1	24992.4	35014.1	9235.51	57381	81365.4	124310	88818.6	68559.6	96728.9	47251.9	39264	44373.4	77236.1	56469.6	127701	80584.1	59769.5	44669.5	39212.2	57223	81014.7	73514.6	51954.9	78542.8	37948.5	31630.7	40114.4	27546.8	38907.8	27745.2	24792.6
M58T20	1.86675	2.86675	-3.17574	0.00313421	0.001365	DOWN	58	57.9	58	19.6276	beta cyclocitral	19.173	20.1197	27	18	6	17816	19559.1	7218.73	10477.6	10937.1	18020.2	19302.3	35526.2	24290.6	19787.9	28729.7	14032.3	7822.09	14528.2	20240.5	18877.6	27847.9	21337.5	11710.7	29822.3	7355.21	13076.1	19993.5	18215.2	15045.1	25180.9	4505.07	35336	6752.2	4085.15	48666	4247.35	6099.52
M68T20	2.43378	3.43378	-5.95768	4.25774e-06	5.35645e-06	DOWN	68	68	68	19.6277	beta cyclocitral	19.3075	19.6366	24	15	8	54424	72942.9	31759	29971	9159.5	63333.6	78097.6	123093	101920	65651.9	133126	48227	26520.1	41623.7	67840.1	85712.7	94626.9	114055	46995	29721.3	27304.1	56063.8	105853	70241.3	54560.3	97235.9	23888.9	26943.4	38353	39176.7	31982.9	25287.7	16591.5
M110T20	2.99482	3.99482	-8.46151	6.35875e-09	2.25965e-08	DOWN	110	110	110	19.6278	beta cyclocitral	19.6198	20.1578	33	20	9	37136	50520	16996.9	16869.1	6575.85	48239.3	51196.7	80836.7	69744.8	55498.5	87236.4	37038	20323.7	35458.2	42973.8	50524.1	59122.8	62015.5	41851.1	26014.4	35303.5	38317.8	61501.6	46021.1	44160.4	67540.7	15919.9	15988.5	32444.7	9192.93	23866.7	11150.5	8323.93
M174T20	67.1515	68.1515	5.48681	2.26696e-05	2.25563e-05	UP	174	174	174	19.8498	beta cyclocitral	19.8244	19.8663	11	0	11	26824	406.041	239.863	27266.3	22432.4	481.114	711.745	435.872	565.751	615.991	81.5445	167.507	805.764	239.642	514.426	797.558	266.17	560.144	171.069	632.344	506.645	202.179	42.8659	428.016	120.452	180.065	64608.5	62439.7	36211.1	13851.7	8494.83	7564.76	11384.8
M144T20	59.8698	60.8698	5.56785	1.88502e-05	1.945e-05	UP	144	144	144	19.8514	beta cyclocitral	19.8287	20.1119	13	0	13	32712	518.95	518.997	31069.4	25139	1156.04	693.627	783.754	313.663	1494.4	144.757	229.83	782.827	195.389	489.071	2095.06	620.6	61.8736	111.123	266.159	182.526	217.01	147.606	524.547	217.914	170.167	68092.5	72884.7	51921.8	14243.9	5456.32	8108.31	9687.45
M159T20	40.7482	41.7482	6.00062	7.21095e-06	8.54221e-06	UP	159	159	159	19.8532	beta cyclocitral	19.8244	19.8698	20	0	20	85616	2498.54	1475.42	101811	75828.9	3425.27	3570.05	3213.93	2224.8	3882.85	850.587	1643.96	3473.79	3114.41	4472.95	6105.55	3325.12	2419.83	646.915	1962.65	2648.59	988.706	452.658	2623.5	865.959	557.317	218185	216413	162174	64313.6	35239.2	26025.6	39558.8
M89T20	4.16035	5.16035	2.4861	0.0200682	0.00657262	UP	89	88.9	89	20.1042	Ethyl decanoate	20.093	20.3892	30	9	20	278080	25743.3	48610.6	107101	141868	20892.3	17287.2	83262.5	215056	27702.7	75558.7	7966.85	6766.64	8661.21	4576.26	6545.47	5416.3	5230.13	4571.7	7079.02	4626.38	3666.37	2715.75	10646.3	12058.2	10322.8	55594.1	59435.7	50455.4	16805.6	694447	59295.8	97242.9
M157T20	4.16146	5.16146	2.47549	0.0206219	0.00673174	UP	157	157	157	20.108	Ethyl decanoate	20.0924	20.1197	34	13	21	552896	48770.8	90388.9	202958	270738	35245.5	38035.2	149888	403535	53801	138606	12435.2	9028.57	14475	12728.6	10433	11972.3	12153.1	10516.2	11303.2	11162.1	8901.54	8107.92	26598	24066.4	21195.3	101931	112695	93314.2	34292.4	1.32461e+06	112425	179729
M102T20	4.37743	5.37743	2.43641	0.0224987	0.00726333	UP	102	102	102	20.108	Ethyl decanoate	20.1002	20.1197	22	4	18	114032	9613.74	19281.9	42083.5	57947.8	6703.16	7336.22	32643.2	85151.6	9768.45	27974.5	2110.82	1912.8	2773.31	1737.26	2251.92	880.253	1314.49	1855.68	2120.9	1874.32	1366.71	1162.55	4820.5	3570.44	2559.41	19408.3	22547	19918.5	5858.04	281978	22771.7	38334.9
M155T20	4.14852	5.14852	2.43941	0.0223434	0.00721979	UP	155	155	155	20.108	Ethyl decanoate	20.0962	20.1208	27	9	18	590080	51888.3	97098.7	215260	291138	33367.7	40075.5	170604	433601	62869	133356	11112.4	12903.9	16900	13252.2	13856.8	12366.8	12738.1	8964.9	9051.18	15263.7	9966.94	7863.43	23396.9	26449.8	21694.3	104852	123319	97907.4	27123.5	1.42122e+06	118516	189407
M60T20	3.69626	4.69626	2.46642	0.0208781	0.00680499	UP	59.9	59.9	59.9	20.1081	Ethyl decanoate	20.0963	20.5794	28	10	16	425280	45091.4	75277.9	166670	212979	36230.4	36436	134607	340297	42471.3	116705	15057.7	9778.08	16037.8	15426.4	18140.2	17841.9	19636	9447.84	16860.7	17902.4	11403.4	12688.5	20895.5	22065.8	16990.9	87360.9	82702.5	80794	25167.8	1.04365e+06	91656.5	152590
M69T20	2.29201	3.29201	2.12532	0.0435183	0.0132618	UP	69	69	69	20.1082	Ethyl decanoate	19.96	20.1197	21	3	17	307008	60181.7	57554.6	137937	157466	41871.3	43475.2	157291	269410	68842.5	108057	37841.9	30634	21341.5	58660.5	19959	64301.4	21461.9	51211.3	29776.6	30431.1	33907.8	40924.3	60494.9	34148.1	39774.2	73230.5	83799.2	68866.6	29717.5	785155	90791.6	135465
M171T20	4.21167	5.21167	2.23745	0.0345598	0.0106962	UP	171	171	171	20.1118	Ethyl decanoate	20.104	20.1236	14	3	11	95896	7337.06	15610.9	30901.2	45668	3745.42	5276.99	25651.3	68266.3	6538.27	23773.3	1680.95	967.803	1756.02	1454.4	1054.88	788.198	1293.49	819.158	1177.11	1453.54	784.823	214.778	3260.12	2253.65	1867.65	14719.2	17889.1	11323.5	3858.21	219394	14233.6	28936.4
M61T20	4.01075	5.01075	2.18941	0.0384574	0.0118141	UP	60.9	60.9	60.9	20.1119	Ethyl decanoate	20.1002	20.5794	14	3	11	387200	33050.5	64258.8	132557	198113	26381.3	23263.6	87889.1	293177	32396	89719.6	11421.9	8120.59	8199.84	7381.1	8800.04	9981.87	9396.97	5333.51	9446.84	10140	5483.59	4573.42	19437.5	11672.1	11844.4	35829.5	76572.2	59173.7	14150.8	948940	71509	84462
M56T20_1	2.23428	3.23428	2.22045	0.0353833	0.0109286	UP	56	56	56	20.112	Ethyl decanoate	20.104	20.1644	19	4	15	124352	27099.1	24801.9	60547	64420.4	24658	21004.7	66644.8	120175	32284	41751.5	19308	14688.9	9910.37	26354.8	9971.88	29784.3	14449.2	20820.9	16034.2	16249.3	13695.2	16449.9	21008.2	15742.5	18095.2	34613.8	35587.1	38797.3	13443.7	324127	34079.2	62432.5
M143T20	3.72623	4.72623	2.32773	0.0285896	0.00900053	UP	143	143	143	20.1156	Ethyl decanoate	19.8244	20.8546	34	9	18	167552	16206.5	27083.6	60389.1	82657.8	7864.43	7437.99	43661.8	121970	12710.9	42713.5	2004.57	3300.52	1397.85	21889.5	12776.1	18224.5	2332.44	10005.4	1519.32	2259.77	9967.92	1693.68	6228.55	5783.42	4594.93	31174.6	33587.2	29018.2	6140.22	402271	34124	54462.4
M92T20	2.28564	3.28564	4.19137	0.000281421	0.000183476	UP	92	92	92	20.393	Benzene acetaldehyde	20.3813	20.4078	39	18	21	178816	187331	96855.7	428171	244859	360515	476912	319363	237992	253848	215363	160907	115393	138694	87269.3	143130	109153	129549	132414	115001	128908	150197	127413	189842	141552	200531	970820	772739	697343	280632	130161	179127	328593
M91T20	2.56304	3.56304	4.5064	0.000130495	9.73273e-05	UP	91	91	91	20.3952	Benzene acetaldehyde	20.381	20.4083	19	5	14	737216	613765	336995	1.57311e+06	915503	1.23412e+06	1.63578e+06	934224	862789	767649	734508	386845	376379	429268	296045	448686	378163	400214	457509	311751	358005	566542	431906	564266	506815	807606	3.32704e+06	2.73389e+06	2.62325e+06	907494	579638	627987	1.1469e+06
M83T20	2.5909	3.5909	5.7708	6.88844e-06	8.21251e-06	UP	83	83	83	20.4829	Benzene acetaldehyde	19.3114	20.64	83	20	21	184704	110861	37880.1	287230	134834	124119	71124.9	167392	147186	82974.8	110510	71211	117863	88518.4	189493	107616	173467	118221	103839	74478.6	85309.4	93471.7	61898.3	168245	79846.6	91304.3	384120	101202	83975.3	347603	89361.2	371562	313498
M72T20_1	1.58676	2.58676	-3.297	0.00260247	0.001161	DOWN	72	72	72	20.4849	Benzene acetaldehyde	20.108	20.8271	48	19	16	14274	20765.5	9618.43	13086.8	4625.69	34533.7	14010.7	28238.6	28452	17255.6	23308.9	10385.8	30153.3	17860.2	38125	14306.2	36381.2	10153.1	19338.8	11929.1	13485.3	16034.5	8532.02	34513.1	12831.1	16248.2	19523.4	22337.4	16078.2	10893.3	16518.3	8007.59	10469.1
M68T21_1	4.86716	5.86716	30.2664	0	0	UP	68	68	68	20.6234	1-Nonanol	20.1042	20.6361	41	11	21	110872	41953.1	14542.9	204192	19796.7	41969.2	43205.8	68976.5	57779.3	36136	36848.7	37301.4	26473.3	35559.9	43604.9	61737	68340.8	68136.8	42920	27679	29728	27513	22520.7	35503.6	37522.2	31558.5	222323	206610	207597	184135	227645	208218	174657
M82T21_1	3.79286	4.79286	25.9572	0	0	UP	82	82	82	20.6234	1-Nonanol	20.1236	20.6414	49	16	21	64736	32695.7	8844.8	124010	13478	31781.3	38507.7	45889.5	52193	27779.8	26384.7	24451.5	24550.9	22874.7	36783.2	38455.7	41711.8	44023.1	36165.2	27142.4	34028.4	18954.4	32969.9	34792.1	20619.8	26550.6	133745	124977	124863	122890	141601	131846	100668
M43T21_1	4.36238	5.36238	23.1973	0	0	UP	43	43	43	20.6234	1-Nonanol	20.6058	20.6352	22	1	21	238464	109400	39799.8	477244	60798.4	79310.1	126944	192702	107787	97145.7	108868	90314.9	90904.6	60819.9	152222	153167	173661	152012	114885	75423.4	84703.1	52698.6	65913.9	153111	69263	95543	465528	476278	501182	416631	428009	505197	439646
M98T21	4.19727	5.19727	30.8332	0	0	UP	98	97.9	98	20.6235	1-Nonanol	20.1003	21.2053	64	20	21	139776	64284.8	17667.3	269821	24920.4	58197.5	70581.1	92831.2	75075.7	54620.2	55299	50068.3	58834.6	54499.2	83948	98298	89750.7	89988.7	59074.8	51570.6	68144.7	39361.7	39770.8	60495.9	46658.7	52911.9	297737	278756	280381	265195	252593	282704	233711
M44T21	5.45096	6.45096	17.4337	0	0	UP	44	44	44	20.6235	1-Nonanol	20.108	20.6352	26	1	21	24712	9299.88	7824.57	50693.3	7560.58	4304.38	4925.14	14791.3	35809.8	7049.66	6987.6	12705.7	2635.31	4827.04	11453.9	15963.7	21104.7	4373.77	9024.58	1910.62	1587.34	5035.21	6606.17	8294.42	6518.93	9388.25	54745.8	53102.4	52386.2	44927.8	46574.9	54551.5	42213
M55T21_1	4.04455	5.04455	29.7382	0	0	UP	55	55	55	20.6235	1-Nonanol	20.1003	20.6387	46	16	21	370304	180820	51911	731338	67096.4	160125	189714	265488	217695	182203	159552	132666	159329	161178	246441	247871	286586	244242	156465	138634	174186	125409	103861	185632	112305	147648	795710	751599	756489	689507	721511	753391	640202
M96T21_2	3.71064	4.71064	23.5006	0	0	UP	96	96	96	20.6236	1-Nonanol	20.6192	20.6313	16	1	15	18096	9536.5	2973.85	35386.5	4070	11268.2	11969	9846.32	10878	9998.15	7586.03	6390.11	8608.17	7378.11	14558	11261.1	15102.7	13584.8	8646.81	7204.18	6770.4	5297.66	4153.97	12468.4	8462.26	8834.11	33744.3	30890.9	33956.5	34845.6	43341.7	39533.3	30514.5
M42T21	4.80004	5.80004	31.5245	0	0	UP	42	42	42	20.6237	1-Nonanol	20.6157	20.6378	28	8	20	118712	45734.1	12588.8	219526	21903.4	54368.3	47669.5	54786	56540.5	38659.2	47221.5	42823	53383.6	33895.1	57160.5	43399.9	75821	52949.9	37925.9	31645.1	25385.9	23445.8	38704.2	59388.5	35062.3	50180.3	223132	205655	230530	218132	206172	221138	181974
M84T21	3.78116	4.78116	27.7333	0	0	UP	84	83.9	84	20.6237	1-Nonanol	19.96	21.2053	58	21	21	126448	65814.6	19369.1	248856	23229.5	66631.1	68107.9	98890.7	86074.3	67032.2	58686.2	45686.8	62522.7	49523.8	93196.8	78153.4	104487	87161.3	64578.6	51244.8	43104.6	40390.4	42906	69808.5	44704.9	59215.5	272560	256365	256844	241466	230980	253375	216771
M70T21_1	3.80816	4.80816	12.1275	1.78741e-11	1.11494e-10	UP	70	70	70	20.6242	1-Nonanol	20.1003	20.6404	48	21	21	420096	192635	54149.1	733584	197104	200722	243655	307106	227882	210659	218490	134130	170004	153952	240310	259797	272802	229039	172250	148939	119546	122551	118958	179968	156543	158029	751186	705244	727647	670942	644785	715915	616261
M56T21_1	4.10013	5.10013	29.7132	0	0	UP	56	56	56	20.626	1-Nonanol	20.6191	20.6404	42	21	21	400448	189334	53126.8	776293	73296.1	185225	214813	287638	248835	172375	171508	148145	183183	157248	253638	240318	285998	253788	174076	149273	117726	122378	128805	189623	140284	151139	844157	790363	798012	758712	729845	806648	670620
M97T21	4.0406	5.0406	28.0399	0	0	UP	97	96.9	97	20.6274	1-Nonanol	20.6191	20.7936	41	19	21	147456	69640.3	22172.9	281389	26569.7	67451.6	65074.3	110732	85822.2	65790.5	59391.5	53753.1	62345.4	53453.9	101912	91076.8	113799	94651.7	70035.6	55952.1	43646.1	44605	45702.1	78618.2	41474.7	57159	297166	286244	296596	275520	259423	294085	248537
M69T21_1	3.63334	4.63334	28.1532	0	0	UP	69	69	69	20.6274	1-Nonanol	20.6192	20.6369	42	21	21	304448	167327	44430.1	607957	56303.5	177118	176573	246812	211552	149153	140732	130045	152326	129319	215751	199332	259868	210747	180437	136648	120038	107081	116467	186059	112000	155815	656640	626914	639177	577762	607945	627110	524104
M57T21	2.43395	3.43395	11.166	2.89546e-13	2.88906e-12	UP	57	57	57	20.6299	1-Nonanol	20.6058	21.3865	45	17	21	151744	137899	66139.4	335639	47025.6	114912	123735	210522	147321	131117	105763	81397.3	121246	90517.3	275516	126445	327433	121210	152618	95880.5	91435.4	72252.8	72691.4	207196	95725.1	130935	353948	337878	358523	306348	308410	328207	328837
M164T21	36.5739	37.5739	5.55333	1.94956e-05	1.9991e-05	UP	164	164	164	20.719	1-Nonanol	20.6973	20.7328	16	0	16	46088	1278.4	623.26	46756.1	37522.7	1844.98	2150.27	1536.51	1490.81	2135.56	496.466	496.777	2297.06	1382.52	1504.79	1308.13	1832.21	739.846	853.784	1161.55	1793.37	632.76	455.286	1712.8	511.423	509.506	111708	107599	84078.8	26942.6	14246.5	10972.7	18463.6
M159T21_1	26.5193	27.5193	6.50108	2.42685e-06	3.27262e-06	UP	159	159	159	20.8545	1-Nonanol	20.5262	20.8734	34	4	21	181696	9315.69	5196	247045	167494	17021.2	13364.5	9105.26	13105.6	12873.7	3819.55	5875.18	16083	10046.9	13634.8	19348.3	10955.8	9642.7	4647.26	11052.2	9486.51	3659.34	1358.43	5402.26	2203.95	2942.99	490470	506883	374726	138466	97496.9	86929.5	99796.9
M144T21	35.6495	36.6495	6.20232	4.63604e-06	5.78643e-06	UP	144	144	144	20.8576	1-Nonanol	20.5794	20.8695	20	0	19	70528	2529.41	1489.56	90172.2	64737.6	4197.64	4912.03	3580.95	4893.43	2970.01	521.33	1527.4	3588.78	2152.73	4067.65	4790.31	2640.55	1859.54	1622.72	2749.87	2439.63	833.137	309.744	1676.39	807.479	976.321	182454	190039	141052	53558.7	34888.4	22597.5	31344
M174T21	38.5737	39.5737	6.09923	5.80378e-06	7.07195e-06	UP	174	174	174	20.8615	1-Nonanol	20.8345	20.8734	16	0	16	58576	1852.68	1184.25	71464.6	52288.6	2918.38	3309.45	2286.13	2733.96	3270.67	604.923	1291.34	2159.53	2338.08	3451.11	4235.32	1795.16	2138.71	553.55	1668.79	1773.74	458.001	430.657	713.571	462.056	313.051	153608	155213	110640	41882.2	30896.4	22560.6	28300.5
M82T21_2	2.76298	3.76298	6.91591	4.21617e-07	7.11961e-07	UP	82	82	82	21.2054		21.2004	21.2322	27	7	20	64528	23058	7665.05	63708.8	25822.1	29498.2	25163.4	32595.7	34068.9	30096.8	23775.8	17803.4	11217.7	16621	23522.2	16917.3	39387.3	28856.9	25075.1	12028.9	21290.4	21662.7	15444.8	27138.2	13271.9	18781.3	51378.8	63895.7	61130.7	49072.9	164449	73557.3	44654.6
M55T21_2	1.79085	2.79085	4.59491	7.2037e-05	5.96465e-05	UP	55	55	55	21.2073		21.1975	21.221	16	2	14	117312	72230.2	26412.5	129353	50477.1	97731.2	92595.1	112063	92778.9	89153	76574.8	48816.7	50577.7	40900.1	100527	62451.5	133528	60832.9	62197.5	40431.8	48536.8	55307.2	58602.4	88854	35366.6	69006.9	133058	129620	108201	94445	321489	148396	180525
M96T21_1	2.56091	3.56091	6.32356	1.52021e-06	2.17885e-06	UP	96	96	96	21.2092		21.2014	21.2248	21	4	17	34216	12635.5	4373.77	32358.3	13607.2	14944.2	17305.6	19376	20960.1	17905	12825.5	10351.2	7994.55	7916.07	15924	9523.57	18905.2	13409	11142.2	6032.33	8605.47	9849.03	9743.15	13768.7	8114.13	10749.9	27702	30246.4	31230.5	22681.2	86210.3	37713.2	22688.7
M68T21_2	3.11301	4.11301	7.14969	2.54169e-07	4.48862e-07	UP	68	68	68	21.2131		21.2004	21.5131	31	10	20	111400	32260.3	12211.8	100427	41949.7	44801.8	50353.5	39678.7	51991.4	38152.8	34307.8	26135.7	14498.3	24009.1	33416.4	35470.3	51900.3	38434.4	23162.5	10718.1	35251.9	28942.3	24046.4	38708.2	16167.3	17318.6	90506	99385.6	92265.3	76575	266606	118160	69455.6
M95T21	2.25317	3.25317	5.89723	3.16917e-06	4.08021e-06	UP	95	95	95	21.2171		21.2052	21.2365	24	8	16	61048	25863	9248.59	58273.6	23425.8	25781.8	34083.8	41548.3	37843.5	36101.3	28739.2	20145.8	21589.1	18428.9	31949	23710.6	43552.6	29028.2	21382.1	12467.4	16423.3	17732.1	12732.6	30918.5	15268.3	23695.9	57204.9	57076.3	52904.2	46106.8	150001	58390.3	44069.7
M81T21	1.61151	2.61151	2.3661	0.0230877	0.00742777	UP	81	80.9	81	21.2209		21.1975	21.9044	39	11	18	103240	60745.3	55418.9	97891.8	45876.8	35325.1	183123	174517	55200.1	103890	43589.5	24682.2	22499.4	22350.9	32219.4	29163.6	52248.8	52544.9	31429.9	20623.7	103918	28478.9	29271.3	184314	19938.3	26323.6	51470.4	77649.4	164876	70846.6	259432	107037	63941.9
M71T21	1.61288	2.61288	-3.82287	0.000519183	0.0003018	DOWN	71	71	71	21.2727		21.0676	21.615	34	16	12	197312	301776	114068	187105	76706.4	366691	204196	471592	408492	258437	284259	252468	279940	305542	479872	343414	447268	183506	340750	205001	143973	239368	140904	534934	210557	236143	169283	345998	218277	169979	236086	152729	247869
M43T21_2	1.5807	2.5807	-3.46504	0.00152859	0.000719644	DOWN	43	42.9	43	21.2756		21.2483	21.5191	15	11	3	114912	173980	73158	110065	42343.6	224443	100536	359463	209881	156974	183788	133329	110524	170064	272792	212724	276103	93097.2	159328	111484	125812	158986	82450.4	263120	100099	148586	114771	181305	145113	117800	135925	83043.6	108400
M136T22	2.00385	3.00385	4.43757	7.40776e-05	6.10134e-05	UP	136	136	136	21.5099		21.5027	21.5275	22	8	14	24120	15587.2	10224.4	31234.5	12512.4	14169.5	20173.4	8397.43	13823.2	16787.2	8313.62	10886.4	7473.13	11846	24537.9	32763.5	31082.3	46117.4	10948.1	5674.98	12369	11872.4	9872.59	13962	5057.32	11203.8	29647.2	36268.6	29876.7	28207.8	17576.2	27995.2	32221.5
M121T22	1.96614	2.96614	4.70236	3.15178e-05	2.99051e-05	UP	121	121	121	21.5113		21.5021	21.5317	19	6	13	27576	20415.7	12611.2	40140.1	14506.6	17230.4	30061.2	11719.9	13033	22191.9	11954.4	11792.2	8614.64	16045.4	34553.2	34305.3	41804.2	57730.6	14288.3	9225.66	18300.2	14755.1	16117.6	14418.1	8540.33	22048.3	34313.7	44777.6	36309.3	42208.4	26749.9	34265.4	41981.9
M94T22	25.1785	26.1785	14.9872	2.10032e-12	1.58755e-11	UP	94	94	94	21.6892		21.6699	21.6973	12	0	12	28600	1726.8	870.303	43478.1	12736.5	2725.68	2339.93	2533.59	3452.14	1951.31	951.749	2286.83	1127.86	1198.03	1107.09	1586.93	3429.89	1155.37	2292.16	1721.56	936.649	476.55	930.626	2299.7	814.317	944.772	52082.6	71850.3	52540.6	48772.3	35930.1	19857.4	64183.9
M159T22	41.8754	42.8754	5.41908	2.64122e-05	2.55862e-05	UP	159	159	159	21.8014		21.7834	22.0111	16	0	16	60880	1890.7	719.311	79173.7	65349.4	2008.92	2023.96	1848.64	2756.85	2009.64	1374.44	1133.77	1980.35	1834.58	3221.06	3312.6	2395.44	2835.14	1245.65	1307.12	2084.11	713.582	825.067	1923.93	1313.63	1556.18	191538	183958	143827	51698.4	25430.1	15447.7	35963.5
M82T22	3.7254	4.7254	8.07978	1.59661e-08	4.7891e-08	UP	82	82	82	21.871		21.613	22.4315	30	3	19	35384	12604.3	6947.02	46955.9	18202.5	9532.41	28343	22889.8	18660.2	11738.1	7176.11	8888.67	4099.31	9340.1	15716.7	13080	22989.3	11158.9	6331.23	18767.2	5016.09	4267.3	8955.34	11569.1	6032.51	20137.8	32971.8	38686.9	35092.6	38352.5	120069	55040.6	53217.1
M68T22	4.78302	5.78302	10.1198	3.78641e-10	1.64262e-09	UP	68	68	68	21.8747		21.8683	21.9045	14	0	14	34344	9967.5	5209.67	47674.8	16260.9	12102.3	9988.67	23631.6	14557.6	7823.05	7240.73	7835.03	8417	12630.5	12536.9	15256.1	20300.1	9301.53	6755.12	4188.28	5785.96	4072.98	4963.74	10784.6	4490.39	6655.34	40244.3	37717.4	32518.3	47435.7	112986	53406	55426.8
M95T22	2.64415	3.64415	4.134	0.000204681	0.000142225	UP	95	95	95	21.8758		21.6187	22.4251	14	1	12	28144	12617.9	13208.3	33363.8	18825.5	9003.69	11792.5	24586.1	9630.53	11688.7	9040.05	11841.3	4062.95	10141.6	19577.9	10546.2	66110.1	11621	8951.6	5047.9	4117.43	4116.07	8103.55	12308.8	6175.96	6512.78	26631.6	25483.5	19179.4	29806.5	109671	41725.8	42417.5
M47T22	2.68643	3.68643	4.07105	0.000414556	0.000252906	UP	46.9	46.9	46.9	21.9858		21.9742	21.9956	31	12	19	48592	18359.2	11624.5	49320.8	32856.1	40716.9	44571.8	39824.9	24587.7	31514.9	26107.8	15933.4	10425.9	10056.1	13367.2	13659.8	8056.54	8331.74	13092.9	10088.3	10052.8	13284.3	9372.96	18614.4	7618.82	16263.5	120228	94337.4	102514	25807	14541.6	18025.7	24122.9
M193T22	1.69771	2.69771	-3.45171	0.00133566	0.000638504	DOWN	193	193	193	22.4274	Ethyl hexanoate	21.9144	22.4358	20	15	5	15570	21932.8	8104.03	12919	8805.2	29517.9	16566.1	35361.2	22665.5	14436.8	20085.4	15123.1	21751	10356.5	34960.5	24085.8	33452.1	14620.4	19620	16110.9	31366.3	31239.9	10936.6	26736.7	13384.4	18211.6	7714.27	15448.3	12128.3	9376.5	32045.9	7686.76	16382.2
M89T22	3.71785	4.71785	2.72175	0.0120799	0.00425133	UP	89	88.9	89	22.4317	Ethyl hexanoate	21.6622	22.4429	16	4	11	45928	5194.25	6585.03	19311.4	22838.6	2119.66	4669.51	14007.3	24746.5	5871.85	13492.5	1689.11	1593.4	1230.55	897.519	1193.27	1446.45	1070.62	1282.33	1489.56	607.566	956.72	14767.4	1572.53	2658.04	11716.9	9656.05	9488.55	8200.73	1351.37	106489	9566.08	19075.5
M71T23	1.87559	2.87559	-3.55186	0.00138294	0.000658302	DOWN	71	71	71	22.56	Ethyl hexanoate	22.4276	22.5772	26	15	9	37696	63418.6	34790.5	33812.6	15769	75236.7	54394.5	134111	96071.6	91410.5	56830.2	35526	53516.7	38981.1	102482	38519.2	125522	27109.3	91289.4	31591.7	26216.4	23619.9	32893.4	103428	31683.5	61357.7	33816.7	44006	43332.2	22752.6	51362.2	26159.3	62625.1
M157T23	2.39607	3.39607	5.3932	1.0585e-05	1.18752e-05	UP	157	157	157	22.5877	TDN	22.4276	23.134	44	17	21	73512	43725.8	20317.2	104770	47724.2	57032.2	55131.6	34525.3	44500.9	57284	34339.9	31824.6	61240.4	40445	71090	96631.4	68494	48821.1	28960.8	44491	33416.5	18966.8	10487	31875.4	22055.1	26629.4	169044	146889	156590	206303	89978.2	43406.3	81807.4
M172T23	2.49509	3.49509	4.94285	4.06311e-05	3.7189e-05	UP	172	172	172	22.5893	TDN	22.5754	22.5997	18	7	11	19656	10024.1	4914.82	25011	12996.3	12296.2	16440.1	6967.52	12027.1	13760.9	6816.06	7497.27	12474.9	5915.89	15126.9	21627	17034.7	12400.2	6040.18	9388.71	6292.54	5197.45	2574.56	9923.98	4408.12	6295.54	41768.6	33963	41627.8	52760.7	17439.6	9636.92	17322.3
M190T23	1.69259	2.69259	4.35664	0.000138038	0.000102029	UP	190	190	190	22.9217		22.9002	22.9394	26	12	14	21368	20314.5	6960.99	34384.2	13060.1	20225.9	23734.4	17053.2	20427.6	26879.4	8756.55	20859.3	17718	28985.7	28842.4	26438.8	25228.8	32799.2	13861.4	20555.6	15187.4	11482.9	9994.08	25346.8	9614.61	22613.2	53868.4	47789.9	43746.8	42824.9	24838.1	19573.8	31908.4
M69T23	1.82025	2.82025	5.14676	1.05723e-05	1.18633e-05	UP	69	69	69	22.9275		22.4315	23.0412	35	14	16	187136	213366	85796.2	388378	130082	209866	303761	241296	216020	231825	140839	194169	179532	194362	309959	269693	497954	223551	203852	163356	157961	118561	131249	238687	115755	138429	443627	347039	508560	345147	296280	304298	417473
M122T23	2.07411	3.07411	7.09166	7.67518e-08	1.5629e-07	UP	122	122	122	22.932		22.8988	23.3413	16	4	11	12453	9435.91	2935.86	19571.1	5854.37	9769.49	10871.6	8715.14	12654.9	10373.1	5376.01	8844.72	7654.52	9532.28	16570.1	13321.9	12515.1	11489.9	8374.7	6243.24	8961.27	4829.66	6394.93	9625	5500.82	10535.8	25013.9	23803.9	29286.4	23792.7	16819.2	16255.2	26854.5
M121T23	1.57642	2.57642	4.13404	0.000263731	0.000174168	UP	121	120.9	121	22.9431		22.3508	23.5471	79	19	21	89816	107843	31690.7	170006	61188.4	96537.3	126910	95768.3	113120	134834	59624.3	102176	96386.5	136814	150139	151891	154939	145541	80029.4	107508	93751.7	60526.8	59451.4	121850	61108.6	115798	244066	226946	245092	197446	128607	125886	160872
M68T23	2.00231	3.00231	5.59806	1.75606e-06	2.47448e-06	UP	68	67.9	68	23.0329		22.4798	23.0511	20	7	12	106176	60723.7	34084.7	121588	36339.8	137411	78650.6	63253.4	95357	61882.5	62212.5	87384.6	33162.8	44429.9	45756.5	106514	64992.6	23825.6	43345	38618.6	24176.1	19637	21141.4	50681.7	44025.2	128740	108884	113383	69804.6	77852.9	96125.1	97555.2	99198.8
M96T23	2.5967	3.5967	9.59258	1.14184e-11	7.50204e-11	UP	96	96	96	23.0368		23.0299	23.0632	20	1	19	18928	12369.7	5803.38	32120.3	7439.44	13057.9	26367.3	19694.4	15377.8	16986.9	8445.06	9269.61	10853.7	9369.38	18607.8	11739.8	20441.9	12019.5	9700.25	5903.05	4425.18	5106.49	7157.79	18007.5	8223.57	9008.24	30550.3	28660.5	27267.1	25718.8	22512.2	30046.3	29797.1
M82T23	3.12824	4.12824	9.63158	4.18556e-11	2.30016e-10	UP	82	82	82	23.0368		22.9197	23.0632	27	6	21	98800	50577.5	26539.7	158219	43801.1	68270.1	125982	88351.7	73475.8	48671.2	42496.6	25257	30999.8	47138.9	69718.4	64877.1	76824.7	59810	35152.8	23336.8	31502.2	23051.3	27597.2	42770.3	25721.6	31121.9	107724	138313	83584.5	133300	147012	217575	147219
M67T23	4.37975	5.37975	10.1796	3.45479e-11	1.96418e-10	UP	67	67	67	23.0368		22.7244	23.0451	14	1	12	106760	34456	23698.9	150909	46761.5	44138.5	120529	39156.3	57145.7	33166.1	27290.9	27796.4	21537.8	26044.9	36279.7	41350.2	55671.6	41036	17070.4	16018.4	14292.2	12612.1	14397.1	36704.5	20028.9	21309.9	88462.7	128930	99873	78767.1	157843	191685	121181
M81T23	3.80245	4.80245	8.00337	1.20137e-08	3.85054e-08	UP	81	81	81	23.0369		22.5721	23.0491	24	4	18	107008	39271.1	25271.2	149327	57726.4	33888.4	119940	83751.3	55846.9	44268.7	37934.3	26735.5	17767	46572.8	36801.5	35262.6	55552.5	50194.2	25294.3	14057.7	16777.2	21091.4	17763	40693.4	13161.7	31339.3	114416	139446	112416	81500.8	97246.8	158094	134289
M95T23	4.71326	5.71326	9.97014	1.5613e-10	7.08113e-10	UP	95	95	95	23.037		23.0308	23.0632	26	5	21	91552	28377.4	18851.6	133750	44613	33094.7	94471.7	38760.5	38937.8	29466.3	20631.9	24886.5	16954	22294.7	31780.9	23862.7	52510.9	42836	15777.3	16503.4	13315.2	12629	9507.25	24218.5	14038.9	19448.1	85592.4	111375	83942.6	80655	77410.8	140948	121392
M109T23	4.02994	5.02994	9.82384	7.00922e-11	3.41157e-10	UP	109	109	109	23.0371		22.4171	23.0632	23	2	20	37688	13750.1	8917.34	55411.9	17267.6	13933.6	41034.8	17386.6	17816.9	9521	11514	8021.47	9318.59	11629.4	18118.6	14558.9	30320.1	16238.4	8954.13	4801.6	5783.72	6424.41	3921.57	13091.7	5502.66	20858.8	29802.4	47948.6	33627	36826.1	55868.9	58634	45748.3
M110T23	3.09901	4.09901	6.59204	7.46773e-08	1.53367e-07	UP	110	110	110	23.0373		22.4292	23.5234	25	2	17	13631	6369.86	6151.51	19740.3	6967.8	7702.02	16434.7	7062.38	8260.5	5544.49	3670.49	3874.42	2493.08	3130.48	28954.6	3424.97	8851.92	5833.19	4314.1	2883.78	2464.21	1564.64	4716.69	7015.08	2006.22	3565.15	13282.7	13474.3	10957.1	8968.75	12722.6	20477.5	24653
M123T23	5.00259	6.00259	10.1348	2.40592e-10	1.06693e-09	UP	123	123	123	23.0394		23.0332	23.0632	24	4	20	48736	13703.1	8354.42	68551.2	23350.6	19167	40931.2	19285.9	23096	12873.5	10407.5	11197.9	7287.79	11835.6	15012.1	14010.1	20575.6	21867.8	10149.5	5381.67	7157.18	6470.09	7227.92	10327.8	6491.78	7011.77	42287.6	59472.7	37888.7	43598.9	41372.9	75004.1	55967.6
M91T23	2.64423	3.64423	3.86057	0.00083426	0.000427977	UP	91	91	91	23.2204		22.9237	23.5562	38	7	18	364224	134701	60512.9	356181	255842	218625	275533	220024	224492	196347	186125	92655	89083.4	121920	95644.1	60374	114069	59511.6	107015	106204	113279	113249	114201	144600	91895	83881.6	909083	662002	765137	50786.9	167238	147968	249245
M149T23	3.2	4.2	5.7349	7.69868e-06	9.03724e-06	UP	149	149	149	23.2242		22.8934	23.5583	44	6	18	24512	9105.91	4232.18	29138.9	15438.1	13540.7	19333.1	15453.8	13095.1	14510.6	13769.3	9053	4345.21	8088.46	5716.21	4325.69	6449.08	4658.22	7408.13	7741.99	8606.79	7637.58	5208.77	10063.9	6701.21	5517.36	64761.3	49844	53676.3	27574.2	15770.5	15695.5	24467.7
M148T23	2.55109	3.55109	4.17618	0.000352633	0.00022162	UP	148	148	148	23.2373		23.1984	23.5598	69	19	21	207104	85108.5	40602	217119	139051	153101	163300	159480	127669	112674	138557	78557.9	43806.9	78611.9	41516.7	50203.9	59033.1	37150.2	62188.4	55694.5	73629	80069.3	65881.4	89217.9	54503.4	62432.5	524957	378256	438498	154302	79312.2	90639.7	134454
M146T23	206.584	207.584	12.5512	6.11529e-11	3.08823e-10	UP	146	146	146	23.2457		23.2199	23.2684	20	0	20	40464	257.278	139.142	53149.5	19311.1	536.562	319.889	482.031	337.205	215.598	347.909	53.7662	49.523	104.265	179.11	463.633	287.323	160.148	287.729	205.571	108.147	387.821	245.089	330.26	138.175	163.086	55940	52446.2	57481.3	106173	70894.1	36114.1	80673.2
M53T23	10.6946	11.6946	8.42789	3.80574e-08	9.28238e-08	UP	52.9	52.9	52.9	23.33	methyl salicylate	22.9184	23.8103	23	2	20	60280	6892.62	5097.32	73713.9	35974	9252.24	5406.84	6621.84	5047.63	7714.44	5547.82	3645.31	6350.1	4210.27	23699.3	7219.57	18225	4595.22	6947.12	4111.03	3714.79	2410.38	2800.16	7592.24	2838.79	6794.83	30919.9	57358.5	25712.5	71518.9	35265.3	55285.3	79598.3
M152T23	14.3415	15.3415	7.97795	1.02411e-07	2.0305e-07	UP	151.9	151.9	151.9	23.3323	methyl salicylate	22.9939	23.3411	45	15	21	628416	49913.4	42172.8	715831	380175	40749.2	154255	29255.9	28101.3	36132.3	26341.3	26757.3	127256	25616.3	15961.7	92581.8	29143.6	30017.4	75577.2	58606	18183.6	10886.2	16669.9	28995.7	42444.5	134648	212626	554084	221262	637657	319909	528395	745483
M120T23	28.5233	29.5233	8.67707	3.2341e-08	8.25758e-08	UP	119.9	119.9	120	23.3335	methyl salicylate	22.9167	23.5586	38	8	21	1263616	52171.8	12929.6	1.48811e+06	758246	64845	60244.4	58336.7	55040.2	59237.1	48591.7	59315.2	37160.3	50087.5	39817.6	51609	70180.5	33562.4	58751.2	49844.2	33989.9	24548.8	54860.6	79376.2	50545.4	55664.3	369273	1.32819e+06	441698	1.4235e+06	661934	1.08671e+06	1.48518e+06
M92T23	32.2059	33.2059	8.39863	5.43825e-08	1.21891e-07	UP	92	91.9	92	23.3335	methyl salicylate	22.9352	23.5599	82	17	21	720384	25419.8	6130.86	818665	432778	28443.9	29551.8	39709.4	26616.9	22383.8	27425	29696.9	25326.6	25581	19656.2	23309.5	35834.1	22161.2	28446.6	26708.4	20402.2	16916.9	19536.3	32140.5	16215.6	17752.2	233743	630126	238547	724653	363660	623035	821923
M165T23	12.3536	13.3536	9.45441	6.9612e-09	2.44541e-08	UP	165	165	165	23.3671	methyl salicylate	23.3614	23.3724	12	0	12	34104	2730.68	1337.45	33733.8	14967.6	3800.29	2893.02	1212.45	2390	3450.38	1539.28	2140.23	2580.91	1780.99	3701.99	5525.13	5340.57	2462.71	4139.59	3819.59	2506.26	1054.96	1517.62	3332.52	1002.11	1153.7	36718.8	36265	30859.8	19720.6	25821.7	26128.1	33193.8
M109T24	5.20908	6.20908	15.4638	3.10862e-15	3.95968e-14	UP	109	109	109	23.5093	Nerol	23.4891	24.04	19	1	18	26648	9342.94	4828.75	48668.1	10606.3	13391	10015.9	15128.5	9054.85	7741.64	7931.65	9100.33	4931.2	6871.77	18742.7	14301.5	21961.4	7597.72	8549.58	3319.6	6356.61	5240.02	6181.05	9509.78	4023.71	6251.17	33570.1	39466.7	35260.6	35205.4	36059	53356.2	57884.3
M69T24	4.87287	5.87287	17.0002	4.44089e-16	6.81703e-15	UP	69	69	69	23.5273	Nerol	23.4891	24.2512	63	16	21	188032	72843	30843.1	354954	69510.3	86466.8	81513.7	131879	70606	102317	59421.5	77018.1	48438.9	68563.6	132031	104067	115265	68213.7	57290.4	33063.5	46554.2	43176.6	31366.3	81338.5	27971.2	63141	278861	316208	254962	262709	255096	414260	385506
M95T24	4.01396	5.01396	11.9957	6.63913e-14	7.57705e-13	UP	95	95	95	23.5758	Nerol	23.5531	23.5968	11	0	11	17832	9625.46	6123.02	38636.2	9237.6	9364	5980.54	22828.4	9496.78	15741.5	6683.36	4307.76	7459.32	4055.59	19710.4	8686.06	22110.3	8578.05	12308.4	4401.18	4329.44	5167.09	4724.04	16189.7	4601.31	5411.49	30865.5	25358.7	30065.5	39303.1	45684.5	28335.6	35520
M94T24	14.852	15.852	11.7688	1.36856e-10	6.30323e-10	UP	94	94	94	23.5796	Nerol	23.5531	23.5947	13	0	13	37096	3641.77	2283.71	54087.3	19509.5	7459.09	6802.23	4912.38	5719.98	7253.83	4670.59	2425.96	2187.05	2003.25	4440.47	3942.62	6093.97	6598.54	1960.36	1368.87	1864.69	1102.2	1270.95	897.187	1898.4	1604.5	35012.2	43187.8	43458.9	46257.9	55035.7	38510.3	40540.2
M137T24	19.8032	20.8032	13.1248	2.12692e-11	1.29234e-10	UP	137	136.9	137	23.6855	Nerol	23.357	23.6969	14	0	14	23384	1523.87	951.64	30177.6	9959.22	1880.4	1533.72	3216.01	986.984	2665.51	1168.12	994.894	1624.82	550.018	2773.75	1030.03	4136.63	700.614	1684.48	1141.11	868.999	694.607	574.774	1454.45	715.313	1606.1	35189	30483.1	39831.9	53104.4	39903.5	20962.8	48071
M70T24_2	1.56784	2.56784	-4.09207	0.000372219	0.000231718	DOWN	70	70	70	23.7869		23.4855	23.81	25	14	11	17368	46851.4	17735.6	29882.8	6822.34	57680.9	43419.9	84800.2	55523.7	55836	53576.5	42897.6	50847.1	38108.7	64032	43056.5	73270.2	30496.2	56881.5	29548.3	25623.1	21116.7	19365.8	69970.9	33979.8	33847.1	28182.3	28393.9	25833.4	27299.9	40557.1	35932.1	44885.9
M112T24	2.07501	3.07501	-5.00035	2.11545e-05	2.1351e-05	DOWN	112	112	112	23.7985		23.5015	23.8212	27	13	10	20168	33250.8	13816.7	16024.4	7637.54	43635.5	24511.9	54377.3	40286.2	51741.7	48511	37240.6	34364.6	21635.7	36055	31674.1	48612.1	16085.9	43648.1	21561.5	15570.1	11682.5	12542.7	50591.7	22544.3	31393.7	17684.5	20364.5	16180.6	11281.7	32319.7	22927.7	26545.7
M141T24	1.71349	2.71349	-4.02406	0.000273799	0.000179435	DOWN	141	141	141	23.8061		23.7913	24.4114	23	11	10	13791	21150.6	8075.91	12343.6	5947.07	31341.1	16985.6	31568.2	21915.2	30069.4	27071.5	21143.7	27360.9	17333.5	26786	18030.9	32221.3	8908.57	25916.9	14328.4	12004.8	7822.1	11485.9	31097.8	16620.4	14149.8	14583.6	11858	11137.1	6024.51	13349	13667.3	20967
M120T24	1.56623	2.56623	3.9296	0.000458509	0.000274024	UP	120	119.9	120	24.2432	Beta Damascenone	24.0709	24.2572	82	21	21	258176	239127	73366	374529	139823	242080	278341	198003	254790	304557	124498	213088	234480	286640	320033	364212	329947	337450	196142	241942	196061	136244	107180	272437	135278	248269	554642	507881	556057	433296	254353	252971	362249
M104T24	2.69117	3.69117	1.31744	0.202094	0.052734	UP	104	104	104	24.245	Beta Damascenone	24.1898	24.2551	22	10	12	410240	33183.4	25466.1	89302	193535	48988.7	33324.3	133362	37993.1	42180.9	12941.4	17275.4	22342.9	26790.6	35541.9	33540.9	32515.5	32965.9	23575.2	26114.6	47942.9	14139	11364.7	27191	12044	24715.6	56103.3	53253.9	54981.7	39205.6	60427.1	28517.5	26919.1
M92T24	2.07619	3.07619	4.93308	5.1266e-05	4.50636e-05	UP	92	91.9	92	24.2471	Beta Damascenone	24.0717	25.0596	49	21	16	59472	32103	9298.5	66651.9	30717.6	32145.7	38467.3	30651.4	36135.9	39702.9	18191.8	28370	32551.1	37782.7	42035.3	48222.8	42765.9	43571.2	26160.1	31529.4	26958.4	19584.7	14109.7	34985.9	17356.3	32884.6	72697.9	68414.4	72838.3	56946.6	100790	35308.5	48706.7
M122T24	1.5516	2.5516	3.82279	0.000604339	0.000338627	UP	122	122	122	24.2473	Beta Damascenone	24.2431	24.2545	41	20	21	149376	139967	43786.5	217173	81537.8	143437	167005	118915	150655	180078	73015.3	131969	139621	169429	186955	212415	197828	198230	114940	141393	117397	75144.6	61888.4	158730	79393.2	120864	323812	294709	325977	251701	145059	148161	207103
M107T24	1.77795	2.77795	4.58818	8.44316e-05	6.77327e-05	UP	107	107	107	24.2476	Beta Damascenone	24.2434	24.2587	31	12	19	35848	31756.1	10347.3	56460.6	22400	30996.2	28285.7	30140.4	39170.3	40165.8	17079.7	27750.8	30979.1	42698.3	47142.3	33910.5	42442.6	50167.1	19193.6	32176.9	25615.2	19482	11921.4	41268.9	21154.5	35135.9	82377.3	73621.8	73404.4	74722	51157.1	35447.5	54050.9
M80T24	1.6579	2.6579	4.11753	0.000288158	0.00018705	UP	80	80	80	24.2507	Beta Damascenone	24.2432	24.2582	27	9	18	22048	17819.4	5762.79	29542.7	11705.8	21259.7	18057.7	18476.9	19456.9	21983.2	9838.95	19635.5	19921.8	23190.9	21929.4	26915.8	27372.9	19331.4	15359.3	20647.2	16598.9	11311.1	6413.16	17775.7	7434.97	11295.3	45457.1	39805.2	39926.8	30809	21708.6	19262.5	23373.9
M176T24	1.57364	2.57364	3.47988	0.00159266	0.000746221	UP	176	176	176	24.2507	Beta Damascenone	24.2434	24.2536	24	11	13	22240	17934.9	6021.92	28223.2	12136.5	19751.4	22807.2	14893.6	22407.5	24185.6	8733.07	17282.4	14255.5	21753.3	22223.4	27478.5	21562.4	29130.3	14950.9	13695.9	16142.6	11787.4	7279.24	20817.1	9199.25	16296.6	43694.2	41222.9	41959.3	27623.7	18972	19501.7	27703.3
M106T24	1.55132	2.55132	3.77767	0.000698783	0.000376762	UP	106	106	106	24.2507	Beta Damascenone	24.2431	24.2545	41	20	21	116336	108015	33320.1	167566	64096.5	107612	125148	89169.2	119447	139731	58145.3	99497.7	103042	132781	143285	163157	148175	151981	90312.6	108061	88265.3	62476.3	41615.8	122025	63302.2	111087	245321	219844	252073	195450	113511	108672	162585
M121T24	1.54105	2.54105	3.79208	0.000671869	0.000366191	UP	121	120.9	121	24.2508	Beta Damascenone	23.9045	24.2545	55	21	21	1570304	1.47079e+06	443627	2.26656e+06	853215	1.47787e+06	1.71339e+06	1.23581e+06	1.60152e+06	1.86615e+06	780861	1.36987e+06	1.44212e+06	1.78797e+06	1.93551e+06	2.2191e+06	2.01548e+06	2.06086e+06	1.21499e+06	1.47044e+06	1.19699e+06	835090	658146	1.65193e+06	837910	1.51453e+06	3.34767e+06	3.04915e+06	3.37735e+06	2.61952e+06	1.49586e+06	1.52547e+06	2.1852e+06
M93T24	1.65215	2.65215	3.81266	0.000688429	0.000372722	UP	93	93	93	24.2508	Beta Damascenone	23.7944	24.2549	28	11	17	77968	64623.9	21220	106768	45996	66984.4	79929.1	52360.7	77829.3	84713.5	40875.3	55971.1	69060	72545.3	83689	86836.4	102177	85388.4	57098.5	65644	56636.4	29325.6	26576.4	84611.6	31255.2	47594.8	165180	141500	158951	126027	83234	63688.1	105360
M105T24	1.58001	2.58001	3.8378	0.000616742	0.000343804	UP	105	105	105	24.2508	Beta Damascenone	24.2431	24.2545	42	21	21	538304	497168	151925	785531	308994	495457	572979	432305	512634	637068	252537	470100	501112	616715	668451	730210	688090	700924	379279	498680	414407	292888	225163	559779	264627	527118	1.15551e+06	1.05283e+06	1.16163e+06	869544	535625	521507	753665
M78T24	1.61549	2.61549	3.52349	0.00145449	0.000688583	UP	78	78	78	24.2509	Beta Damascenone	24.2358	24.2551	38	18	20	66928	60823.6	20859.3	98260.1	43994.4	55793.8	73234.4	60713.8	66587.3	80001.3	30830.4	57566.6	59093.3	76210.7	84273.2	96618.5	88885.9	86904.4	39827.8	61999.3	48241.8	36700.6	21356.4	64057.6	30602.2	57797.1	143143	127069	143799	112253	60620.7	65632.1	91919.1
M119T24	1.56957	2.56957	3.83998	0.000591867	0.000333366	UP	119	118.9	119	24.2509	Beta Damascenone	24.088	24.2545	43	21	21	146112	135129	42202.2	212095	81580	142605	161325	118672	147992	176176	70027.3	124945	134378	169310	177931	202025	185058	187480	109478	131856	105842	74275	58347	149851	69316.2	140830	311412	288748	317516	245141	160627	135735	201575
M91T24	1.56474	2.56474	3.5532	0.00134057	0.000640429	UP	91	91	91	24.2509	Beta Damascenone	24.2395	24.6741	41	19	21	365120	345531	108408	540668	227123	355516	409292	299952	374973	426987	159048	332003	343192	422835	462174	529629	471131	483772	282076	343483	253238	199305	151080	401804	194363	360300	776752	702458	805031	613496	333381	362710	517521
M149T24	1.53425	2.53425	3.53821	0.00133179	0.000636985	UP	149	149	149	24.2511	Beta Damascenone	24.2434	24.2594	29	12	17	38216	38135.8	12160.5	58509.7	23418.6	30840.3	44137.6	31324.1	40015.8	48115.1	24178.6	39744.7	47459.5	41510.9	40723.5	56051.7	56078.3	51864.3	25314.6	39893.8	28246.4	24597.8	15030.6	55954.8	21256.3	38513.6	93748.4	75660.2	85407.9	69810.2	47832.6	41946.2	56809.9
M175T24	1.54403	2.54403	3.77816	0.000697623	0.00037631	UP	175	175	175	24.2512	Beta Damascenone	24.2431	24.2572	42	21	21	174976	161896	49293.3	249972	94776.6	164518	183405	137158	174970	206600	82890.9	154315	158509	199295	213610	245431	223983	226874	132092	160691	131672	93972.7	72372.5	184196	91338.7	161921	369729	335033	372239	292405	165914	167040	234081
M161T24	1.73182	2.73182	3.90064	0.000529854	0.000306529	UP	161	161	161	24.2512	Beta Damascenone	24.2434	24.2582	21	8	13	18664	13641.6	5071.35	23624.8	10575.5	12674.2	18184.8	11539.8	14288.1	18497.9	6236.13	13241.1	15332.5	13621	22412.5	23319.1	19155.8	17602.1	6886.74	11380.2	11542.2	8057.42	5299.57	15655.7	8184.11	13362.8	39075.5	33819.2	32253.8	28691.3	13265.5	15568.8	24868.6
M79T24	1.56994	2.56994	3.30009	0.00270291	0.00120029	UP	79	79	79	24.2512	Beta Damascenone	24.2431	24.6703	37	16	21	192064	168030	52715.3	263797	122089	174368	197802	133284	182513	214940	91091.4	161009	143458	188548	245873	243568	229218	248722	156806	137359	146358	94876	69233.1	179344	99338.3	190933	407820	375793	407376	319360	179583	174747	255172
M190T24	1.54231	2.54231	3.79599	0.000662874	0.000362606	UP	190	190	190	24.2512	Beta Damascenone	24.2434	24.2572	42	21	21	391808	367239	111281	566395	213121	370466	429063	308955	400977	468472	194615	339177	359498	447851	484424	555130	504475	512356	306844	367323	299187	210815	160596	407068	206537	378192	835646	763996	836769	655621	374488	382811	541881
M103T24	1.64914	2.64914	3.22125	0.00347604	0.00149162	UP	103	103	103	24.2512	Beta Damascenone	24.2395	24.6574	25	10	15	96456	76905.1	24811.8	126827	66544.1	76157.9	101294	60177.8	95731.1	90709.7	38482.9	77680.4	61704	78716.7	104591	113666	117380	112593	53067.2	70957.3	73151.1	48513.5	34259.7	71996.3	48485.3	85692.1	196918	171336	203342	154649	10037.5	88840.5	123113
M182T24	4.76935	5.76935	8.56068	2.50921e-09	9.62945e-09	UP	182	182	182	24.4416		24.4156	24.4509	18	4	14	25888	6573.7	5566.19	31352.3	12039.7	3981.07	6290.57	4243.63	4825.42	6142.29	5654.08	3278.4	3279.24	4211.39	4690.88	13576.3	19471.7	24023.2	2800.63	6489.88	4104.51	4655.66	5157.02	4221.78	2512.79	4437.29	37013.2	30744	29806.5	42357.8	27767.1	18313.7	19066.3
M143T25_2	3.32706	4.32706	2.86324	0.00789637	0.00296763	UP	143	143	143	24.6496	Ethyl dodecanoate	24.2473	24.6662	23	3	18	74128	13109.2	19980	43615.1	44548.9	10963.5	14578.8	24909.4	92505.8	18429	33721.4	9989.51	2907.35	8301.4	7440.94	5862.83	3865.61	2512.7	4906.46	2496.13	1427.85	729.191	4994.78	14323.8	4989.12	5437.51	26734.9	21998.4	19453.7	6839.63	180272	17970.3	52121.5
M89T25_2	4.05266	5.05266	2.95832	0.00627679	0.00244575	UP	89	88.9	89	24.6528	Ethyl dodecanoate	24.0207	24.6662	22	6	16	119832	17198.9	33054.2	69701.4	74308.6	18386.4	23792.8	19498.4	150610	26822.9	54522.2	3092.13	2828.15	3600.7	3376.2	7309.6	4691.91	1454.22	4608.05	2567.37	1455.05	1797.53	6911.85	5671.35	10795.4	7385.06	25905.7	37672.3	25601.6	9827.2	295185	30341.6	78321.9
M102T25	3.66892	4.66892	2.85637	0.00795433	0.00298573	UP	102	101.9	102	24.6574	Ethyl dodecanoate	23.7946	24.6694	18	4	13	45200	6906.34	12444.2	25338.8	26826.1	6975.17	7273.84	15788.2	55499.4	10671.1	21517.7	985.765	1318.44	1349.17	159.43	1889.49	1169.32	826.461	1718.93	1449.65	139.308	465.161	3838.77	6820.65	3224.28	1952.96	8018.37	14324.4	25107.3	2937.79	107611	11074.1	30193.8
M228T25	4.21105	5.21105	2.75535	0.0102672	0.00369263	UP	228.1	228.1	228.1	24.6593	Ethyl dodecanoate	24.6056	24.6684	14	3	11	55496	6878.7	14887.6	28966.5	33583.6	5731.95	6482.96	20424.6	66148.8	9939.66	20921.2	1114.42	298.911	750.481	385.596	1735.46	1011.61	246.66	1156.32	515.09	274.082	169.037	2859.99	1266.14	1665.98	1353.67	3728.06	13456	9464.39	2684.24	130669	10072.5	36248.3
M83T25_2	1.9107	2.9107	2.32952	0.026612	0.00844017	UP	83	83	83	24.6614	Ethyl dodecanoate	24.6056	24.9186	14	2	12	85616	32276.3	27290.2	61670.3	50977.9	24152.8	25140.8	77162.5	122693	46990.5	57173.6	13653.5	18644	14489.4	31375.1	14944.9	43563.9	10341.6	36314.3	12206.5	10535.7	8704.79	15950.7	39112.6	36901.8	17750	43059.9	35601.2	33019.5	19041.4	214846	38676.2	80847.4
M151T25	2.09138	3.09138	-4.59215	6.48934e-05	5.47491e-05	DOWN	151	151	151	24.9402	Hexanoic acid	24.8938	24.9659	34	19	15	50536	70063.3	31612.8	33500.9	18217.3	95848.9	141120	74689.7	69299.2	59106.9	58984.7	16726.4	108854	12248.2	32472.4	26074.8	79032.2	48337.6	97166.6	92476.7	77435.8	64205.9	63919.8	99026.6	69625.3	84678.8	52286.2	55241.5	56003.8	5795.49	12264.7	13498.1	14569
M136T25	1.82334	2.82334	-3.5654	0.00104197	0.000518494	DOWN	136	136	136	24.9403	Hexanoic acid	24.7832	25.0557	32	19	12	44000	62239.8	29365.3	34135.1	21036.5	83400.2	127395	58661.7	58918.2	46079.5	60452.8	13886.9	108637	12203	23118.2	21969	63775.7	53864.2	88041.4	89952.5	66628.8	58586.2	56340.4	81982.5	58901.9	74241.6	44476	36193.4	46882.6	5539.57	96222.7	12101.1	14462
M107T25	1.97717	2.97717	-4.26455	0.00015291	0.000111436	DOWN	107	107	107	24.9413	Hexanoic acid	24.8972	25.0479	17	13	4	44992	57336.6	25774.1	28999.3	16215.2	69847	111298	64512.4	62196.8	33522.2	65459.9	10032.4	87640.7	11388.5	22997.4	25831.2	64319.9	39821.5	78609.3	69221.7	66489	58040.7	53232.7	87152.1	54127.7	68326.2	44887.5	32933.6	36725.4	7315.31	77041	13561.4	15886.6
M125T25	2.58458	3.58458	-6.12142	1.29943e-06	1.89278e-06	DOWN	125	125	125	24.9427	Hexanoic acid	24.9199	24.9653	19	14	5	26496	38619.2	16101.2	14942.2	7411.15	43451.1	63236.7	45560.2	37280.1	29600.8	36359.4	10214.3	59029.9	10155.7	18413.6	11472.1	51923.5	25035.4	51474.1	49784.3	43402.2	37671.1	38390.5	56164.3	37748.7	54635.7	24473.2	19532.1	26058.8	2612.78	8819.12	7741.2	14041.4
M88T25	7.35183	8.35183	1.00795	0.325484	0.0822818	UP	88	87.9	88	24.943	Hexanoic acid	24.6535	25.5562	26	13	8	1104896	19313.6	21774.5	141990	557317	13035.7	10312.2	84905.8	72253.1	23739.8	13419.5	13832.3	7513.58	25984.5	11183.4	12366.1	36149.5	23897	1914.03	2324.67	24625.3	4472.01	4250.04	8563.18	4432.76	6409.98	12470.5	10174	5594.62	2281.21	2.5692e+06	9977.67	7720.93
M142T25	1.5683	2.5683	-6.90019	3.11835e-08	8.03826e-08	DOWN	142	142	142	25.341	2,2,4-Trimethyl-1,3-pentanediol diisobutyrate	24.9038	25.6883	32	17	13	14984	42308.7	7866.72	26977.5	6464.04	51887.4	44948.3	47668.9	52403.2	34511	35417.8	47032	49566.2	46594.9	46192.6	51424.8	43562.6	44328.1	44465.2	37569.2	38025.4	30407.8	27379.6	50200.6	28194.7	36703.2	30747.6	25588	30773.5	24583.9	9155.72	11412.9	28364.7
M84T25	1.59198	2.59198	-5.93928	1.09377e-06	1.63408e-06	DOWN	84	84	84	25.3481	2,2,4-Trimethyl-1,3-pentanediol diisobutyrate	24.3981	25.5855	64	17	17	21712	72583.2	17679.6	45593.1	11004.7	99061.9	55683.9	57384.8	95149	74020.3	69505	84461.4	91487.8	79240.1	71195.2	87403.3	40722.3	52187.6	98659.4	67339.7	63510.4	49931.1	56675.2	98567.7	65563.3	66499	60320	62880.1	41699.8	48533.4	58057.3	43726.6	60555.2
M44T25	1.58335	2.58335	-5.60324	3.94562e-06	4.99653e-06	DOWN	44	44	44	25.3485	2,2,4-Trimethyl-1,3-pentanediol diisobutyrate	24.6613	25.3604	45	20	15	68728	205124	54437.9	129550	29268.7	207543	262952	282942	284049	171913	240071	276513	288132	203776	204306	204849	180352	144158	203823	176268	133819	119721	109204	200443	242111	170652	138578	151082	133810	116362	135495	133761	128658
M128T25	1.53982	2.53982	-7.2694	1.63049e-08	4.86398e-08	DOWN	128	127.9	128	25.3486	2,2,4-Trimethyl-1,3-pentanediol diisobutyrate	25.1348	25.3642	44	21	20	30352	73198.8	13358.2	47537.3	9124.02	82679.8	77864.7	85074.5	94318.9	64715.4	71585.5	89158.4	72828.5	68158.6	92616.4	91632.6	68513	60954.6	77848.2	61207.8	70037.4	43839.7	54639.5	81632.8	62952.6	64915.4	54577.3	48144	46233.5	46737.2	54595.8	45262.3	54846.3
M96T25	1.53879	2.53879	-6.50272	2.09824e-07	3.79839e-07	DOWN	96	96	96	25.3521	2,2,4-Trimethyl-1,3-pentanediol diisobutyrate	24.6613	25.3604	37	18	16	16488	40602.5	8515.96	26386	5277.34	48083.2	38271.7	56719.5	44923.5	39944.8	37640.2	41893.7	47804.9	44712.6	50050.8	41983.3	45146.6	38488.3	50064.5	35999.2	30006.1	27018.3	23747.5	47603.7	31354.4	31195.1	30222.6	32213.1	30546.6	19923.2	28625.8	28175.3	29534.2
M160T25	1.50091	2.50091	-6.42956	3.589e-07	6.16164e-07	DOWN	160	160	160	25.3524	2,2,4-Trimethyl-1,3-pentanediol diisobutyrate	25.3401	25.3642	32	19	13	39888	73733.3	15367	49125.6	8453.63	97198.1	82520.3	86102.9	92672.5	55344.6	74569.7	85263.4	96511.5	80845.7	76839.6	89800.4	68116.7	68323.3	69524.4	56942.6	57494	49499.5	42972.3	80909.7	70695.8	66253.2	51237.3	56749.1	43359.7	38496.7	53913.1	59121.2	57962
M156T25	1.58107	2.58107	-6.44951	1.23875e-07	2.40317e-07	DOWN	156	156	156	25.3524	2,2,4-Trimethyl-1,3-pentanediol diisobutyrate	25.3401	25.7742	28	13	15	27032	48074.8	9578.82	30406.6	8114.51	59264.9	48654.5	59939.3	60678.8	45495.1	51760.7	59496.8	48439	56083.7	45657.4	58084.2	47414.3	42915.8	55910.3	47327.6	33104.2	30532.1	29252.6	47304.7	44010.2	38245.1	37854	37138.4	35701.5	26713.3	38253.1	3133.61	30854.8
M95T25	1.58772	2.58772	-6.9704	2.15698e-07	3.88701e-07	DOWN	95	95	95	25.3527	2,2,4-Trimethyl-1,3-pentanediol diisobutyrate	25.0557	25.5757	46	21	20	51000	141417	32076.9	89069.2	12469.4	154115	120413	214651	154078	164726	112862	128850	166564	126951	195923	160056	184195	127723	139390	112905	121462	78209.8	110035	145213	120427	131012	82325.9	106853	100400	102427	88532	80744.8	92918.4
M42T25	1.51853	2.51853	-5.05837	1.46664e-05	1.57725e-05	DOWN	42	42	42	25.3529	2,2,4-Trimethyl-1,3-pentanediol diisobutyrate	24.9427	25.5826	63	21	21	71464	198639	51946.5	130810	32826	300043	267968	201275	200349	244385	242326	188058	236834	268532	195877	215821	176546	151579	183252	162001	133445	115338	99817.7	189826	161695	236457	133153	219716	192578	126158	181661	131988	122319
M50T26_1	3.52427	4.52427	-6.33095	2.83379e-06	3.72458e-06	DOWN	49.9	49.9	49.9	25.5388		25.5074	25.7962	20	14	5	23192	28608.7	14656.4	8117.63	2277.14	35089.7	35412.8	46908.2	39475.3	34560.1	41163.4	36918.6	6594.75	23253.9	30006.6	26187.5	64155.4	49010.6	15976	11360.4	19932.8	16975.4	19192.5	20474.2	9245.23	18890.2	5794.9	6691.17	5085.77	4878.72	7791.06	9384.1	7477.19
M80T26	1.77305	2.77305	-1.51754	0.140941	0.038076	DOWN	80	80	80	25.5395		24.9427	25.8115	24	15	5	60664	29338.6	14682.6	16547	35728.3	34742.7	37451.1	48369.6	37500.4	43181.1	32151.3	38411.4	10585	28447.5	30402.7	27835.4	63188.5	52129.9	19357.2	8383.21	18099.2	13081.5	19630.1	21825.3	11731.6	19606.7	5990.81	9801.94	4906.26	4357.41	172005	8405.05	7306.67
M79T26	3.33394	4.33394	-5.17726	2.09286e-05	2.11684e-05	DOWN	79	79	79	25.5405		24.9227	25.7979	24	15	7	213248	264552	152526	79351.2	60066.6	302809	346112	481341	402256	392332	317828	347570	76566.3	294969	280145	264202	593779	482781	144078	78049.7	142592	147403	171179	86672.5	77212.9	125706	36703.7	63242.1	71690.4	40174	325650	64501.2	63903.4
M66T26	2.76767	3.76767	6.53625	2.19555e-07	3.94477e-07	UP	66	65.9	66	26.2233	phenylethyl alcohol	25.79	26.242	26	6	20	16093	8389.46	5274.86	23219.3	8959.78	9740.32	8251.55	19664.7	20624.6	10557	6181.04	7554.29	1841.03	9159.61	10076.6	9887.01	16329.2	11668.2	4749.03	3040.95	5870.78	3138.39	5399.21	5331.33	2073.03	5040.86	14131.5	10924.4	12190.6	10498	43808.5	15691.8	27569
M90T26	3.04353	4.04353	5.76285	1.7935e-06	2.52049e-06	UP	90	90	90	26.2233	phenylethyl alcohol	26.2193	26.2426	13	2	11	20480	8782.78	7619.92	26730.7	12067.6	8693.59	7302.64	20446.2	32172.2	13860.3	7240.24	10650.7	1873.97	6171.01	8452.02	11265.8	19468.8	11324.1	4253.78	859.841	4742.1	3731.44	4042.62	3124.8	1586.95	3175.16	11583	17407.8	10814.4	12049.3	55073.4	14429	36346.2
M50T26_2	2.6408	3.6408	6.36387	1.85258e-07	3.4188e-07	UP	49.9	49.9	49.9	26.2233	phenylethyl alcohol	26.2193	26.242	17	4	13	36808	18591.8	13515.9	49097.4	17316.5	20075.4	17021	48234.4	53155	26401.8	12461	22591	5614.89	16914.7	21403.4	20346.2	37732.1	21882.9	9831.59	4765.61	12425	9721.07	8593.95	8366.67	3491.02	9400.2	33520.3	30124.6	28842	21836.3	85144	22259.2	62301.5
M51T26	2.46381	3.46381	5.57547	2.9436e-06	3.84264e-06	UP	50.9	50.9	50.9	26.2272	phenylethyl alcohol	26.2193	26.711	21	6	14	74032	38915.6	25618.3	95880.6	39190.1	42694.6	46727.5	83854.4	114751	47954.9	33907.5	44803.6	10896.8	40250.9	51749.4	44772.1	56807.4	52521.9	22377.7	15461.5	27309.2	17169.6	19425.6	18367.5	8181.72	17242.8	75583.2	61074.8	61242.2	55468.1	186324	64313.8	117676
M123T26	2.12301	3.12301	5.32386	4.64845e-06	5.80042e-06	UP	123	122.9	123	26.2273	phenylethyl alcohol	25.8066	26.6979	48	15	21	37704	27615.9	16900.2	58628.9	20663.9	24909.3	27786	71943.2	62212.1	37822.5	21660.4	27936.1	25174.3	19764.4	34510	25351.6	52175.1	32011.2	24869	7734.68	16677.6	9607.49	16051	22335.7	7422.24	11979.6	38722.7	40975.6	35020.2	25186.5	107643	38992.2	74715.6
M141T26	5.55077	6.55077	-5.05135	5.88627e-05	5.04931e-05	DOWN	141	141	141	26.2273	phenylethyl alcohol	25.6952	26.2428	13	11	2	79912	73327	54362.3	13210.2	4371.93	147841	143635	101924	125297	101582	97195	211785	30990.8	110372	80674	90914.3	61448.9	48117.6	36555.7	22061.6	16717.2	16201.4	16982.7	21302.5	31616	26653	13182	10345	18243.4	16996.1	24907.7	9807.99	14034.2
M156T26	6.2611	7.2611	-4.89019	8.49171e-05	6.80392e-05	DOWN	156	156	156	26.2286	phenylethyl alcohol	26.2024	26.2429	16	14	2	55488	48406	37968.5	7731.22	3351.36	108580	88849.9	66121.6	89095.3	73269.1	63880.7	140584	19925.7	71659	50328.6	66465.8	40976.2	34427.4	19180.4	14451.4	12592.6	6448.54	6142.26	12711.5	19443.6	11391.1	9505.72	9146.82	10701.1	13104.7	11043.2	3956.5	7856.08
M91T26	3.17384	4.17384	6.96974	3.32228e-08	8.42187e-08	UP	91	91	91	26.2292	phenylethyl alcohol	25.7866	26.7002	40	14	21	1469440	696269	585557	2.20984e+06	804666	698752	766554	2.01176e+06	2.26362e+06	1.01638e+06	662721	742265	47259.9	707024	753785	661601	1.35173e+06	842067	116896	174479	491319	358724	411168	51076	155335	337134	1.4699e+06	1.48309e+06	1.20226e+06	1.05185e+06	4.0989e+06	1.39378e+06	2.64997e+06
M142T26	5.8505	6.8505	-4.95547	7.40894e-05	6.10212e-05	DOWN	142	142	142	26.2308	phenylethyl alcohol	26.1907	26.2546	17	14	3	142144	129225	98829.7	22087.9	6973.44	264071	230978	184530	244980	188118	169462	377475	46005.7	194756	161424	156870	105320	87913.9	64876.2	33137	31505.6	28658.8	27338.6	23858.3	50673.8	41777	23798	29434.3	25840.8	31909	36778	20874.7	18786.3
M92T26	2.85982	3.85982	6.85161	5.50987e-08	1.23099e-07	UP	92	92	92	26.2312	phenylethyl alcohol	25.7812	26.7	51	20	21	813056	435659	307711	1.24591e+06	446085	457497	473729	1.12321e+06	1.25118e+06	569290	375488	476021	91695	387999	461307	475810	768724	604996	181874	118202	284109	239504	271751	267935	83662	184863	800339	923743	652487	598550	2.27483e+06	793978	1.47556e+06
M158T26	5.14158	6.14158	-4.84769	9.33484e-05	7.32455e-05	DOWN	158	158	158	26.2325	phenylethyl alcohol	26.1991	26.2467	18	12	6	39480	35986.9	27285	6999.18	2533.5	76373.2	65937.6	46286	66102.3	47355.2	50490.7	103447	13872.1	54197.6	41103	49739.5	28310	28403.5	18648.6	10480.1	8280.8	6147.32	6328.42	11891.3	12517.8	9812.04	7410.32	7279.41	8623.3	10739.1	13988.3	6212.39	7788.37
M93T26	2.29945	3.29945	5.98457	5.96627e-07	9.66923e-07	UP	93	93	93	26.2334	phenylethyl alcohol	25.7859	26.7036	56	18	20	63056	43571.2	26931.3	100190	33975.6	45480.7	48234.3	104529	106989	50505.8	35782.1	51821.2	16561.5	42132.4	55851.6	45385.5	80498.8	56610.6	20749.4	13020.8	26999.4	21292	30234.3	30056.8	10887.6	21372.1	66036.4	75995.7	59573	55933.6	187244	65899.1	120870
M157T26	4.70065	5.70065	-5.02659	6.25373e-05	5.31032e-05	DOWN	157	157	157	26.2348	phenylethyl alcohol	26.1988	26.7817	46	21	21	308352	297544	212929	63298.5	16327.5	618444	525792	402628	529688	426405	382845	821535	136578	429936	339797	390521	234033	228677	152090	93565.3	76067.2	62298.4	73650.2	92991.6	126021	104859	71202.8	66988.6	80088.7	80837.5	99403.7	54618.2	54633.8
M135T27	2.00053	3.00053	-4.88989	4.41301e-05	3.98506e-05	DOWN	134.9	134.9	135	27.1078		26.6838	27.2798	62	21	19	65176	92861.3	40434.4	46418.2	16106.3	68155.3	86194.3	61356.2	95844.9	78508	62143.6	72632.5	79223.5	110353	158888	120264	200975	177065	97425.4	73632	76125.1	46473.4	61289.7	84831.3	61811.2	76896.7	59717	50802.8	54024	23928.5	27135.5	24690.7	27594.9
M108T27	1.98772	2.98772	-4.13778	0.000374444	0.000232853	DOWN	107.9	107.9	108	27.1089		26.6862	27.1239	26	15	9	20184	26703.7	14022.2	13434.4	4398.14	20133	25253.6	22978.2	29366.8	17569.3	13797.9	23144.1	22665.7	34342.4	46046.7	37222	66161.1	52958.2	28563.8	9889.09	22018.5	11461.8	16160.8	22603.2	16264.1	22177.9	16128.9	14966	13754	8123.85	16628.6	6631.65	6586.49
M71T27	1.69022	2.69022	-3.58659	0.00126399	0.000610096	DOWN	71	71	71	27.2192		27.2112	27.2349	37	20	17	54008	122271	58119.5	72340.6	26307.4	225151	169083	245349	186833	107057	105524	150650	151166	83159.5	161870	101222	187480	56857.7	103554	61283	75185.5	39398.8	47168.5	128493	104781	76427.2	104694	89615.3	53889.4	65390.3	118255	87650.1	81382
M70T27	1.67603	2.67603	-3.73895	0.000828337	0.000425797	DOWN	70	70	70	27.223		27.2151	27.2412	42	21	21	168576	255139	114179	152228	53592.7	471371	370360	459665	473508	295082	275202	308471	297685	195564	224592	245587	232044	123412	212586	138558	194237	84413.6	99745.5	276221	208358	171245	131241	129042	123952	170867	313192	207085	189454
M85T27	1.67584	2.67584	-4.19407	0.000215091	0.000148073	DOWN	85	85	85	27.223		27.2112	27.2373	36	19	17	30608	53957	20921	32197	11295.8	87631.9	76323.2	85246.7	87414.6	54766.5	57840.7	63364.3	66313	44578.8	58756.8	55017.6	57501	19221.1	53484.6	32215.2	39971.4	19814.6	22083.5	68530.5	47012.3	36009.1	30682.5	28446.8	27484.1	33360.6	64721.1	40431	44478.6
M57T27	1.61524	2.61524	-3.97102	0.000398087	0.000244765	DOWN	57	57	57	27.223		27.0083	27.2386	44	21	19	141760	229609	88671.3	142152	48203.1	371226	334199	381115	390829	233027	258936	280341	283845	168356	212081	220469	225914	117473	215144	134439	180849	89216.9	101083	262617	193959	166677	130989	124953	110271	156700	281169	192969	178899
M82T27	1.66514	2.66514	-3.6524	0.000960348	0.000483375	DOWN	82	82	82	27.223		26.695	27.7299	42	20	16	79616	114049	50342.6	68492.2	27070.1	199318	177337	200607	210582	107851	130882	142909	143543	73419.1	103776	105285	101451	49648.3	101994	67383.3	92319	38359.8	48406.2	124814	94125	81021.6	59551.3	54413.3	49195.5	78907.5	151081	89614	87042.2
M56T27	1.64258	2.64258	-3.72825	0.000788291	0.000410827	DOWN	56	56	56	27.223		27.2151	27.2412	42	21	21	152320	218143	92651.5	132805	49174.6	374722	328247	364355	393917	210378	243335	276945	279852	158966	198089	220964	202445	105834	183721	119094	175008	75084.4	80964.1	247837	186436	154801	115387	117530	93702.9	151987	284093	185981	160217
M112T27	1.71024	2.71024	-3.73757	0.000767307	0.000402815	DOWN	112	112	112	27.223		27.2151	27.2425	33	19	14	32952	45843.6	20607	26805.3	10964.8	84235.8	68746	81203	83763	46437.7	53391.3	59157.1	47734.4	32223.6	40345.8	45423.9	46495	19637.4	37858	24898.8	35988.2	13732.7	18506.4	51943.9	39724	31270.3	22095.5	21379.6	20768.1	27631.8	59315.6	38885.5	36619.4
M98T27	1.66692	2.66692	-3.74436	0.000757229	0.000398952	DOWN	98	98	98	27.223		27.2151	27.2387	37	19	18	58400	82987.2	35936.1	49784.7	18968.7	146355	126357	141689	147966	84325.7	94528.4	104100	102141	58887.5	72292.9	82720.4	79674.9	37725.9	73059.7	46501.9	64573	25295.3	34074.7	94754.8	70674.9	55032.8	45423.8	37899.4	40525.5	55537.4	108275	70401.3	64796.4
M97T27	1.65412	2.65412	-3.82602	0.00061069	0.000341284	DOWN	97	97	97	27.223		27.2151	27.4683	43	21	21	132480	200291	84087.3	121087	43921.2	345962	298994	344635	351506	198400	225330	243631	241921	137201	191990	192000	204526	100172	182650	110414	157844	67906.9	80424	229693	165184	135739	105153	101421	103612	134185	254767	168860	158585
M111T27	1.64866	2.64866	-3.65745	0.000967187	0.000486348	DOWN	111	111	111	27.223		27.2151	27.7737	43	20	20	69784	102846	44986.2	62381.5	23381.4	178030	154158	180714	182741	103428	117415	121585	124981	64466	98294.2	100348	104858	42193.4	93374.4	54772.5	81349	34656.1	39769	127524	85501.2	69604.6	56882.6	53787.4	44057.8	66720.2	131172	89318.9	85057.6
M84T27	1.63602	2.63602	-3.75761	0.000738853	0.000392085	DOWN	84	84	84	27.223		27.2151	27.2387	42	21	21	106128	147091	61903.3	89907.7	32113.4	253433	219578	245175	267954	143510	164444	187631	179266	105846	130964	150142	140367	70982.6	129831	85293.9	116895	50125	58425.8	162968	122641	103435	79581.2	77241	73052.4	99727	191151	124275	114414
M96T27	1.70849	2.70849	-3.85053	0.000540936	0.000311392	DOWN	96	96	96	27.2268		27.2191	27.2347	20	11	9	28160	42126.6	18109.6	24657.2	10212.4	73258.6	55260.5	76070.9	65714.1	50566.6	44239.7	51163.9	50573.1	29189.2	42750.6	44351.4	50708.6	16616.8	43562.6	21429.1	32937.4	12257.1	18531.1	52780	24368.3	28329.2	22067.7	17193.6	14761.9	31076.5	53512	32531.2	40452.8
M55T27	1.61092	2.61092	-3.7047	0.000823242	0.000423915	DOWN	55	54.9	55	27.2306		26.7036	27.9449	52	21	18	216576	329445	135519	204507	74285.2	553913	487451	586532	558780	354910	346929	393382	400008	219169	316532	299395	306283	170775	349448	190093	264775	116557	133799	378042	258965	232609	204199	156428	164962	194376	414342	288969	261318
M125T27	1.64237	2.64237	-3.61146	0.00109086	0.000539149	DOWN	125	125	125	27.2306		26.7075	27.7542	23	10	11	20256	27764.9	12212.5	16905.4	6382.16	44717.7	38273.2	55842	46181.4	31257.5	28597.1	28985.4	30141.7	19301.4	28458.4	28919.9	32419	12099.4	28018.5	13999	22349.2	6703.74	9772.48	33452	23663.2	19910.3	14740.4	14858.1	13284.1	19364.8	32664.6	25243.4	26936.4
M83T27	1.63921	2.63921	-3.7936	0.000666203	0.000363936	DOWN	83	83	83	27.2306		26.7075	27.7774	54	21	21	187712	270682	112972	165130	59116.6	463545	402016	457400	484207	265893	302096	340679	321795	190009	251945	274431	260150	135077	244242	154140	215512	90804.1	112269	311713	224300	182104	148031	140113	140586	184769	341791	230838	213181
M69T27	1.64985	2.64985	-3.65104	0.00106882	0.000529871	DOWN	69	69	69	27.2308		27.2151	27.7815	60	21	21	205632	323076	145559	195822	65757.4	537262	465397	666106	590059	316482	346204	377518	379780	238997	293132	310372	316709	159464	287147	177465	244678	115404	130828	362413	257394	211795	180738	168359	159143	212984	388811	260787	255269
M70T28	2.18734	3.18734	-3.9853	0.000371826	0.000231517	DOWN	70	69.9	70	27.7282		27.7179	27.7698	22	14	8	29936	37899.8	20606.3	17326.9	11618.8	41205.6	32027.8	68986.5	43863.7	40743.8	41997.7	24431.4	78993.7	20810.9	51813.8	16027.5	65882.1	13838	47245	29453.6	21697.6	7778.59	24690	74963.3	24958.6	24486.9	17247.9	22164.6	9888.44	2718.28	13137.7	43689	32418.7
M99T28	2.04335	3.04335	-2.78917	0.0106251	0.00380487	DOWN	99	98.9	99	27.7421		27.2308	27.7786	45	19	15	111032	78311	63917.3	38324.9	15186.8	81375.9	67442	119369	325392	57143.9	63589.1	39384.7	118302	51478.3	93797.9	32231.6	104923	39908.5	74338.7	57066.5	26558	34672.9	62451.7	116417	37071.9	41615.2	42344.2	34377.5	23431.1	20733.2	43427.1	64953.1	66950.7
M58T28	1.8669	2.8669	-4.33567	0.000160982	0.000116433	DOWN	58	57.9	58	27.7422	biphenyl	27.726	28.5596	21	15	5	11600	16345.6	7222.01	8755.5	3493.05	22459.6	15612.5	26770.6	16633.8	14905.8	17981.9	10977.3	28111.7	9749.66	21530.1	9900.31	19995.5	18553.6	29243	13366.1	6337.88	6339.6	11183.6	25555.6	9334.98	8715.38	9342.51	7029.71	6034.31	3753.06	10529.8	12451	13074.2
M84T28	1.73223	2.73223	-3.17205	0.0030979	0.00135138	DOWN	84	83.9	84	27.7423	biphenyl	27.726	27.9449	23	12	11	20024	31235.8	15610	18032.1	10962.9	43255.7	31409	54597.4	37001.3	26366	36430.8	22761.7	54274.6	16158.3	42940.6	18243.5	57425.9	12558.4	36670.2	30061.9	11224.8	10961.8	22928.7	56228.1	16895.6	17558	16568	18605.5	14601.9	6572.9	18148.4	25377	26401.4
M56T28	1.8616	2.8616	-3.91362	0.000517815	0.000301191	DOWN	56	56	56	27.7423	biphenyl	27.726	27.7736	24	14	10	32376	47935.9	23497	25749.9	11079.8	64611.8	46354.6	97544.1	49141.9	38383.8	49194.7	31326.8	84728.7	35640.8	59699	26729	79742.2	21014	60905.1	48634.1	18372	18167.5	39405.5	82913.8	25439.3	28704.7	24079	32017.4	22159.5	10929.5	27619.7	41128.2	42385.7
M57T28	1.83182	2.83182	-3.93246	0.000457221	0.000273417	DOWN	57	57	57	27.746	biphenyl	27.726	27.7737	41	21	20	212480	295182	138516	161141	72194.3	389380	263074	508357	286671	258929	302703	187944	563696	215693	407841	187812	466924	136737	365733	278956	106426	113802	248505	537027	180919	191688	175214	185292	120203	60847.5	166807	278358	282642
M71T28	1.81115	2.81115	-3.8844	0.00053658	0.000309486	DOWN	71	71	71	27.7462	biphenyl	27.726	27.7737	42	21	21	166784	227327	107387	125515	53803.1	298983	200625	390595	218548	200493	239226	144177	429791	163694	319325	110664	363785	114183	280235	214242	88709.1	96611.5	196274	419537	138080	146088	133615	138433	87533.4	50698	128701	216389	222405
M85T28	1.82674	2.82674	-3.98464	0.000415452	0.000253345	DOWN	85	84.9	85	27.7504	biphenyl	27.7301	28.1441	45	21	21	130912	181441	84801.1	99324.9	41561.2	238740	168767	316278	171501	160501	192845	110410	337795	130227	246184	79304.4	287291	91599.6	225622	170447	70713.4	81555.9	161722	332459	117721	118573	103440	110347	70745.9	30473.2	103265	170378	174803
M86T28	1.55124	2.55124	-4.09531	0.000254313	0.000169167	DOWN	86	85.9	86	27.752	biphenyl	27.2075	27.77	14	11	2	15253	26593.3	9011.16	17143.2	5533.3	42800.8	26514.2	40315.7	28910.3	19081.5	25341.1	21766.9	35611	26727.2	37118.8	16909.2	41771.7	15243.1	28534.7	21673.6	13306.4	15122.3	23117.7	33634.4	24675.1	20282.8	15041.8	17968.3	18094.7	10448.7	4125.69	21541.4	31213.5
M113T28	3.0729	4.0729	-7.12718	6.82991e-08	1.44058e-07	DOWN	112.95	112.9	113	27.7779	biphenyl	27.7303	27.7983	40	20	8	42208	71632.3	27734.8	23310.9	14002.8	58468.9	39626.9	73284	42244.5	38805.3	53900.8	46720.4	83493.2	33197.9	50168.7	122382	60426.3	92480.1	109911	115008	49209.3	73573.2	84584.6	90112.5	73484.2	113197	22390.6	40725.7	13259.1	18627.5	28295.5	47781.2	49308.1
M156T28	4.11879	5.11879	7.68175	1.07318e-07	2.11714e-07	UP	156	156	156	27.9416		27.7581	27.9496	39	13	21	99480	34667.2	14843.4	142787	62767.8	40021.2	39600.3	38790.4	46400.3	33330.6	42942.8	48561.5	20413.1	36669.3	67762.1	64880	41194.4	40507.9	24600	19360.5	22117.8	12301.7	23233.4	18073	23962.5	23287.4	92600	112129	110696	240540	231435	156329	282175
M157T28	3.55725	4.55725	10.8959	5.10163e-11	2.69091e-10	UP	157	157	157	27.9481		27.9447	28.0943	16	1	14	13960	6770	2481.27	24082.6	6845.5	11401.2	7352.44	8335.58	10181.8	6586.57	4429.66	6458.37	6779.73	5380.36	12611.3	7426.02	8923.32	8113.35	5535.93	6481.69	4813.08	3823.85	4632.87	5366.38	3925.68	3610.85	25977.2	23150	23051.9	34996.5	32898.4	20684.9	36437.9
M83T29_2	1.86707	2.86707	-5.23674	9.86553e-06	1.11916e-05	DOWN	83	83	83	28.5513		28.5385	28.8164	20	16	4	23592	61638.5	21655.3	33013.4	12590.2	78106.3	73720.6	96783.3	95546.2	64271.2	65747.1	70180.5	66575.9	48179.7	61317.2	59764.8	94726.7	33171	66835.8	46173.1	36069.3	23014.8	34294.2	88210.7	46958.9	44761.5	35230.8	26866.1	33618	22105.1	64753.3	46970.8	45047.7
M71T29	1.6846	2.6846	-5.17672	1.06302e-05	1.19177e-05	DOWN	71	71	71	28.5534		28.5385	29.2069	36	17	11	29528	76411.9	23368.3	45359	14476.3	103958	95358.2	114644	111366	69422.6	85177.1	85761	89027.2	64759.5	82213.2	79126.9	95887.3	54638.9	85369.8	67964.5	49682.6	29576.1	38840.3	92951.3	52268.5	56657.5	47585.2	49258.8	33295.4	31917.4	59750.3	65427.9	65456
M57T29_2	1.75444	2.75444	-5.45574	5.0335e-06	6.23093e-06	DOWN	57	57	57	28.5534		28.5391	28.8164	30	16	12	44064	116878	36322	66618.5	21514.7	163870	145425	184455	157308	106280	125818	124688	126214	98576	118295	140044	152302	76024.3	124026	108228	77931.2	44084.3	55173.8	145603	92207.1	87886.2	80974.2	67562.4	58819	50650.3	103608	100195	78038.4
M84T29_2	1.847	2.847	-5.05086	1.34242e-05	1.462e-05	DOWN	84	84	84	28.5542		28.5431	28.8202	16	13	3	11093	22759.6	7815.34	12322.4	5347.09	32844.2	26279.8	38407.7	32194.9	20646.4	22928.1	26815.7	25083.3	16199	24414.6	22412.3	31717.9	14246.5	27292.8	20636.5	16000.8	8697.68	9435.4	27791	14729.6	19177	15590.3	11002.9	9303.41	7499.03	28222.1	18562.4	15539
M85T29_2	1.63926	2.63926	-5.16313	8.55473e-06	9.906e-06	DOWN	85	85	85	28.5549		28.5352	28.8163	20	14	6	41840	88769.2	24661.3	54151.9	18325.8	122083	103080	121646	114959	95961.6	85569.3	100639	95429.3	88294.5	71395.4	108878	103658	51502.1	82324	74374.5	92164.9	42073.2	37844.2	121226	81839.7	69212.4	58968.2	54520.6	41040.2	43741.9	31856.9	100440	84779.2
M211T29	1.83323	2.83323	-5.17941	8.88125e-06	1.02312e-05	DOWN	211.1	211.1	211.1	28.5627		28.5512	28.8241	37	19	16	28808	43170.1	14254.9	23548.7	9908.58	58223.7	43923.3	66391.2	57140.1	50306	56051.6	53537.1	47304.2	36817.5	37642.5	39248.9	60541.7	21514.4	51304.1	44048.2	25641.8	12773.7	21694.2	49997.7	37210.4	35259.4	26945	26927.6	20130.8	11618.8	30225.6	31886.4	34589.5
M228T29	1.91792	2.91792	-5.76363	1.79365e-06	2.52067e-06	DOWN	228.1	228.1	228.1	28.5631		28.5513	28.5785	38	20	18	45072	71435.1	22992.3	37246	14500.9	101776	73963.1	107991	98067.8	85041.3	94834.4	80210.4	75805.6	56289.5	56505.9	65760.7	101513	40968.1	80266.5	70556.9	46469.6	23259.9	39993.7	82876.2	60051.4	57935.2	45271.1	41883.1	31208.8	22182.9	57601.2	55065.3	59248.8
M229T29	1.94348	2.94348	-5.77061	1.6992e-06	2.40412e-06	DOWN	229.1	229.1	229.1	28.5635		28.5549	28.5788	34	20	14	30976	46358.9	15045.4	23853.5	9646	61533.8	48370	73974.2	58753	55902.3	61056	51417.2	47782.9	39615.3	36580.1	43063.2	67089.2	26606.7	55309.5	46997.5	30800.8	16457	22329.9	56156.4	37075.2	36666.5	29978.7	27064.9	19486.5	14438.3	36209	35177.4	39310.2
M60T29_2	1.85285	2.85285	-5.78442	2.57685e-06	3.44192e-06	DOWN	59.9	59.9	59.9	28.5649		28.5509	28.8194	36	16	16	41728	67894.7	22009.9	36643.4	11337	92715.1	69636.5	111816	95581.2	76744.2	83458.1	87329	64287.1	58298	55455.8	68841	87377.5	47968.7	75310	59705.6	46082	17567.3	34223.3	79438.8	55918.5	58034	44986.1	43843.6	32918.7	26239.3	55365.9	46750.3	56848.7
M157T29	4.01648	5.01648	3.31451	0.00268503	0.00119332	UP	157	157	157	28.8123		28.5617	28.8203	17	4	13	43136	6938.64	10765.5	27868.9	26860.7	7433.01	12000	16628.2	46445.1	7708.14	23337.3	2467.3	1519.01	1557.99	5793.47	2225.4	1604.99	1523.06	2213.75	1973.34	740.92	754.906	1046.61	3393.31	1967.75	3378.07	11541.7	16712.8	13355.7	1115.6	103821	13915.1	43189.2
M83T29_1	1.61855	2.61855	-5.11197	1.85035e-05	1.91567e-05	DOWN	83	83	83	29.2111		29.1872	29.2233	19	14	5	42800	90402.2	27822.8	55854	13603.7	144408	130760	132473	127300	84566.8	91639.7	108770	96952	64270.5	86207.7	90297.3	110303	85488.9	74034.8	68825.3	68690.1	54205.4	39877.5	103638	70141	65597.4	67286.5	52295.9	50912.5	46180.8	79522.5	62641.2	79830.9
M70T29	1.58738	2.58738	-4.46686	0.000127846	9.5656e-05	DOWN	70	70	70	29.2146		29.195	29.238	23	17	6	21984	46242.1	16161.6	29131	6852.37	77247.7	67365.4	71432.8	76414.2	43980.7	40834.6	55432.7	46186.8	33773.7	41189	50005.4	53820.5	38531.9	39377.9	28798	33091	22622.7	21973.5	52541.3	39074.3	37389.6	31700.1	27351.6	27109.3	29888.1	48414.8	33822.3	38019.3
M185T30	2.94869	3.94869	-3.04758	0.00538696	0.002149	DOWN	185	185	185	29.5133		29.1183	29.5309	17	11	4	37952	24877.9	23291.9	8436.93	8286.21	36223	15956.1	96204.7	22968.2	45409.6	21541.6	13348.4	12408.8	9632.78	36389.4	10769.9	68310.1	7570.18	25904.2	10229.7	7581.82	3332.73	8631.48	46821.6	10415.9	12785.7	3724.75	3770.58	17011.5	2304.78	32888	14510.3	23446.6
M157T30	1.51048	2.51048	-1.59011	0.122628	0.0336392	DOWN	157	157	157	29.5361		29.4966	29.7958	24	12	6	35064	24102.5	21082.9	15956.9	10324.1	34207.3	15378.4	85793.1	36250.2	44636.1	24737.5	12357.4	11021.3	9029.67	33589	8323.46	61812.1	6286.24	23141.1	19031.8	5968.51	3489.71	4972.16	41296.7	10628.1	14201.8	14942.6	22526.1	24373.5	9411	35709.2	15504.9	26510.8
M159T30	15.206	16.206	7.12503	6.45581e-07	1.03575e-06	UP	159	159	159	29.6484		29.64	29.8941	15	1	14	26872	2020.92	927.615	30730.1	18441.4	1992.06	1829.39	3139.32	1567.74	2863.36	1539.99	1890.14	1725.79	1458.23	4240.49	2726.81	3007.71	1632.25	2492.93	1151.86	3585.34	696.445	1036.12	1254.78	1161.93	1446.56	72200.7	59197.3	54053.2	41569	12473.1	12013.7	35778.3
M177T30	3.00811	4.00811	4.49498	9.52219e-05	7.43731e-05	UP	177	177	177	29.6742		29.6403	29.9211	21	7	14	30776	11242.8	10686.8	33819.7	20385.6	4570.46	23326.6	6977.39	2624.65	28531.3	4002.62	4735.23	3946.67	23391.8	29968.3	23497.3	28117.1	3327.41	7461.72	3545.83	22708.2	1063.34	1892.28	6817.57	2541.32	3052.58	74104.4	70176.5	62860	44731.7	15854.1	15606.8	38617.3
M97T30	1.61945	2.61945	-3.76848	0.000718919	0.000384523	DOWN	97	97	97	29.6987		29.2106	29.7149	50	21	18	66152	86315.4	35662.6	53299	18441.9	107830	65065.8	116444	82929.2	60861.2	72352	80616.3	188163	78626.5	103037	68930.1	165431	60730.9	74974.9	96088.3	50843.1	56276.3	52354.1	99592.3	76656.6	54820.4	75383.8	71418.3	28911.6	29866.6	49847.2	50337.7	70245.2
M83T30	1.52085	2.52085	-3.78023	0.000626579	0.000347874	DOWN	83	83	83	29.6988		29.6908	29.7182	35	19	16	76568	103025	36589.6	67741.6	22150.2	121788	84024.5	128600	124512	64459.5	82757	96108	210658	97848.8	123436	89981.8	153288	63462.7	86729.5	122110	66579.2	74710.5	67745.6	140802	95961.7	67956.3	94424.8	102730	33330.8	45060.2	64929.4	64128.3	93547
M126T30	1.56181	2.56181	-2.94283	0.00572573	0.00226301	DOWN	126	126	126	29.699		29.363	29.7144	25	14	11	28424	26123.2	12114.3	16726.2	8207.68	33581.1	22475.5	25801.6	26872	11173.5	24319.8	26430.5	65694.7	24615.5	30859.9	19831.2	38291.9	13484.4	20001.8	40261.1	15131.9	17666.1	14122.9	32702.3	28083	17186.5	26954.5	26464	5419.75	9254.85	12162.1	11430.2	22254.6
M69T30	1.53967	2.53967	-3.73807	0.000698589	0.000376686	DOWN	69	69	69	29.7003		29.6899	29.9469	36	19	17	104048	145585	53315	94556.4	32724.9	182829	94389.9	195236	149218	89401.7	135973	126332	297634	131723	181893	110261	227390	112534	122188	198409	101812	93486.2	94496.9	168704	142033	101347	141569	131821	51638.7	53369.7	98200.3	90261.8	124425
M113T30	1.55148	2.55148	-2.84794	0.00752857	0.00285173	DOWN	113	113	113	29.7025		29.6899	29.7144	39	21	18	82048	74543.3	36489.3	48046.7	22052.1	98520.1	52624.9	79038.1	68552.9	26567.4	62586.2	71243.9	201503	73861.5	87773.5	51449	109385	51638.1	56333.3	108705	46089.9	58179.7	47403.8	92158.5	76724.3	45069.9	77230.9	75602.3	17821.9	21448.4	37035.8	36564.9	60480.4
M43T30	1.56835	2.56835	-3.31513	0.00227336	0.00102968	DOWN	43	42.9	43	29.7027		29.1875	30.2986	54	21	18	376512	384560	166329	245200	97186.1	487264	259691	376064	361578	165605	233012	348594	941647	382609	465176	293479	543011	430291	294192	540714	204268	294639	237692	460189	405427	350619	393670	275574	132520	117891	214505	173453	283184
M99T30_1	1.51403	2.51403	-2.88862	0.00676235	0.00260431	DOWN	99	98.9	99	29.7027		29.6872	29.8355	45	21	19	129416	124496	57129.1	82228.3	35107.2	158493	88027.7	137005	113333	50877.6	108842	117317	326127	124935	141371	96255.1	177380	83366.7	92452	170276	78574	98550.1	80187	154580	133362	83097.7	128041	121956	32450.7	40008.8	64136.6	63739.3	102185
M55T30	1.5611	2.5611	-3.72748	0.000743951	0.000394	DOWN	55	55	55	29.7028		29.6907	29.7339	26	14	12	160000	203374	77657.7	130276	45226.6	244582	162658	240087	256775	119916	187704	191433	435647	173028	264478	172225	306619	127950	156691	238654	123015	139228	112859	271248	196953	149112	181282	188332	79721.3	54905.4	137395	106557	149706
M165T30	1.60538	2.60538	-6.31568	1.10102e-06	1.6433e-06	DOWN	165	165	165	29.8979		29.8938	29.9321	39	20	19	65752	113746	28986.1	70852.8	11332	151371	138159	147104	149506	96713	104885	108532	89299.2	106045	153622	147443	149506	127824	92202.2	74274.4	87509.6	85162.2	87294.6	134433	73412.7	84360.4	78835.9	77673	68549.7	74174.9	92651.6	85694.7	87292.5
M180T30	1.64024	2.64024	-6.25736	1.28384e-06	1.87343e-06	DOWN	180	180	180	29.8997		29.8938	29.9321	42	21	21	40936	66062.9	17594.4	40276.3	6860.98	88898	78753.9	84348	85631.9	64211.1	58455.9	67659.3	52459.2	63886	81607.1	95215.6	93609.2	67178	50295.6	41047.4	51013.2	51507.4	49059.1	74178.9	38746.7	49559.7	44528.6	46229	36319.7	44471.4	47932	51874.1	49433.8
M137T30	1.75516	2.75516	-4.72377	4.66973e-05	4.17585e-05	DOWN	137	137	137	29.8997		29.363	29.9241	26	12	9	31168	52502.5	19173.9	29913.1	10610.8	67363.1	40958	63949.4	61000.7	50278.9	51408.4	59495.4	46610.6	40586.9	97978.7	71949.9	93129.1	55792.8	43488	31353	40417.3	31212.9	24526.6	57883.6	34371.8	38796.9	54005.1	29852.3	33892.1	24205	26878.1	30424.3	44170.4
M179T30	1.74026	2.74026	-5.66669	6.55636e-06	7.86858e-06	DOWN	179	179	179	29.9019		29.8901	29.9303	23	14	9	17392	26550.8	8586.35	15256.8	3113.14	39356.5	33045.1	37626	36422.6	18238.7	21219.4	23968.5	23626	23893.8	38257	38823.4	34740	25520.9	23891.7	13615.7	19200.8	19922.6	18427.2	32998	13866.2	20906.1	13981.4	17155.5	15138.8	16674.8	17133.3	18367.1	21119.3
M151T30	2.01854	3.01854	-2.65125	0.0129566	0.00451301	DOWN	151	151	151	29.9365		29.8102	30.1907	50	21	12	135040	94622.6	74640.3	46876.8	35206	50596.6	50323.9	67079.9	75689.6	76677.2	79849.5	91917.3	44044.1	102732	316926	297994	117357	122820	60829	34547.6	75359.7	63810.9	54065.2	52045.1	54572.5	97837.8	145917	66858.6	57084.1	14644.3	41959.4	22449.8	67120.3
M150T30	1.99345	2.99345	-5.90429	3.08203e-06	3.98922e-06	DOWN	150	150	150	30.1829		30.1786	30.1911	25	16	9	21336	36620	13165	18370.2	5226.4	56828.3	38770.1	61258.9	46680.5	40216	38807.8	30599.7	43598.5	33056	49615.7	36988.4	45833.3	19314.4	39758.3	23129.4	18922.2	19196.7	20983	55430.5	25001.5	25030.3	17380.8	20313.7	21594.1	13596	24954	27046.8	25750.3
M99T30_2	1.72007	2.72007	-3.91456	0.000395096	0.000243273	DOWN	98.9	98.9	98.9	30.273		30.261	30.2829	19	11	8	19904	28992.8	11732.1	16855.6	8014.9	42741	33907.4	35449.7	28039	20100.1	16256.8	28832.7	59427.2	31864.3	33060.8	49550.3	30774.5	24841.8	22204.9	29333.9	15641.7	14059.6	11688.3	35038.5	24873.3	21163.8	19678.3	15361.3	13407.3	11230.3	12707.7	44717.9	15370.6
M131T31_1	2.09794	3.09794	1.44805	0.162179	0.0431289	UP	130.9	130.9	130.9	30.5127		30.4996	30.5223	18	7	11	194176	32929.9	20135.8	69084.8	112632	33170.1	25762.3	66766.3	88822.1	33594.3	36182.5	20543.3	37676.7	11799.5	35595.7	27706.6	43877.4	30088.1	38303.9	44269.3	4940.4	4852.71	5390.11	21263.3	51769.3	29153	21528	17051.9	32771.2	55546.4	531124	103046	73667.4
M82T31	1.59425	2.59425	-4.97898	2.19602e-05	2.19963e-05	DOWN	82	82	82	31.1984	Eugenol	31.1829	31.5576	25	13	12	17904	51619.8	15437.9	32378.8	8676.66	83334.3	70295.6	73798.9	78368.3	46680.7	53268.7	59802.2	48840.8	52148.6	57079.7	49427.9	51746	38118.8	48971.5	42586	43375	26577.1	29054.9	56941.6	44708	28891	30408.5	27499.6	27346.5	28967.6	54753.3	41947.4	43500.7
M111T31	1.57905	2.57905	-4.10931	0.00026731	0.000176049	DOWN	111	111	111	31.2068	Eugenol	31.1829	31.5732	33	15	11	25160	46712.8	16721.8	29582.8	9235.72	74529	54059.3	77825.3	67668	46371	22520.9	58994.6	71385.9	31118.4	48467.7	55566	52535	35273.1	38833.5	40561.7	41940.9	20913.9	28587.5	48171.6	35852.2	29792.6	31994.1	28309.4	16842.5	11255.6	41661.2	47549.7	47055.8
M100T31	1.59161	2.59161	-5.06523	1.96382e-05	2.01096e-05	DOWN	100	100	100	31.2104	Eugenol	31.1868	31.5616	13	11	2	5411	9013.51	2696.94	5663.15	1383.53	15098.1	12869.4	10769.2	11491.3	8083.3	7333.27	8116.18	7379.18	4654.11	7454.49	13583.8	9803.67	11442.2	7615.93	9274.39	8773.36	7440.8	5532.03	9244.5	6130.66	7193.93	4964.76	4604.75	3332.36	5640.81	5295.07	8271.01	7417.96
M92T31	2.59149	3.59149	7.11133	2.30455e-07	4.10617e-07	UP	92	92	92	31.2331	Eugenol	31.2216	31.2407	12	0	12	13238	7780.18	2451.74	20162.3	7593.05	8567.21	6117.9	12063.9	7252.66	11390.5	10965.3	7957.56	9258.23	6519.49	10479.8	7058.22	9108.51	5114.73	8030.29	8299.48	4738.78	2941.02	4317.41	10218.5	6873.95	6110.25	11835.4	21054.7	15736.6	8310.79	13535.5	13023.1	35118.4
M91T31	4.81294	5.81294	7.76117	1.45138e-07	2.76615e-07	UP	91	91	91	31.2369	Eugenol	31.2183	31.2371	15	0	15	105032	28945.7	8787.09	139314	64571.5	43110.2	16025.9	40433	33645.5	31524.1	20177.7	29732.3	32335.7	32683.8	38639.4	23615.8	37408.4	20878.5	32574	26897.7	20782.5	15066.1	15384.7	42436.3	28944.1	25563.5	79891.7	136504	77688.8	46336.2	71571.4	79552.7	251689
M78T31	3.48732	4.48732	6.88622	7.87317e-07	1.22746e-06	UP	78	78	78	31.2369	Eugenol	31.215	31.241	15	4	11	33936	12139	3461.56	42332.5	19792.5	19846.6	12670.9	13240.3	16035.2	15714.2	12573.2	12579.6	12319	9643	13584.9	14179.8	11852.3	9292.89	13130.1	11472.5	9663.51	4014.89	5473.56	14127.4	13683.9	9820.42	21370.2	28042	25347.7	18144	28783.3	26309.4	76990.7
M131T31_2	17.8793	18.8793	8.34233	5.94975e-08	1.30354e-07	UP	130.9	130.9	131	31.2369	Eugenol	31.2107	31.241	14	1	13	118856	7268.89	2392.81	129963	67355.2	10450.7	7509.51	6534.92	4609.35	8156.49	7905.9	7133.64	6592.25	4814.4	8747.11	7216.71	6740.54	7193.44	8479.32	8106.43	4736.86	3019.21	4995.99	14528.1	8548.91	6626.95	55791.7	91640.7	75107	47560.3	47587.9	55482.1	246188
M165T31	10.894	11.894	8.5738	3.66234e-08	9.03402e-08	UP	165	165	165	31.2369	Eugenol	31.2211	31.5345	22	0	20	47376	5331.92	1888.72	58085.8	28132.9	7647.41	3259.8	7512.44	6166.84	7187.84	4454.77	5804.24	6519.46	3766.96	6350.46	4305.47	8093.92	2444.23	6014.25	5117.92	4053.06	1780.36	3495.71	8518.82	4071.19	5405.24	29543	49321	31093.9	19469.5	25075.8	30871.6	102750
M164T31	58.0718	59.0718	8.76243	2.77477e-08	7.36183e-08	UP	164	163.9	164	31.237	Eugenol	31.2255	31.5695	20	1	19	431296	8616.69	2077.82	500386	257177	12654.6	8256.06	11841.9	7888.64	10752.5	7557.37	10106.3	7064.17	8557.26	10066.6	7292.01	8764.77	6389.48	9788.68	9781.58	7156.2	5235.93	6925.87	10995.9	9101.82	4772.74	231398	405711	201051	156359	217422	250793	909010
M105T31	1.68663	2.68663	-4.57155	9.00677e-05	7.12455e-05	DOWN	104.9	104.9	105	31.2392	Eugenol	31.215	31.272	28	18	10	117344	188079	69894.9	111511	31711	317786	184870	303575	232172	224620	220869	192587	281907	150395	225942	178082	181024	89054.9	227938	113583	104576	68055.3	96068.8	240521	159338	156686	108051	132471	129631	107024	185702	131364	99665.6
M112T31	1.75069	2.75069	-5.42287	5.81592e-06	7.08499e-06	DOWN	112	112	112	31.2567	Eugenol	31.2099	31.5732	57	21	20	47440	85463.7	26826.8	48817	15470.9	141669	92395.9	124946	112623	95397.3	91550.4	89780.9	114356	72698	98439.7	86182.2	93829.9	48894.4	87657.5	59894	60806	41512.8	41926.1	105605	66471.9	68100.7	50188.1	48045.7	50761.8	47204.5	82430.9	72098	63613
M181T32	6.65902	7.65902	17.1179	3.55271e-15	4.43107e-14	UP	181	181	181	31.5345		31.5306	31.5495	22	2	20	31656	8518.7	4176.1	56726.2	12211.1	13932.9	13456.5	13396.3	17590.3	10711.2	7944.49	10037.4	8427.59	6890.97	7898.05	14069.7	11407.2	6144.6	6177.1	3717.7	4471.5	4133.29	2371.09	4490.95	6491.26	5132.56	44123.4	54335.6	44395.5	51715	76665.1	41307.1	59171.8
M196T32	4.48444	5.48444	13.5209	2.68674e-13	2.70887e-12	UP	196	196	196	31.5347		31.5342	31.5534	15	1	14	12638	4897.41	2125.09	21962.1	5379.13	8386.91	6482.69	2833.94	5794.12	5852.47	2141.38	4701.08	6593.26	6125.63	9232.22	7587.39	4919.22	4325.76	3865.75	4242.12	2670.05	3280.38	1593.23	3760.08	6363.07	2094.81	19943.4	21873	14383.4	21737.8	27558.8	15917.2	18775.1
M120T32	2.07177	3.07177	-4.18363	0.00024916	0.000166478	DOWN	119.9	119.9	119.9	31.9559		31.9476	31.9681	31	18	13	46656	64684.3	33140.9	31221.8	15657.2	117496	71752.8	139606	69439.7	67247.2	59264.8	44100.3	83689	48465.1	114204	57594.7	90697.9	34560.5	79255.4	31802.4	24837.6	18293.6	31815.2	93036.2	29564.3	51646.7	19915.8	13875.9	45677.3	27687.9	73030.8	55527.4	46671.8
M183T32	1.94742	2.94742	-3.89274	0.000756075	0.000398523	DOWN	183	183	183	32.1832		32.1554	32.1921	40	20	20	72696	84340.9	46836.2	43309	11814.2	123021	120664	108495	153410	108241	110005	201284	54458.7	103276	101729	123130	82603.9	71092.6	55785.8	34227.6	32957.5	22497.6	29855.9	37139.8	52073.5	45211.3	52003.2	48510.8	51699.4	54407.4	71215.5	38439.3	40999.2
M198T32	2.12157	3.12157	-3.97833	0.000633504	0.000350719	DOWN	198	198	198	32.1842		32.1784	32.1913	27	15	12	32256	34800.9	20666.9	16403.4	4687.51	55198.1	50129.2	44547.9	67211.3	38203.8	48707	85529.8	22494.3	42245.5	42730.6	51888.1	31976.9	32274.1	19697	12795.9	12791.7	9986.33	8820.72	12704.4	21756.4	19129.1	20113	16879.4	19104	22841	28340.2	14810.1	17208.4
M239T33	5.52611	6.52611	4.35653	0.000184372	0.000130495	UP	239.1	239.1	239.1	32.6313	Ethyl hexadecanoate	32.3606	32.6394	15	3	12	71464	11554	19978.5	63848.5	51251.6	12396.9	11941.5	32568	33654.1	25477.6	86634.9	1245.73	1615.55	1709.72	2647.98	3275.73	2145.44	4336.72	2578.29	5045.51	369.008	865.304	910.923	5459.16	3803.07	3952.34	60101.8	93785.2	38970.6	3893.96	65809.7	25795.2	87084.6
M56T33_2	1.9829	2.9829	2.99936	0.00499731	0.00201859	UP	56	56	56	32.6314	Ethyl hexadecanoate	32.6236	32.6356	18	3	15	37208	22491	18488.7	44597.3	28265.3	29773.8	22778	63397.7	70708.1	26288.3	56773.3	14304.7	24984.3	10026.9	17489.2	17503.5	16235.3	11470.8	15425.5	17971.2	6149.8	6671.45	5085.17	13549.6	12331.8	13392.6	62615.7	59675.8	33292.3	7113.22	55810.4	24853.8	56261.5
M143T33_2	3.22688	4.22688	4.15203	0.000301078	0.000194095	UP	143	143	143	32.6314	Ethyl hexadecanoate	32.6237	32.6394	18	3	15	54424	16586.7	15632	53523.2	37650.6	26720.7	18620.4	40854.5	38564.6	31747.3	64441.3	7994.97	8630.33	7598.83	12715	14874.8	9562.77	8834.95	9622.57	8695.09	2347.79	2194.06	2717.03	13612.9	10687.8	7282.05	48187.8	72546.6	34182.7	5804.65	67570.2	29295.8	67817.2
M157T33	4.95567	5.95567	4.5944	9.52173e-05	7.43704e-05	UP	157	157	157	32.6315	Ethyl hexadecanoate	32.6193	32.6394	28	8	20	135744	26298.6	38882.6	130327	96200.1	35356.9	25663.7	81483.2	75894	62715	159504	4408.54	6144.83	4818.35	11273.2	7308.49	9262.57	4809.84	7751.69	16444	2281.11	1368.26	3587.38	13469.7	8610.36	10115.6	117974	177705	82845.4	10137.9	149935	58934.4	174052
M89T33	5.56102	6.56102	4.71739	6.96418e-05	5.80236e-05	UP	89	89	89	32.6315	Ethyl hexadecanoate	32.6262	32.6471	22	4	18	128512	22482.4	36890.9	125025	92529.5	28405	17794.5	57155.9	75638.7	48006.8	157380	5597.67	7621.4	4568.04	6055.95	4948.31	5128.9	3799.63	6225.39	14033.1	1290.44	2437.61	2690.64	7136.82	6767.31	9448.76	106842	171906	78304.7	7591.78	142096	60048.2	167717
M102T33	5.34469	6.34469	4.82405	5.02776e-05	4.43581e-05	UP	102	102	102	32.6315	Ethyl hexadecanoate	32.6237	33.1127	20	3	17	37800	6968.3	11015.3	37243.4	26566.6	9175.39	5514.64	19954.9	17596.6	14280.6	48369.5	934.185	2179.25	1346.75	2736.69	2179.29	1796.68	1480.21	2365.45	3976.18	565.753	829.622	1430.08	3330.31	3207.21	3085	34078.1	51575.1	23644.1	2223.82	40385	13049	50186.3
M97T33	1.89736	2.89736	2.83751	0.00777954	0.00293102	UP	97	97	97	32.6315	Ethyl hexadecanoate	32.6198	33.1514	20	6	13	61704	35428.4	26094.6	67220.4	44218.7	96410.6	36845.1	64069.6	62558.3	54401	88900	22231.7	31399.6	14725.5	21194.9	65872.3	25542	15785.9	22953.8	20575.8	10383.8	10072.1	8860.45	32073.9	23013.7	16127	70867.4	91260.3	34980.4	14294.9	79450.2	39147.4	92625.3
M57T33_2	2.33232	3.33232	3.89378	0.000553401	0.000316806	UP	57	57	57	32.6315	Ethyl hexadecanoate	32.6237	32.6394	21	3	18	120280	60883.4	40087	142000	86640.7	88728	74449.2	122876	116293	83539.4	185899	42968.2	54578.5	36554.6	51638.8	46592.3	42805.4	31431.8	42706.5	49952.3	24448.9	20093.5	20864.5	55001.8	45916.4	41215.2	181354	179960	96716	27870.3	158067	85974.1	182457
M69T33_2	2.13014	3.13014	3.5757	0.00116951	0.000571795	UP	69	69	69	32.6315	Ethyl hexadecanoate	32.6236	32.6394	23	4	19	99528	57136.6	39719.9	121709	72599.9	76196.6	60934.2	95687	157931	80786.4	165831	39775.6	46209	32507.8	40472.2	40150.8	38702.6	33439.8	48241.2	45268.5	26335.9	15507.7	21310.2	45262.4	48104.1	41213.6	123839	164341	89878.7	25063.7	138331	74522.4	164925
M84T33	3.10546	4.10546	4.05837	0.000394763	0.000243107	UP	84	84	84	32.6315	Ethyl hexadecanoate	32.6236	32.6394	14	2	12	31512	10075	8926.63	31287.5	22226.9	14449.6	13690.1	24044.3	24157	16132.5	37346.8	4527.26	7584.84	4505.98	4800.75	9385.15	6224.97	4408.73	4317.78	7158.14	2206.1	2611.15	2853.84	8834.08	6835.08	5500.93	25290.7	39179.5	23092.7	3911.98	35705.7	18501.8	45833.1
M71T33_2	2.44409	3.44409	3.50452	0.00140654	0.000668301	UP	71	71	71	32.6315	Ethyl hexadecanoate	32.6237	32.6394	20	4	16	62696	27715.2	25365.8	67738.5	45777.1	38278.2	25502.5	58874.3	101307	42148.8	86539.4	18064.1	21495.1	13077	13780.1	21103	19604.9	9808.61	18251.7	20261.9	11224.6	5577.25	8020.01	21302.2	15941.8	11857.1	64673.6	90254	36024	8251.85	75920.7	39188.9	93222.2
M58T33	1.77063	2.77063	2.18385	0.0349051	0.0107937	UP	58	58	58	32.6334	Ethyl hexadecanoate	32.6198	33.3051	16	3	12	9286	6573.86	7379.6	11639.9	7651.68	6227.7	2947.09	8668.44	9053.45	7557.42	12686.2	2588.17	18511.6	3487.97	2472.97	33222.9	3682.81	2886.19	4276.38	3986.24	1905.42	1714.36	1821.13	4195.6	2830.73	3328.31	7447.71	14833.6	8417.23	1677.13	12720.9	26290	14933.3
M83T33	1.72158	2.72158	2.35675	0.0235599	0.00755877	UP	83	83	83	32.6335	Ethyl hexadecanoate	32.6236	33.1396	24	6	16	75360	50670.6	45945.4	87233.5	54253.6	156119	129703	75757.4	67760	47653.7	111314	22973.8	30306.4	20909	29463.3	146293	34800.6	21802.1	29049.5	28866.9	12448.5	11866.3	11630.4	32519.7	24998.3	17847.7	84177.8	112750	55720.1	16485	105625	44761.8	119284
M55T33	2.39735	3.39735	3.92075	0.00055433	0.000317206	UP	55	55	55	32.6353	Ethyl hexadecanoate	32.6237	32.6394	15	1	14	160704	74932.4	46900.2	179639	113037	116432	70947.8	133464	139668	110782	223948	62108	61646.2	45431.7	73865.9	55725.2	58567.6	46578.3	53238.9	58217.3	37319.2	22951.3	29522.7	78247.7	52181.3	42738.2	190382	241397	122574	27604.4	221016	102729	223950
M241T33	5.31255	6.31255	4.62779	8.55664e-05	6.8448e-05	UP	241.1	241.1	241.1	32.6354	Ethyl hexadecanoate	32.6223	32.6431	25	5	20	83560	15211.3	24727.1	80810.6	60068	20813.8	11534.2	47398.4	46849.9	35824.7	102679	2905.68	4240.5	1628.72	3594.04	3393.65	3361.93	1950.6	4227.22	8082.22	1775.69	735.066	1715.11	6503.65	4695.76	5526.08	74683.7	110687	52924.7	6421.22	89024.7	37559.6	108777
M185T33_2	4.78689	5.78689	4.50133	0.000124044	9.32385e-05	UP	185	185	185	32.6354	Ethyl hexadecanoate	32.6275	32.7922	15	2	13	31232	5668.59	8055.2	27134.9	20315.1	7609.83	4868.55	16697	12545.6	10051.3	35331.3	1991.13	1956.31	882.965	7385.9	1612.65	2676.11	812.592	1642.36	2602.46	1148.59	480.176	1137.02	2936.68	2314.49	2357.46	20506.2	33343.8	18596	2047.82	31672.6	14720	34595.7
M85T33_2	2.05871	3.05871	3.03086	0.00468286	0.00191184	UP	85	84.9	85	32.6354	Ethyl hexadecanoate	32.489	32.8734	22	6	12	33592	17416.4	14707.1	35855.3	23684.3	52007.1	12974.7	24685	22050	17066.6	47695.4	7950.5	30598.4	6374.48	9570.24	8601.53	10001.6	5899.62	41217.8	8945.69	3410.96	28280	3426.39	10208.1	8990.05	5789.18	34762.2	49200.5	21209.7	4231.3	42360.3	17393.1	48060
M243T33	1.91826	2.91826	-5.9887	1.16479e-06	1.72352e-06	DOWN	243.1	243.1	243.1	32.7458		32.2761	32.7679	41	21	15	17616	40517.7	12905.5	21122.2	7329.29	51565.5	31179	64220.1	39399.6	48496.9	47797.8	47855.6	41455.2	38771.4	37216.3	29549.7	41076.9	12959.4	53157.6	55366.3	37820.8	15273.8	29748.9	46636	53215	28110.8	23265.3	25507.6	23087.2	14338.8	34864.8	29525.3	36397.6
M69T33_1	1.61525	2.61525	-3.29853	0.00290855	0.00127962	DOWN	69	69	69	33.1197	Decanoic acid	33.1088	33.2204	26	12	14	61192	139285	69371.5	86231.4	24905.6	239885	361909	189797	191555	97490.5	87673.9	160909	154452	93570.8	106144	213009	108955	138078	112900	119653	103199	79119.9	65311.7	119523	97541.2	84318.2	100918	68105.9	56497.5	74459.3	80254.2	154211	130107
M56T33_1	1.5355	2.5355	-3.36958	0.00183322	0.000847658	DOWN	56	56	56	33.1235	Decanoic acid	33.108	33.3422	22	11	11	28984	55221.3	21633.6	35963.1	14763.2	103010	82674.4	78238.5	78711.9	45640.6	36483.9	62347.4	58893.2	35797.1	45645.1	102019	39778.3	48226	45815.1	55249.7	41860.1	38259.5	27763.1	53353	41998.9	37883.2	46202.7	31768.5	20658.4	27840.6	30609.6	71755.9	54593.7
M143T33_1	1.63702	2.63702	-3.0907	0.00397906	0.00167189	DOWN	143	143	143	33.1315	Decanoic acid	33.1118	33.1637	24	13	11	28552	56493.2	27527.5	34509.7	17454.6	127172	79258.1	80496.7	86678.1	39356.3	38327.5	67087.1	77705.8	41789.7	46804.8	109278	40460.5	50658	43174.2	52160.2	32176.6	25310.3	22332.6	43327.9	37842.9	44959.2	46382.2	26467.6	15847.1	28277.1	31964.8	75834.5	45338.2
M185T33_1	2.06971	3.06971	-4.87719	4.40924e-05	3.98223e-05	DOWN	185	185	185	33.2093		33.1855	33.2251	40	20	20	44568	57345.6	25759.8	27707	10580.8	105640	71820.7	74922.2	82527.5	22314.6	36636.1	94795.6	105464	61110.8	48020.9	72482.6	57441.2	42507.6	43069.6	44687.9	33555.1	23360.8	25357.9	41683.3	42520.1	74338.6	49241.9	25552.7	21457.2	30486.8	21306.1	35191.7	25526.2
M138T33	2.44904	3.44904	-4.24925	0.000237719	0.000160419	DOWN	137.9	137.9	137.9	33.4825		33.4652	33.4945	24	15	9	56488	60127.9	35572.4	24551.6	14374.6	139263	77806.2	136318	86799	81604.4	52343	43778.4	69392.3	37251	80413.9	77030	72829.7	29895.7	63944.2	16797.3	13960.6	18821.2	21896.3	76061.9	24443.4	42036.9	11025.1	10958	29449.7	23943.9	53449.5	59827.7	39341.5
M120T33	2.3546	3.3546	-4.65839	7.77979e-05	6.34686e-05	DOWN	119.9	119.9	119.9	33.4836		33.4652	33.4941	36	19	17	74680	94024.8	49110.7	39932.3	20485.8	205664	126847	193912	125511	114531	85256.3	74231.5	125756	69412.6	110740	112741	107541	48788.2	103034	35216.6	27414.4	26492.7	39249.2	118123	51982.6	72076.4	16300.2	16303	44235.2	39600.2	84829.9	86260.1	64402.1
M112T34	1.97629	2.97629	-5.06986	2.29044e-05	2.274e-05	DOWN	112	112	112	33.5068		32.6275	33.5327	59	21	16	25048	46873.9	19036.9	23718.1	8698.95	87136.3	55254.2	73841.5	72849.3	46173	50650.5	60544.6	69280.9	40624.6	48831.5	53074.2	43751.9	24803	44050.8	25735.9	29680	13775.7	20166.4	53531.8	36127.1	34469.2	20160.4	22640.2	19525.8	24092.6	38900.6	35596.8	32707.9
M191T34	2.39213	3.39213	-4.58258	8.05768e-05	6.52724e-05	DOWN	191	191	191	33.7785		33.764	33.7933	38	20	18	184320	200277	104714	83723.1	51182.4	280230	228627	198444	187445	247314	155493	313844	269639	384765	360282	406556	204756	87894.8	177639	132143	90877.3	85154.9	71019.1	135152	120464	68072.5	111869	85067.7	102087	63427.2	74950.5	204573	238488
M69T34	1.51552	2.51552	3.53299	0.00124252	0.000601479	UP	69	69	69	34.1857		34.1745	34.6037	25	6	18	62752	65619	22690.1	99446.8	37555.1	124947	92805.1	54484.1	79740.8	61001.8	47419.9	50183.3	63013.9	44242	47007	62854.3	99692.3	84083.5	62206.9	94796.8	55263.2	40529.8	44330.5	74708.5	46796.5	47892.3	129591	82817.4	63428.9	52930.5	52922.8	97346.9	120188
M148T35	1.99307	2.99307	-6.73879	4.59012e-08	1.07003e-07	DOWN	148	148	148	34.6094		34.602	34.6306	14	11	3	10015	20776.1	5239.96	10424.2	4700.99	25128.3	12473.1	20484.5	20384.8	22100.8	18939.3	25539.5	23587.3	20508.3	21736.4	13299.8	21408.2	16392.3	28919.4	30706.8	18447.3	14235.2	14528.4	25076.2	27437.3	14965.6	20423.9	11532.8	9441.57	6718.31	14132.7	8844.27	12128.7
M122T35	1.81701	2.81701	-6.7442	4.68118e-08	1.08624e-07	DOWN	122	122	122	34.6113		34.5999	34.6235	30	18	12	31464	59450.2	13710.3	32718.7	11914	68170.3	33730.7	70103.3	47876.3	58941.3	56461.3	65771.6	63972.5	58952.9	69691.4	50039.1	64016.3	49073.7	81656.6	82359.9	50756.8	34016.8	47572.3	73596.3	73036.9	48658.3	51890.5	31863.7	38896.6	26243.1	46944.8	31916.3	48459.1
M121T35	1.78499	2.78499	-6.45722	1.25178e-07	2.42527e-07	DOWN	121	121	121	34.6114		34.6003	34.627	42	21	21	87560	169511	40772.4	94964.3	33711.7	199953	105297	194014	158974	172692	160975	190446	189694	174272	177076	128375	179507	137349	231757	234533	142635	88592.3	129068	210146	226551	127819	150452	113743	116981	70135.1	110955	97003.3	116001
M138T36	2.38939	3.38939	-3.93814	0.000556048	0.000317947	DOWN	137.9	137.9	137.9	35.5759		35.1649	35.5837	54	20	19	294528	253221	159949	105977	61425.7	610266	450671	515097	471713	407589	266459	279985	235599	117874	220881	320021	268899	179172	197594	56220.5	67186	70768.9	71377.2	245977	100041	164245	35605.4	58975.7	115281	127232	299023	213136	159858
M109T36	2.30656	3.30656	-4.18746	0.000291047	0.000188574	DOWN	109	109	109	35.5759		35.166	35.5837	53	20	20	200128	189391	109637	82109.6	41994.2	438919	321077	361947	339248	295861	195392	206668	187693	98991.2	170945	232385	200732	136443	156469	60964.8	62788.9	60549.1	53703.7	185731	84785.5	125919	36097	42536.4	89283.5	94083.9	214159	152520	122659
M124T36	2.40615	3.40615	-3.99559	0.000472671	0.000280646	DOWN	124	124	124	35.5759		35.164	35.5843	45	21	16	116888	101556	63369.6	42206.9	24849.9	242955	177071	203476	191615	164480	103282	112933	98932.8	45786.4	89930.9	127960	107349	66876.5	78739.2	24700.6	29463	29890.6	32787.1	101187	38086.9	65171.2	14150.4	19931.1	45554.5	52016.5	117941	86316.2	63792.1
M69T36	2.12703	3.12703	-3.91631	0.000594523	0.000334491	DOWN	69	69	69	35.5759		35.1658	35.8073	43	19	18	206848	196076	113739	92182.8	42921.5	445377	335850	383417	352830	297332	205410	215204	192230	93878.4	173570	238148	210711	142003	173272	66820.3	75378.3	58051.1	54032.1	200873	70809.7	132388	41727.3	46085.5	97025.8	95420.6	220513	167435	129022
M83T36	2.07943	3.07943	-3.66	0.00112515	0.00055347	DOWN	83	83	83	35.5759		35.1658	35.7955	39	18	18	97176	89254.4	53985.8	42922.5	21231.7	212326	153179	175912	165546	135462	96700.8	94345.4	94081.1	47851.8	71561.8	108970	97195.4	64182.3	71549.6	27806.2	20746.8	24845	27420.8	86277.5	34953	63430.4	18537.3	22646.3	44785.8	43917.4	106093	76971.1	58372.1
M120T36	2.32219	3.32219	-4.15589	0.000309245	0.000198549	DOWN	119.9	119.9	119.9	35.5759		35.1697	35.5865	47	20	20	185280	167455	97782.6	72110.8	38619.7	383048	288541	326637	300838	260677	174221	188378	163254	81333.1	151076	207194	178707	120042	128239	46434.9	60545.6	50951.5	51814	168018	76440.8	110160	31886.8	37569	78420.1	82954.8	193320	139690	106262
M82T36	2.29717	3.29717	-4.0329	0.000409605	0.000250472	DOWN	82	82	82	35.576		35.5628	35.5837	27	16	11	57744	55076.7	32590.2	23975.9	13666.5	121323	97243.6	108546	101573	86724.7	60953.6	66091.4	58747.2	23117.4	51594.3	66102.1	55915.9	35708.5	38996.5	22039.4	20184.9	12237.5	17412	55053.4	20727	36318.2	9312.09	11993.1	18676.5	28700.7	67007.3	45770.5	36751.5
M121T36	2.32942	3.32942	-4.15651	0.000330389	0.000209915	DOWN	120.9	120.9	121	35.5798		35.5628	35.8087	47	18	17	143232	132039	78226.3	56683.1	27980.4	307918	224669	257735	232464	210805	141409	148280	130314	43961.2	120397	162189	137916	89251	113064	69374.6	31582.6	46465.3	41981.4	132696	42728.1	87609.9	41400.5	26599.2	66552.9	66483.9	140080	108290	82976.3
M198T36	2.20277	3.20277	-7.45003	1.59671e-08	4.78931e-08	DOWN	198	198	198	35.7305		35.7154	36.4002	43	20	13	16648	27644.7	7985.1	12550	4737.92	35922.5	18971	30738.4	26998.6	30107.1	27465.7	32969.9	30428.2	26567.9	27800.4	20108.8	29123.8	13112	39622.9	42295.4	27212.3	14037.2	17055	35827.1	33597.1	20578.1	18200.2	12373.4	16903.4	10670.3	11401.8	14580.1	17487.9
M105T36	1.91656	2.91656	-4.48374	0.000134057	9.95582e-05	DOWN	104.9	104.9	104.9	35.9586		35.4548	36.5287	30	18	9	102008	106949	48823	55802.5	18677.8	89611.4	113844	95530.7	124411	72248.8	71869.1	47940.1	121407	43888.4	88631.6	65131.9	89000.7	66469.6	126331	108767	107455	112088	85258.3	242332	167254	206456	69670.2	45821.2	58888	36564.1	97403	44892.9	52462.7
M50T37	1.82062	2.82062	-3.82765	0.000886895	0.000451074	DOWN	49.9	49.9	49.9	36.5248		35.9684	36.5286	33	14	11	52088	37438.3	19588.9	20563.5	4943.41	110450	46907.6	38586.4	26615.2	26007.4	19538.9	45288.3	45464.5	24271.1	33064.5	49820.3	38779.7	34728.2	25873.9	43338	23075.2	20805.8	16416	47303.7	34516.1	35353.8	28135.4	19163.7	16169.2	15900.2	20923.9	35472.1	21239.3
M56T37	1.67324	2.67324	-6.13422	7.26571e-07	1.14664e-06	DOWN	56	56	56	36.5248		36.5209	36.5327	35	18	17	67424	95763.5	24893.7	57232.5	14452	115894	123688	110404	107037	75799.8	73310.9	116745	114564	85542.9	106647	129451	105191	92295.7	76902	110606	67007	41703.8	48542.5	126802	100301	82600.1	69178.6	50234.3	50234.2	49492.2	54876.5	108240	62396.9
M149T37_1	1.65095	2.65095	-6.22735	5.12972e-07	8.46013e-07	DOWN	148.9	148.9	148.9	36.5248		35.982	36.5288	43	21	21	2020864	2.77158e+06	689853	1.67878e+06	413277	3.75336e+06	3.63925e+06	3.05847e+06	3.30436e+06	2.29775e+06	2.02063e+06	3.53303e+06	3.11565e+06	2.33739e+06	3.11428e+06	3.69213e+06	3.04303e+06	2.59174e+06	1.90927e+06	2.92727e+06	2.21748e+06	1.64073e+06	1.45821e+06	3.46507e+06	2.65177e+06	2.43235e+06	2.08125e+06	1.57686e+06	1.38466e+06	1.42318e+06	1.57023e+06	3.0777e+06	1.7592e+06
M104T37	1.66866	2.66866	-6.20288	4.71462e-07	7.85886e-07	DOWN	103.9	103.9	104	36.5248		35.982	36.5288	40	20	20	138496	187841	46873.6	112570	29920.3	243006	252622	211164	231860	154628	140653	228577	218777	155337	209295	251446	206823	172178	134357	203122	147443	108778	102144	235785	187397	149277	142294	112755	88462.1	95259.9	143988	209482	123056
M57T37	1.6425	2.6425	-6.23461	5.00839e-07	8.2857e-07	DOWN	57	57	57	36.5248		36.5209	36.5288	42	21	21	263616	365530	90130.3	222545	54054.3	503129	479877	408113	439785	304636	273084	459107	418816	314160	406965	473823	397106	342903	260766	390132	286996	213233	190158	451425	341563	320355	273754	215936	182214	181387	210343	403277	230201
M121T37	1.71163	2.71163	-5.9394	1.10635e-06	1.65006e-06	DOWN	120.9	120.9	121	36.5248		36.3155	36.5288	30	15	15	40368	62130.2	16945.3	36298.9	10491.5	81102.7	77854.8	72257.9	74222.3	47501.4	45418.4	75741.3	87654.6	51924.6	67297.6	79142.3	68079.6	59831.8	46095.8	70425.2	45137.2	31319.5	30743.1	83079.4	53399	56504.6	48781.4	37740.6	32715.5	32688.2	34947.5	65463.2	41583.6
M167T37	1.68328	2.68328	-6.00975	1.06298e-06	1.59477e-06	DOWN	166.9	166.9	166.9	36.5249		36.5247	36.5288	41	20	21	64168	82884	22235	49239.6	12796.9	114239	112101	92388.7	98386.7	68626.1	61037.9	106720	95294.8	71203.5	92074	112408	92151.8	76140	56803.2	84669.4	65452.4	42454.3	41162.7	106543	80744	69961.6	59369.3	46520.2	39498.1	41757.5	46987.1	93452.5	53100.4
M224T37	1.80362	2.80362	-6.26901	3.60379e-07	6.1846e-07	DOWN	224	224	224	36.5249		36.5247	36.5288	31	19	12	19536	24610.7	6698.14	13645.1	4402.95	34540.3	33348.8	26915.7	31159.1	19412.2	14733.8	30471.9	27977.3	21286.9	27973.4	34176.6	25828.6	23377.9	17220.3	25784.1	20208.5	13366.7	12627.8	30350.1	24394.2	21669.5	18419.4	11005.8	9794.67	10608.2	10663.6	28590.4	15304.1
M132T37	1.66115	2.66115	-6.05239	7.53725e-07	1.18301e-06	DOWN	131.9	131.9	131.9	36.5249		36.5209	36.5288	39	19	20	32280	45335.2	11545.7	27291.5	7303.62	61687.4	58730.8	50806.1	54950.4	37589.7	31711.8	58095.2	54893.5	39069.3	48920.9	60585.2	50841.1	38266.2	34420.9	49356.9	34105.2	24169.1	24057.9	52563.7	46033	41185.4	36669.4	27849.1	21796.9	22723.7	26660	50007.4	29407.5
M223T37	1.66816	2.66816	-6.12609	7.11323e-07	1.12604e-06	DOWN	223	223	223	36.5287		36.5247	36.5288	42	21	21	148288	195450	50406.5	117165	29808.6	265764	259378	217487	235760	160717	136980	254835	221922	158986	214385	262959	216018	186476	135320	206908	156937	113747	99512.7	242644	188501	169222	140682	109617	97228.3	98096.8	110992	221501	120568
M149T37_2	1.61994	2.61994	-5.47605	2.70174e-06	3.58045e-06	DOWN	148.9	148.9	148.9	37.3527		37.3489	37.3567	41	21	20	58536	90542.9	21819.5	55892.9	19097.3	124840	104161	98546.8	102868	67068.6	70457.1	97135.9	109746	77305	103568	107902	93662.4	75011.4	75372.8	117289	75030.6	49856.3	46367.6	120154	93651.4	91407	81480.4	50618.2	39772.7	45799.8	48524.1	99925.4	48763
M132T38	1.60522	2.60522	-4.10719	0.000208867	0.00014459	DOWN	131.9	131.9	131.9	38.2821		38.2744	38.2861	21	13	8	13498	22130.6	5665.89	13786.7	7387.06	27705.5	24213.4	27224	23822.5	13173.7	20688.6	21579	24387.4	15961.8	28900	23841.1	16974.6	14933.2	20576.4	31713.1	23504.6	12923.3	14402.5	21742.3	26053	30423.4	25820.7	11528.6	8232.26	8837.76	12464.4	24025.8	6536.14
M121T38	1.55505	2.55505	-4.33859	9.67821e-05	7.53044e-05	DOWN	120.9	120.9	120.9	38.2821		38.2782	38.2861	37	19	18	51128	92418.6	23059.9	59431.2	26119.8	113023	103220	94706.2	98420.6	101907	90299.7	81919.4	106958	57344.9	118507	102829	78423.9	67244.1	71658.1	122862	90672.2	49808.4	47498.3	116817	105489	121184	102059	44909.7	40320.8	48930.1	43913.7	93297.8	64092.2
M56T38	1.53359	2.53359	-3.7909	0.000506741	0.000296229	DOWN	56	56	56	38.2821		38.2782	38.2861	32	19	13	64280	112723	30985.5	73502.6	35884.5	136471	125708	125292	120688	60434.8	107454	109049	141678	88433.8	138564	132965	98304.8	77265.2	97942.8	152086	109253	65957.1	47241.8	136671	137759	157962	133657	50340	45014	55625.1	56484.9	111920	67343.2
M122T38	1.5798	2.5798	-4.0158	0.000254314	0.000169168	DOWN	121.9	121.9	121.9	38.2822		38.2782	38.2861	20	14	6	36880	58211.8	16794.2	36847.6	17672.5	71315.9	68008.1	63802.1	56522.7	34327.1	49871	54780.4	71522.1	46263.1	76151.5	71317.6	46224.3	31251.5	50168.8	83322.7	63781	31019	35445.9	75185	56947.6	85221.5	71006.8	28396.7	26324.5	26141.6	29642.5	63349.8	27336.2
M50T38	1.52984	2.52984	-3.78714	0.000514677	0.00029979	DOWN	49.9	49.9	49.9	38.2822		38.2782	38.2899	24	14	10	24632	40363	10956.8	26383.8	12887.2	45735.8	47839.6	45888.8	46171.2	20906	38318.6	40866.4	51154.7	26995.8	45388	48202.5	35547.7	25592.7	42817.2	55796.2	39353.3	22299.3	22354.2	54569.4	39336.7	52489.3	51039.2	22128	17293	18318.6	20837.2	30578.4	24980.3
M149T38	1.50232	2.50232	-3.94556	0.000320798	0.000204789	DOWN	148.9	148.9	148.9	38.2822		37.9179	38.2861	43	21	21	2489344	4.21278e+06	1.06804e+06	2.80417e+06	1.2393e+06	5.06202e+06	4.61327e+06	4.6706e+06	4.5335e+06	2.38095e+06	4.10431e+06	4.19471e+06	4.76794e+06	3.24736e+06	5.31212e+06	4.72949e+06	3.59768e+06	3.06835e+06	3.26505e+06	5.68272e+06	4.3964e+06	2.45128e+06	2.35992e+06	5.27273e+06	4.94513e+06	5.81283e+06	4.83161e+06	2.14442e+06	1.75138e+06	2.25689e+06	2.32789e+06	4.1909e+06	2.4057e+06
M206T38	1.61334	2.61334	-3.99713	0.000275942	0.000180546	DOWN	206	206	206	38.2822		38.2782	38.2938	23	15	8	17176	24702.7	6988.51	15311.5	8190.4	29093	28049.9	22547	26234.3	14559.6	24101.3	26763.2	28889.4	17036.5	33842.6	27331.8	16969.6	16174.2	24964	34115.8	27905.4	14743.9	11775.3	29651.9	27750.3	36258.3	31619	10610	7887.95	14660.4	11466.4	23248.8	12718.4
M104T38	1.51327	2.51327	-3.71498	0.0006224	0.000346149	DOWN	103.9	103.9	103.9	38.2822		38.2781	38.2861	39	19	20	105816	174736	50252.7	115469	53098.3	194393	198588	204073	196389	89667.2	176385	165419	198642	127894	206890	205677	157763	121656	134959	243579	180099	74628.6	96505.4	227091	216735	252430	203722	95146.4	67143.1	82609.4	99735.9	166698	105193
M224T38	1.57644	2.57644	-3.84014	0.000433178	0.000261959	DOWN	224	224	224	38.2822		38.2782	38.2861	26	17	9	16141	24591.9	7206.29	15599.6	7951.11	31160.7	26516.2	28572.5	23933.3	12025.1	24211.5	25984.3	29614.1	20983.2	31878.1	28046.4	20752.3	18301.2	15243.8	31371.3	25885.2	12748.8	11503.6	30816.4	30616.1	36265.3	28034.5	10963.1	8485.45	8951.18	11581	25646.6	13585.3
M205T38	1.51657	2.51657	-3.70827	0.000646919	0.000356184	DOWN	205	205	205	38.2822		38.2782	38.2861	35	19	16	106032	163850	44846.8	108040	52396.8	202943	178799	184346	180540	81811.3	162708	172156	154656	127495	218539	182955	142110	90553.7	132187	235821	179512	100754	97379.9	200908	193482	221194	193527	83967	57901.8	91433.3	83413.9	172790	78480.6
M223T38	1.50604	2.50604	-3.84551	0.000427821	0.000259371	DOWN	223	223	223	38.2859		38.2782	38.2861	42	21	21	123120	202537	53974.9	134483	60527.7	246154	221564	223206	215317	108679	200845	202048	229742	155640	257745	228120	173960	136799	150620	278610	214667	118386	111089	255115	242564	282401	232324	101759	77375.5	110489	111944	202497	113496
M207T41	1.78866	2.78866	-4.64913	5.35301e-05	4.66601e-05	DOWN	207	207	207	40.7404		40.6876	40.797	34	18	16	41920	362905	135844	202892	80144.1	478980	313004	558583	399509	445980	387546	248076	429142	235435	670562	371303	575664	283331	361105	249558	193722	210288	183322	475676	256735	293487	204908	249293	310817	152222	390945	176643	196993
[truncated: 14 more columns]

## Sheet: supplementary table 3
Total Volatiles
Table S3 showing features differences between Norton and Cabernet Sauvignon for total volatiles.
Features (m/z,time)	fold change	log2fold	tstat	pvalue	qvalue	updown	mzmed	mzmin	mzmax	rtmed	rtmin	rtmax	Cab_13b_test	Cab_14_test	Cab_15b_test	Cab_16b_test	Cab_17b_test	Cab_18b_test	Cab_1b_test	Cab_20b_test	Cab_21b_test	Cab_22b_test	Cab_23b_test	Cab_2b_test	Cab_3b_test	Cab_40b_test	Cab_41b_test	Cab_42b_test	Cab_4b_test	Cab_5b_test	Cab_6b_test	Nor_10b_test	Nor_11b_test	Nor_12b_test	Nor_25b_test	Nor_26b_test	Nor_27b_test	Nor_28b_test	Nor_29b_test	Nor_30b_test	Nor_31b_test	Nor_32b_test	Nor_33b_test	Nor_34b_test	Nor_35b_test	Nor_36b_test	Nor_37b_test	Nor_38b_test	Nor_39b_test
M164T31	209.667	7.71196	12.9151	3.66489e-11	2.5558e-10	UP	164	164	164	30.9368	30.9234	30.9479	5718.99	3180.59	3056.17	3586.98	3066.43	3653.11	5642.7	1918.26	3510.59	2743.48	3050.09	9521.93	2172.72	8587.25	3611.44	3413.67	2401.05	2336.91	2298.48	462103	589570	330880	427828	907106	878590	693073	1.00202e+06	850987	1.16548e+06	1.22411e+06	1.00629e+06	1.13613e+06	1.23814e+06	1.27337e+06	606093	701981	602062
M104T31	171.369	7.42096	11.9264	1.51445e-10	8.72417e-10	UP	104	104	104	30.9364	30.9292	30.937	1474.32	651.286	883.824	602.997	854.358	1162.35	895.414	649.223	548.354	817.82	1012.59	1243.53	703.718	839.517	602.567	458.528	788.534	469.711	783.212	64656.4	107282	48194.2	68979.1	151896	156710	108230	177268	149769	201942	210471	180288	196852	219386	226379	107663	123222	106606
M132T31	112.274	6.81088	12.8565	3.95475e-11	2.66717e-10	UP	132	132	132	30.9331	30.9177	30.937	916.806	651.943	416.484	1167.07	457.425	480.743	583.382	231.611	408.451	498.873	390.881	1716.71	161.659	1019.41	324.034	607.423	531.583	454.87	497.665	39122.2	50620.4	26202.8	35506.1	75570.4	74837.1	56578.3	84231.7	71444	97723.1	101118	85022.3	95645.1	103045	107563	50666	59839.3	50053
M50T31	79.4731	6.3124	11.6156	2.37901e-10	1.29038e-09	UP	50	50	50	30.9331	30.9234	30.9408	252.987	552.625	349.209	299.883	149.196	429.462	379.812	122.405	226.854	304.824	127.144	1012.89	74.5519	306.947	427.429	275.939	205.558	129.472	173.89	13690.3	17959	8820.34	11768.1	25979.7	26556.5	20505.8	31376.4	24847.9	37821.7	37345	31395.2	35548.6	37859.6	38124.7	17189.3	19962.5	16411.9
M174T15	79.2876	6.30902	7.40698	3.7344e-07	1.1368e-06	UP	174.1	174.1	174.1	15.1889	15.1595	15.1996	1069.59	1034.21	692.175	521.876	1280.52	324.723	1764.83	650.429	1273.23	833.58	1025.24	3774.07	328.833	1377.86	710.213	917.361	208.571	44.8151	150.708	131773	154431	105002	136197	50738.2	8537.51	46558.5	21869.1	26267.3	22479.2	31386.4	81725.1	85401.8	39619.2	12169.4	128149	121265	108244
M103T31	78.4476	6.29366	12.9898	3.28968e-11	2.40885e-10	UP	103	103	103	30.9331	30.9234	30.937	3679.26	3170.9	3471.08	3056.33	2959.88	1776.19	2861.06	2074.16	3127.61	2198.45	2358.07	6411.96	1814.37	4996.73	2774.79	2624.64	2351.6	1800	2935.62	125971	173536	97950.5	119765	262055	247278	195177	287876	243639	329387	344427	297085	323216	354905	364411	175171	203896	171224
M160T15	69.8257	6.12569	7.30407	4.59264e-07	1.34678e-06	UP	160.1	160.1	160.1	15.1879	14.6029	15.2311	315.501	659.876	315.575	255.219	645.07	685.017	785.438	157.865	1034.71	818.672	331.666	2107.06	41.4821	324.446	205.192	204.761	114.818	0	41.3133	68319.5	82682.4	59979.4	73738.5	26277.7	4803.65	25063.8	12142.6	11787.9	16380.9	15759.2	42384.1	47413.9	18124.3	6930.67	75613.6	65673.8	58445.7
M131T31	68.8702	6.10581	13.0746	2.92664e-11	2.26649e-10	UP	131	131	131	30.9368	30.9234	30.937	3589.91	2557.18	3923.57	3171.56	2942.73	2594.3	4398.13	1634.04	2938.18	3955.16	3908.29	6317.99	2472.42	4583.57	3175.91	3711.01	2899.77	2672.8	1651.8	135382	170848	93915	120403	258086	252518	191880	281201	235011	324069	335663	283720	319157	346966	359767	168066	197773	167474
M174T18	66.4629	6.05448	7.27292	4.86137e-07	1.40939e-06	UP	174.1	174.1	174.1	17.9152	17.8768	17.9214	879.681	2590.19	476.54	584.948	1160.22	302.122	469.733	241.706	1773.57	1073.48	182.767	5913.26	223.221	833.134	512.481	285.298	0	36.9645	0	135018	152325	93297.4	129377	47692.5	9046.18	34978.2	28790.5	23719.1	23658.4	41207.1	66275.9	109528	27635.2	12227.4	117970	120898	123849
M52T31	64.6779	6.0152	12.0416	1.264e-10	7.49171e-10	UP	52	52	52	30.933	30.9234	30.937	0	138.467	643.474	358.979	320.077	604.49	328.377	115.939	293.499	410.845	117.754	932.612	202.729	459.706	358.53	446.036	261.757	160.099	279.627	17753.1	22319.6	11111.1	11314.5	31313.4	31668.5	22866.8	36844.3	30131.6	39628.1	45625.1	38050.9	41407.1	42676.8	45828.8	20320.9	25518.4	19388
M159T15	60.3641	5.91562	7.25215	5.08903e-07	1.46134e-06	UP	159.1	159.1	159.1	15.1915	15.1595	15.1998	4632.77	7300.52	5350.87	5386.61	6897.01	3675.39	7256.19	1905.06	7632.06	7542.15	1013.32	21055.9	1135.59	5683.09	4016.74	2575	771.301	696.879	1415.93	543385	644603	463704	564426	231882	42451.5	170970	94080.8	102973	122403	122421	313523	318189	120781	31371.4	501539	477060	422735
M51T31	59.1043	5.88519	13.0198	3.12821e-11	2.34749e-10	UP	51	51	51	30.9331	30.9234	30.937	1056.93	1343.26	1550.63	1159.96	647.733	1175.57	1602.95	1154.73	1007.24	1116.01	1033.86	3008.92	817.315	2055.27	1209.92	2086.04	1234.12	674.087	645.417	45924.4	59997.9	30953.5	37413	86352.4	82893.4	63590.3	93293.8	80588.7	110233	112576	96869.7	106331	112825	119861	54911.4	66257.2	56834
M63T31	54.4561	5.76702	12.6879	4.88876e-11	3.18201e-10	UP	63	63	63	30.933	30.9234	30.937	569.952	1186.77	976.78	396.418	645.464	878.929	794.079	435.35	567.46	398.241	568.518	2099.94	391.491	908.592	402.848	370.077	671.949	583.888	124.816	23370	28730	15202.4	17033.9	42247.7	41587.1	30969.1	46428.1	38771.5	53720.9	56830.9	46821.7	48453.4	56612.1	57992.5	26737.2	30449.1	26161.9
M160T18	53.8609	5.75117	7.07462	7.34805e-07	1.92776e-06	UP	160.1	160.1	160.1	17.9138	17.8768	17.9253	293.307	637.229	241.366	411.643	267.944	265.938	356.121	0	161.126	396.898	38.1911	1776.5	38.1481	692.67	156.136	245.489	0	0	0	69103	77656.1	49967.6	71114.1	22766.9	3199.71	21303.1	15551.4	8936.94	14165.7	17070.5	37814.8	60331.5	12416.9	4219.66	64596.5	65145.1	61695.4
M66T31	53.7941	5.74938	11.8179	1.75697e-10	9.85703e-10	UP	66	66	66	30.933	30.9177	30.9409	351.247	730.196	1072.54	814.046	611.623	712.328	422.795	380.533	440.406	557.825	644.056	1613.08	589.065	414.044	575.148	756.939	572.312	589.316	455.674	19415.7	24957.4	14220.6	14468.1	41099.7	39343.8	29517.2	44545.9	37874	48506.1	52742.6	48502.5	51529	54434	52511.5	24571.9	30364.5	24760.2
M148T24	51.5171	5.68698	6.8382	1.19946e-06	2.92765e-06	UP	148.1	148	148.1	24.3863	24.0445	24.3959	363.461	646.048	515.073	550.072	364.357	222.173	345.58	358.323	480.765	846.945	637.745	743.396	126.791	362.429	293.568	255.048	212.468	125.734	105.55	38525.3	34120.2	30523	56545	11582.3	3904.61	25870.8	12001.9	9334.65	6971.54	14344.4	22999.1	37888.5	6916.61	5115.46	23986.2	24322.4	14209.9
M78T31	50.1117	5.64708	11.9055	1.54168e-10	8.85399e-10	UP	78	78	78	30.933	30.9234	30.9409	1728.28	1445.41	1419.92	1050.25	1005.71	1196	1931.71	704.194	431.579	732.126	1215.01	2219.29	1109.84	1755.84	839.658	955.791	647.265	583.063	977.856	33156	42689	21082.1	24073	68300.8	64044.1	52779.3	77107	61577.8	77421.7	89966	68365.5	71837.5	93868	96595.7	46263.5	48245.7	45735.2
M106T24	47.939	5.58313	7.9236	1.34122e-07	4.56789e-07	UP	106	106	106.1	24.3798	24.0367	24.4002	2831.34	3635.81	1450.48	1611.62	1483.46	1223.67	1744.63	1110.56	3280.55	2830.12	2415.97	2910.61	572.261	1338.18	758.797	1340.49	337.949	578.317	464.553	81105.6	135584	77105.8	184486	57577.5	16096.6	80241.9	38623.9	40067.3	35531.9	52451	97453.3	170467	42261.6	30007.5	112109	106531	98600.3
M131T18	46.3342	5.53401	7.95633	1.25013e-07	4.31006e-07	UP	131	131	131	17.9094	17.5661	17.9326	501.328	1279.85	519.918	544.441	731.217	270.686	1100.3	424.445	1128.82	1171.48	228.671	3053.28	39.81	860.147	533.69	333.109	0	0	83.1016	62752.2	78381.8	41302.1	67930.7	28972.1	4334.57	21379.4	27587.2	16435.4	20453.3	17995.3	44371.7	66214.7	18894.9	14293.5	65343.8	77946.2	66450.9
M128T18	45.1525	5.49674	7.08322	7.12513e-07	1.88535e-06	UP	128	128	128	17.9132	17.5661	17.9249	1155.03	2231.92	850.426	717.706	973.609	562.941	1131.85	574.012	800.972	1187.89	212.043	4220.11	182.294	725.102	774.539	692.572	290.121	36.5006	134.65	66734.9	80969.7	48679.8	72324.7	20537.8	3187.69	16675.1	18283.1	12374.5	13879.1	19636.1	39177.1	66293.4	19258.8	8340.12	69057.8	77896	68071.4
M64T23	43.7549	5.45137	10.7751	8.70374e-10	4.11178e-09	UP	64	63.9	64	23.0878	22.7122	23.0917	1353.99	3071.19	1572.15	1074.87	1523.79	2466.83	1892.67	1220.21	1080.33	653.843	1319.36	3839.18	1199.43	1428.98	1046.31	883.681	1002.79	903.884	1193.59	1782.24	69655.3	29957.8	77400.2	47024.2	82153.2	70915.8	40326.5	81920.7	90205.5	62580.4	52398	74551.2	89079	105398	43902.2	49119	35519.5
M174T21	42.7708	5.41856	7.39047	3.83499e-07	1.16224e-06	UP	174.1	174.1	174.1	20.6506	20.636	20.6599	766.509	948.358	1349.59	472.025	1618.93	1422.75	1709.06	412.156	1072.91	2002.92	596.036	2576.52	600.316	262.671	517.074	242.751	338.465	188.926	449.63	84309	87728.2	52417.1	49887	21941.2	13604.3	15088	18458.1	15135.9	21535.4	22342.9	38032.3	34449.4	21918.9	11987.1	39308.7	44169.7	35181.4
M174T16	40.4946	5.33966	7.9285	1.32035e-07	4.50938e-07	UP	174.1	174.1	174.1	16.047	16.0312	16.0624	794.659	1475.19	1629.76	1796.77	2104.74	1331.67	2348.11	473.455	2246.67	1946.26	926.547	3157.17	681.644	724.935	781.763	232.941	263.092	268.758	422.225	96729.1	105848	67273.1	57794.6	28025.8	18325.7	21473.3	21303.3	20663.3	34526.2	30952.2	54185.1	55273.2	27705	15709.3	45464.3	49805	48979.2
M131T15	39.4089	5.30045	8.03439	1.07943e-07	3.80938e-07	UP	131	131	131	15.1879	15.1628	15.2227	1682.59	1470.95	1249.94	1650.23	1893.51	979.741	2161.31	712.348	1881.63	1728.8	929.312	3743.24	659.989	2025.64	1624.74	1019.38	722.064	395.353	317.333	93575.7	92561.2	70108.9	98481.2	33695.6	8760.69	25295.5	38272.4	19453.8	24570.6	27733.2	61461	73949.5	34736.5	9864.46	96820	97270.1	86155.1
M117T18	38.4435	5.26467	7.18664	5.78111e-07	1.61334e-06	UP	117	117	117	17.9124	17.8805	17.9214	330.947	1001.67	613.365	465.141	871.872	495.415	593.173	173.13	906.291	751.83	210.174	2150.51	461.654	527.1	520.953	524.194	173.341	135.658	260.157	34022.2	34986	24898	43417.4	10284.8	3069.82	10235.6	11087.1	7077.31	8707.85	11387.5	19057.5	37579.2	9782.9	4314.2	36578.8	44697.2	40319.6
M134T34	34.3837	5.10365	5.89563	9.11355e-06	1.85583e-05	UP	134	134	134	33.9086	33.9021	33.9097	80.5038	114.892	92.0755	0	0	0	0	77.1102	38.2259	114.992	0	247.031	119.572	77.3414	156.083	0	41.7475	41.939	0	9585.19	10878.4	4453.86	5500.01	41084.5	17051.1	21181.4	31062.9	24469.4	46233.2	59758.8	47256	69432.6	65294.4	48060.5	11489.5	15767.5	15556.8
M133T31	34.1558	5.09406	13.3439	1.95299e-11	1.7889e-10	UP	133	133	133	30.9347	30.9234	31.0072	4569.7	4062.35	6198.73	4036.61	5368.46	3322.26	4309.86	2365.47	3640.77	7774.54	4202.69	9064.05	2488.55	4940.33	3686.86	4246.44	3799.97	2062.83	2127.89	88824.7	112738	64439.5	80799.4	168798	158765	122079	182196	154345	206439	218369	182513	204336	218400	229366	111198	122669	113302
M160T16	32.8143	5.03625	7.04635	7.73765e-07	2.00017e-06	UP	160.1	160.1	160.1	16.047	16.028	16.058	371.806	396.954	404.372	508.396	354.485	778.081	511.37	265.832	744.939	736.501	265.715	1180.78	82.7545	429.886	195.265	0	191.181	53.6556	176.214	35665.4	36744.1	21952.5	22170.7	10614	5175.9	5744.66	6554.09	7575.71	6672.38	8436.21	20198.6	17864.9	8367.79	4844.9	15798.9	13822.7	14289.5
M122T31	32.0001	5.00001	12.2255	9.39564e-11	5.78526e-10	UP	122	122	122	30.9347	30.9234	31.0814	2337.36	3012.65	2019.27	2398.32	1724.65	3261.95	2323.9	1264.24	1794.66	1954.23	592.866	3850.89	965.003	3266.34	1230.22	2411.41	1382.56	1271.3	1375.85	39272.6	44772	26996	31480.1	75467.6	71227.1	48046.4	81167.2	69443.9	90557.4	99016.9	78856.4	88905.1	101146	103319	44432.4	56935.7	45885.3
M128T16	29.0172	4.85884	8.70969	2.95507e-08	1.16964e-07	UP	128	128	128	16.0431	16.0101	16.0546	720.557	1255.26	887.51	1190.6	1011.25	614.378	646.705	91.5779	1388.53	1626.21	715.25	2299.45	347.402	981.475	316.404	433.926	556.7	417.313	335.729	46518.3	39824	32192.8	33018.8	13246.8	8500.83	11214.9	12189.1	9791.92	14373.4	14343.1	28780.2	30063.8	18850.2	7558.88	24365.9	25562.4	21739.1
M149T31	28.8987	4.85293	13.1836	2.36899e-11	2.01277e-10	UP	149	149	149	30.9369	30.9234	31.015	8114.91	17201.8	14158.2	9643.23	11092.7	14612.4	7288.29	4668.21	6023.69	6270.62	7318.9	18898.6	4141.78	14031.1	11240.2	9491.64	9408.84	6588.32	4136.79	172732	210829	119507	147738	313150	301263	236104	343254	289178	389222	411757	347897	387345	423540	434898	207520	248171	213042
M92T23	28.728	4.84439	13.2527	2.08094e-11	1.86139e-10	UP	92	92	92	23.0916	22.7194	23.3188	14587.1	18303.7	10637.4	3439.08	9015.56	11337.3	17461.8	16804.4	11414	9938.19	11078.3	36996.6	8202.39	19088.3	7784.41	10831.5	10715	8906.35	8911.31	194099	358410	185681	420936	282000	439892	394450	239320	449228	473616	338624	300637	411181	494577	565553	250139	267655	208198
M77T31	27.6362	4.78849	13.0724	2.77711e-11	2.20297e-10	UP	77	77	77	30.9364	30.9234	31.0165	6966.18	12742.9	6289.85	7942.57	8603.5	6663.29	12311.2	5483.68	15652	7525.31	12093	16282.4	4186.84	6008.67	7791.1	7959.51	7086.76	5322.51	5289.17	142134	180316	100961	127266	266340	253972	198943	290211	245767	330067	346739	299126	326569	352938	365559	173788	205583	177295
M131T16	25.7124	4.68439	9.54827	6.53688e-09	2.81564e-08	UP	131	131	131	16.043	16.0101	16.0555	1267.35	1403.08	992.709	1401.14	2048.51	1009.66	2223.06	1484.78	1965.59	2441.08	1001.16	2585.26	747.69	1062.87	566.904	389.958	815.369	239.235	407.701	50693.8	52272.6	33332.7	41004.9	19514.8	13967.3	15821.3	19396.6	12494.5	22014.3	22303	40834.4	39677.6	21408.4	14540.1	31249.7	39488.9	31218.2
M120T23	25.2767	4.65974	14.1608	6.24167e-12	7.61738e-11	UP	120	120	120	23.0878	22.7046	23.3273	42464	31379.2	43498.3	29561.9	29940.6	51036.1	45050.8	22036.2	14417.3	14752.8	16569.5	28855	15614.3	14609.4	21211.9	11644.1	24955.7	24383.2	32077.7	536704	832575	516224	763696	500618	762219	696535	395287	646876	805474	562370	494807	660578	889717	893838	512622	519611	329373
M117T16	22.7937	4.51056	9.25931	1.09186e-08	4.58201e-08	UP	117	117	117	16.0464	16.0101	16.066	1411.36	1977.38	2087.52	1770.74	1472.09	1193.21	2311.19	1006.62	2215.58	1876.24	1117.23	3377.41	381.073	1019.02	1242.12	989.601	917.975	752.13	912.385	53322.9	66444.5	43531.3	43706.7	19684	14155.2	15661.8	23137.3	15319.6	20246.8	17891.9	38560.1	40734.8	24238.3	13532.8	30130.7	37457.2	32763.2
M65T31	21.0695	4.39708	12.9216	3.25788e-11	2.397e-10	UP	65	65	65	30.9331	30.9177	30.937	3973.34	5101.45	2967.23	4698.49	4098.88	5529.13	4872.59	1779.27	2570.1	3440.48	2749.11	8287.96	2011.11	3580.39	3178.49	3307.09	4958.54	1846.12	2186.85	48031.5	59354	34043.1	38684.9	91284.1	84966.5	68304.8	93175.9	84380.6	109291	116440	103220	107078	117093	121069	57443.6	69636.9	58738.7
M137T31	21.067	4.39691	13.1749	2.38596e-11	2.02121e-10	UP	137	137	137	30.9368	30.6939	30.937	9988.42	10306.7	5130.31	7186.2	9159.63	5791.81	6476.89	6669.19	6556.43	9978.58	7440.96	14868.3	4776.56	11650.5	7214.56	8862.21	5436.92	5140.23	6178.27	98726.3	126597	71028.4	90789	182357	174565	138419	204567	171404	227599	244893	204913	223985	249911	251088	121266	146573	124851
M94T23	20.5954	4.36425	10.8274	7.56676e-10	3.63223e-09	UP	94	94	94	23.3326	23.3242	23.3358	2724.79	4471.84	2514.31	2684.08	4157.28	2565.16	1513.34	1709.78	2273.82	2378.67	2105.19	2663.9	978.623	2250.76	1515.19	1365.84	823.27	907.349	1153.96	26543.5	31794.3	29867.3	31858.6	86370.8	44827.7	29844.1	56275.4	32742	63884.1	49818.2	43507.7	77801.5	59306.1	61922.1	42863	40758	28780.2
M94T31	18.9768	4.24617	11.4786	2.60465e-11	2.12577e-10	UP	94	94	94	30.933	29.9724	30.9408	1452.8	1612.93	2178.5	1962.15	1214.92	1340.6	1689.28	1004.79	1734.71	1407.12	1247.57	28832.8	540.491	2735.74	1477.04	1504.88	1032.4	750.568	1779.5	27774.8	43947.8	22460	29357.8	63854.9	58276.8	46360.5	66382.7	59863.9	78688.4	84053.7	73129.1	77776.7	85371.3	85793.9	36103.8	45976.3	43204
M91T31	17.3481	4.1167	12.0708	1.15834e-10	6.9502e-10	UP	91	91	91	30.9369	30.9234	31.0197	9860.29	9553.37	15110.2	8343.68	13718.7	11914.1	14195.4	14025.7	7591.06	13087	8772.52	12806.1	7122.09	12546.3	14080.2	16949.6	8817.54	5748.19	9614.73	118517	146881	77669.8	92613.7	222336	216139	171013	229500	209459	275059	291750	258847	274263	299282	305228	148895	171475	141410
M122T23	16.6542	4.05782	13.6749	8.2645e-13	1.34481e-11	UP	122	122	122.1	23.0877	22.7124	23.0917	665.151	568.384	846.559	711.565	812.957	733.184	776.833	421.77	575.274	514.728	483.381	1801.71	512.459	566.361	675.31	479.146	341.884	7027.15	332.605	9224.1	21710.3	8657.85	19025.1	13523.4	16331.6	19694.1	9768.41	20204.8	18490	12652	14284.2	17085.7	21957.2	23582.2	11915.8	14049.9	11152.2
M133T34	16.3744	4.03337	6.29263	3.80277e-06	8.32295e-06	UP	133	133	133	33.9086	33.9048	33.9118	1970.7	1053.66	2108.76	1883.64	1399.19	1643.14	1705.68	1086.45	2188.59	1204.47	1482.4	1224.1	1826.33	1577.26	884.916	1601.85	622.784	1497.46	821.898	7580.69	14650.1	5165.64	12430.7	32674.8	15043.4	16048	30730.7	25555.4	36282.4	51345.9	40415	58579.5	48368.7	40429.8	9865.1	14657.2	14312.8
M147T31	14.6696	3.87475	10.9311	6.3899e-10	3.11931e-09	UP	147	147	147	30.9368	30.9329	31.015	2152.35	3815.08	1684.06	4529.61	3073.21	1884.93	3922.25	2718.52	2415.01	2621.49	3417.63	3791	2109.13	3740.17	3450.87	3905.43	1984.72	1641.02	1523.98	18925	29082.8	16261.9	20133.2	48920.5	43512.5	36340.2	52091.8	44874	60718.9	61930.8	53092.8	60307.8	65441.6	69758.1	34704.8	34129.1	32258.7
M93T23	14.3606	3.84405	13.1125	1.35176e-11	1.39571e-10	UP	93	93	93	23.0878	22.4818	23.5681	3684.23	6078.45	3434.47	3708.7	3460.62	1849.24	4828.28	3009.74	11614.6	14044	5267.12	12343.7	2040.64	8861.31	10825.6	3255.66	12251.1	2081.7	850.691	43004.6	84756.6	40406.9	98411.8	70064.5	98462.2	95121.2	55771	102806	104068	79749.4	71070.2	98197.1	113962	127555	61380.6	66347.4	50885
M63T23	14.0192	3.80934	12.1448	1.92912e-12	2.92235e-11	UP	63	63	63	23.0878	22.7091	23.0932	1840.65	3275.43	2596.84	2841.56	1392.03	2275.36	3514.83	2148.27	2192.58	17398	1945.98	41450.5	2107.79	2801.22	2289.19	1585.78	2551.46	2193.51	1593.99	52795.4	89611.3	30176.1	75989.2	51629.2	78271.7	74499.3	44364.2	91141.9	90303.9	61992.7	53883.7	73791	89821	101444	54467.3	47231.8	46454.5
M159T18	13.0102	3.70157	6.55958	1.9711e-06	4.5846e-06	UP	159.1	159	159.1	17.9057	17.5116	17.9326	43190.5	17423.5	31645.6	4772.73	41227.4	55973.1	38088.4	5271.59	37964.8	8433.77	1936.97	25190.1	24146.1	34409.8	48781.2	28946.6	924.848	657.947	750.282	558462	642023	377414	562551	182197	38220	150256	114002	93471.4	103659	141438	250128	417220	111377	40388	447396	560032	455485
M105T15	12.476	3.64109	7.03205	7.24954e-07	1.90911e-06	UP	105	105	105	15.1824	14.5982	15.1962	2339.9	2578.01	1813.06	2054.09	3013.16	1977.76	10192.1	853.154	3622.96	3156.15	2831.86	5730.94	2865.31	4080.94	4907.88	2795.7	1469	1663.44	1039.16	64993.3	76213.4	53365.6	70695.6	25874.7	5182.2	21749.4	12407.8	16319.5	14693.1	20658.3	43780.7	49958.9	22465.8	7613.73	72704.6	61664.5	62596.5
M115T19	12.2182	3.61097	25.1274	0	0	UP	115	114.9	115	18.589	18.5813	18.9757	4515.87	5689.76	3990.49	5497.28	3425.28	4082.23	2582.14	16758.6	14530.9	14942.6	23780.1	3076.76	1855.64	1810.03	3474.36	1809.2	2812.33	4419.04	3248.15	57364.1	69262.7	75387.7	78152.4	74976.2	86263.3	64018.5	100158	72758.3	93705.4	77946.5	77594.3	62600	101881	84973	69677.8	85996.5	86649.3
M105T31	11.7933	3.5599	10.9448	6.03311e-10	2.97157e-09	UP	105	105	105	30.9369	30.9234	30.9437	5777.71	5520.14	6492.83	7007.41	4940.6	5129.38	6397.52	4652.85	4664.11	8609.31	6251.18	9487.03	5119.59	7694.58	5816.3	8107.08	3464.75	3113.89	2726.07	32144.6	56088.8	25129.6	41307.6	81888.2	75355.7	59075.8	88641.3	70374.5	100038	104337	84843.8	98141.2	109811	110469	51518.9	64343.9	39229.4
M101T12	11.5625	3.53138	3.86704	0.000941455	0.00119393	UP	101	101	101	11.8491	11.8369	11.8641	56530.3	22538.9	68379.3	82576	17925.5	22856	17276.6	4357.94	16891.8	14473	1741.06	10998.2	13084.2	10917.6	11696.6	10903	20479.6	10673.1	18597.9	97176.3	129671	95279.9	353478	1.43328e+06	325466	295256	160620	374946	193341	320985	229027	163096	213277	309276	84630.6	116823	72708.6
M53T31	11.523	3.52644	12.6754	2.50959e-11	2.08128e-10	UP	53	53	53	30.9369	30.9177	31.0228	3493.52	4366.56	4469.09	4040.82	3863.88	3498.71	8510.95	2612.65	2373.15	3637.05	1989.24	11769.5	3688.16	4153.17	2394.12	5200.83	3228.04	1908.57	2206.73	29983.8	37011.5	22401.4	25139.5	56459.4	50584.5	39283.7	54636.7	46874.1	65959.6	68501.8	59656.5	62552	71075.3	67884.4	34613.2	43296.5	30435.1
M65T23	11.1586	3.48009	11.9796	1.10003e-10	6.64553e-10	UP	65	65	65	23.0878	22.7091	23.3319	14654.3	16044	14779.4	12221.1	11824.1	15590.2	9286.46	8039.52	7828.92	6287.6	8412.82	23242.8	7904.55	11596.4	8071.06	9166.74	11446	9386.82	9647.76	51780.1	161263	57669.5	126577	84796.7	137525	120982	81752.2	164165	145228	101563	112829	126823	160125	168605	102395	103075	83811.7
M90T25	11.055	-3.46663	-2.13299	0.046919	0.0349898	DOWN	90.1	90	90.1	25.0491	25.039	25.3318	12166.9	11522.3	18199.1	17308.9	1490.94	1250.14	15918.6	552.329	680.198	362.904	674.507	139626	29844	16069.6	7732.67	15856.1	4209.86	6821.7	15680	2698.83	2797.64	1209.39	1047.5	595.8	1065.18	671.852	160.705	493.644	699.622	1513.55	3663.27	3334.92	922.537	566.706	1589.36	2806.73	1831.46
M138T23	10.9046	3.44687	7.68175	1.26016e-07	4.33875e-07	UP	138.1	138.1	138.1	22.8146	22.8133	22.8184	1977.99	11457.1	2146.75	2256.39	1535.99	1571.88	1170.38	2893.96	1648.83	1988.49	896.633	2975.67	1194.11	952.538	1070.66	821.944	1218.38	612.801	1138.96	10324.4	12456	8965.19	9382	25103.4	36971.6	13275.3	31691.3	31647.2	35438.5	38766.6	35948.9	31761.4	35251.1	40864.1	9341.71	9969.04	9839.86
M133T19	10.6862	3.41768	23.245	0	0	UP	133	133	133	18.5853	18.5813	18.5892	3332.83	5003.29	4980.22	2199.38	3211.78	3342.21	1958.32	9992.99	9934.58	10938	14175.3	4409.06	2857.45	2409.45	2384.99	2210.52	2306.27	2624.54	2696.55	31173.7	47546.2	50489.6	50213.8	49554.3	58012.7	39740.3	70633.2	47063.8	56565.1	48135	50170.8	46069.3	64878.6	55962.4	42539.5	51859.8	52467.9
M79T31	10.5097	3.39365	11.6392	1.8982e-10	1.04901e-09	UP	79	79	79	30.9369	30.9177	31.019	5177.32	8780.68	6327.94	5848.3	6077.03	4199.46	7687.71	4723.76	4113.24	6516.57	3615.06	10909.3	4675.35	4383.7	4009.28	6165.34	4500.3	4903.54	4849.19	36608.1	45376.1	23991.7	35301.5	69228.3	64687.4	51915	62710.7	60915.9	77916.4	90395	79673	87415.2	92227.8	95221.3	50655.6	50311	47250.3
M115T16	10.4138	3.38042	7.73386	6.17304e-08	2.3272e-07	UP	115	115	115	16.047	16.0273	16.3359	1932.92	1405.94	16381.9	1702.54	2029.08	1342.38	1410.06	1004.61	1954.34	1849.46	1336.65	2260.83	1183.87	1259.61	539.48	1180.61	1225.29	739.499	1382.2	37672.7	41784.4	28999.3	28576	38126.9	7438.9	7435.35	11041.2	9000.62	14572.8	13003.3	25215.9	23672.3	17903.4	6685.85	19123.2	23783.5	22013
M166T24	10.0089	3.32321	4.42056	0.000259467	0.000373307	UP	166	166	166	23.8488	23.8437	23.8573	4627.22	4537.47	3045.72	3921.13	1958.67	3309.85	7506.05	5497.51	6133.96	5620.85	3888.99	12807.7	5040.09	2868.04	3389.64	4761.14	3561.16	2618.44	2780.4	5261.1	24276.3	6020.6	33682.1	46933.1	178820	23377.2	75458.7	136998	39020.4	30942.2	25284.9	26677.6	37425.9	71340.9	13779.6	14429.2	11724.3
M79T23	9.76471	3.28758	13.6262	8.47322e-12	9.79414e-11	UP	79	79	79	23.3309	23.3242	23.336	11048.1	13514.2	10864.6	9228.41	8870.53	9073.77	8087.04	10014.8	11153.5	12307.5	12156	6343.93	5363.26	6638.14	4424.47	6768.67	6576.72	3011.95	3922.83	56597.7	58255.6	58310.9	59118.2	130665	92707.4	59712.8	98768.3	65080.4	112587	110303	84367.1	119802	100929	102437	82269.9	82895.2	56219.2
M129T16	9.60675	3.26405	8.52602	4.12693e-08	1.60431e-07	UP	129	129	129	16.0374	15.9919	16.058	1691.66	2274.19	3091.8	2251.49	2485.01	1882.81	3565.05	1913.43	2790.7	2764.58	1914.16	2852.45	2275.97	3036.48	3529.84	2887.05	2030.95	1928.9	2653.59	43634.1	49671.8	32670.5	28809	14490.8	11529.9	7546.5	15801.1	11985	13200.7	15817.5	25688.9	28547.3	15788.9	12335.4	26102.9	27367	23446.9
M128T21	9.42227	3.23607	6.50223	2.37969e-07	7.70739e-07	UP	128	128	128	20.6492	20.6397	20.8498	1157.64	1324.95	647.093	1314.81	1633.77	897.573	1125.56	1019.9	1873.22	1686.31	841.378	1808.91	519.224	648.561	563.256	620.964	40742.7	395.97	453.594	52896.5	57230.3	26971.3	44645.6	17274.9	10378.8	11762.8	14717.3	10027	18443.7	17593.6	30404.8	27338.9	18954.7	9742.59	29788.8	37418.7	35346.1
M76T30	8.75559	3.1302	3.72787	0.00124033	0.00153265	UP	76	76	76	30.2887	30.2807	30.3004	523.219	1079.14	4795.83	5237.47	1776.92	1449.74	191.958	3592.49	2346.8	2018.06	14783	1434.53	404.37	736.94	609.957	697.169	764.472	720.885	948.687	3674.01	6163.45	1309.83	1891.95	59974.7	71790.4	2921.61	24550	7802.37	26093.1	12037.6	11098.5	8583.89	15368.4	72287.4	9096.21	7080.18	11653.3
M91T15	8.24248	3.04308	8.82901	2.20888e-08	8.8732e-08	UP	91	91	91	15.1868	15.0347	15.2227	5511.16	6671.11	4454.99	4405.81	7666.28	6672.73	6297.56	3088.92	5141.28	5788.36	7693.47	8946.39	5880.73	5348.75	7031.48	6499.28	3664.89	2796.66	4363.69	66516.3	78575.6	63641.5	75351	34421	10398.2	32067.8	25168.7	18107.3	20178.1	24495.1	55255	61518.4	35774.6	33183.6	74540.7	71712.7	63562.7
M148T30	7.53543	2.91369	3.85871	0.000882133	0.00112521	UP	148	148	148	30.2887	30.2731	30.2965	1852.06	3249.38	21498.2	22594	6582.26	10244.1	1938.27	14337.5	9699.21	10417.6	57903.3	7276.51	1623.89	1545.49	1725.11	1230.96	3574.17	2073.56	4121.93	14629.6	23921.4	6563.81	14569.4	204166	251423	11800.8	86310.2	31411.5	93481	44117.4	41355	23745.6	64631.7	240319	35688.8	34645.5	37796.4
M119T11	7.43047	2.89345	1.89353	0.0728121	0.0500417	UP	119	119	119	10.6149	10.5584	10.6377	28544.4	24135.6	24519.8	38056.4	26763.1	16156.1	10295	14488.9	40585.8	42458.2	39928.9	20652.6	9639.75	18753.7	17021.1	16219.4	10814.3	9587.8	11739.7	12508.2	9459.64	13064.3	14543.1	30961.3	325914	13152.3	1.46243e+06	264791	24053.5	28127.5	25350.9	17730.7	9921.34	701086	17569.6	31112.1	19465
M104T30	7.41065	2.8896	3.79868	0.00103929	0.00130553	UP	104	104	104	30.2887	30.277	30.3042	2215.95	4796.52	19453.8	28196.6	7366.31	9223.2	1603.52	14121.4	8111.35	11351.3	48946.7	7028.59	1863.04	2782.95	1703.88	1827.14	3160.43	2926.47	4887.37	17343.7	26697.5	4891.22	16441.5	204461	248954	10374.1	85161.2	31835.8	94760.4	39031.6	42815.9	31306.7	60164.3	238442	32993.5	32417.9	35356.1
M92T24	7.2944	2.86679	4.38181	0.00023782	0.00034528	UP	92	92	92.1	23.8479	23.8318	24.0523	6120.35	5917.24	4063.86	4545.88	2774.66	3363.34	7421.95	3848.35	8609.9	8953.57	4985.09	47702.9	4572.15	5987.47	4212.15	5495.88	3077.5	3536.19	3384.18	38724.7	27803.5	9216.99	35440.8	48646.9	198704	29835.5	82148.9	152397	44108.5	33708.2	28752.2	29223.7	38281.3	82713.9	15334.9	16880.8	12843.1
M132T30	7.15046	2.83804	3.78757	0.00104005	0.0013064	UP	132	132	132	30.2848	30.266	30.2926	1589.07	2961.35	17786.2	21550.7	5290.73	8180.18	774.851	10849.6	8586.63	10293.8	49521.3	5860.17	1899.74	2271.86	1686.16	2078.24	2209.34	2292.33	3513.23	10706.9	15905.3	6466.15	14190.9	170652	209132	10207.7	70894	27479.4	72289.5	40342.7	38157.5	21013.8	54692.1	200746	28202.2	30369.3	31126.2
M51T30	7.12483	2.83286	3.56126	0.00180438	0.00215838	UP	51	50.9	51	30.2887	29.6716	30.2965	1973.08	3262.38	14653.3	18867.7	5530.84	8424.88	1218.99	10999.6	9220.64	5803.59	47441.5	6259.89	961.39	2981.39	1362.42	1962.86	1601.92	1937.72	3978.55	13249.2	22254.3	4216.01	9230.85	164506	204741	8794.47	67607.2	20306.8	77212	37196	38549.1	24798.8	2183.74	195884	27890	26439	33332.2
M147T30	7.07899	2.82354	3.93214	0.00072524	0.000942636	UP	147	147	147	30.2887	30.2731	30.3005	3041.96	4201.21	26101.4	28837.2	6888.85	13099.8	2223.35	15618.2	9940.3	13501	70027.6	7283.18	2198.03	2287.55	3033.14	2949.16	4079.85	2818.09	5377.92	19533.4	26780	7855.89	20690	234381	277021	11731	97148.5	39793.9	104756	52424.2	40249.1	34730.1	73914.4	268623	42322.1	42401.9	46365.6
M121T31	6.94621	2.79623	12.1011	4.07043e-11	2.70959e-10	UP	121	121	121	30.9407	30.9292	31.0142	15328.1	43026.6	21284.5	24281.8	18503.7	34148.5	19447.5	11517.7	16160.5	20486.2	13124.5	35992	11550.3	26306.3	18324.9	14254.8	20187.8	11408.4	14090.2	91197.7	111832	65927.7	70345.2	163425	152937	119250	172428	149154	189761	195888	182785	197546	210130	215236	114057	133106	115027
M67T23	6.82271	2.77034	8.04608	7.18438e-08	2.66861e-07	UP	67	67	67	22.8134	22.4786	22.8203	22172.6	55723.3	23803.6	23568.3	16275.5	14600.1	15056.6	27010.3	46366.3	25658.8	29368.9	22237.5	14765	16970	16048.6	13458.2	16227.7	8792.2	13610.2	68132.7	95286.2	58542.8	76167.1	198706	212588	106197	187180	202271	260556	238748	207116	182533	256478	266176	75383.7	98253.9	85268.8
M176T30	6.67903	2.73964	3.66989	0.00137926	0.00168916	UP	176	176	176	30.2906	30.2767	30.3004	5116.66	10126.4	52306.6	50282.8	17346.9	26568.8	2743.83	36078.7	26832.4	26039.6	131715	13751.5	4777.32	6720.25	5896.05	4651.4	7009.63	5777	7678.53	35510.5	37716.6	11917.9	39532.1	445558	554200	22971.7	188027	66963.6	205902	100544	97682.6	69836.1	135812	536321	84196.9	70686.2	80114.8
M103T30	6.47491	2.69486	3.97284	0.000655573	0.000863366	UP	103	103	103	30.2887	30.2729	30.3047	10404.9	19049.2	85757.3	93315.5	30942.7	46203.7	7329.04	58389	38164.9	43651.2	215852	27623.9	5017.83	10297.7	9826.05	7797.74	17764.4	14869.4	21433.3	67744.5	96684.4	31634.3	67320.8	705152	863844	48885.3	300080	113183	322457	168434	159398	114023	228856	826473	132637	126448	137704
M131T30	6.4404	2.68715	3.99742	0.000619972	0.000822042	UP	131	131	131	30.2887	29.6719	30.3042	22512.7	42141.9	184296	213090	77894.6	100276	11145.1	132352	97479.6	105588	478173	69267	17462.6	22016	24073.4	18772.1	41128.5	32207	46407.3	160024	215547	75182.4	156081	1.58437e+06	1.95243e+06	113354	673775	268580	732202	379510	353389	266705	516330	1.85636e+06	295245	288975	317751
M77T30	6.41122	2.6806	4.02367	0.000589745	0.000786512	UP	77	77	77	30.2887	29.9765	30.3008	8577.77	11977.3	55846.9	55188.6	19492.8	27672.2	5300.67	34041.3	24766.5	27419.6	125450	23725.6	5299.54	9254.37	6712.97	6811.73	12598.4	11199.2	11596	44882.2	60073.6	18132.9	40167.6	440199	536872	29717.2	188955	75239.2	203560	106263	104585	73956.6	141135	510512	84794.9	81483.9	90608.6
M102T30	6.3334	2.66298	3.85298	0.000870993	0.00111221	UP	102	102	102	30.2868	30.2731	30.3004	3838.97	6005.71	27595.9	27187.3	5945.03	9285.97	3106.45	11417.9	10080.9	10904	58679.5	11163.5	1496.28	2960.82	2624.63	1890.91	4144.26	4228.41	3647.76	18581.1	24599.1	8337.41	14039.3	188431	232590	9840.72	77250.8	31948.3	88289	42242.3	38622.3	32177.2	56652	223350	36350.8	35583.4	35938.9
M54T23	6.07299	2.60241	7.17335	5.57781e-07	1.56959e-06	UP	54	54	54	23.4626	23.4585	23.4666	2209.65	3404.36	3547.26	3140.58	3773.36	2799.39	3757.88	3249.28	2225.29	2411.01	5338.09	3441.99	2683.75	3157.43	2925.75	3193.34	2234.51	2129.57	2693.78	6692.35	9587.17	3420.03	4464.11	24231.3	25716.5	7785.94	13647	29532.8	24571.5	33875.1	15914.9	24500.8	29060.5	40807.6	17695.6	15604.9	12847.2
M111T23	6.03993	2.59453	13.4637	3.81095e-12	5.212e-11	UP	111	111	111	23.2714	23.2669	23.2843	8357.98	10837.5	8742.65	7716.98	8876.05	8424.31	11143.4	7381.77	18181	15132.8	10820.9	20880.8	7874.19	10482.7	8854.74	8316.76	7224.66	8063.62	7627.13	39442.4	51463.9	43192.7	39260.4	54310.4	71706.2	61169	84121.7	70961.9	83766.2	74510.8	80186.9	81780.9	78962.3	92667.8	49135.3	44307	45959.8
M107T31	5.96322	2.57609	6.97272	7.57905e-07	1.97095e-06	UP	107	107	107	30.9369	30.929	31.0697	4995.76	5312.38	4951.19	5850.27	4702.22	7882.32	4764.6	8108.92	3213.23	5161.22	8379.38	6713.97	2352.62	9351.47	4028.52	10236.5	8722.29	3046.32	3445.59	15052.1	29028.9	12724.5	17584.2	104228	31890.4	27703.4	41263.9	33273.6	43314.7	45022	36566.6	40425.9	50805.9	45900.3	28214.6	23753	25917
M81T23	5.93475	2.56919	7.54926	2.1016e-07	6.89725e-07	UP	81	81	81	22.8182	22.4747	22.8262	19413.2	56686.5	20208.5	30708.2	19251.4	20864.4	27464.6	25079	31698.7	21872	28374.6	27646.4	15313.7	18224.2	15252.3	18061.2	16110	14290.6	12471	47833.4	92831.7	54609.8	62002.6	167904	168827	94682.1	159400	192168	247838	222822	203769	172134	226179	256095	87505.3	82346.3	98220.6
M93T8	5.63019	2.49318	2.30616	0.0319047	0.0254157	UP	93	93	93	7.78911	7.33358	8.14708	12603.5	16067.9	9698.41	25202.3	11397.9	13216.1	12378.8	5650.49	10456.2	10403.1	17570.6	18586	12165.9	11871.5	10722.8	9890.13	11100.3	12586.5	10853.7	10375.2	12007.2	24861.7	11786.6	27663.5	262592	11493.8	359554	82994.4	25529.2	30123.3	25289.3	22174.1	16786.9	396162	11438.8	12067	9617.23
M177T17	5.51357	2.46299	5.82464	3.25312e-06	7.24779e-06	UP	177.1	177.1	177.1	17.2939	17.2374	17.3102	41728.7	50911.4	12236	16875.8	18200.9	8102.46	29184.4	9313.71	12264.6	9001.47	18603.5	197274	24590	39348	54797.6	35330.5	5974.92	6774.04	12707.4	251062	242902	261133	314093	87367.9	13953.7	182322	82777.4	60519.1	71207.9	75079.3	230998	270710	86974.6	24811.4	347739	302702	278678
M54T22	5.49705	2.45866	15.5727	9.32587e-15	1.95109e-13	UP	54	54	54	21.6495	21.6406	21.6624	6467.54	5925.66	14788.6	11633	4616.35	4901.48	7748.96	7576.09	9086.07	9039.76	7219.57	6565.79	2860.83	4547.49	3334.82	3879.87	5431.78	3522.62	4392.8	31368.9	36190	25481.8	29400.5	66559.8	38665.1	34480.6	40028.7	33290.8	39060.8	31947.4	37357.3	36774.6	39511.8	34959.9	32041.8	29422.8	31810.3
M56T25_2	5.46804	-2.45102	-1.69251	0.107709	0.0680833	DOWN	56	56	56	25.0441	25.0329	25.3318	46849.7	72422.1	55088.5	83210.8	70040.7	56542.8	211342	31416.1	30359.8	22045.9	30981.8	3.02401e+06	605795	401269	272381	426118	170024	202250	287148	69112.4	72267.1	27658.4	31557.6	37000.5	59586.9	42370.3	32893.8	25677.7	66650.3	51770.5	140512	151403	49834.6	45158.3	76520.5	84744.7	27923.5
M55T31	5.35283	2.4203	11.1235	5.76494e-12	7.18733e-11	UP	55	55	55	30.9347	30.6788	31.0112	30009.3	20499.1	25850.4	22046.2	21162	29006.7	47745.2	12658.4	18833.5	24343.3	11654.5	105449	18293.6	22307.5	24418.6	30422.2	19803.1	15820.6	18472.3	95495.4	116425	63211.1	82736.8	168174	151339	119047	173731	139885	180806	202288	173731	187063	195137	211667	113017	123715	113110
M53T23	5.34374	2.41785	8.27343	2.2406e-08	8.98996e-08	UP	53	53	53	22.8236	22.7169	23.0917	4874.84	15646.9	4805.63	8136.82	5632.85	3084.6	6551.19	7363.03	7341.16	6954.83	8811.13	21436.4	5430.41	4636.97	11637.5	5871.21	4128.87	2899.14	3819.76	16551.4	33393.6	14008	16834	35291.1	48193.1	33508.4	44847.7	46024.5	59474	64907.5	50144.8	63116.2	51443.1	62807	23882.9	26595.6	16875.4
M89T25	5.30765	-2.40807	-1.75476	0.0962358	0.0623056	DOWN	89	89	89	25.0457	24.5608	25.3318	66349.7	101645	57910.1	77101.7	66735.2	61764.9	384458	22557.1	39039.5	24894.2	31524.6	3.18582e+06	699546	408552	283962	436106	188755	213007	358894	88721.3	97906.9	84654.1	32414.8	36214.1	44803.7	36935.6	28566.7	25307.1	55447.1	57782.6	140720	150441	50199.6	50668.4	62678.1	96388.5	93246.7
M71T23	5.1147	2.35465	8.02227	6.75221e-08	2.52396e-07	UP	71	71	71	22.8145	22.8093	22.8184	11049.9	36106	12576.8	16745.3	14683.2	11559.9	13395.2	12744.9	15767.5	17706.9	19833.7	26144.1	12902.3	12850.3	12695.1	14669.6	10052.8	7898.95	11669.2	37717.8	52568.7	30568.9	38874.1	84610.4	109072	54203.6	92961.1	102516	128340	134597	111667	97290.2	117658	135433	56394.6	49819.8	45321.8
M93T17	4.8666	2.28292	6.40478	7.26961e-07	1.91292e-06	UP	93	93	93	17.2639	17.1193	17.5112	67709.2	78782.6	29144.8	42953	52342	35923.4	37819.1	12567	28093.4	31622.7	48300.3	292507	46663.6	76316.9	88872	81767.5	19153.7	17697	28692.5	337060	325950	197487	648114	163366	55050.6	464236	165740	126570	200036	152465	364989	313366	177655	208004	519065	468011	414453
M87T12	4.85505	2.27949	5.90931	4.67407e-06	1.00155e-05	UP	87	87	87	12.0515	11.0745	12.0963	2416.24	5282.44	2687.19	3342.5	1279.64	2672.16	3594.84	2045.59	2472.3	7525.18	1892.94	3655	2475.14	1209.76	2055.91	13553.1	3428.23	1829.26	3490.19	7930.89	6588.32	6532.39	11908.8	24245.6	34595.1	17821.9	5903.32	34866	24074.7	36725.4	17643.9	10991.8	22180.5	8033.8	7749.24	11614.7	6794.02
M69T23_2	4.80433	2.26434	9.4276	5.83353e-09	2.52884e-08	UP	69	69	69	23.2714	23.2518	23.5681	31686	51172.1	36749.4	52569	37183.3	41494.6	40979	44140.7	69450.4	47936.6	33956.7	50755.5	28865	36123.2	53430.1	47533.2	39543.6	37901.3	23777.2	84396.3	155129	89252.8	116504	146715	248194	203268	241679	287757	304882	288652	300967	292754	289284	305140	170134	149471	182773
M192T17	4.75395	2.24913	6.3845	6.26484e-07	1.7146e-06	UP	192.1	192.1	192.1	17.2889	17.225	17.3199	82924.6	98155.7	27009.8	45715.4	64723.4	35406.5	50459.8	16255.1	30442.7	32137.6	46405.3	348438	50537.5	91172.5	110257	88873.3	15418.7	17721	37571.5	416476	401625	432703	524699	203171	53926.9	328701	205502	149085	156229	187915	430207	495931	181461	90144.6	609344	575696	506305
M135T23_2	4.63109	2.21135	11.6347	1.60363e-11	1.57199e-10	UP	135	135	135	23.1541	23.1486	23.1581	3348.23	9338.12	3412.11	4943.29	6455.35	5792.22	6663.65	3233.19	7015.91	5703.83	4098.46	14287.1	4324.24	6162.91	7366.53	4217.85	5355.33	4290.85	4302.41	27454.7	32059.8	26335.7	26658.9	23303.1	11538.5	24721.2	27008.3	21712.8	21466.9	25147	40031.1	52151.7	26198.8	22301.4	23386.5	32330.6	24712.3
M89T9	4.62824	2.21046	10.5233	3.47469e-11	2.48226e-10	UP	89	89	89	8.84873	8.7191	8.8913	4176	506.044	1908.37	2553.68	2976.22	6548.69	6810.28	3464.19	8015.24	8470.71	1463.68	671.103	3147.91	1734.23	3591.69	3384.75	5796.28	4242.25	2554.98	26776.4	24057.7	21390.5	13188.9	4701.7	16957.7	16995.6	12663	17592.1	13523.4	21937	17000.9	19838.1	14967.2	23050.4	10841.9	14916.7	10980.5
M98T20	4.37853	2.13045	12.444	2.47846e-12	3.62968e-11	UP	98.1	98	98.1	20.4119	19.9692	20.4516	28460.1	40728.7	52242.4	24880.1	17713.9	25926.7	60004.1	18951.6	27853.4	32324.8	22891.8	44276.6	33586	52762.2	15675.4	36941.2	70194.9	33835.3	46133	164058	186866	163675	126286	199856	149243	148590	175202	125901	177561	157558	7566.33	155461	184299	147234	152950	148357	141403
M70T19	4.33405	-2.11572	-7.07095	9.90255e-07	2.47938e-06	DOWN	70	70	70	18.7403	18.7326	18.7502	122609	137397	173142	184127	94513.1	89124.8	75015.1	125806	112183	78699.6	100806	51086.5	38278.6	43497.1	52842	37734.7	92197.1	67815.5	62806.1	19677.2	19051.2	14616.9	14042.5	39163.4	10609.6	11535.6	14460.1	10198.1	35762	22205.2	20951.4	26142.8	21549.2	27808.8	19239.7	20712	20204.3
M70T23	4.16058	2.05679	13.9527	3.73035e-14	6.82881e-13	UP	70.1	70.1	70.1	23.2723	23.2673	23.2843	3652.48	4409.02	2060.44	3211.59	3353.8	3672.63	7502.72	3259.87	7955.32	5441.47	3959.01	7449.89	2059.7	2925.49	4543.07	3841.12	3826.02	3459.23	2754.84	12547.4	16299.3	11840.4	12747.9	16103.6	20380.1	16184	18803.2	20790.9	24406.6	20961.4	21026.5	19906.4	19413.9	21056	9600.91	13780.9	13674.2
M68T20	4.16021	2.05666	17.4581	0	0	UP	68	68	68	20.4092	19.956	20.4206	35754.8	38326.9	27656	48783.1	38858.4	30133.9	31375.6	26229.4	35271.1	12405.7	39912.8	48957.7	13033.7	59186.7	52213.3	26456.4	38054.6	28108.2	33339.4	88450.6	126552	119972	128508	202226	146700	118799	160146	127730	167405	151373	160826	158323	191050	145818	165277	156842	146313
M182T24	4.15979	2.05651	6.61002	3.22374e-07	1.0041e-06	UP	182.1	182.1	182.1	24.3008	24.2961	24.5131	10835.6	17368.9	4745.58	7473.47	9878.85	5361.35	4812.14	3807.09	5972.87	7044.31	7085.32	38806	5958.65	11674.4	9175.2	10855.7	3170.66	2385.99	3848.86	46792.2	52862.3	45739.7	46619	25352.5	7011.95	20018.3	24562.4	14802.9	27400.3	23984.2	60150.3	56146.4	24391.1	7300.32	59353.7	60622.2	58592.5
M58T12	4.08314	2.02968	7.89762	9.80568e-08	3.50844e-07	UP	58	58	58.1	12.491	12.4779	12.8682	14289.1	13860.5	14240.3	15859.1	15090.5	15671.4	25889.4	18330.1	7765.98	6870.08	17025.8	17788.3	19963.6	19223.3	16493.5	21537.7	15524.2	14373.1	23190.2	84505.6	77590.7	83017.5	5608.35	33949.3	16268.1	43761.2	45440.9	17778.6	85865.2	67070.5	72391.2	71561.1	74952.8	75274	84851.2	76959.4	95655.1
M135T17	3.9156	1.96923	6.17234	1.01684e-06	2.53762e-06	UP	135	134.9	135	17.2899	16.8263	17.3057	35429.6	44468.7	14352.7	22961.6	27800.7	14518.2	28891.3	18789.8	14289.6	15312.9	27278.6	133565	24817.8	34110.1	42714.3	35605.9	8062.43	9913.51	19671.4	139985	143627	147875	188586	76185.3	17512.5	120063	86713.8	56744.8	65959.2	70650.2	159263	185463	74067.9	28863.8	219606	211231	181976
M56T20	3.91549	1.96919	24.3321	0	0	UP	56	56	56	20.409	19.9582	20.9752	102009	131259	176641	183672	162728	155290	94166.5	98961.6	161258	145889	150616	193456	132885	220362	174789	179387	136355	118982	104904	519625	493575	515240	490474	646807	603250	513901	638363	513351	645401	607510	655190	631300	742289	563840	640240	612779	597547
M71T19	3.82917	1.93703	6.87231	6.8298e-07	1.82802e-06	UP	71	71	71	19.2989	19.2856	19.3076	90593.9	87537.1	45115.4	55351.4	59753.9	48303.9	28649.4	44539.5	36472	57379.7	70582.8	61921.9	38647.9	45166.4	44433.1	60556.2	22309.8	25879.1	27735.9	342824	378416	311974	201021	69188.5	45712.6	174872	114185	60803.4	149511	124649	276897	322620	154510	143192	196213	229422	178840
M119T31	3.82494	1.93544	10.5166	3.76184e-10	1.96515e-09	UP	119	119	119	30.9369	30.9292	31.0054	4177.34	4806.34	5171.26	6348.51	6668.51	3800.56	6178.6	4560.17	4557.13	5765.06	3728.78	8387.96	4006.31	7603.31	4734.16	7584.23	3756.96	4144.79	3576.92	9216.84	18631.2	8076.59	14561.7	26751.2	22817	16750.1	22954.4	23756.4	24553.8	24916.9	22521.2	27737.4	29877.2	28105.7	16232	22241.3	13771.2
M126T14	3.73769	1.90215	4.09941	0.000493319	0.000670353	UP	125.9	125.9	125.9	13.5437	13.52	13.5595	5985.58	5657.92	5967.14	6277.65	4584.13	14553.3	2237.9	10420.6	7645.93	11889.6	1033.76	5377.72	3783.57	4334.78	2974.14	8955.62	4530.53	7324.55	3628.16	5594.57	8239.6	8663.65	19600.3	61149.3	70825.4	13365.8	15289.9	40384.8	22982.1	34323	14799.8	4653.67	38238.1	43058.8	5100.06	20026.8	7445.19
M82T20	3.67004	1.87579	12.0002	3.2796e-11	2.4051e-10	UP	82	82	82	20.4089	19.956	20.4169	19436.5	20012.7	22573.4	23398.5	14660.7	15395.2	19883	13163.8	23814.5	20421.5	22240.6	21270	14779.9	25177.3	22926.4	20606.7	9493.18	18158	13382.5	53683.1	49582.5	43987.7	63516.8	103266	58759.1	74661.4	56650.3	69429.9	88392.8	79637	27194	78351.3	108265	72828.9	81665.5	77288.3	78776.9
M41T23_2	3.64958	1.86773	14.7594	8.37108e-14	1.44228e-12	UP	41	41	41	23.2752	23.264	23.5759	28245	46033.9	36263.1	43520.3	29954.4	25938.1	36555.9	29713.3	46726.5	40380.8	30293.6	42038	26485.6	56385.2	29511.4	28359	52173.2	33366.8	25035.1	98260.3	124819	98943.5	85712.9	126836	145429	117705	160271	150204	180658	158974	162112	156015	154776	174006	105175	100669	105453
M71T20_2	3.62422	1.85767	22.293	0	0	UP	71.1	71.1	71.1	20.411	20.3972	20.4169	17007.9	24618.8	30202	28841.4	19247.7	22354.2	36150.3	14495.1	24515.5	19399	22123.2	30849	22800.7	28920	19648.5	27037	25826.8	17410.4	27902.1	82734.4	95730.8	82981.3	79191.8	96209	78370.9	76251.7	94971.5	77316.4	89702.9	92138.7	98338.3	84826.9	96653.3	68066.7	70630.8	80935.4	81670.5
M54T20	3.5495	1.82761	18.4142	2.22045e-16	5.41969e-15	UP	54	54	54	20.4054	19.9676	20.4169	10677.1	9166.11	14614.6	17009	10823.6	13068.3	16467.4	10052.6	13848.6	9315.8	10514.1	14154.9	10249.8	17119.9	16927.4	14590.3	13787.4	9630.4	12584	30975.9	36730.3	35989.1	37072.1	62992.2	45871.2	39044.2	47200.4	37713.9	51747.3	49427.8	51209	47955.5	58424.8	43179.7	49358.1	49320.3	46632.5
M69T20	3.51942	1.81534	9.30503	2.02166e-09	9.25219e-09	UP	69	69	69	20.4089	19.956	20.413	68536.3	68353.5	117294	116192	111763	101244	47426.8	66645	120165	95029	102886	88556.2	89087.2	138852	146358	134904	187249	86925.8	40246.1	136316	225732	203500	316174	505317	410845	299122	392038	313132	485432	419742	484992	462610	551152	379586	424043	396536	442025
M129T21	3.51167	1.81216	3.02668	0.00469836	0.00489441	UP	129	129	129	20.6522	20.6395	21.2682	1510.33	2436.27	2269.86	2117.84	23857.1	1374.89	2241.25	851.657	1736.12	17429.9	791.048	19113.8	717.422	1148.07	872.572	762.423	165837	417.313	590.228	76190.9	66921.3	51387.6	47162.5	24811.7	14651.6	16465.1	24569.2	20015.3	26307.2	144990	34263.1	45104.9	26740.5	16922.2	45099.9	50559.4	42815.3
M42T20	3.43303	1.77948	26.3505	0	0	UP	42	42	42	20.4089	19.9675	20.421	42752.5	41106.9	60209.8	64708.6	55242.2	52029.5	40230.8	31348.3	51696.5	53435.2	46739.8	57534.2	52054	62639.3	62635.2	58719.4	46963	47355.1	53290.9	147059	176277	158279	153010	200650	177006	156613	190757	148227	191878	180239	192293	189606	224290	165904	186889	187589	174603
M64T26	3.39825	1.76479	6.28255	5.79175e-07	1.61561e-06	UP	64	64	64	25.9189	25.9111	26.5083	4549.53	3934.2	7280.84	14725	3584.9	3550.99	2351.87	3447.88	3411.64	2548.66	4457.24	2840.16	1511.64	3093.54	2540.48	2614.38	1768.15	984.388	2154.69	9212.32	12905.7	11499	4066.2	29159	4731.43	8618.65	12715.2	9688.58	15801	16082.4	12327.6	19189.1	13289.4	23165.1	9815.83	13665.4	7689.59
M119T17	3.36233	1.74946	5.68426	4.55955e-06	9.79668e-06	UP	119	118.9	119	17.3062	16.8241	17.3185	29638.8	33594.2	16318	18759.8	27626.6	13705.4	12531.6	7864.11	12393.7	17444	8030.21	75735.7	15756.3	26052.5	33029.5	20494.9	9080.19	8505	15380.2	79386.9	73711	86306.8	113924	50266.4	20756.8	72421.5	55474	40581.7	43375.8	51390.2	95821.7	111943	48076.5	29997.3	143923	134452	107159
M148T23	3.3467	1.74274	5.27794	2.31581e-05	4.38568e-05	UP	148	148	148	23.1433	22.956	23.3338	38683.1	44035.6	35001.5	42991.2	46126.2	59406.6	10338.4	26668.7	10983.8	15889.8	11267.3	33479	13057.5	13683.6	22625.7	16940	23209	24486.6	26947.8	169139	181838	234033	107528	22130.6	50033.2	88095.6	40612.6	100175	46657.6	37376	59177.5	67757.9	51919.3	49178.8	85059	84231.8	105862
M55T20_1	3.34173	1.7406	27.4079	0	0	UP	55	55	55	20.4127	20.3961	20.417	133290	158535	195940	204473	176085	169074	184507	110372	169039	155698	160130	207315	158297	209311	206511	175710	163088	131150	146888	467533	572108	488799	477704	655395	548061	490027	586002	490902	602852	571603	606629	587098	688008	527643	597528	578771	546129
M104T26	3.32025	1.73129	5.93006	1.83507e-06	4.30392e-06	UP	104	104	104	25.9151	25.4167	25.9228	9177.44	9479.15	18356.9	32007.4	7757.52	6678.59	3256.19	9033	10060.7	7298.38	11602.4	8640.7	2599.14	7429.07	5467.56	5898.06	4242.28	3503.92	3641.04	19368.1	31148.9	24231.8	8679.56	69785.7	6492.45	17714.9	29984.4	25698.9	32689	39901.8	28795.5	41659.3	35228.6	50178.1	24331.3	27171.8	23826.1
M50T26	3.27875	1.71314	6.14585	7.89991e-07	2.02971e-06	UP	50	50	50	25.9189	25.9111	25.9308	9737.06	10609.5	21771.5	33809.2	7151.26	7101.59	5082.13	7014.24	7656.79	9628.17	13675.7	11965.8	2336.2	5198.72	4591.11	6302.13	6758.61	3373.8	3811.28	21696.1	31995.3	22630.3	8569.54	74687.3	16555.2	21477	30232.4	23539.1	35525.1	37548.4	25916.7	47314.7	29327.5	48141.4	24537.1	27367.7	22306.7
M137T23	3.24941	1.70018	7.7076	2.8229e-09	1.26705e-08	UP	137	137	137	23.1501	22.2442	23.5329	3851.94	21082.4	2917.7	3771.56	12045.3	3110.28	14617.3	14003.8	4611.53	5049.28	5042.54	31646.5	10363.3	5170.26	6329.39	3187.87	2474.69	12473	1138.65	26212.2	37004.4	25806	26564.8	19333.8	18166.6	28374.7	28924.2	25516.3	26893.3	28219.6	42730	51994	30225.8	24219.8	27270.6	31302.6	25390.2
M121T17	3.20235	1.67913	4.47961	0.000119598	0.000189792	UP	121	120.9	121	17.2857	16.825	17.7756	53249.9	60887.7	27703.9	36179	41627.1	13014.6	27408.8	18097.3	24370.6	27052.7	41596.3	185374	34422.4	55180.7	66879.9	55416	19537.2	17733	24510.8	214131	223361	8206.53	281402	8795.39	41077.1	149687	136295	94664.1	104492	10671.2	248527	192841	188780	75396	9870.48	231731	274948
M51T25	3.19845	-1.67737	-6.04146	7.04041e-06	1.46694e-05	DOWN	51	51	51	25.1892	24.8646	25.2003	32395	37935.4	54843.8	50811.5	40502.4	42246.2	18088.1	35961.9	32439.8	26498.9	70802.9	30092.8	11448.1	25572.2	17683.4	24840	14484.5	17982.5	18079.5	7650.58	5961.29	18028.3	5371.31	15383.4	11635.8	5500.12	11322.8	5574.69	13865.9	11844.5	11122.8	14101.3	9100.52	12707.7	9304.27	7778.16	7415.05
M47T22	3.19022	1.67366	4.14616	0.000408515	0.000564502	UP	47	47	47	21.8011	21.787	21.818	32473.2	27411.3	29008.7	25684.2	20416.2	34873.5	6302.11	13882.2	7401.27	6531.23	5068.77	28210.3	11996.2	6574.29	14077	10059.3	16966.6	17116.1	18300.5	122685	136691	145383	54880.1	7565.18	23882.1	50880.1	19683.1	54273.8	26666.1	15134.4	39753.9	29963.2	25023	18989.7	47037.4	44983.8	47594.9
M68T16	3.17819	1.6682	7.80255	8.90064e-08	3.22555e-07	UP	68	68	68	15.8677	15.8483	15.8872	14147.7	19046.5	12552.5	15273.8	15672.4	12051.9	17256.5	11567.9	18110.8	14977.5	22219.9	21727.1	10042.5	13812.8	8889.32	11691.7	10242.4	11508.6	12445.2	64284.2	62931.6	60371.4	44608.2	26375.9	13694.1	48741.6	34354.5	24161.8	39444.9	44260.3	71783.9	87113.2	45694	36384.4	50204.2	60517.9	54387.4
M67T22	3.17303	1.66586	9.33794	4.97471e-10	2.51729e-09	UP	67	67	67	21.6507	21.6406	22.0646	17448.7	18654.9	34637.4	36446.1	16634.5	14260.8	21743.5	18121.4	14930.6	20775.3	14018.1	21043	10481.3	10161	12378.4	12711.1	13519.6	12565.9	12299.2	39245.5	48232.1	44900.5	47756.7	124922	51545.6	59069.9	63898.9	60607.3	56643.5	46352	59009.7	53971.5	60933	50512.4	49627.6	46480.3	52252
M58T20	3.16482	1.66212	18.7742	0	0	UP	58.1	58.1	58.1	20.409	20.4052	20.4169	2904.54	3341.76	3272.2	3527.71	2178.31	2682.98	4043.67	1582.46	3521	4165.65	3368.47	4469.32	3423.39	2252.29	4490.11	3948.52	2912.57	3883.39	3025.95	9588.99	11442.8	9711.93	8615.56	13693.3	9559.91	10951.7	8949.8	9693.45	10099.1	9567.54	10496.1	11660.9	13121.6	8975.63	12018.4	10351.7	8442.55
M52T26	3.14435	1.65276	5.76683	2.61407e-06	5.94818e-06	UP	52	52	52	25.919	25.915	25.9268	5986.29	6131.78	12112	18321.2	5344.19	4092.43	2461.19	5136.52	3787.74	5074.39	9028.28	5810.21	1582.63	3249.48	2491.69	3631.85	3120.94	1483	2749.2	8918.43	17414	11748.8	6238.29	41585.2	10097.8	9962.98	15656.8	12148.2	16963.5	21359.1	16458.4	27956.2	17448.3	28280.1	12616.4	15920.6	11463.3
M41T20_1	3.14083	1.65114	26.5092	0	0	UP	41	41	41	20.4092	20.3999	20.6788	113551	118717	143502	153725	131129	119223	181676	80495.2	120781	119071	114420	152854	120478	155044	149972	135514	127638	103067	136009	357097	413318	361245	343694	465870	395568	347562	423945	351750	437430	410817	439745	422441	495893	377139	430528	415697	395335
M67T20_2	3.10432	1.63428	15.5035	3.4639e-14	6.41744e-13	UP	67	67	67	20.4091	20.4051	20.4169	18929.5	17559.5	21534	24242.4	19165.1	16767.9	22812.7	12340.1	21508.8	19178.6	14128.3	25951.6	17734.6	22799.9	18966.2	18608.2	19801.9	14255.4	14605.3	35415.3	55079.2	44965.4	42658.4	83058.1	58881.3	48328.6	62655.7	54573.2	68611.8	64777.6	66751.2	69732.6	74987.2	55878	64818	66723.6	54560.7
M91T23_2	3.08726	1.62633	6.42022	1.17292e-06	2.87204e-06	UP	91	91	91	23.3216	23.3071	23.3319	109148	107627	114256	93769.7	84522.9	116210	27582.3	61542.4	38575.5	34809	31719.2	84324.3	48216.6	42293	57852.4	48306.8	58029.8	58546.5	55995.4	363277	385817	408705	193514	77474.2	126123	177681	140190	192399	137292	115652	160372	164115	127592	128960	203301	180396	210359
M53T20	3.0728	1.61956	13.7023	3.55271e-15	8.00447e-14	UP	53	53	53	20.4052	19.9562	20.4206	13311.3	8836.24	21647.2	18078.4	11545.6	9714.48	11431.3	4898.55	9572.41	6683.96	7806.13	14265.6	9986.43	14131	12386.9	9830.39	11311.5	8351.24	9863.34	31673.2	35918.3	27533.9	28404.3	42288	30473.3	24965	25745.4	28384.3	35981	52108.7	35352.9	32269	42533	28957.4	36976	34858.9	37226.8
M103T22	3.06483	1.61581	4.65543	0.000114262	0.000182602	UP	103	103	103	21.8031	21.7903	21.818	58572	65139.2	54466.9	47188.7	53078.1	74179.4	12507	34092.6	22596.3	19104.6	9359.88	53127.4	26427.5	22956.5	33021.7	27380.7	36412	33838.7	32780.8	248419	244045	289236	119960	19219.1	56865	107731	46225.2	120615	67443.6	43613.7	87956.3	69131.2	60027.3	57053.3	105814	95492	111930
M42T19_2	3.04481	1.60635	15.7893	0	0	UP	42	42	42	18.5852	18.5774	18.5892	7596.81	7996.73	5776.99	5561.21	5207.48	4704.87	10003.8	7372.02	11159.3	9940.35	11798.9	4991.87	6356.2	4965.87	7372.93	8014.2	5882.86	7154.79	5415.08	16799.8	19634.2	20360.3	18970.3	22463.3	23241.1	16556	30283.3	18457.4	28540.4	23781.2	21568.3	18473.3	27170.5	24887.7	21360.2	25045.9	21564.4
M90T26	3.04293	1.60546	5.60137	3.34054e-06	7.42136e-06	UP	90	90	90	25.917	25.9111	25.9267	5205.78	3051.26	14353.4	16565.7	4664.67	4054.3	1600.36	5144.8	4709.43	5107.45	8740.47	5621.48	1170.07	2906.77	3304.05	2823.25	3003.95	1831.36	1651.03	9778.27	15077.6	10931.1	6861.19	37883.1	8111.1	9184.28	15728.5	12998.3	19149.5	16847	16491.4	24352.5	17317.8	26307.7	10500.2	14302.4	10287.5
M81T31	3.03892	1.60356	9.48542	5.96833e-10	2.94446e-09	UP	81	81	81	30.937	30.933	31.0104	7678.11	8461.03	8789.5	8414.07	6776.95	6929.37	6639.78	5206.89	9500.49	7245.8	6237.34	17069.7	6184.81	7517.47	4663.08	7795.73	8049.69	4749.95	6668.09	13402.9	18968.2	9096.93	14615.2	26496.4	26447.3	17815.5	26636.9	25682	28686.8	33129.4	29186.2	33903.6	26791	30801.1	19920.9	20778	18128.3
M63T26	3.03429	1.60136	6.48435	2.97373e-07	9.36866e-07	UP	63	63	63	25.919	25.9112	25.9388	22769.4	20462.9	47754.8	58922.6	16657	16535.4	10134.5	17592.1	23990.5	19134.3	28636.2	22831	5155.71	15352.8	9474.86	11547.2	12604.3	6955.14	11561.3	43400	61809.4	43737.8	26080.6	140417	33251.5	40020.6	63019.1	51099.9	64958.4	74655.4	56896.5	86335.3	65257.4	94192.3	45161.2	56072.1	43163.2
M107T25	3.00811	-1.58886	-6.24894	3.263e-06	7.26745e-06	DOWN	107	107	107	25.1927	24.7745	25.9505	119619	122613	178333	162085	131407	141825	62401.7	121074	105079	98401.6	231230	93598.4	49465.4	90948.9	66011	81528.9	60209.1	53868.2	62974.4	15072.6	17622.9	66096.2	17580.7	53960.7	38642.8	23338.9	39241.9	31265.1	46645.1	45482.5	39524.5	57563.2	40014.6	55160.1	30025.1	32474.5	19716.4
M91T23_1	2.99352	1.58184	4.98475	5.39745e-05	9.50743e-05	UP	91	91	91	22.9627	22.7046	22.98	108483	99199.2	90817	81961.5	88993	113959	49404.2	61176.3	32440.9	35917.5	31653.8	73321.1	46709.9	41700.2	60775	46640.2	52933.1	66651.2	59346.3	389526	407984	453358	201529	48179.5	102126	172898	55677.7	194506	116582	77959.7	147803	140034	100169	97358.9	191997	167568	201179
M75T22	2.96974	1.57034	4.25913	0.000300287	0.000425219	UP	75	75	75	21.8038	21.7903	21.818	33139	30613.2	28783.5	20733.4	26109.3	33172.5	6698.66	16046.3	10025.8	9303.66	4724.51	27273.3	9877.27	11709.4	14349.7	10770.1	15793.4	13673.4	16996.8	109802	127809	134570	52551.9	7832.94	27155.1	47913.1	21604.3	55389.1	28439.2	20839.6	41414	30389.1	26827.7	21674.6	48644	41985.9	48362.9
M78T26	2.96448	1.56778	5.97388	1.82844e-06	4.29012e-06	UP	78	78	78	25.919	25.5966	25.9385	19921.3	19234.9	36926	47308.5	16978.3	14797.1	8003.52	17953	20269.1	15339.7	28293.9	20299.1	5913.71	11042.5	9255.06	10827.1	10259.8	5922.59	9514.81	34447.7	52516.1	37268	20819.6	122917	27858.8	25754.5	55241.8	40792.9	61086.4	68248.3	46216.8	80044	56741.7	83480.9	38892.3	46136	38264.9
M108T25	2.90328	-1.53769	-6.06159	6.16334e-06	1.29692e-05	DOWN	108	108	108	25.1924	24.7894	25.1968	165459	167887	243569	225823	180524	194806	77911.1	168686	145192	133629	324579	122418	63648.6	124215	94463.3	109867	85089.7	76937.3	85279.5	30654.2	40316.7	88791.7	24689.7	76999.9	57961.1	28186.3	51491.6	42853.2	62079.4	62496.2	49882.6	73246.9	55538.9	73496	41855.1	41129.5	43395
M103T26	2.90259	1.53734	6.38659	3.89416e-07	1.17709e-06	UP	103	103	103	25.919	25.9034	25.9386	14830.8	15087.4	30830.1	41880.8	11914.3	13404.6	6406.36	13827	17790.8	15756.4	22223.3	16319.7	5372.4	10425.5	6761.94	8607.36	9958	5826.91	5879	31328	45345.2	33023.5	19770.2	96575.2	22155.5	28216.7	40673.1	32674.4	47856	52615.4	36137.4	60601.1	44386.2	64687.1	33976.7	37265.7	28598.2
M51T26	2.89453	1.53333	6.35061	3.91105e-07	1.18132e-06	UP	51	51	51	25.919	25.5966	25.9385	24907.1	25124.9	57501.1	72239.3	21228.4	17873.7	13481.8	22776.1	27337.7	24765.4	39075.3	29397.2	10969	16781.6	16261.5	15879.5	16073.7	8021.42	8288.5	51937.9	71425.5	54472.7	30393	161855	38768.4	47498.5	74173.5	58811	81772.9	89795	68093.6	104355	77180.6	110499	54169.8	66279.7	52617.7
M41T19_2	2.81369	-1.49246	-7.18927	6.73263e-07	1.80887e-06	DOWN	41	41	41	18.7415	18.7337	18.7502	135703	156564	187053	195530	100705	107770	98358.9	135985	125212	93488.8	119575	69841	57043.8	63127.4	71017.6	54474.5	107992	82292.8	78613.2	36277.1	36243.6	33492.7	27866.5	56120.8	29548.6	21971.9	33443	21653.2	50359.9	38885.7	44650.1	40482.1	42735.3	44370.4	36227.3	35033.3	34952.3
M122T26	2.80164	1.48627	6.06229	1.06435e-06	2.64077e-06	UP	122	122	122	25.919	25.9073	25.9346	144358	134804	327527	398087	132541	120969	77324.1	129392	150953	138226	211404	143212	52421.2	105378	90233.6	93170.9	95480.6	58725.2	71691.8	286143	378462	291573	156307	934587	221371	269509	406171	335749	444783	500336	343331	567623	432404	623155	288237	358990	277977
M92T26	2.80061	1.48574	6.124	8.52827e-07	2.17209e-06	UP	92	92	92	25.919	25.9073	26.5153	280557	283905	647434	812152	266486	244433	132087	271861	304451	295299	431057	279567	91788.2	217200	188926	190221	193080	119806	153609	569949	771322	599653	330461	1.87484e+06	441589	552879	813171	672356	906262	1.00413e+06	712504	1.14751e+06	873922	1.25068e+06	583629	719217	572279
M115T31	2.79819	1.4845	4.28154	0.000128243	0.00020123	UP	115	115	115	30.9369	30.9085	31.3113	11205.7	12170.8	9850.57	6756.89	8390.98	13402.9	35384.2	4835.2	10379.2	5865.29	5539.32	60688.4	7149.52	13208.9	7286.19	6523.07	4286.72	4564.66	3603.46	19036	24196.3	11322.7	16122.3	46693.2	29350.3	22485.8	44516.9	22542.4	37587.3	39798.1	32705.9	36017.9	38458.1	43746.5	28968.8	34184	28773.2
M124T31	2.7961	1.48342	3.37417	0.0026884	0.00307066	UP	124	124	124	30.6972	30.6404	30.7115	3259.73	5784.36	6425.35	6783.49	5921.72	4080.32	6721.68	1886.91	6443.66	2511.7	3397.36	15077.7	2554.07	3460.9	3225.04	4670.34	4743.21	5633.13	6911.35	54965	24681.6	27896.7	18640.5	9213.14	2061.14	6224.93	4108	3035.72	9367.49	3191.34	9413.35	16827.2	7466.22	5318.01	14085.7	13240.3	7556.71
M41T23_1	2.78715	1.47879	5.69327	1.20394e-05	2.40775e-05	UP	41	41	41	22.7279	22.4786	22.8211	88304.9	113976	92853.2	91202.3	102424	74701.2	94467.5	87907.8	97188.3	82033.5	87790.6	139712	81518.9	108767	109288	103738	64197.5	60944.9	67239.8	99287.5	106295	99844.7	159226	420256	125741	246149	354721	299912	467430	445281	308116	304253	419465	439109	138114	126158	124718
M68T21	2.78494	1.47765	5.73829	1.06538e-05	2.14835e-05	UP	68	68	68	20.9712	20.9522	20.979	26344.7	25149.6	35428.3	34390.8	30372	30386.5	27760.2	18008.8	15995.8	28736.8	26980.1	30196.4	28153.4	35668	34876.2	35542.9	34322.5	19212.7	22255	58675.6	67500.2	66417.8	45588.7	244138	90870.9	49735.1	48445.4	65404.5	76160.4	77306.8	74093	74526.6	76296	78340.3	86966.7	79851.7	85473.3
M79T25	2.77632	-1.47317	-5.82854	8.63586e-06	1.76779e-05	DOWN	79	79	79	25.1942	24.849	25.9306	185741	192894	270915	254874	202429	216563	66572.8	181858	164702	148401	359575	150862	76414.2	142640	108888	127908	89550.3	88011.5	93055	37471.3	48856.6	97122.1	29628	91134.6	59538.3	38178.7	63713.6	47755.6	79186.2	79338.4	68222.2	100217	64200.5	86586.4	27059.6	55965.2	56366.3
M89T23	2.76614	1.46788	5.51607	3.84342e-06	8.40096e-06	UP	89	88.9	89	22.9717	22.6968	23.326	7400.21	8618.47	21573.8	5494.54	5995.7	7731.08	2806.16	4634.22	20673.8	1846.38	2045.36	7878	4238.19	14728.8	5408.82	4203.34	5679.07	6036.28	4456.24	28551.1	27185.3	37313	17620.2	19827.5	23831.2	13859.8	7446.54	16111.5	18568.5	6190.19	11522.5	40149.1	6621.28	29777.4	18444.7	24062.7	17935.3
M65T26	2.75426	1.46167	6.18956	6.73845e-07	1.81002e-06	UP	65	65	65	25.919	25.9073	25.9346	78753.3	78038.6	175413	220572	76635.4	66433.4	40595.7	75613.8	84653.9	81601.2	119437	84768.8	26148.8	59857.2	49407.1	51806.4	49603.7	30341.7	45284.1	147404	210897	164015	96683.4	500233	118940	149244	223337	183270	248472	271426	202949	317086	235779	330095	161305	191583	155261
M91T26	2.7266	1.4471	6.16481	7.59564e-07	1.97402e-06	UP	91	91	91	25.919	25.6005	25.9346	539482	529895	1.18275e+06	1.46527e+06	488669	438784	297176	496436	557565	531343	787898	551557	206114	406890	353518	355095	358391	220410	299806	1.06048e+06	1.41554e+06	1.07691e+06	624385	3.35031e+06	798049	1.00228e+06	1.49014e+06	1.21708e+06	1.63048e+06	1.80893e+06	1.30075e+06	2.07315e+06	1.57171e+06	2.24864e+06	1.0737e+06	1.30501e+06	1.04044e+06
M89T26	2.71666	1.44184	5.89355	1.65504e-06	3.92515e-06	UP	89	89	89	25.919	25.9111	25.9388	19265.6	16648.3	40032.4	52486.8	17185.1	17852.4	9710.75	17236.9	19869.5	19259.2	25406.4	20443.1	8465.81	11612.6	9426.89	14182.9	10403.1	6667.19	9978.92	34385.7	48236.3	35852	22126.9	118697	28041	31412.6	52339.2	38288.4	60109.1	56514.7	49274.5	75328.3	54756	75297	31405.8	45793.5	37404.8
M77T25	2.6489	-1.40539	-5.93578	7.94189e-06	1.63824e-05	DOWN	77	77	77	25.1927	24.8606	25.198	107950	121729	170737	154712	126697	133434	57392.3	118226	103837	92143.8	226915	90646.3	44588.2	89368.7	71050.5	83451.1	61029	55641.3	58926.5	22891.6	33987.6	59286.5	17948.7	50663.3	41541.6	23777.9	34754.6	31471.6	50395.8	47510	38972.6	61931.8	43015.1	58781.2	34133	38742.5	32362.5
M91T22	2.64179	1.40152	4.62275	0.000109621	0.000176266	UP	91	91	91	21.8005	21.7864	21.818	40805.5	39126.2	33009.5	35258.9	37323.7	44613.4	7921.12	19214.1	14848.8	15075.9	10844.3	40096.1	14367.2	18133.3	22845.3	20605.7	19085.1	18089.3	21153.5	119256	139864	145111	68218	20831.6	28980.5	61795.8	31046.7	70449.8	35757.8	18238.9	51683.2	46509.1	32824.1	28253.9	66073.7	61184.4	65039.6
M67T12	2.64028	1.40069	4.94677	2.36331e-05	4.46586e-05	UP	67	67	67	12.4962	11.95	13.1689	12871.8	9080.09	32500.1	11950.1	16994.4	14719.1	64713.1	60229.6	31804.7	73434.6	30789.4	14525.9	17290.6	15098.2	18674.4	19571.1	16532.4	15714.5	21700.4	70567.8	65845	76155.3	7254.67	5398.49	55725.3	5952.43	165998	61006.2	84735.3	61717.8	62015.3	81013.2	79531	74869.3	86020.6	75150.5	86973.8
M157T18	2.57763	-1.36605	-4.88184	4.22493e-05	7.61563e-05	DOWN	157.1	157.1	157.1	17.5232	17.5077	17.9282	350546	143158	269320	173868	335331	465485	318431	54258.3	281635	83057.3	85032.3	206028	213459	244968	347080	210211	156737	122004	171503	64022.3	43871.1	42874.6	46869	258064	54453.8	74057.2	88843.6	23278	64483.5	104095	41676.7	12466	50414.1	126480	111179	146113	94912.9
M59T15	2.573	1.36345	3.16395	0.00370882	0.00402889	UP	59	59	59	15.1387	14.5749	15.1878	156553	231385	64935.1	37334.1	63859	45562.4	30800.4	17216.4	26631.6	30174.8	14408.3	43740.4	28570.7	53168.5	28673.9	83864.1	84507	24749.8	38114.1	108881	147768	120298	78577.8	49726.6	30032.8	79065.8	60102	43767.6	86262.2	93109.4	176272	244998	163249	172793	115403	113550	88833
M43T20_2	2.55394	1.35273	17.996	0	0	UP	43	43	43	20.4092	20.3961	20.417	175388	129995	202429	230925	141104	129285	226953	90415.8	131835	150485	122419	264943	189052	158857	158684	208816	124327	112788	132200	352162	431705	371557	354405	448815	397275	351776	422892	358180	439960	419083	447056	427145	497533	376996	435364	422393	405850
M72T18_2	2.5269	-1.33737	-5.19308	1.83389e-05	3.5519e-05	DOWN	72.1	72.1	72.1	17.5193	17.5075	17.5311	34010.4	20600.5	33995.2	20795.4	34649	45791.3	33680.9	9131.92	31758.7	7051.89	9901.54	15514.8	20926.5	24860.6	34760.2	22941.7	16412.3	14098.6	18282.5	9146.03	6072.1	5612.58	3782.5	24953.8	7404.88	7448.62	10341.7	2944.45	7812.92	10441.4	5688.61	4642.7	4622.36	15286.1	9097.19	13903.5	8337.71
M54T21	2.48771	1.31482	5.2609	3.14474e-05	5.793e-05	UP	54	54	54	20.9712	20.9572	21.1919	14782.5	11559.4	19313.4	15241.6	17186.5	13808.7	22039.4	9684.8	12843.4	10790.8	15981.3	19118.6	15592.7	18479.3	16560.8	14456.4	18796.7	14086.7	20487.9	26480.6	36203	35813.5	19206.1	123301	47481	24637.1	35717.7	31711.1	34342.1	40318	32230	32355.6	36866.2	40787.4	40355.7	39971.7	39553.2
M91T20_1	2.4477	1.29143	4.02332	0.000623947	0.000826684	UP	91	91	91	20.1595	20.0847	20.2164	831140	965112	678289	680607	778440	673859	693568	531532	622247	621094	576736	490487	535726	877723	727980	935071	474375	499281	601163	3.69346e+06	3.6934e+06	3.33112e+06	1.46648e+06	709628	620064	2.37953e+06	615874	926367	841564	705769	853406	1.01646e+06	854424	724137	1.35911e+06	983321	1.3426e+06
M77T26	2.43801	1.2857	6.18422	6.3371e-07	1.72939e-06	UP	77	77	77	25.9191	25.6005	25.9464	37415.5	35376.7	64702.5	76465.5	30944.5	26911.5	23753.3	29105.7	35017.6	37366.6	46266.7	37188.3	13709.6	28378.2	18567.1	21114.8	18543.2	10356.4	18875.1	62335.2	78040.6	64517	40958	170494	34982.2	51690.1	81014.5	64124.3	90323	94452.7	75805.9	115274	87434.4	109980	62934.8	72728.1	60094
M113T22	2.42296	-1.27677	-5.20589	2.24014e-05	4.25722e-05	DOWN	113	113	113	22.2285	22.2207	22.5293	34649.4	34449.4	53770.1	65623.4	31043.9	38661.1	17169.6	39319	32587.3	22513.9	29956	42647.5	13765.6	14194.7	24434.2	12115.7	22248.3	31257.3	21365.5	15649.4	30364.6	15192.1	5102.79	16926.7	6576.81	2806.08	8328.47	4676	19993.7	11163	12370	12332.1	11817.7	15591.9	7810.16	9225.95	8017.49
M127T15	2.42056	-1.27534	-1.85901	0.0721833	0.0497042	DOWN	127.1	127	127.1	14.9731	14.5201	15.2069	253289	155626	164309	215022	181285	237747	305559	62296.8	202443	72183.9	112024	208095	275011	209146	273587	143795	1.42937e+06	116699	256479	84135.5	30736.5	21939.8	25200.4	137291	67691.6	16158.1	88571.4	44717.1	40850.9	996449	47315.3	35378.4	36321.4	80925.4	54733.4	41020.6	3711.9
M165T31	2.41825	1.27396	2.62827	0.013054	0.0117765	UP	165	165	165.1	31.3022	30.9234	31.3163	1232.29	23420.7	17983.2	17956	21621	443.369	574.083	19913.3	1294.64	1454.9	913.683	2187.64	20727.1	683.74	17169.4	866.138	549.726	438.727	511.102	5801.42	13240.9	33496.2	8783.74	10928.7	9958.22	8999.76	17615	12899.9	12414.7	12971.2	17163.9	17573.9	20530.5	10105	15601.6	16799.1	13797.1
M158T18	2.41562	-1.2724	-4.29183	0.000214273	0.00031612	DOWN	158.1	158.1	158.1	17.5231	17.5075	17.5273	37773.6	15810.2	30532.6	18859.7	36360.1	54779.9	34054.3	6155.82	35373.4	7018.46	8841.58	20540.9	20514.9	30335	43489	25319.8	15698.6	11930.5	18195.7	5422.53	1952.67	4857.68	4788.22	29068.1	5537.66	9730.01	13521.4	3032.87	10026.5	15755.8	3895.37	4826.28	5327.69	17528.4	12346.9	17112.9	14402.9
M55T23	2.40633	1.26684	4.88051	8.04e-05	0.000134809	UP	55	55	55	22.7243	22.4708	22.8248	69022.9	68765.6	80945.5	88298.4	82380.2	73388.2	81583.2	95552	106981	73972.1	99012.1	117491	83215.5	90252.1	84644.9	98780.8	77201	61095.6	54260.6	79101.6	122267	75261.6	152872	200230	217008	109010	197184	315613	120081	379874	333874	322588	347659	375184	119429	103720	116908
M92T18	2.3827	1.2526	9.42952	2.50322e-11	2.07824e-10	UP	92	92	92	17.7794	17.7726	17.7884	10384	12813.4	4950.36	8705.65	9212.26	5645.64	5651.06	4874.53	6221.59	6356.31	6582.54	10484.1	7839.46	12691.2	12758.6	9856.75	3415.86	3280.39	6574.38	16626.1	17896.7	16731.9	13984.3	14347.2	12020.9	19264.6	23632.9	19369.9	22433.6	20111.6	24780.3	26655.1	26188.8	17842.7	17959.7	18429.7	16293.5
M85T15_2	2.34901	1.23206	7.27503	1.14183e-08	4.7777e-08	UP	85	85	85.1	14.8729	14.2272	15.091	40344.9	40086.3	32424.8	43662.8	10203.6	69632.9	81987.2	38894.7	9156.45	84722.6	28486.5	90982.9	9458.82	55402	55336.4	51820.7	61006.5	38572.3	40802.2	162689	145549	168205	98209.2	69910.9	71309.3	142936	96714.1	99205	79692.4	94092	136913	146799	88865.8	93866.5	86471.8	80727.5	86349.4
M117T15	2.3318	1.22144	4.4613	0.000165538	0.000252672	UP	117	117	117	15.0426	14.4073	15.196	24303.2	21928	18079.3	25527.7	22068.5	16667.4	13298.3	11478.5	27600	28309.3	14246.9	25808.6	13177.1	12683.9	16411.3	14021.4	8154.91	8717.17	7709.02	57883.6	63825	49083	60545.4	25833	18613.9	16767.8	71753.9	19021.6	12181.7	26829	38487.8	67452.2	10369.8	75528.7	63168.9	61323.2	52723.3
M136T12	2.30901	-1.20728	-5.04027	4.15555e-05	7.50092e-05	DOWN	136	136	136	11.5132	11.5029	11.5297	46644.6	40636.1	87314.7	101607	45729.5	62608.4	26180.1	47508.3	51961	36966.4	36354.3	38324.7	31185.2	18293.8	36324.7	19835.6	39791.8	36728.7	52432.7	29440.1	27708.2	28891.7	5280.89	23485.6	11936.5	6777.05	13941	6528.41	33939.6	17184.8	22836.3	22046.2	16244.4	32069.7	13446.3	15955.5	17406.6
M80T18	2.29688	1.19967	7.46749	2.09448e-08	8.44984e-08	UP	80	80	80	17.7769	17.1193	17.8034	22688	25916.4	13147.7	11173.4	22417.4	13366.5	13184.1	13589.2	15386.2	11436.8	19233.7	26635.4	13326.1	27563.4	9578.23	24820.4	12559.6	10785.3	12220.7	23291.9	31090.5	30910.9	33609.2	38344.8	23678.1	38557.1	48047.6	39843.8	46657.8	47714.2	57210.4	67087.6	54498.6	43349.3	35427.8	33205.6	35075.4
M94T12	2.29382	-1.19775	-5.02589	3.06307e-05	5.65742e-05	DOWN	94	94	94	11.5129	11.4979	11.5216	49819.7	45080	75337.4	89850.3	36560.7	52463.1	29208.8	45103.7	44153.2	38975.3	37776.8	41468.6	21673	15680.1	29890.9	15780.5	35034.8	37824.2	36225.4	23050.5	30904	28141.4	7752.95	25594.7	9359.8	4120.24	7460.19	5604.16	25357.2	12981.8	16276.9	18503.3	12477.7	26619.7	12329	10166.7	11513.6
M139T10	2.2453	-1.16691	-3.24174	0.00346597	0.00380944	DOWN	139.1	139.1	139.1	9.62229	9.57555	9.65118	53980.9	42673.5	74197.5	70863.4	30126.1	36450.1	17582.9	18569	17642	18558.6	21029.6	10051.7	12032	9159.22	14804.9	9990.65	27612.8	24535	26850	15370.1	20327.6	18232.4	2936.4	27641.1	7767.5	2206.94	2912.91	2895.65	22609.5	11891.6	10393.8	1085.12	9921.01	26825.9	6838.97	8820.61	6941.3
M186T18	2.2319	-1.15827	-4.20124	0.000239723	0.000347596	DOWN	186.1	186.1	186.1	17.5231	17.5075	17.5291	76240.9	32140.2	64207.1	36902.4	80359.3	114712	73555.5	18568	78563.8	21300.5	19636.5	46487.7	48366.6	63475.7	89571	56705.8	33619.6	29031.7	36809.2	13637.6	9356.07	10011.3	11206.7	68628.7	12319.1	21684.6	26187.6	5490.35	22751.1	31406.6	14378.2	10415.5	14654	42381.4	31092.5	41002.3	32677.8
M67T21	2.20875	1.14323	5.52844	1.62569e-05	3.17984e-05	UP	67	67	67	20.9712	20.9481	20.9796	35438.8	33026.7	39381.1	43557.9	33831.6	39868.4	42872.1	23595	26062.9	28215.1	37813.8	36883.5	31519.6	44486.7	36934.8	38541.2	43650.6	26620.3	39887.1	59734.1	70188.9	61493.6	51682.4	228366	81111	53367.7	71966.5	65189.8	77826.1	77305.8	75751.8	73468.8	75413	67298.4	84836.9	82571.4	77991.3
M57T6_2	2.20205	1.13885	2.45703	0.0187699	0.0161696	UP	57	57	57	5.50085	5.4928	5.51435	693638	0	0	0	372078	627809	0	0	713858	0	0	889645	0	0	0	0	533261	0	0	876473	0	656112	507107	0	528403	601417	0	712174	0	674863	534644	810827	0	741668	390829	573245	437646
M86T21	2.17779	-1.12286	-2.64493	0.0153157	0.0135313	DOWN	86	86	86	21.2682	21.1275	21.673	369886	125254	633667	824941	235050	291419	72626.6	203930	183898	224405	159607	107052	81426.6	92235.9	181304	95651.7	191309	96410.6	141183	128045	120817	94378.1	26723	201387	63651	28088.8	49921.7	34835.8	201311	58893.2	93614.4	98508.8	146215	219321	78272	87964.5	100092
M107T12	2.17652	-1.12202	-5.06792	2.57324e-05	4.82908e-05	DOWN	107	107	107	11.5127	11.5007	11.5216	62558.8	56974.8	98260.3	117424	49170	65177.3	36569	54923.5	57012.8	54259.5	49349.6	51759.3	36802.7	24011	40525.5	20007.6	51129.2	51081	53434.8	38659.7	44810.3	36956.7	11673.3	34731.8	12048.4	7732.05	17925.4	4019.08	35696.4	16013.5	21018.8	26190.4	15807.3	35045.1	17853.8	19827.7	19134
M79T12	2.16632	-1.11525	-5.36354	1.38107e-05	2.7332e-05	DOWN	79	79	79	11.5131	11.5017	11.5296	42924.6	45311.5	78670.2	91621.9	41820.2	58131.3	29908.1	47804.4	44583.6	45096.6	40822.6	43823.8	28717.7	21514.9	31061.9	19756.6	41932	37557.8	41079.4	31704.4	23185.3	29792.4	9283.8	25608.3	11206.3	8018.87	15046.7	7006.98	31679.3	16315.4	21131.9	20787.9	18420.9	32453	14048.3	15126.3	12600.3
M121T22	2.164	1.1137	3.42228	0.00211325	0.00248581	UP	121	121	121	21.7991	21.2759	22.1571	17609.8	16301.7	17390.8	13078.8	18078.8	17765.6	4212.28	7378.87	6971.2	6505.72	28389.4	20566.9	7545.14	26429.4	9798.48	22701.2	8461.1	7904.07	8732.76	66156.4	72082.9	77403.5	28274.6	6934.58	11641.6	28576.7	12739	30956	16950.2	11569	21858.3	19886.2	11807.1	13083.7	27258.9	25484.6	27649.9
M128T15	2.15269	1.10614	2.86813	0.00694738	0.00676169	UP	128	128	128.1	14.9731	14.5267	15.1962	20283.7	13678	28923.4	18969.2	23703.8	32383.4	25863.7	6498.48	17695.1	6629.79	7665.74	21141.8	24156.3	24766.8	29300.5	19099	125495	10875.2	24349.7	94516.2	102492	74832.2	99513.4	16919.9	4668.75	42777.7	7570.92	24868.1	6713.09	109268	57838.6	72757.7	6187.42	20185.4	97200.5	94484.6	86169.1
M142T18	2.12966	-1.09062	-3.90002	0.000556253	0.000746657	DOWN	142.1	142	142.1	17.5228	17.5075	18.3358	85612.8	37654.8	68394.4	39984.5	84719.4	121112	76745	19985.1	81397.9	4480.33	23294.6	48954.6	52373.5	69662	96683.4	61802.9	38994.3	31323.8	37974.1	13907.3	9155.76	12015.9	11873.5	71357.6	14491.4	25645.9	34093	9073.62	23146.5	38046.1	13166.3	15208.7	15866.6	50637.1	32441	45264.9	34444.4
M93T18	2.12774	1.08932	7.90759	3.29787e-09	1.46354e-08	UP	93	93	93	17.7814	17.7719	17.8034	60287.1	80599.3	31070.8	48204.7	58112	41045.2	35950.3	32623.7	45637.6	39808.2	56892.1	68382.9	44284	78181.1	76991.7	62182	28923.7	29354.5	36607.2	87326.9	84185.3	70200.5	94678.6	88233.9	72470.9	107477	129535	100425	121717	136199	148635	169096	147162	121345	108186	111355	104900
M141T28	2.1017	1.07156	4.30236	0.000137703	0.000214424	UP	141	141	141	27.7386	27.0195	27.7467	45278.8	34448.6	51406.5	39347.5	44406.7	28417	19275.1	17211.9	24260.6	17570.1	9821.45	92527.9	20198.9	57614.1	52799.1	50810.4	21537.8	24777.5	6157.19	31347.7	55625.6	41301.9	108254	101921	92951.9	131761	156494	126098	56603.9	60172.9	73381.5	56765.4	73671.5	52133.4	52411.1	64762.6	47606.4
M53T21	2.08856	1.06251	5.21581	2.91348e-05	5.40725e-05	UP	53	53	53	20.9712	20.9605	20.9753	9012.27	7932.23	9718.19	11129.1	7632.12	9053.85	11486.9	6787.49	5712.8	5456.46	8286.32	10450.6	8300.7	10823.7	12013.1	6782.42	10947.6	7472.63	10370.7	13820.9	18944.9	14323	12340.4	52818.2	20495.6	11797.2	14720.2	15730.7	19033.2	18886.3	15838	16165.1	17947.6	17040.8	16087.3	17905.1	18209.5
M86T15	2.08793	1.06208	5.71137	4.76961e-06	1.01971e-05	UP	86	86	86.1	14.8755	14.524	15.3754	28112.8	21723	36560.5	37319.8	32068.3	54178.8	64873.4	31770.1	51834.7	51501.1	19002.3	54980.4	58617.6	39756	42309.8	32295.6	54079.5	34967.8	31855.4	126971	141807	3466.26	80812.8	51709.7	55778.4	117857	86022.3	98264.5	68923.8	71286.3	130057	143454	79119.9	69124.7	73200	66322.1	76048
M73T12	2.08773	1.06194	1.68709	0.106922	0.0676815	UP	73	73	73	11.6187	11.3012	11.9568	22085.2	19961.5	22553.5	22001.9	14313.5	21838.2	22318.3	20257.3	22276.4	21473.4	20077.5	33928.3	32839.4	15061.8	17459.3	17690	18120.4	21018.6	22309.1	23669.1	23276.6	19875.9	43602.2	309699	21685.8	61611.2	35720.3	26052.8	41610.5	73398.3	17217.4	38645.7	18299.8	69810.7	22243.1	20423.4	16245.2
M141T18	2.08327	-1.05885	-4.23498	0.000222393	0.000326282	DOWN	141.1	141.1	141.1	17.5194	17.5077	17.5291	901336	388041	707232	475249	885329	1.22968e+06	813347	196436	839516	238773	260367	529826	551541	724193	1.00209e+06	640062	404093	333064	441129	182037	111037	137531	159290	731044	180882	257305	341600	113739	268230	402450	167796	159970	173042	514030	371588	469118	372258
M45T20_1	2.06289	1.04467	10.2651	5.64837e-12	7.07933e-11	UP	45	45	45	20.4051	20.3975	20.6666	22656.4	17745.4	20013.8	23089.1	18237	20527.3	52431.3	15818.8	21074.5	24252.9	17242	22337.1	18934.1	20758.4	19163	20057.1	18211.3	17674.1	19285.3	50399.3	51654.8	44285.5	44455.1	36864.2	36803.5	36515	43202	34085.3	42977	44111.7	44239.3	46514.3	55104.5	38305.4	42152.9	47370.5	42291.1
M94T10	2.05918	-1.04207	-3.24749	0.00352241	0.00386091	DOWN	94	94	94	9.6231	9.52515	9.65118	118601	105716	181960	193285	74779.3	91916.3	38687.7	50421.5	52181.7	54761.2	49550.9	61505.1	28973.5	27652.1	46905.6	25900.6	69204.2	58690.5	62183.3	29832.3	41894.9	36534.6	9061.04	75594.2	24259.1	7792.95	22745.6	11178.6	59740.7	35419.2	35521.8	34671	31484.1	77194	21363.3	31639.2	26406.9
M57T18	2.05436	-1.03869	-4.54583	8.45468e-05	0.000140702	DOWN	57	57	57	17.5192	17.5041	18.0268	524180	278393	526467	358125	588241	833307	406650	468231	588539	191198	173287	354679	331663	520912	680612	429713	248708	251402	245599	111765	76655.4	76490.8	122905	530403	145219	185047	234389	80025.3	204822	291997	151862	138506	166165	361348	296489	322429	285317
M56T23	2.04638	1.03308	4.96165	4.99609e-05	8.86964e-05	UP	56	56	56	22.7247	22.7126	22.8221	29281.3	38049	39968.3	52432.4	48648.8	42667.2	34995.5	58465.4	60274.4	40578.1	49131	65622.5	33400.5	55525.5	51006.6	50895.1	33504.7	27900.5	32222.6	33295.2	58975.1	27788.6	132476	133080	147424	56799.3	78370.5	68456.1	126785	111988	108949	85952.3	119997	196986	72754.7	75287.1	78728
M70T18_1	2.04207	-1.03003	-4.66194	6.68193e-05	0.000114874	DOWN	70	70	70	17.5192	17.2623	17.5291	890957	430742	751998	542779	849558	1.14784e+06	780607	257154	798158	265841	283585	525494	533134	680342	924643	604654	430802	350436	444820	193916	141838	148539	166205	690241	185420	253467	342174	124542	284628	389665	194167	182052	206715	501978	377271	465315	362306
M88T18	2.04012	-1.02865	-4.22079	0.000227107	0.000332129	DOWN	88	88	88	17.5211	17.5041	17.5291	4.18226e+06	1.84283e+06	3.31156e+06	2.22591e+06	4.14571e+06	5.74639e+06	3.76333e+06	1.03351e+06	3.92632e+06	1.15558e+06	1.23578e+06	2.48327e+06	2.57914e+06	3.40596e+06	4.66519e+06	3.00044e+06	1.87993e+06	1.61027e+06	2.077e+06	854954	550672	651247	763128	3.41379e+06	861517	1.21695e+06	1.69132e+06	554616	1.27583e+06	1.8917e+06	831713	801772	909510	2.47464e+06	1.83601e+06	2.27898e+06	1.75443e+06
M105T26	2.03981	1.02844	5.78277	1.39902e-06	3.37166e-06	UP	105	105	105	25.9444	25.9346	25.9587	21868.8	20869.8	14659.2	13354.8	17850.8	11893.5	8035.69	10498.9	18477.2	14778.7	17252.4	23023	6357.15	9127.32	10982.8	11208.8	4733.29	3363.74	5694	26917.9	34564.5	22592.5	38711.7	30078.5	7446.55	17438.9	23068.2	12453.5	24472.6	20731.6	38050.2	39084.4	21669.6	20583.9	32353.8	35228.9	32329.3
M84T18_1	2.03685	-1.02634	-4.31917	0.000185429	0.00027909	DOWN	84	84	84	17.5192	17.5077	17.5291	184062	96288.6	184370	136650	199603	267127	118511	56031.7	178995	64424.4	66774.7	108270	127635	143767	217231	135519	67887.7	67247.3	86114.6	36665.2	37174	28524.5	43439.1	159098	29952.8	54741.1	75332.6	28235	72787.9	88033.2	44976.5	44759.5	40051.4	104352	79664.6	106629	83504.1
M60T18	2.03475	-1.02485	-4.23932	0.000213573	0.000315239	DOWN	60	60	60	17.5192	17.5041	17.5291	724671	322850	576886	393587	724589	996015	657889	181912	682141	206006	215960	433957	447395	589611	812557	522252	330587	282457	364721	151893	98598.4	113443	125430	597233	152584	212245	302687	99741	217788	322532	146448	141815	157323	432273	317710	399431	308570
M61T18	2.03165	-1.02265	-4.20939	0.000233682	0.000340223	DOWN	61	61	61	17.5193	17.5041	17.5291	619974	274419	490675	330293	613568	844302	556504	151668	576147	168016	181736	365367	381497	502416	689222	442358	277334	238485	310381	126208	81366.3	97809.2	113285	503700	128712	180514	251024	79838	189577	277504	122337	120037	136640	365724	272491	340507	261033
M88T19	2.01779	1.01278	3.52255	0.00204489	0.00241428	UP	88	88	88	18.5853	18.5812	18.8673	3950.57	2770.27	29946.9	2122.32	17659.6	52740.8	3484.8	5772.52	7920.82	3592.25	7534.71	2740.93	2979.25	20531.4	22758.3	2275.66	13083.3	1842.71	2066.48	17105.9	18866.5	19454.7	19036.9	22153.4	27741.3	17833.9	28237.6	17754.9	25681.6	24959.4	22659.2	19891.2	27586.5	17878.6	21652.4	27427.7	23155.4
M87T18	2.01589	-1.01142	-4.09443	0.000314768	0.000443244	DOWN	87	87	87	17.5192	17.5041	17.5291	145484	65558.3	117362	78109.6	144731	200875	123199	33104.3	138022	38339.6	43580.8	82589.7	92159.3	120697	163560	103887	64510	56850.4	69234.7	30104.4	18968.7	22702.2	26392.9	121946	31080.7	40185.9	61426.1	17642.3	46444.3	66504.6	28004.8	27175.5	33802.3	88491.3	65274.2	79085.6	64484.2
M67T18_2	2.00361	-1.0026	-4.94714	3.65791e-05	6.66877e-05	DOWN	67	67	67	17.5192	17.5114	17.5273	114685	70497.7	101244	79844.4	110386	148154	96050.8	35756.6	103264	37760.3	39469.9	67811.3	71121.4	82456.7	109780	72188.2	60229.7	44891.5	47150	29794	26453.9	23504.1	23158.6	79676.1	24806.3	33750.1	38084.1	18794.1	40426.6	51756.7	29150.6	25210.3	29802.7	67883.1	48245.9	59846.1	50966.1
M69T18_1	1.99526	-0.996576	-3.77294	0.000765676	0.00098795	DOWN	69	69	69	17.5154	17.0682	17.5312	320703	150281	311267	198253	341154	479374	133009	116328	350602	111254	124236	152854	174189	290764	416496	227711	147587	119782	129792	48660.2	53702.7	55237.5	60969	291952	70277.3	105249	148240	59936.8	115676	178594	92355.1	82364.1	94728.6	217754	159092	200884	143359
M71T18_1	1.98471	0.988929	8.48043	3.35774e-10	1.77317e-09	UP	71	70.9	71	17.7797	17.768	17.8974	91556.7	127017	62086.6	64137.8	85192.4	64649.2	55510.9	54084.3	69023.7	65762.6	79011.9	109909	59400.8	113499	107283	87583	57293.9	38167.2	58242.3	109766	163721	119799	133323	149179	100383	146049	174654	134387	169950	183320	197802	226837	196063	161327	142490	152126	137118
M74T21	1.96781	-0.97659	-1.93087	0.0675558	0.0471802	DOWN	74	74	74	20.6823	20.6572	20.8517	31907.6	26579.5	36559.8	38667.3	22784.7	19106.2	191577	17503.6	16005	15440.7	22478.2	138613	54734.9	10557.7	11137.7	13128.1	55800.5	48594	45715.8	28089	29493.2	24126	12242.6	15421	13375	11658.6	22354.5	12584.8	14082.6	19561.6	15277.1	17585.9	18758.8	15762.8	13892.4	13811.7	14428.2
M43T25_2	1.96571	-0.975051	-1.84177	0.0817728	0.0547993	DOWN	43	43	43	25.2499	25.0491	25.3318	156568	188752	127888	120484	142060	136481	189851	115722	123979	111796	102660	1.41087e+06	428470	338129	262257	352918	107616	193982	233201	91181.1	111510	91977.4	95642	138612	149265	95922.4	110013	107151	150893	161750	163390	158575	139445	124977	160900	191650	133528
M42T18_2	1.96505	-0.974566	-4.49108	0.000102609	0.000166543	DOWN	42	42	42	17.5191	17.5041	17.5273	252637	133252	227157	166481	257146	343187	203189	77567.7	242995	83588.1	83691.4	159005	159011	208794	280480	179235	130534	103564	126814	56226	37557.3	47593.8	57253	216465	57378.3	82706.4	108289	43380.4	89697.7	120619	62235	54645.5	66399.3	156717	119233	141702	109789
M101T18	1.95881	-0.969976	-4.00023	0.00039216	0.000543675	DOWN	101	101	101	17.523	17.5041	17.5291	1.61572e+06	715848	1.27368e+06	862944	1.59793e+06	2.21237e+06	1.46475e+06	398098	1.51211e+06	445557	469186	965227	998143	1.31343e+06	1.79928e+06	1.15384e+06	725798	623241	802021	335295	226921	258527	354390	1.47808e+06	352266	503825	678234	238752	499854	747662	339753	323021	363586	963059	710407	883000	685437
M73T18_2	1.95774	-0.969187	-4.10299	0.000302457	0.000427933	DOWN	73	73	73	17.5211	17.5041	17.5291	882945	397060	704317	479019	873969	1.20192e+06	805556	227474	827303	248365	268573	531626	549186	720202	979814	635290	403917	344414	442929	194959	129475	149730	188753	763112	192490	271335	367829	131331	277695	411314	186180	180551	205672	530955	397915	492883	382873
M101T15	1.95662	-0.968366	-1.79661	0.0805578	0.0541488	DOWN	101	101	101	14.9692	14.6118	15.1335	379866	258718	446781	349496	382999	519154	417993	135623	346666	151318	202686	355179	379726	462900	489066	345886	1.93287e+06	220733	391941	37656.9	54360.2	35374.8	112970	304234	49628.5	69583.8	25764.1	90820.1	37610	1.70705e+06	350207	55250.7	316485	284514	190938	194594	169862
M41T18_1	1.94728	-0.961464	-4.59581	7.83096e-05	0.000131805	DOWN	41	41	41	17.5191	17.254	17.5291	783378	398343	663343	483283	750646	1.00446e+06	688509	237473	707876	245811	266179	474990	481619	608485	814553	537195	386714	318263	401695	181925	145995	149629	165160	621060	173535	239412	317294	123418	265133	358924	187310	176196	199501	455199	349941	424784	335293
M51T17_2	1.94704	0.961282	3.14383	0.00340939	0.00375758	UP	51	51	51	16.5052	16.3176	16.5158	6431.46	6602.73	2158.33	2722.07	4692.53	4414.81	20257.5	1977.05	2452.37	2307.38	2742.32	11623.5	11824.6	7638.18	5582.79	10223.3	4647.72	4830.7	4294.51	13844.5	17894.6	18112.4	3637.88	2523.65	991.882	2931.08	1524.77	2254	11198.5	13251.4	16770.7	14386.7	16770.5	10698	21598.1	22606.4	18942.8
M55T18_2	1.94071	-0.956587	-4.55666	8.2984e-05	0.000138492	DOWN	55	55	55	17.5192	17.5077	17.5291	832846	425982	715759	528534	797214	1.0732e+06	696508	259049	753632	255622	280223	510951	507533	648309	869535	572356	413284	349408	427299	196459	155052	153082	177826	696124	180023	259842	340169	139799	283837	383899	205839	185158	213684	487781	375568	451329	351349
M73T21_1	1.9317	-0.949869	-2.70264	0.0118153	0.0108194	DOWN	73	73	73	21.268	21.1235	21.4975	105344	71819.3	142887	175258	69016.5	66950.6	22885.6	45195.2	46487.1	40534.9	35038.8	58382.9	22595.9	21928.2	30207.1	14854.7	81974.4	47603.9	49215.4	21609.8	36173.7	38935.6	10349.1	54766.8	16180.6	7148.94	14911.3	11125.8	46705.3	103881	23804.9	22300.1	30029.1	59608.3	18588.6	20060	16934.6
M53T12	1.92989	-0.948522	-4.55195	0.000123938	0.000195566	DOWN	53	53	53	11.5132	11.166	11.849	24562.6	5745	38186.4	44109.6	19360.7	30523.7	15615.9	16896.2	23300.9	16890.1	21551.5	24505.7	12165.4	12878.6	18230.6	13553	21597.8	21214.7	22527	15430.5	15594	15527.2	4135.35	15144.6	7379.38	6110.11	9406.15	3535.41	12937.7	8319.54	12258.4	10190.2	8970.56	14726.7	8623.15	10194.9	7325.16
M115T18	1.92013	-0.941207	-3.84042	0.000612065	0.000812788	DOWN	115	115	115	17.5232	17.5041	17.9245	313750	135436	246956	168935	313848	432689	236266	73342.9	295394	87150.3	90589.5	186909	194282	257407	352073	217355	135112	117418	148266	51886.1	48776.2	52094.6	51791.3	264078	65425.8	101904	136666	43641.8	95210.9	152202	69536.3	70447.3	71813.4	193009	141217	181723	142913
M81T11	1.90538	-0.93008	-4.62398	8.06139e-05	0.000135116	DOWN	81	81	81	11.4977	10.8143	11.5217	40812.4	39999.4	60587.8	75213.6	33145.6	41420.1	20824	35545.7	37016	34709.6	32059.1	34369.7	21564.9	18560.2	23437	18125.1	34461.6	31577.6	32824.8	26263.3	28529.9	24445.2	8327.92	21307.9	9502.21	5956.98	11258.1	4204.21	26098	14496.8	30237.6	17157.7	16148.1	22632.3	12769.4	15143.4	19359.1
M54T18_2	1.89991	-0.925927	-4.69593	5.62013e-05	9.85702e-05	DOWN	54	54	54	17.5193	17.5075	17.5309	65978.1	33138.3	63017.7	46106.5	58669.3	79963.7	47078.3	25515.5	60638.7	20670.6	20520.8	40154.5	39046.6	45575.9	63663.1	42368.2	33791.8	28618.6	32291.5	17197.5	15526.9	13617.4	15237.9	54533.1	12365.6	19358.2	25386	11548.3	23627.2	27513.8	17444.1	16933.6	16420.7	37528.7	29180.4	34610.1	31032.7
M85T21	1.897	-0.923721	-2.34562	0.0282281	0.0229709	DOWN	85	85	85	21.2719	21.127	21.677	283173	223007	318205	464727	122330	155279	54127.2	91502.1	100500	97951.5	74534.2	104495	57889.9	55077.7	70434.8	33707.5	67587.2	90900.5	89022.4	76936.2	121605	88398.4	19240.2	115707	38937.6	17235	33970.7	23934.5	165811	69671.9	86566.3	60071.6	64258.4	117987	52727.4	48476.8	41304.8
M82T10	1.88904	-0.917654	-3.30283	0.00307684	0.00344683	DOWN	82	82	82	9.62272	9.41723	9.65118	758317	596570	1.02587e+06	1.09858e+06	456826	530249	255926	318709	351521	329213	302492	379234	223771	190623	285538	172941	429854	383793	407578	241783	315602	261585	85571.2	410103	152395	42874.3	144296	100053	374818	259733	232030	241704	220998	445892	163127	202360	182671
M97T18	1.88667	-0.915843	-3.95559	0.000485939	0.000661281	DOWN	97	97	97.1	17.5231	17.5075	17.9995	160774	78338.3	130991	111685	128786	233950	109987	44876	145793	44940.6	52668.2	95379.8	89123	102343	167803	102541	78777.6	58141.1	66753.3	32722.8	28119.7	32066.9	31393.6	126404	30623.9	50183.8	57603	28088.6	54221	72755.8	38819.5	37564.6	41924.4	104171	65386.3	91367.5	66665.3
M65T20	1.88485	0.914446	3.84162	0.000740665	0.000959908	UP	65	65	65	20.2079	20.0887	20.217	241648	199663	133084	192908	211613	122905	98960.3	104783	120958	118858	105991	55523.8	131441	148404	169594	173936	95326.3	91817.9	176725	393158	643289	568456	218273	187973	122128	236643	128547	189279	179972	206466	182882	212407	265658	142874	220906	221190	240756
M55T22	1.88335	0.913298	8.52559	1.93099e-09	8.85903e-09	UP	55	55	55	21.6533	21.643	21.6664	40566.6	43739	59217.9	66327.9	34276.5	36578.4	44994.7	39349	41167	42619	39208.6	52667.2	35157.6	39665.8	38658.6	41677.4	37954.2	32943.2	35025.8	53633.4	75920.4	59080.7	68995.6	138102	82535.3	80478.6	77860.8	70241.7	102874	75770.5	101212	84586.9	85565.9	73159.2	77058.4	72465	84295
M53T17	1.87913	0.910068	3.5833	0.00107635	0.00134726	UP	53	53	53	16.5046	16.3258	16.8061	21492.9	21940.4	15585.7	13751.9	16490.7	20816.4	63385.9	7408.45	10181.2	9695.59	12383	35012.1	38098.9	32990.6	26562.6	32018.1	22584.4	18964.8	20723.5	47348.8	62579.6	57693.4	16894.4	11948.7	7461.81	12027.6	15029.6	9002.8	44203	47581.5	57203.9	50501.1	54126.4	48929.9	73517	73020.3	68925.6
M81T17	1.87855	0.909622	3.75312	0.000689627	0.000902374	UP	81	81	81	16.5077	16.4957	16.5157	126859	137498	64032.5	78410.3	122881	120176	327369	50229.5	69260.3	84769.3	49676.5	199340	250540	178785	153127	197908	136443	120755	112901	279533	360950	359420	113025	86051	61050.6	83443.5	75068.7	56388	257149	276844	324202	269939	325253	287142	436471	423854	401093
[truncated: 73 more rows]
[truncated: 3 more columns]

## Sheet: supplemental table 4
Table S4: List of putative compounds identified from features using NIST library search.
[truncated: 84 more rows]

## Sheet: Supplemental table 5
Table S5: Concentration of wine volatiles in Norton and Cabernet Sauvigon. Concentrations are given in ug/L.
[truncated: 44 more rows]

[truncated: 4 more sheets: Supplemental table 6, supplemental table 7, Table 1, Table 2]
